# Supplementary material for: Reversibility of the thia-Michael reaction of cytotoxic C5-curcuminoid and structure–activity relationship of bis-thiol-adducts thereof
Source: Royal Society of Chemistry journal article supplement (doi:10.1039/c6ob01771a), 2016-01-01

## Supporting Information

### Reversibility of thia-Michael reaction of the cytotoxic C5-curcuminoid GO-Y030 and structure-activity relationship of the bis-thiol-adducts thereof

Aki Kohyama,<sup>a</sup> Michihiro Fukuda,<sup>a</sup> Shunsuke Sugiyama,<sup>b</sup> Hiroyuki Yamakoshi,<sup>a</sup> Naoki Kanoh,<sup>a</sup>  
Chikashi Ishioka,<sup>b</sup> Hiroyuki Shibata<sup>c</sup> and Yoshiharu Iwabuchi\*<sup>a</sup>

<sup>a</sup>Graduate School of Pharmaceutical Sciences, Tohoku University, 6-3 Aza-Aoba, Aramaki, Aoba-ku,  
Sendai 980-8578, Japan.

|                                                             |    |
|-------------------------------------------------------------|----|
| General Procedure.....                                      | 2  |
| Synthesis of GO-Y compounds .....                           | 3  |
| Data of GO-Y compounds .....                                | 6  |
| Data of others.....                                         | 15 |
| Experimental Procedure for <sup>1</sup> H-NMR studies ..... | 16 |
| UV spectra of GO-Y030-thiol-bis-adducts .....               | 17 |
| Δ Absorbance at 340 nm (thiol-bis-adducts).....             | 23 |
| UV spectra of GO-Y030-thiol-mono-adducts .....              | 24 |
| Δ Absorbance at 340 nm (thiol-mono-adducts) .....           | 28 |
| ClogP value predicted by ChemDraw.....                      | 29 |
| The solubility of GO-Y030 and GO-Y140 .....                 | 30 |
| Experimental Procedure for Biological Analysis .....        | 31 |
| <sup>1</sup> H and <sup>13</sup> C NMR spectra.....         | 32 |

## General Procedure

All reactions were carried out under an atmosphere of argon unless otherwise specified. Reactions were monitored by thin-layer chromatography (TLC) carried out on silica gel plates (Merck Kieselgel 60 F254; Fuji Silysia Chemical, Ltd., Research Triangle Park, NC, USA, NH TLC plates). Column chromatography was performed on Silica gel 60N (Kanto Chemical Co. Inc., spherical, neutral, 63–210  $\mu$  m) and flash column chromatography was performed on Silica gel 60N (Kanto Chemical Co. Inc.; spherical, neutral, 40–50  $\mu$  m). Yields refer to chromatographically and spectroscopically ( $^1\text{H-NMR}$ ) homogeneous materials unless otherwise stated. Reagents of the highest commercial quality were purchased and used without further purification. IR spectra were recorded on a JASCO *FT/IR-410* Fourier Transform Infrared Spectrophotometer or *Travel-IR<sup>TM</sup>*.  $^1\text{H-NMR}$  (400 and 600 MHz) and  $^{13}\text{C-NMR}$  spectra (100 and 150 MHz) were recorded on JEOL JNM-AL-400 and JEOL JNM-ECA-600 spectrometers, respectively. For  $^1\text{H-NMR}$  spectra, chemical shifts ( $\delta$ ) are given from TMS (0.00 ppm) in  $\text{CDCl}_3$  or  $\text{CHCl}_3$  (7.26 ppm) in  $\text{CDCl}_3$  or  $\text{CHD}_2\text{OD}$  (3.31 ppm) in  $\text{CD}_3\text{OD}$  or Acetone (2.10 ppm) in  $\text{D}_2\text{O}$  as internal standards. For  $^{13}\text{C-NMR}$  spectra, chemical shifts ( $\delta$ ) are given from  $\text{CDCl}_3$  (77.0 ppm) or  $\text{CD}_3\text{OD}$  (49.0 ppm) or sodium 3-trimethylsilyl-1-propanesulfonate (0.00 ppm) in  $\text{D}_2\text{O}$  as internal standards. The following abbreviations were used to explain the multiplicities: s = singlet, d = doublet, t = triplet, q = quartet, m = multiplet, sept = septet, br = broad. Mass spectra were recorded on a JEOL JMS-DX303, JEOL JNM-AL500 and JEOL JMS-700. Gel permeation chromatography (GPC) was performed on a JAI LC-908 equipped with JAIGEL-2H using  $\text{CHCl}_3$  as an eluent.

### **A. Synthetic procedure of bis adducts (GO-Y135, GO-Y139, GO-Y142, GO-Y146, GO-Y174, GO-Y176, GO-Y178, GO-Y144)**

To a solution of thiol (4 eq.) in  $\text{CH}_2\text{Cl}_2$  (0.05 M) was added **GO-Y030** (1 eq.) and  $\text{Et}_3\text{N}$  (1-4 eq.). After the starting material was consumed, the reaction mixture was concentrated *in vacuo*. The residue was purified by silica gel column chromatography to give bis adducts. Column conditions; GO-Y135: EtOAc/Hexane = 1:4 and GPC, GO-Y139: M/C = 1:20 to 1:10, GO-Y142: EtOAc/Hexane = 1:4 to 1:1, GO-Y146: M/C = 1:10 and GPC, GO-Y174: EtOAc/Hexane = 1:1 and GPC, GO-Y176: EtOAc/Hexane = 1:1 and GPC, GO-Y178: EtOAc/Hexane = 1:1 and GPC, GO-Y144: EtOAc/Hexane = 1:4

### **B. Synthetic procedure of bis adducts (GO-Y180, GO-Y185, GO-Y187, GO-Y189)**

To a solution of disulfide **Sc** (2 eq.) in DMF- $\text{H}_2\text{O}$  (9:1) (0.05 M) was added TCEP (2 eq.) as reducing agent. After the reaction mixture was stirred overnight, to the resulting solution was added  $\text{Et}_3\text{N}$  (13 eq.) and **GO-Y030** (1 eq.). After 10 min ~ 9 h, the reaction mixture was diluted with  $\text{Et}_2\text{O}$  and  $\text{H}_2\text{O}$ . The resulting solution was extracted with  $\text{Et}_2\text{O}$ . The combined organic layers were dried over  $\text{MgSO}_4$ , and concentrated *in vacuo*. The residue was purified by silica gel column chromatography to give concentrated *in vacuo*. The residue was purified by silica gel column chromatography to give bis adducts. Column conditions; GO-Y180: EtOAc/Hexane = 1:1 and GPC, GO-Y185: EtOAc/Hexane = 1:2, GO-Y187: EtOAc/Hexane = 1:4 and GPC, GO-Y189: EtOAc/Hexane = 1:4

### **C. Synthetic procedure of mono adducts (GO-Y181, GO-Y136, GO-Y138, GO-Y141, GO-Y145, GO-Y173, GO-Y175, GO-Y177, GO-Y143)**

To a solution of **GO-Y030** (1 eq.) in  $\text{CH}_2\text{Cl}_2$  (0.05 M) was added  $\text{Et}_3\text{N}$  (1-2 eq.) and thiol (0.5-2 eq.). After being stirred for 30 min ~ 1 h, the reaction mixture was concentrated *in vacuo*. The residue was purified by silica gel column chromatography to give mono adducts. Column conditions; GO-Y181: EtOAc/Hexane = 1:20 to 1:10, GO-Y136: EtOAc/Hexane = 1:4 to 1:1, GO-Y138: Methanol/ $\text{CHCl}_3$  = 1:20, GO-Y141: EtOAc/Hexane = 1:4 to 1:2, GO-Y145: Methanol/ $\text{CHCl}_3$  = 1:10 and GPC, GO-Y173:

EtOAc/Hexane = 1:1 and GPC, GO-Y175: EtOAc/Hexane = 1:1 and GPC, GO-Y177: EtOAc/Hexane = 1:1 and GPC, GO-Y143: EtOAc/Hexane = 1:4

#### D. Synthetic procedure of mono adducts (GO-Y179, GO-Y184, GO-Y186, GO-Y188)

To a solution of disulfide (0.5 eq.) in CH<sub>2</sub>Cl<sub>2</sub> (0.05 M) was added TCEP (0.5 eq.) as reducing agent. After the reaction mixture was stirred for 50 min ~ 12 h, to the resulting solution was added Et<sub>3</sub>N (4 eq.) and GO-Y030 (1 eq.). After 1 ~ 9 h, the reaction mixture was diluted with Et<sub>2</sub>O and H<sub>2</sub>O. The resulting solution was extracted with Et<sub>2</sub>O. The combined organic layers were dried over MgSO<sub>4</sub>, and concentrated *in vacuo*. The residue was purified by silica gel column chromatography to give concentrated *in vacuo*. Column conditions; GO-Y179: EtOAc/Hexane = 1:1 and GPC, GO-Y184: EtOAc/Hexane = 1:2 and GPC, GO-Y186: EtOAc/Hexane = 1:2 and GPC, GO-Y188: EtOAc/Hexane = 1:4

#### E. Synthesis of GO-Y140

To a solution of GO-Y030 (50.0 mg, 0.105 mmol) in MeOH (1 ml) was added glutathione (128 mg, 0.416 mmol) and Et<sub>3</sub>N (16  $\mu$ l, 1.1 mmol). After being stirred overnight, to the resulting solution was filtered and the residue was washed with H<sub>2</sub>O three times to give GO-Y140 (containing 12% Et<sub>3</sub>N, 21.6 mg, 0.0196 mmol, 19%).

The synthesis and spectral properties of compounds GO-Y030, GO-Y075, and GO-Y077 were reported in our previous paper<sup>a), b)</sup>.

#### Reference

- a) Ohori, H.; Yamakoshi, H.; Iwabuchi, Y.; Shibata, H. *et al. Mol. Cancer. Ther.* **2006**, *5*, 2563-2571.
- b) Yamakoshi, H.; Shibata, H.; Iwabuchi, Y. *et al. Bioorg. Med. Chem.* **2010**, *18*, 1083-1092.

## Preparation of disulfide S1~S3 (Scheme S1)

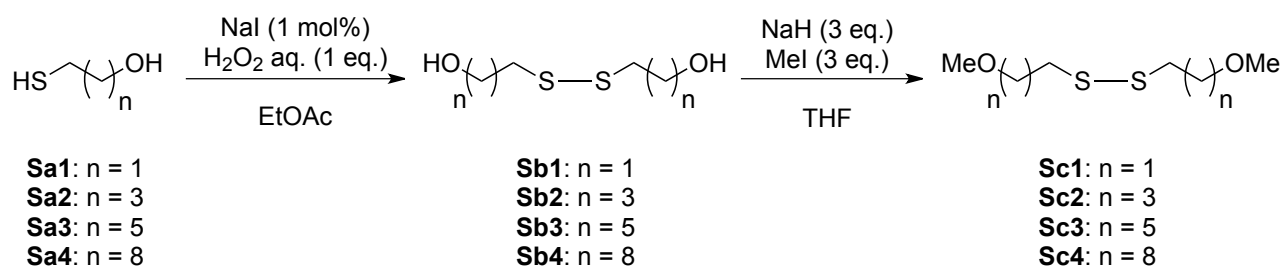

To a solution of thiol **Sa1~4** in EtOAc (1.0 M) was added NaI (1.0 mol%) and 30% aqueous H<sub>2</sub>O<sub>2</sub> (1.0 eq.). After being stirred for 10 min, the reaction mixture was quenched with sat. Na<sub>2</sub>S<sub>2</sub>O<sub>3</sub> aq.. The resulting solution was extracted with EtOAc. The combined organic layers were dried over MgSO<sub>4</sub>, and concentrated *in vacuo*. The residue was purified by silica gel column chromatography to give disulfide. The resulting crude disulfide in THF (1.0 M) was added NaH (3.0 eq.) followed by MeI (3.0 eq.) at 0 C. After being stirred for 6h~overnight, the reaction mixture was quenched with crushed ice. The resulting solution was extracted with EtOAc. The combined organic layers were dried over MgSO<sub>4</sub>, and concentrated *in vacuo*. The residue was purified by silica gel column chromatography (Methanol/CHCl<sub>3</sub> = 1 :10) to give methyl adducts.

## Data of GO-Yxxx compounds

### GO-Y181

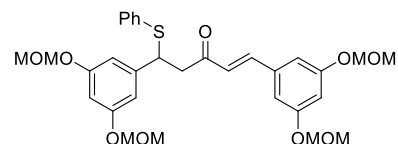

Colourless oil; IR (neat): 1689, 1662, 1593, 1439, 1400  $\text{cm}^{-1}$ ;  $^1\text{H-NMR}$  (400 MHz,  $\text{CDCl}_3$ )  $\delta$  7.39 (1H, d,  $J = 15.9$  Hz), 7.36-7.33 (2H, m), 7.25-7.22 (3H, m), 6.85 (2H, d,  $J = 2.2$  Hz), 6.77 (1H, t,  $J = 2.2$  Hz), 6.65 (2H, d,  $J = 2.2$  Hz), 6.62 (1H, d,  $J = 15.9$  Hz), 6.57 (1H, t,  $J = 2.2$  Hz), 5.16 (4H, s), 5.11-5.06 (4H, m), 4.76 (1H, dd,  $J = 6.9, 6.9$  Hz), 3.48 (6H, s), 3.44 (6H, s), 3.25 (1H, d,  $J = 6.9$  Hz), 3.23 (1H, d,  $J = 6.9$  Hz);  $^{13}\text{C-NMR}$  (100 MHz,  $\text{CDCl}_3$ )  $\delta$  196.7, 158.6, 158.2, 143.6, 142.9, 136.4, 134.2, 133.0, 128.8, 127.6, 126.8, 109.6, 109.3, 107.3, 103.8, 94.6, 94.5, 56.1, 56.0, 48.4, 46.5; LR-MS (FAB)  $m/z$  584 ( $\text{M}^+$ ), 45 (100%); HR-MS (FAB) Calcd. for  $\text{C}_{31}\text{H}_{36}\text{O}_9\text{S}$ : 584.2080, found: 584.2061.

### GO-Y135

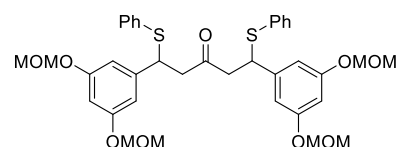

Colorless oil (diastereo mixture); IR (neat): 1714, 1593, 1438, 1400  $\text{cm}^{-1}$ ;  $^1\text{H-NMR}$  (400 MHz,  $\text{CDCl}_3$ )  $\delta$  7.39-6.98 (10H, m), 6.77-6.68 (1H, m), 6.57-6.50 (4H, m), 6.41-6.29 (1H, m), 5.10-5.02 (8H, m), 4.97-4.79 (0.33H, m), 4.59-4.53 (1.66H, m), 3.44-3.42 (12H, m), 3.35-3.32 (1.33H, m), 3.02-2.85 (2.66H, m);  $^{13}\text{C-NMR}$  (100 MHz,  $\text{CDCl}_3$ )  $\delta$  166.8, (158.2, 158.1), (143.3, 143.3), 133.8, (133.1, 133.0), (128.8, 128.7, 128.6), (127.6, 127.6), (109.1, 109.0), (103.8, 103.8), (94.5, 94.4), (56.0, 56.0), 49.1, (47.8, 47.7); LR-MS (EI)  $m/z$  694 ( $\text{M}^+$ ), 110 (100%); HR-MS (EI) Calcd. for  $\text{C}_{37}\text{H}_{42}\text{O}_9\text{S}_2$ : 694.2270, found: 694.2276.

### GO-Y136

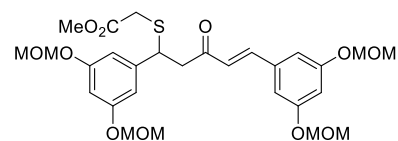

Colorless oil; IR ( $\text{CDCl}_3$ ): 1736, 1592, 1438, 1213  $\text{cm}^{-1}$ ;  $^1\text{H-NMR}$  (400 MHz,  $\text{CDCl}_3$ )  $\delta$  7.43 (1H, d,  $J = 16.1$  Hz), 6.87 (2H, d,  $J = 2.5$  Hz), 6.77 (1H, t,  $J = 2.5$  Hz), 6.74 (1H, d,  $J = 16.1$  Hz), 6.73 (2H, d,  $J = 2.1$  Hz), 6.63 (1H, t,  $J = 2.1$  Hz), 5.16-5.12 (8H, m), 4.56 (1H, d,  $J = 6.9$  Hz), 3.69 (3H, s), 3.48 (6H, s), 3.47 (6H, s), 3.21 (2H, d,  $J = 6.9$  Hz), 3.10 (2H, d,  $J = 8.8$  Hz);  $^{13}\text{C-NMR}$  (100 MHz,  $\text{CDCl}_3$ )  $\delta$  196.0, 170.5, 158.6, 158.4, 143.1, 143.0, 136.4, 126.6, 109.55, 109.48, 107.2, 103.8, 94.55, 94.48, 56.1, 52.4, 46.6, 44.8, 33.0; LR-MS (EI)  $m/z$  581 ( $[\text{M}+\text{H}]^+$ ), 251 (100%); HR-MS (EI) Calcd. for  $\text{C}_{28}\text{H}_{37}\text{O}_{11}\text{S}$ : 581.2057, found: 581.2075.

### GO-Y137

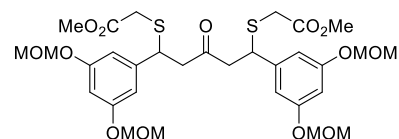

Colorless oil (diastereo mixture); IR (CHCl<sub>3</sub>): 1736, 1592, 1438, 1213 cm<sup>-1</sup>; <sup>1</sup>H-NMR (400 MHz, CDCl<sub>3</sub>) δ 6.64 (2H, d, *J* = 2.0 Hz), 6.62 (2H, d, *J* = 2.0 Hz), 6.60, (2H, t, *J* = 2.0 Hz), 5.16-5.07 (8H, m), 4.44-4.38 (2H, m), 3.68 (3H, s), 3.67 (3H, s), 3.47 (6H, s), 3.46 (6H, s), 3.10-2.85 (8H, m); <sup>13</sup>C-NMR (100 MHz, CDCl<sub>3</sub>) δ 202.9, (170.5, 170.4), (158.4, 158.3), (142.83, 142.81), (109.33, 109.30), (103.9, 103.8), (94.54, 94.52), (56.10, 56.09), (52.35, 52.32), 49.0, 44.1, (32.9, 32.8); LR-MS (FAB) *m/z* 686 (M<sup>+</sup>); HR-MS (FAB) Calcd. for C<sub>31</sub>H<sub>42</sub>O<sub>13</sub>S<sub>2</sub>: 686.2067, found: 686.2050.

### GO-Y138

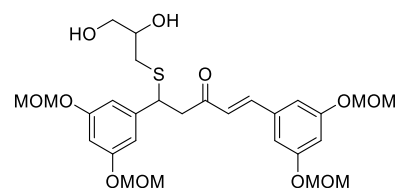

Colorless oil (diastereo mixture); IR (CDCl<sub>3</sub>): 3450, 1658, 1593, 1453 cm<sup>-1</sup>; <sup>1</sup>H-NMR (400 MHz, CDCl<sub>3</sub>) δ 7.46 (0.5H, d, *J* = 15.9 Hz), 7.46 (0.5H, d, *J* = 16.4 Hz), 6.88 (2H, d, *J* = 2.1 Hz), 6.77 (1H, t, *J* = 2.1 Hz), 6.74 (1H, d, *J* = 1.9 Hz), 6.73 (1H, d, *J* = 2.4 Hz), 6.68 (0.5H, d, *J* = 15.9 Hz), 6.67 (0.5H, d, *J* = 16.4 Hz), 6.64-6.62 (1H, m), 5.20-5.12 (8H, m), 4.45 (0.5H, dd, *J* = 6.1, 8.3 Hz), 4.41 (0.5H, dd, *J* = 6.1, 8.3 Hz), 3.84-3.79 (0.5H, m), 3.74-3.68 (0.5H, m), 3.70-3.56 (2H, m), 3.483 (6H, s), 3.476 (6H, s), 3.23 (0.5H, dd, *J* = 8.3, 17.0 Hz), 3.22 (0.5H, dd, *J* = 8.3, 17.0 Hz), 3.14 (1H, dd, *J* = 6.1, 17.0 Hz), 2.60-2.46 (2H, m), 1.71 (2H, brs); <sup>13</sup>C-NMR (100 MHz, CDCl<sub>3</sub>) δ (196.8, 196.6), 158.6, 158.4, 144.1, (143.3, 143.2), 136.2, 126.4, 109.5, (109.2, 109.1), 107.4, 103.9, (94.5, 94.4, 94.4, two carbon), 71.1, 69.4, 65.3, (56.1, 56.1), (47.3, 47.0), 45.2, 43.9, (35.2, 34.8); LR-MS (FAB) *m/z* 583 ([M+H]<sup>+</sup>); HR-MS (FAB) Calcd. for C<sub>29</sub>H<sub>39</sub>O<sub>11</sub>S: 583.2213, found: 583.2214.

### GO-Y139

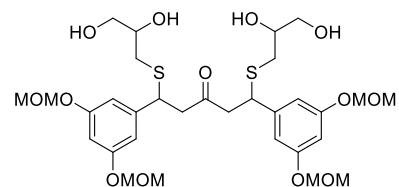

Yellow oil (diastereo mixture); IR (neat): 3420, 2925, 1715, 1597, 1460 cm<sup>-1</sup>; <sup>1</sup>H-NMR (400 MHz, CD<sub>3</sub>OD) δ 6.67-6.65 (2H, m), 6.64-6.62 (2H, m), 6.58-6.57 (1H, m), 6.55-6.53 (1H, m), 5.15-5.10 (8H, m), 4.27-4.22 (2H, m), 3.65-3.56 (2H, m), 3.55-3.42 (4H, m), 3.44 (6H, s), 3.42 (6H, s), 3.05-2.84 (4H, m), 2.54-2.33 (4H, m); <sup>13</sup>C-NMR (100 MHz, CDCl<sub>3</sub>) δ (206.8, 206.7), (159.7, 159.6), (145.6, 145.6, 145.6), (110.4, 110.4, 110.3, 110.3), 104.7, (95.5, 95.5), (72.7, 72.2), 65.9, (56.3, 56.3), (50.5, 50.4,

50.4), (45.7, 45.7, 45.6, 45.6), (35.5, 35.5, 35.3, 35.2); LR-MS (FAB)  $m/z$  713 ( $[M+Na]^+$ ), 45 (100%); HR-MS (FAB) Calcd. for  $C_{31}H_{46}O_{13}S_2Ns$ : 713.2278, found: 713.2278.

### GO-Y141

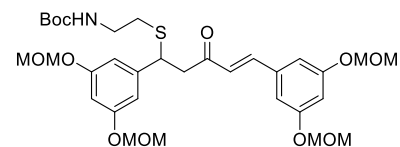

Colorless oil; IR (neat): 3377, 1711, 1663, 1593, 1509, 1454  $cm^{-1}$ ;  $^1H$ -NMR (400 MHz,  $CDCl_3$ )  $\delta$  7.43 (1H, d,  $J = 16.4$  Hz), 6.87 (2H, d,  $J = 1.9$  Hz), 6.77 (1H, t,  $J = 1.9$  Hz), 6.73 (2H, d,  $J = 2.2$  Hz), 6.64 (1H, d,  $J = 16.4$  Hz), 6.62 (1H, t,  $J = 2.2$  Hz), 5.16-5.14 (8H, m), 4.96 (1H, brs), 4.39 (1H, dd,  $J = 7.1, 7.1$  Hz), 3.48 (6H, s), 3.47 (6H, s), 3.30-3.11 (4H, m), 2.55-2.50 (2H, m), 1.43 (9H, s); LR-MS (FAB)  $m/z$  652 ( $[M+H]^+$ ); HR-MS (FAB) Calcd. for  $C_{32}H_{46}NO_{11}S$ : 652.2792, found: 652.2817.

### GO-Y142

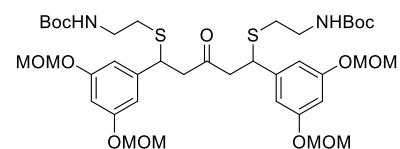

Colorless oil (diastereo mixture); IR ( $CHCl_3$ ): 3370, 1713, 1595, 1512  $cm^{-1}$ ;  $^1H$ -NMR (400 MHz,  $CDCl_3$ )  $\delta$  6.60 (2H, d,  $J = 1.9$  Hz), 6.27-6.60 (3H, m), 6.59 (1H, t,  $J = 1.9$  Hz), 5.16-5.10 (8H, m), 4.25-4.20 (2H, m), 3.47-3.46 (12H, m), 3.40-3.22 (4H, m), 2.98-2.79 (4H, m), 2.50-2.43 (4H, m), 1.40 (18H, s);  $^{13}C$ -NMR (150 MHz,  $CDCl_3$ )  $\delta$  203.7, (158.49, 158.46), 155.7, (144.2, 144.1), (109.1, 109.0), (103.9, 103.8), 94.5, 79.3, 56.2, 49.9, (43.78, 43.73), 39.4, (32.03, 31.96), 28.5; LR-MS (FAB)  $m/z$  829 ( $[M+H]^+$ ), 57 (100%); HR-MS (FAB) Calcd. for  $C_{39}H_{61}N_2O_{13}S_2$ : 829.3615, found: 829.3631.

### GO-Y145

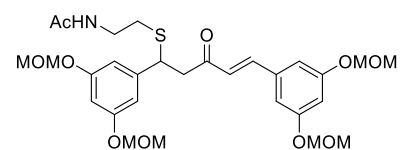

Colorless oil; IR ( $CHCl_3$ ): 1659, 1593, 1453  $cm^{-1}$ ;  $^1H$ -NMR (400 MHz,  $CDCl_3$ )  $\delta$  7.46 (1H, d,  $J = 16.1$  Hz), 6.88 (2H, d,  $J = 2.1$  Hz), 6.77 (1H, t,  $J = 2.1$  Hz), 6.73 (2H, d,  $J = 2.3$  Hz), 6.67 (1H, d,  $J = 16.1$  Hz), 6.63 (1H, t,  $J = 2.3$  Hz), 6.19 (1H, brs), 5.17 (4H, s), 5.15 (4H, s), 4.36 (1H, dd,  $J = 8.5, 5.8$  Hz), 3.48 (6H, s), 3.47 (6H, s), 3.48-3.30 (2H, m), 3.22 (1H, dd,  $J = 16.9, 8.5$  Hz), 3.11 (1H, dd,  $J = 16.9, 5.8$  Hz), 2.62-2.50 (2H, m), 1.99 (3H, s);  $^{13}C$ -NMR (100 MHz,  $CDCl_3$ )  $\delta$  196.7, 170.1, 158.6, 158.5, 144.5, 143.2, 136.3, 126.6, 109.5, 109.1, 107.4, 103.8, 74.5, 56.1, 56.1, 47.1, 44.1, 38.1, 31.5, 23.2; LR-MS (FAB)  $m/z$  594 ( $[M+H]^+$ ); HR-MS (FAB) Calcd. for  $C_{29}H_{40}NO_{10}S$ : 594.2295, found: 594.2366.



**GO-Y146**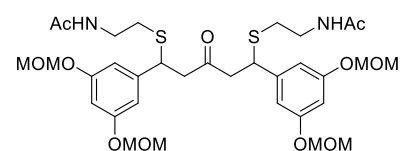

Colorless oil; IR (CHCl<sub>3</sub>): 3314, 1719, 1656, 1595, 1460 cm<sup>-1</sup>; <sup>1</sup>H-NMR (400 MHz, CDCl<sub>3</sub>) δ 6.65 (4H, d, *J* = 2.0 Hz), 6.63 (2H, d, *J* = 2.0 Hz), 5.98 (2H, brs), 5.15 (8H, s), 4.22 (2H, t, *J* = 7.1 Hz), 3.48 (12H, s), 3.40-3.21 (4H, m), 2.94-2.85 (4H, m), 2.57-2.43 (4H, m), 1.96 (6H, s); <sup>13</sup>C-NMR (100 MHz, CDCl<sub>3</sub>) δ 204.3, (170.2, 170.1), (158.5, 158.4), (144.0, 144.0), (109.0, 108.9), (104.0, 103.9) (94.5, 94.4), (56.2, 56.1), (49.8, 49.8), (43.8, 43.7), (38.2, 38.1), (31.5, 31.4), (23.1, 23.1); LR-MS (FAB) *m/z* 713 ([M+H]<sup>+</sup>), 45 (100%); HR-MS (FAB) Calcd. for C<sub>33</sub>H<sub>49</sub>N<sub>2</sub>O<sub>11</sub>S<sub>2</sub>: 713.2778, found: 713.2795.

**GO-Y140**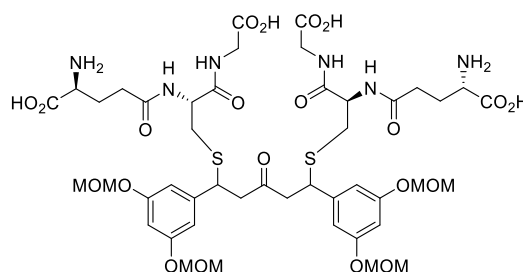

White solid; IR (solid): 3419, 1652, 1558, 1456 cm<sup>-1</sup>; <sup>1</sup>H-NMR (400 MHz, D<sub>2</sub>O) δ 6.66-6.54 (6H, m), 5.21-5.18 (8H, m), 4.40-4.36 (2H, m), 4.24-4.13 (4H, m), 3.93-3.84 (4H, m), 3.79-3.73 (2H, m), 3.47 (12H, s), 3.20-2.61 (6H, m), 2.49-2.38 (4H, m), 2.20-2.06 (4H, m), 1.27 (1.16H, t, *J* = 7.0 Hz, from Et<sub>3</sub>N); <sup>13</sup>C-NMR (100 MHz, pH 8.0 PBS buffer D<sub>2</sub>O) δ (211.2, 211.1) (179.1, 178.94, 178.92, 178.89), (177.8, 177.5, 177.3), (176.9, 176.8, 176.7), (174.5, 174.5, 174.3), (160.4, 160.3), (146.7, 146.3), (112.7, 112.50, 112.44), (107.5, 107.3, 102.8), (97.3, 97.2), (58.8, 58.5), 57.2, 57.0), (55.7, 55.6), 49.5, 46.2 (from Et<sub>3</sub>N), (34.3, 34.2), 29.1, 29.0, 28.3, 11.1 (from Et<sub>3</sub>N); LR-MS (FAB) *m/z* 1089 ([M+H]<sup>+</sup>), 154 (100%); HR-MS (FAB) Calcd. for C<sub>45</sub>H<sub>65</sub>O<sub>21</sub>S<sub>2</sub>: 1089.3644, found: 1089.3687.

**GO-Y173**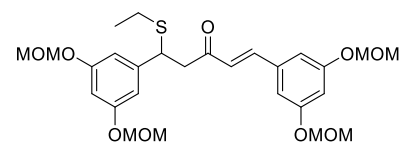

Pale yellow oil; IR (neat): 2956, 2826, 1659, 1593, 1453 cm<sup>-1</sup>; <sup>1</sup>H-NMR (400 MHz, CDCl<sub>3</sub>) δ 7.42 (1H, d, *J* = 16.0 Hz), 6.87 (2H, d, *J* = 2.0 Hz), 6.77 (1H, t, *J* = 2.0 Hz), 6.74 (2H, d, *J* = 2.4 Hz), 6.64 (1H, d, *J* = 16.4 Hz), 6.62 (1H, t, *J* = 2.0 Hz), 5.16-5.12 (8H, m), 4.40 (1H, t, *J* = 7.2 Hz), 3.48 (6H, s), 3.47 (6H, s), 3.16 (2H, d, *J* = 6.8 Hz), 2.41 (2H, m), 1.19 (3H, t, *J* = 7.6 Hz); <sup>13</sup>C-NMR (100 MHz, CDCl<sub>3</sub>) δ 196.8, 158.6, 158.3, 144.7, 142.8, 136.5, 126.8, 109.5, 109.3, 107.2, 103.5, 94.6, 94.5, 56.1, 56.0, 47.2, 44.3, 25.6, 14.3; LR-MS (EI) *m/z* 536 [M]<sup>+</sup>, 62 (100%); HR-MS (EI) Calcd. for C<sub>27</sub>H<sub>36</sub>O<sub>9</sub>S: 536.2080, found: 536.2034.

### GO-Y174

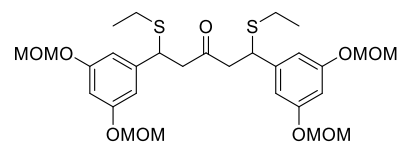

Pale yellow oil (diastereo mixture); IR (neat) : 2958, 1720, 1596, 1453  $\text{cm}^{-1}$ ;  $^1\text{H-NMR}$  (400 MHz,  $\text{CDCl}_3$ )  $\delta$  6.65 (2H, d,  $J = 2.4\text{Hz}$ ), 6.63 (2H, d,  $J = 2.8\text{ Hz}$ ), 6.61 (1H, t,  $J = 2.2\text{Hz}$ ), 6.58 (1H, t,  $J = 2.2\text{ Hz}$ ), 5.16-5.09 (8H, m), 4.27-4.22 (2H, m), 3.47 (6H, s), 3.45 (6H, s), 2.97-2.90 (2H, m), 2.88-2.79 (2H, m), 2.39-2.28 (4H, m), 1.15 (3H, t,  $J = 7.6\text{ Hz}$ ), 1.13 (3H, t, 7.6 Hz);  $^{13}\text{C-NMR}$  (100 MHz,  $\text{CDCl}_3$ )  $\delta$  (204.1, 204.0), (158.2, 158.1), (144.3, 144.2), (109.0, 108.9), (103.3, 103.2), 94.4, (55.90, 55.89), 49.8, (43.50, 43.48), (25.32, 25.27), (14.14, 14.12); LR-MS (EI)  $m/z$  598  $[\text{M}]^+$ , 45 (100%); HR-MS (EI) Calcd. for  $\text{C}_{29}\text{H}_{42}\text{O}_9\text{S}_2$ : 598.2270, found: 598.2272.

### GO-Y175

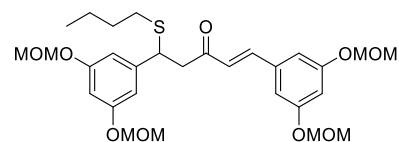

Pale yellow oil; IR (neat) : 2956, 1664, 1594, 1454  $\text{cm}^{-1}$ ;  $^1\text{H-NMR}$  (400 MHz,  $\text{CDCl}_3$ )  $\delta$  7.42 (1H, d,  $J = 15.8\text{ Hz}$ ), 6.86 (2H, d,  $J = 2.1\text{ Hz}$ ), 6.78 (1H, t,  $J = 2.1\text{ Hz}$ ), 6.74 (2H, d,  $J = 2.6\text{ Hz}$ ), 6.64 (1H, d,  $J = 15.8\text{ Hz}$ ), 6.61 (1H, t,  $J = 2.6\text{ Hz}$ ), 5.16-5.11 (8H, m), 4.37 (1H, t,  $J = 7.2\text{ Hz}$ ), 3.48 (6H, s), 3.46 (6H, s), 3.16 (2H, d,  $J = 7.2\text{ Hz}$ ), 2.45-2.30 (2H, m), 1.54-1.45 (2H, m), 1.37-1.27 (2H, m), 0.85 (3H, t,  $J = 7.2\text{ Hz}$ );  $^{13}\text{C-NMR}$  (100 MHz,  $\text{CDCl}_3$ )  $\delta$  196.8, 158.6, 158.3, 144.8, 142.8, 136.5, 126.9, 109.5, 109.3, 107.2, 103.5, 94.55, 94.49, 56.09, 56.06, 47.3, 44.6, 31.3, 21.9, 13.6; LR-MS (EI)  $m/z$  564  $[\text{M}]^+$ , 474 (100%); HR-MS (EI) Calcd. for  $\text{C}_{29}\text{H}_{40}\text{O}_9\text{S}$ : 564.2393, found: 564.2380.

### GO-Y176

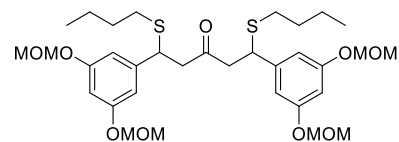

Pale yellow oil (diastereo mixture); IR (neat): 2956, 1720, 1596, 1462  $\text{cm}^{-1}$ ;  $^1\text{H-NMR}$  (400 MHz,  $\text{CDCl}_3$ )  $\delta$  6.65 (2H, d,  $J = 2.4\text{ Hz}$ ), 6.63 (2H, d,  $J = 2.4\text{ Hz}$ ), 6.61 (1H, t,  $J = 2.2\text{ Hz}$ ), 6.58 (1H, t,  $J = 2.2\text{ Hz}$ ), 5.16-5.09 (8H, m), 4.24-4.18 (2H, m), 3.47 (6H, s), 3.45 (6H, s), 2.96-2.90 (2H, m), 2.87-2.79 (2H, m), 2.36-2.25 (4H, m), 1.45 (4H, m), 1.30 (4H, m), 0.84 (3H, t,  $J = 7.2\text{ Hz}$ ), 0.83 (3H, t,  $J = 7.6\text{ Hz}$ );  $^{13}\text{C-NMR}$  (100 MHz,  $\text{CDCl}_3$ )  $\delta$  (204.1, 204.0), (158.21, 158.18), (144.46, 144.41), (109.1, 109.0), (103.41, 103.39), (94.43, 94.42), (56.0, 55.9), (49.90, 49.88), (43.9, 43.8), (31.13, 31.11, 31.10, 31.0, two carbon), (21.82, 21.79) 13.5; LR-MS (EI)  $m/z$  654  $[\text{M}]^+$ , 56 (100%); HR-MS (EI) Calcd. for  $\text{C}_{33}\text{H}_{50}\text{O}_9\text{S}_2$ : 654.2896, found: 654.2852.

### GO-Y177

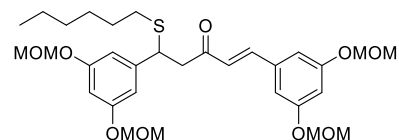

pale yellow oil; IR (neat) : 2928, 1664, 1593, 1454  $\text{cm}^{-1}$ ;  $^1\text{H-NMR}$  (400 MHz,  $\text{CDCl}_3$ )  $\delta$  7.42 (1H, d,  $J = 16.4$  Hz), 6.86 (2H, d,  $J = 2.4$  Hz), 6.76 (1H, t,  $J = 2.4$  Hz), 6.74 (2H, d,  $J = 2.0$  Hz), 6.64 (1H, d,  $J = 16.4$  Hz), 6.61 (1H, t,  $J = 2.4$  Hz), 5.16-5.12 (8H, m), 4.37 (1H, t,  $J = 7.4$  Hz), 3.48 (6H, s), 3.46 (6H, s), 3.16 (2H, d,  $J = 7.4$  Hz), 2.43-2.30 (2H, m), 1.55-1.46 (2H, m), 1.32-1.20 (6H, m), 0.85 (3H, t,  $J = 6.8$  Hz);  $^{13}\text{C-NMR}$  (100 MHz,  $\text{CDCl}_3$ )  $\delta$  196.8, 158.6, 158.3, 144.8, 142.8, 136.5, 126.8, 109.5, 109.3, 107.2, 103.5, 94.53, 94.47, 56.1, 56.0, 47.3, 44.6, 31.6, 31.3, 29.1, 28.5, 22.5, 13.9; LR-MS (EI)  $m/z$  592  $[\text{M}]^+$ , 56 (100%); HR-MS (EI) Calcd. for  $\text{C}_{31}\text{H}_{44}\text{O}_9\text{S}$ : 592.2706, found: 592.2690.

### GO-Y178

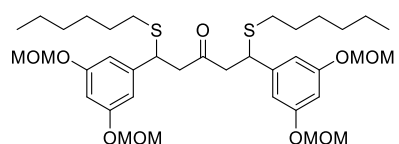

Pale yellow oil (diastereo mixture); IR (neat): 2927, 1719, 1596, 1457  $\text{cm}^{-1}$ ;  $^1\text{H-NMR}$  (400 MHz,  $\text{CDCl}_3$ )  $\delta$  6.65 (2H, d,  $J = 2.0$  Hz), 6.63 (2H, d,  $J = 2.0$  Hz), 6.61 (1H, t,  $J = 2.2$  Hz), 6.58 (1H, t,  $J = 2.2$  Hz), 5.16-5.09 (8H, m), 4.24-4.18 (2H, m), 3.47 (6H, s), 3.45 (6H, s), 2.96-2.90 (2H, m), 2.86-2.79 (2H, m), 2.36-2.24 (4H, m), 1.46 (4H, m), 1.31-1.18 (12H, m), 0.86 (3H, t,  $J = 7.2$  Hz), 0.85 (3H, t,  $J = 7.2$  Hz);  $^{13}\text{C-NMR}$  (100 MHz,  $\text{CDCl}_3$ )  $\delta$  204.1, (158.22, 158.19), (144.5, 144.4), (109.1, 109.0), (103.41, 103.37), (94.43, 94.42), (56.0, 55.9), (49.91, 49.87), (43.88, 43.87), (31.44, 31.38, 31.2, two carbon), (29.03, 29.02), (28.41, 28.39), 22.4, 13.9; LR-MS (EI)  $m/z$  710  $[\text{M}]^+$ , 56 (100%); HR-MS (EI) Calcd. for  $\text{C}_{37}\text{H}_{58}\text{O}_9\text{S}_2$ : 710.3522, found: 710.3505.

### GO-Y143

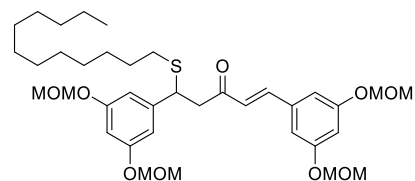

Colorless oil; IR ( $\text{CHCl}_3$ ): 1692, 1666, 1592, 1454  $\text{cm}^{-1}$ ;  $^1\text{H-NMR}$  (400 MHz,  $\text{CDCl}_3$ )  $\delta$  7.42 (1H, d,  $J = 16.2$  Hz), 6.86 (2H, d,  $J = 2.3$  Hz), 6.76 (1H, t,  $J = 2.3$  Hz), 6.73 (2H, d,  $J = 2.4$  Hz), 6.64 (1H, d,  $J = 16.2$  Hz), 6.61 (1H, t,  $J = 2.4$  Hz), 5.15-5.11 (8H, m), 4.36 (1H, t,  $J = 7.2$  Hz), 3.48 (6H, s), 3.46 (6H, s), 3.16 (2H, d,  $J = 7.2$  Hz), 2.41-2.29 (2H, m), 1.54-1.47 (2H, m), 1.32-1.22 (18H, m), 0.87 (3H, t,  $J = 7.0$  Hz);  $^{13}\text{C-NMR}$  (100 MHz,  $\text{CDCl}_3$ )  $\delta$  196.8, 158.6, 158.3, 144.8, 142.8, 136.5, 126.9, 109.5, 109.3, 107.2, 103.5, 94.6, 94.5, 56.11, 56.08, 47.2, 44.6, 31.9, 31.6, (29.63, 29.61, 29.58, 29.50, 29.3, 29.2, 28.9, eight carbon), 22.7, 14.1; LR-MS (EI)  $m/z$  676 ( $\text{M}^+$ ), 474 (100%); HR-MS (EI) Calcd. for  $\text{C}_{37}\text{H}_{56}\text{O}_9\text{S}$ : 676.3645, found : 676.3654.

**GO-Y144**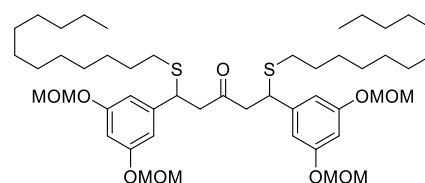

Colorless oil (diastereo mixture); IR (CHCl<sub>3</sub>): 1720, 1595, 1462 cm<sup>-1</sup>; <sup>1</sup>H-NMR (400 MHz, CDCl<sub>3</sub>) δ 6.64 (2H, d, *J* = 2.1 Hz), 6.62 (2H, d, *J* = 2.1 Hz), 6.60 (1H, t, *J* = 2.1 Hz), 6.58 (1H, t, *J* = 2.1 Hz), 5.12 (8H, m), 4.23-4.18 (2H, m), 3.48 (6H, s), 3.47 (6H, s), 2.96-2.90 (2H, m), 2.85-2.78 (2H, m), 2.38-2.21 (4H, m), 1.50-1.42 (4H, m), 1.32-1.27 (36H, m), 0.87 (6H, t, *J* = 6.76 Hz); <sup>13</sup>C-NMR (100 MHz, CDCl<sub>3</sub>) δ (204.21, 204.16), (158.31, 158.28), (144.6, 144.5), (109.2, 109.1), (103.51, 103.48), (94.6, 94.5), (56.07, 56.06), (50.0, 49.9), (43.98, 43.96), (31.9, 31.6, 31.5), 29.63, 29.61, 29.58, 29.50, 29.48, 29.3, 29.2, 28.89, 28.87, 22.7, 14.1; LR-MS (ESI) *m/z* 901 ([M+Na]<sup>+</sup>), (100%), 917 ([M+K]<sup>+</sup>); HR-MS (ESI) Calcd. for C<sub>49</sub>H<sub>82</sub>O<sub>9</sub>S<sub>2</sub>Na: 901.5292, found: 901.5260.

**GO-Y179**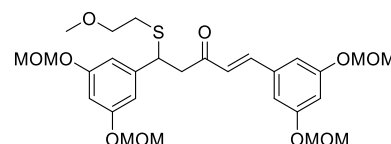

Pale yellow oil; IR (neat): 2927, 1663, 1593, 1453 cm<sup>-1</sup>; <sup>1</sup>H-NMR (400 MHz, CDCl<sub>3</sub>) δ 7.42 (1H, d, *J* = 16.0 Hz), 6.86 (2H, d, *J* = 2.0 Hz), 6.77 (1H, t, *J* = 2.2 Hz), 6.74 (2H, d, *J* = 2.0 Hz), 6.64 (1H, d, *J* = 16.0 Hz), 6.62 (1H, t, *J* = 2.2 Hz), 5.17-5.11 (8H, m), 4.44 (1H, t, *J* = 7.2 Hz), 3.48 (6H, s), 3.46 (6H, s), 3.45 (2H, t, *J* = 5.2 Hz), 3.30 (3H, s), 3.17 (2H, d, *J* = 6.8 Hz), 2.58 (2H, q, *J* = 6.8 Hz); <sup>13</sup>C-NMR (100 MHz, CDCl<sub>3</sub>) δ 196.8, 158.6, 158.4, 144.8, 142.9, 136.4, 126.8, 109.5, 109.3, 107.2, 103.6, 94.54, 94.48, 71.6, 58.6, 56.09, 56.08, 47.2, 44.8, 30.9; LR-MS (EI) *m/z* 566 [M]<sup>+</sup>, 474 (100%); HR-MS (EI) Calcd. for C<sub>28</sub>H<sub>38</sub>O<sub>10</sub>S: 566.2186, found: 564.2179.

**GO-Y180**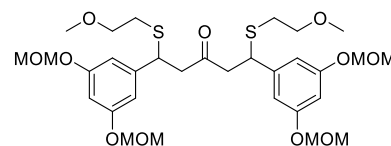

Pale yellow oil (diastereo mixture); IR (neat): 2926, 1718, 1596, 1458 cm<sup>-1</sup>; <sup>1</sup>H-NMR (400 MHz, CDCl<sub>3</sub>) δ 6.65-6.58 (6H, m), 5.16-5.09 (8H, m), 4.30-4.25 (2H, m), 3.47 (6H, s), 3.45 (6H, s), 3.44-3.36 (4H, m), 3.29 (3H, s), 3.28 (3H, s), 2.96-2.91 (2H, m), 2.87-2.80 (2H, m), 2.57-2.47 (4H, m); <sup>13</sup>C-NMR (100 MHz, CDCl<sub>3</sub>) δ (203.8, 203.79), (158.4, 158.3), (144.2, 144.1), (109.23, 109.18), (103.64, 103.61), (94.6, 94.5), (71.7, 71.6), 58.6, (56.12, 56.10), 49.9, (44.2, 44.1), (30.84, 30.79); LR-MS (FAB) *m/z* 658 [M]<sup>+</sup>, 45 (100%); HR-MS (FAB) Calcd. for C<sub>31</sub>H<sub>46</sub>O<sub>11</sub>S<sub>2</sub>: 658.2482, found: 658.2448.

### GO-Y184

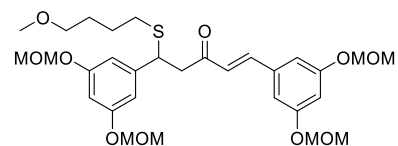

Colorless oil; IR (CHCl<sub>3</sub>): 2933, 1663, 1593, 1452 cm<sup>-1</sup>; <sup>1</sup>H-NMR (600 MHz, CDCl<sub>3</sub>) δ 7.42 (1H, d, *J* = 16.4 Hz), 6.87 (2H, d, *J* = 2.1 Hz), 6.77 (1H, t, *J* = 2.1 Hz), 6.74 (1H, d, *J* = 2.6 Hz), 6.64 (1H, d, *J* = 16.4 Hz), 6.61 (2H, t, *J* = 2.6 Hz), 5.17-5.12 (8H, m), 4.37 (1H, t, *J* = 7.3 Hz), 3.48 (6H, s), 3.47 (6H, s), 3.31 (2H, t, *J* = 5.8 Hz), 3.29 (3H, s), 3.16 (2H, d, *J* = 7.3 Hz), 2.46-2.41 (1H, m), 2.38-2.34 (1H, m), 1.63-1.56 (4H, m); <sup>13</sup>C-NMR (150 MHz, CDCl<sub>3</sub>) δ 196.8, 158.6, 158.3, 144.7, 142.9, 136.5, 126.8, 109.5, 109.3, 107.2, 103.5, 94.6, 94.5, 72.2, 58.5, 56.11, 56.09, 47.2, 44.5, 31.4, 28.7, 25.8; LR-MS (FAB) *m/z* 594 [M]<sup>+</sup>, 45 (100%); HR-MS (FAB) Calcd. for C<sub>30</sub>H<sub>42</sub>O<sub>10</sub>S: 714.3108, found: 714.3113.

### GO-Y185

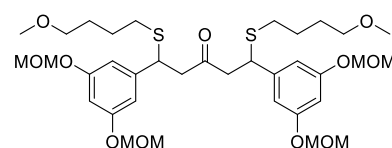

Colorless oil (diastereo mixture); IR (CHCl<sub>3</sub>): 2931, 1719, 1595, 1456 cm<sup>-1</sup>; <sup>1</sup>H-NMR (400 MHz, CDCl<sub>3</sub>) δ 6.65 (2H, d, *J* = 2.1 Hz), 6.63 (2H, d, *J* = 2.1 Hz), 6.61 (1H, t, *J* = 2.1 Hz), 6.58 (1H, t, *J* = 2.1 Hz), 5.16-5.09 (8H, m), 4.23-4.18 (2H, m), 3.47 (6H, s), 3.46 (6H, s), 3.29-3.31 (4H, m), 3.29 (3H, s), 3.28 (3H, s), 2.96-2.90 (2H, m), 2.85-2.78 (2H, m), 2.49-2.25 (4H, m), 1.60-1.48 (8H, m); <sup>13</sup>C-NMR (100 MHz, CDCl<sub>3</sub>) δ (204.1, 204.0), (158.3, 158.3), (144.4, 144.4), (109.11, 109.05), (103.50, 103.46), (94.50, 94.48), (72.10, 72.08), 58.4, (56.1, 56.0), (49.93, 48.89), 43.9, (31.24, 31.18), (28.62, 28.59), (25.72, 25.71); LR-MS (FAB) *m/z* 714 [M]<sup>+</sup>, 45 (100%); HR-MS (FAB) Calcd. for C<sub>35</sub>H<sub>54</sub>O<sub>11</sub>S<sub>2</sub>: 594.2499, found: 594.2507.

### GO-Y186

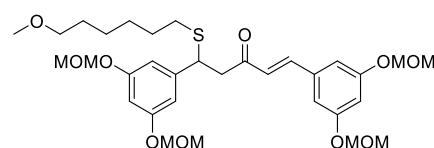

Colorless oil; IR (CHCl<sub>3</sub>): 2932, 1664, 1593, 1453 cm<sup>-1</sup>; <sup>1</sup>H-NMR (400 MHz, CDCl<sub>3</sub>) δ 7.42 (1H, d, *J* = 16.2 Hz), 6.86 (2H, d, *J* = 2.2 Hz), 6.77 (1H, t, *J* = 2.2 Hz), 6.73 (2H, d, *J* = 2.2 Hz), 6.64 (1H, d, *J* = 16.2 Hz), 6.62-6.60 (1H, m), 5.16-5.12 (8H, m), 4.35 (1H, t, *J* = 7.1 Hz), 3.48 (6H, s), 3.46 (6H, s), 3.35-3.27 (5H, m), 3.15 (2H, d, *J* = 7.1 Hz), 2.45-2.31 (2H, m), 1.46-1.57 (4H, m), 1.37-1.24 (4H, m); <sup>13</sup>C-NMR (100 MHz, CDCl<sub>3</sub>) δ 196.7, 158.5, 158.3, 144.7, 142.8, 136.4, 126.8, 109.5, 109.2, 107.1, 103.4, 94.5, 94.4, 72.6, 58.4, 56.00, 55.98, 47.2, 44.6, 31.5, 29.4, 29.0, 28.6, 25.6; LR-MS (FAB) *m/z* 622 [M]<sup>+</sup>, 251 (100%); HR-MS (FAB) Calcd. for C<sub>32</sub>H<sub>46</sub>O<sub>10</sub>S: 622.2812, found: 622.2820.

### GO-Y187

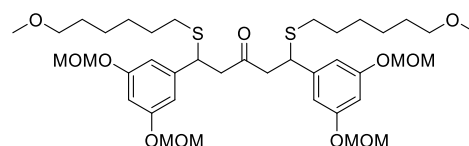

Colorless oil (diastereo mixture); IR (CHCl<sub>3</sub>): 2931, 1719, 1595, 1456 cm<sup>-1</sup>; <sup>1</sup>H-NMR (400 MHz, CDCl<sub>3</sub>) δ 6.64 (2H, d, *J* = 2.2 Hz), 6.62 (2H, d, *J* = 2.2 Hz), 6.60 (1H, t, *J* = 2.2 Hz), 6.58 (1H, t, *J* = 2.2 Hz), 5.16-5.09 (8H, m), 4.23-4.17 (2H, m), 3.47 (6H, s), 3.45 (6H, s), 3.35-3.32 (4H, m), 3.311 (3H, s), 3.306 (3H, s), 2.95-2.89 (2H, m), 2.85-2.78 (2H, m), 2.39-2.22 (4H, m), 1.54-1.43 (8H, m), 1.32-1.25 (8H, m); <sup>13</sup>C-NMR (100 MHz, CDCl<sub>3</sub>) δ (204.2, 204.1), (158.30, 158.26), (144.51, 144.46), (109.11, 109.05), (103.5, 103.4), 94.5, 72.7, 58.5, (56.10, 56.07), (49.98, 48.95), (43.94, 43.92), (31.5, 31.4), 29.5, 29.1, (28.7, 28.6), 25.7; LR-MS (FAB) *m/z* 783 [M+Na]<sup>+</sup>, 45 (100%); HR-MS (FAB) Calcd. for C<sub>39</sub>H<sub>62</sub>O<sub>11</sub>S<sub>2</sub>Na: 783.3816, found: 783.3812.

### GO-Y188

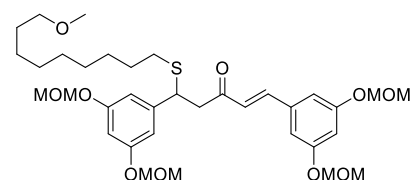

Colorless oil; IR (CHCl<sub>3</sub>): 2928, 1664, 1593, 1453 cm<sup>-1</sup>; <sup>1</sup>H-NMR (400 MHz, CDCl<sub>3</sub>) δ 7.42 (1H, d, *J* = 16.2 Hz), 6.86 (2H, d, *J* = 2.1 Hz), 6.77 (1H, t, *J* = 2.1 Hz), 6.73 (2H, d, *J* = 2.1 Hz), 6.64 (1H, d, *J* = 16.2 Hz), 6.61 (1H, t, *J* = 2.1 Hz), 5.16-5.11 (8H, m), 4.36 (1H, t, *J* = 7.2 Hz), 3.48 (6H, s), 3.46 (6H, s), 3.35 (2H, t, *J* = 6.5 Hz), 3.32 (3H, s), 3.16 (2H, d, *J* = 7.2 Hz), 2.44-2.30 (2H, m), 1.60-1.48 (6H, m), 1.33-1.23 (8H, m); <sup>13</sup>C-NMR (100 MHz, CDCl<sub>3</sub>) δ 196.8, 158.5, 158.3, 144.7, 142.8, 136.4, 126.8, 109.5, 109.2, 107.1, 103.4, 94.5, 94.4, 72.9, 58.5, 56.1, 56.0, 47.2, 44.6, 31.6, 29.6, 29.37, 29.35, 29.14, 29.06, 28.8, 26.0; LR-MS (FAB) *m/z* 664 [M]<sup>+</sup>, 251 (100%); HR-MS (FAB) Calcd. for C<sub>35</sub>H<sub>52</sub>O<sub>10</sub>S: 664.3281, found: 664.3277.

### GO-Y189

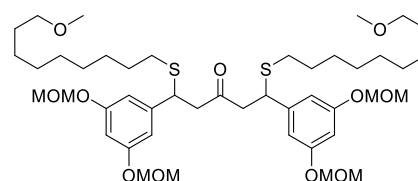

Colorless oil (diastereo mixture); IR (CHCl<sub>3</sub>): 2927, 2854, 1720, 1596, 1460 cm<sup>-1</sup>; <sup>1</sup>H-NMR (600 MHz, CDCl<sub>3</sub>) δ 6.64 (2H, d, *J* = 2.1 Hz), 6.62 (2H, d, *J* = 2.1 Hz), 6.60 (1H, t, *J* = 2.1 Hz), 6.58 (1H, t, *J* = 2.1 Hz), 5.16-5.10 (8H, m), 4.22-4.18 (2H, m), 3.47 (6H, s), 3.46 (6H, s), 3.354 (2H, t, *J* = 6.5 Hz), 3.351 (2H, t, *J* = 6.8 Hz), 3.33 (3H, s), 3.32 (3H, s), 2.94-2.90 (2H, m), 2.85-2.78 (2H, m), 2.37-2.23 (4H, m), 1.57-1.50 (4H, m), 1.49-1.40 (4H, m), 1.30-1.23 (20H, m); <sup>13</sup>C-NMR (150 MHz, CDCl<sub>3</sub>) δ (204.24, 204.18), (158.32, 158.28), (144.6, 144.5), (109.14, 109.09), (103.50, 103.46), 94.6, 72.9, 58.5, (56.12, 56.10), (50.10, 49.97), (44.0, 43.9), (31.6, 31.5), (29.6, 29.4, 29.18, 29.16, 29.13,

28.88, 28.86, 26.1, seven carbon); LR-MS (FAB)  $m/z$  823  $[M-OMe]^+$ , 251 (100%); HR-MS (FAB) Calcd. for  $C_{44}H_{71}O_{10}S_2$ : 823.4489, found: 823.4495.

#### Data of other

##### 1,2-Bis(4-methoxybutyl)disulfane (**S2c**)

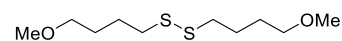

Colorless oil; IR ( $CHCl_3$ ): 2927, 2864, 1449, 1386, 1119  $cm^{-1}$ ;  $^1H$ -NMR (400 MHz,  $CDCl_3$ )  $\delta$  3.37 (4H, t,  $J = 6.3$  Hz), 3.33 (6H, s), 2.71 (4H, t,  $J = 7.2$  Hz), 1.80-1.64 (8H, m);  $^{13}C$ -NMR (100 MHz,  $CDCl_3$ )  $\delta$  72.2, 58.5, 38.8, 28.4, 25.9; LR-MS (EI)  $m/z$  238  $[M]^+$ , 87 (100%); HR-MS (EI) Calcd. for  $C_{10}H_{22}O_2S_2$ : 238.1061, found: 238.1061.

##### 1,2-Bis(6-methoxyhexyl)disulfane (**S3c**)

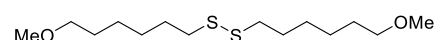

Colorless oil; IR ( $CHCl_3$ ): 2929, 2857, 1460, 1387, 1119  $cm^{-1}$ ;  $^1H$ -NMR (400 MHz,  $CDCl_3$ )  $\delta$  3.37 (4H, t,  $J = 6.9$  Hz), 3.33 (6H, s), 2.68 (4H, t,  $J = 7.1$  Hz), 1.69 (4H, quint,  $J = 6.9$  Hz), 1.58 (4H, quint,  $J = 7.1$  Hz), 1.45-1.36 (8H, m);  $^{13}C$ -NMR (100 MHz,  $CDCl_3$ )  $\delta$  72.7, 58.5, 39.0, 29.4, 29.1, 28.3, 25.7; LR-MS (EI)  $m/z$  294  $[M]^+$ , 83 (100%); HR-MS (EI) Calcd. for  $C_{14}H_{30}O_2S_2$ : 294.1687, found: 294.1668.

##### 1,2-Bis(9-methoxynonyl)disulfane (**S4c**)

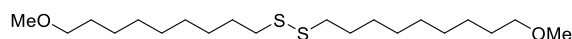

Colorless oil; IR ( $CHCl_3$ ): 2926, 2854, 1462, 1120  $cm^{-1}$ ;  $^1H$ -NMR (400 MHz,  $CDCl_3$ )  $\delta$  3.37 (4H, t,  $J = 6.9$  Hz), 3.33 (6H, s), 2.68 (4H, t,  $J = 7.1$  Hz), 1.69 (4H, quint,  $J = 6.9$  Hz), 1.58 (4H, quint,  $J = 7.1$  Hz), 1.45-1.25 (20H, m);  $^{13}C$ -NMR (100 MHz,  $CDCl_3$ )  $\delta$  72.9, 58.5, 39.2, 29.6, 29.41, 29.39, 29.2, 29.1, 28.5, 26.1; LR-MS (EI)  $m/z$  378 ( $[M]^+$ , 100%); HR-MS (EI) Calcd. for  $C_{20}H_{42}O_2S_2$ : 378.2626, found: 378.2621.

## Experimental Procedure for $^1\text{H-NMR}$ studies

### $^1\text{H-NMR}$ study to monitor Michael reaction between GO-Y030 and cysteamine (Figure 2a)

GO-Y030 (5.27 mg, 0.011 mmol) was dissolved with  $\text{DMSO-}d_6$  (0.55 ml) and cysteamine (5.84 mg, 0.075 mmol) was dissolved with  $\text{DMSO-}d_6$  (0.95 ml) in screw vial prior to use. The resulting cysteamine solution (0.55 ml of 0.08 M solution in  $\text{DMSO-}d_6$ , 0.044 mmol) was added to GO-Y030 solution (0.55 ml of 0.02 M in  $\text{DMSO-}d_6$ , 0.11 mmol). After 5 min, a proton NMR spectrum of the resulting solution was measured. Then, the solution was got back to screw vial and it stand under air. After 1 h the addition of cysteamine, a proton NMR spectrum of the resulting solution was measured. Then, the solution was got back to screw vial and it stand under air. After 6 h the addition of cysteamine, a proton NMR spectrum of the resulting solution was measured.

### Experimental Procedure for Analysis to Monitor retro-Michael reaction

The assay was performed in 96 well plates and alumifoils were used to cover the plate during the measurements. All measurements were done in a Multiscan Spectrum Photometer (Thermo, Finland) at 25 °C. Before the assay, 10 mM stock solutions of GO-Y030 and GO-Y030-bis-thiol-adducts (or GO-Y030-mono-thiol-adduct) in DMSO were diluted with DMSO to give a concentration of 83  $\mu\text{M}$ . The resultant 83  $\mu\text{M}$  compounds DMSO solution (100  $\mu\text{l}$ ) were added to each well in 96 well plate. Setted well were diluted with (a) 100 mM Glycine-HCl buffer (100  $\mu\text{l}$ ), (b) PBS buffer (100  $\mu\text{l}$ ), (c) 100 mM Tris-HCl buffer (100  $\mu\text{l}$ ), and (d)  $\text{H}_2\text{O}$ .

Then, the kinetic measurement is started immediately. The wells were covered with foil and measurements were done in duplicates.



UV spectra of GO-Y030 and GO-Y030-bis-thiol-adducts after diluted with pH 3 glycine-HCl buffer (Figure S1)

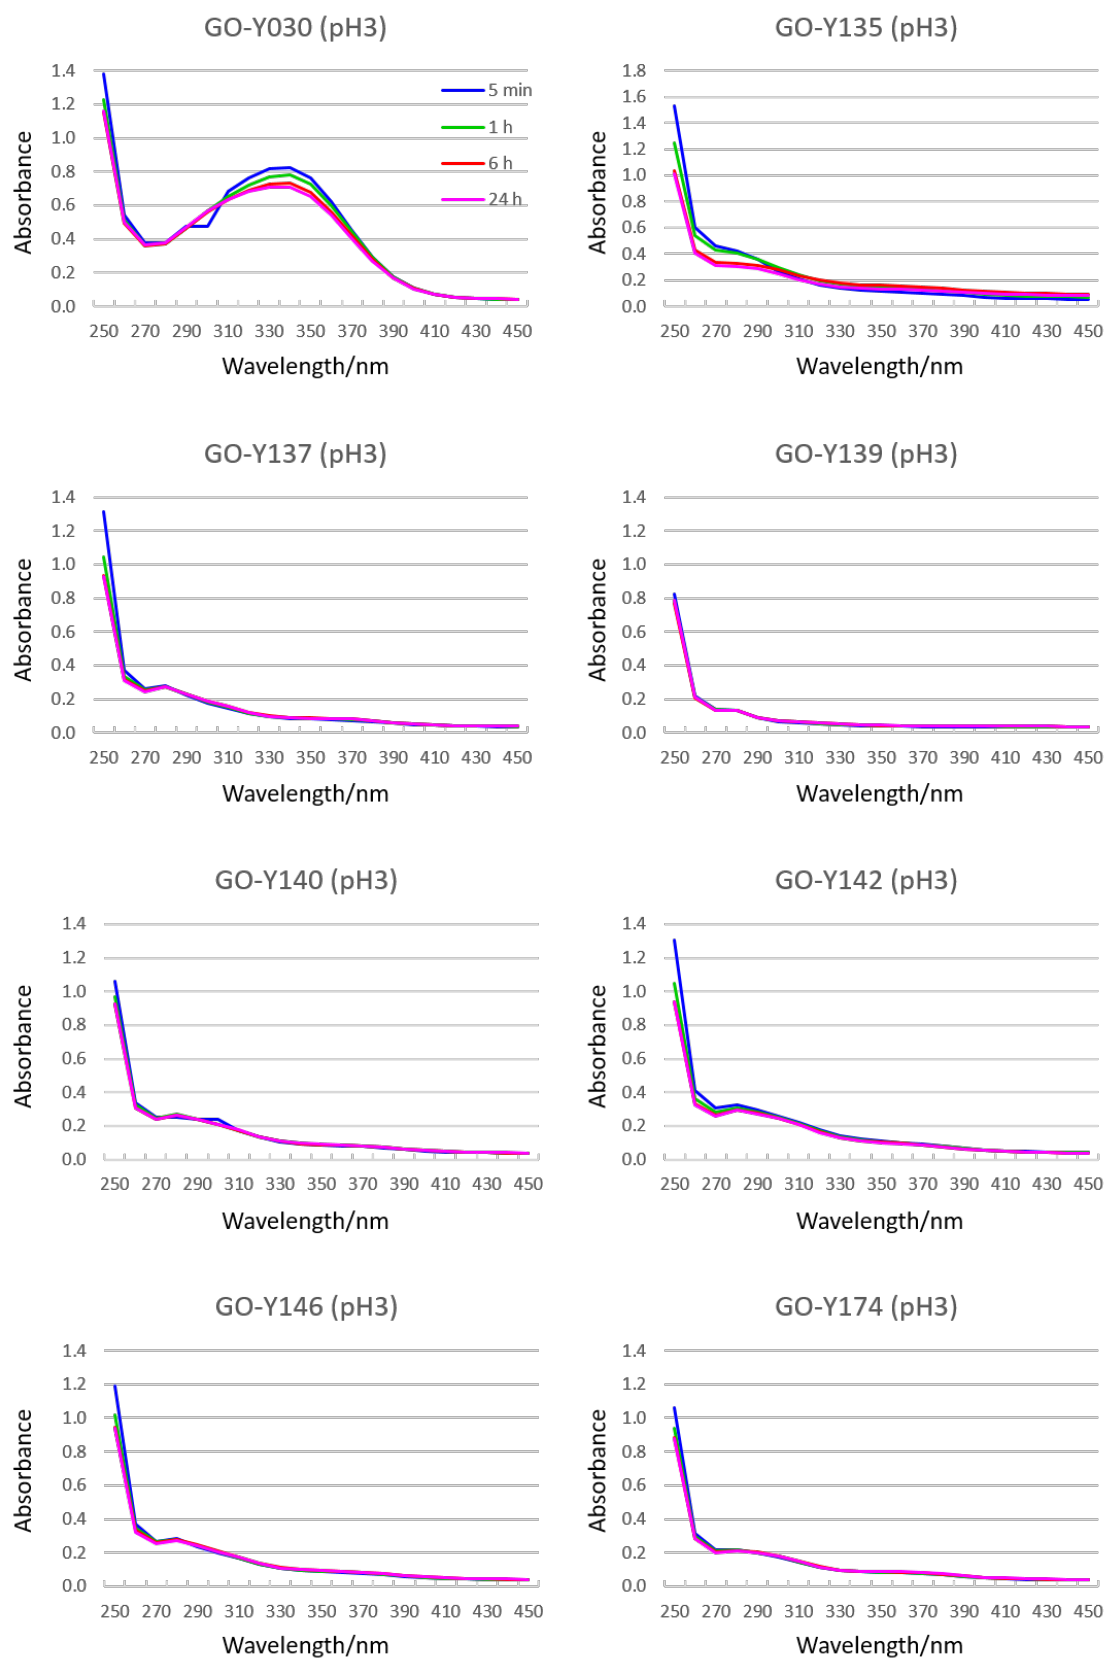

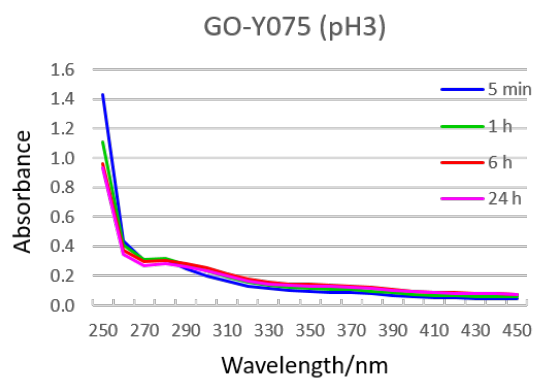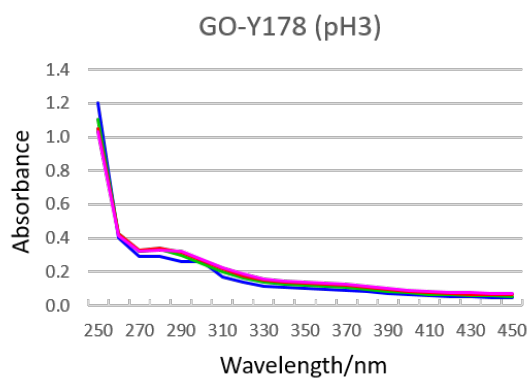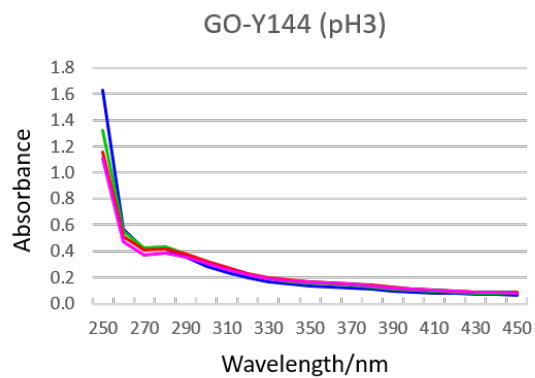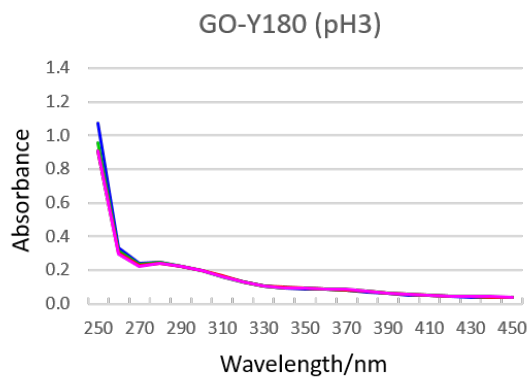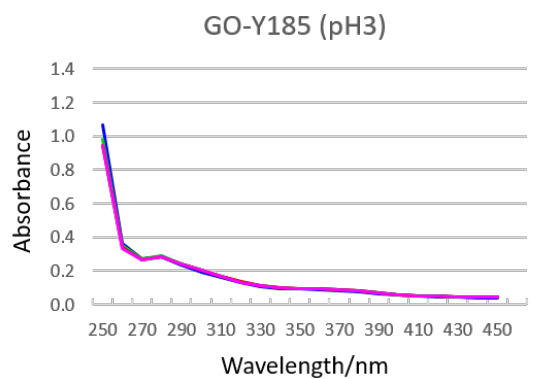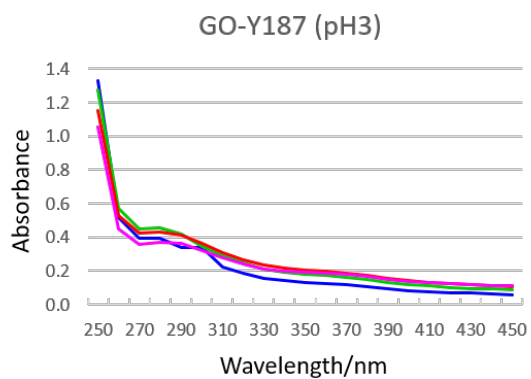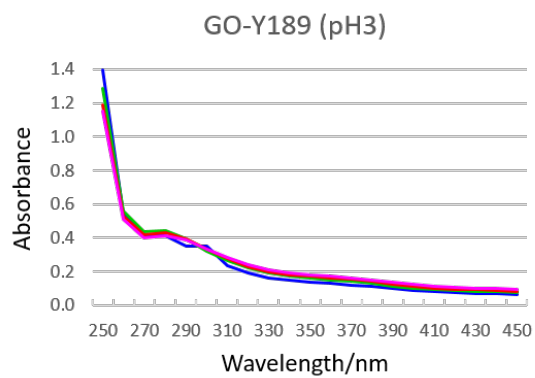

## UV spectra of GO-Y030-bis-thiol-adducts after diluted with pH 7.3 phosphate buffer (Figure S2)

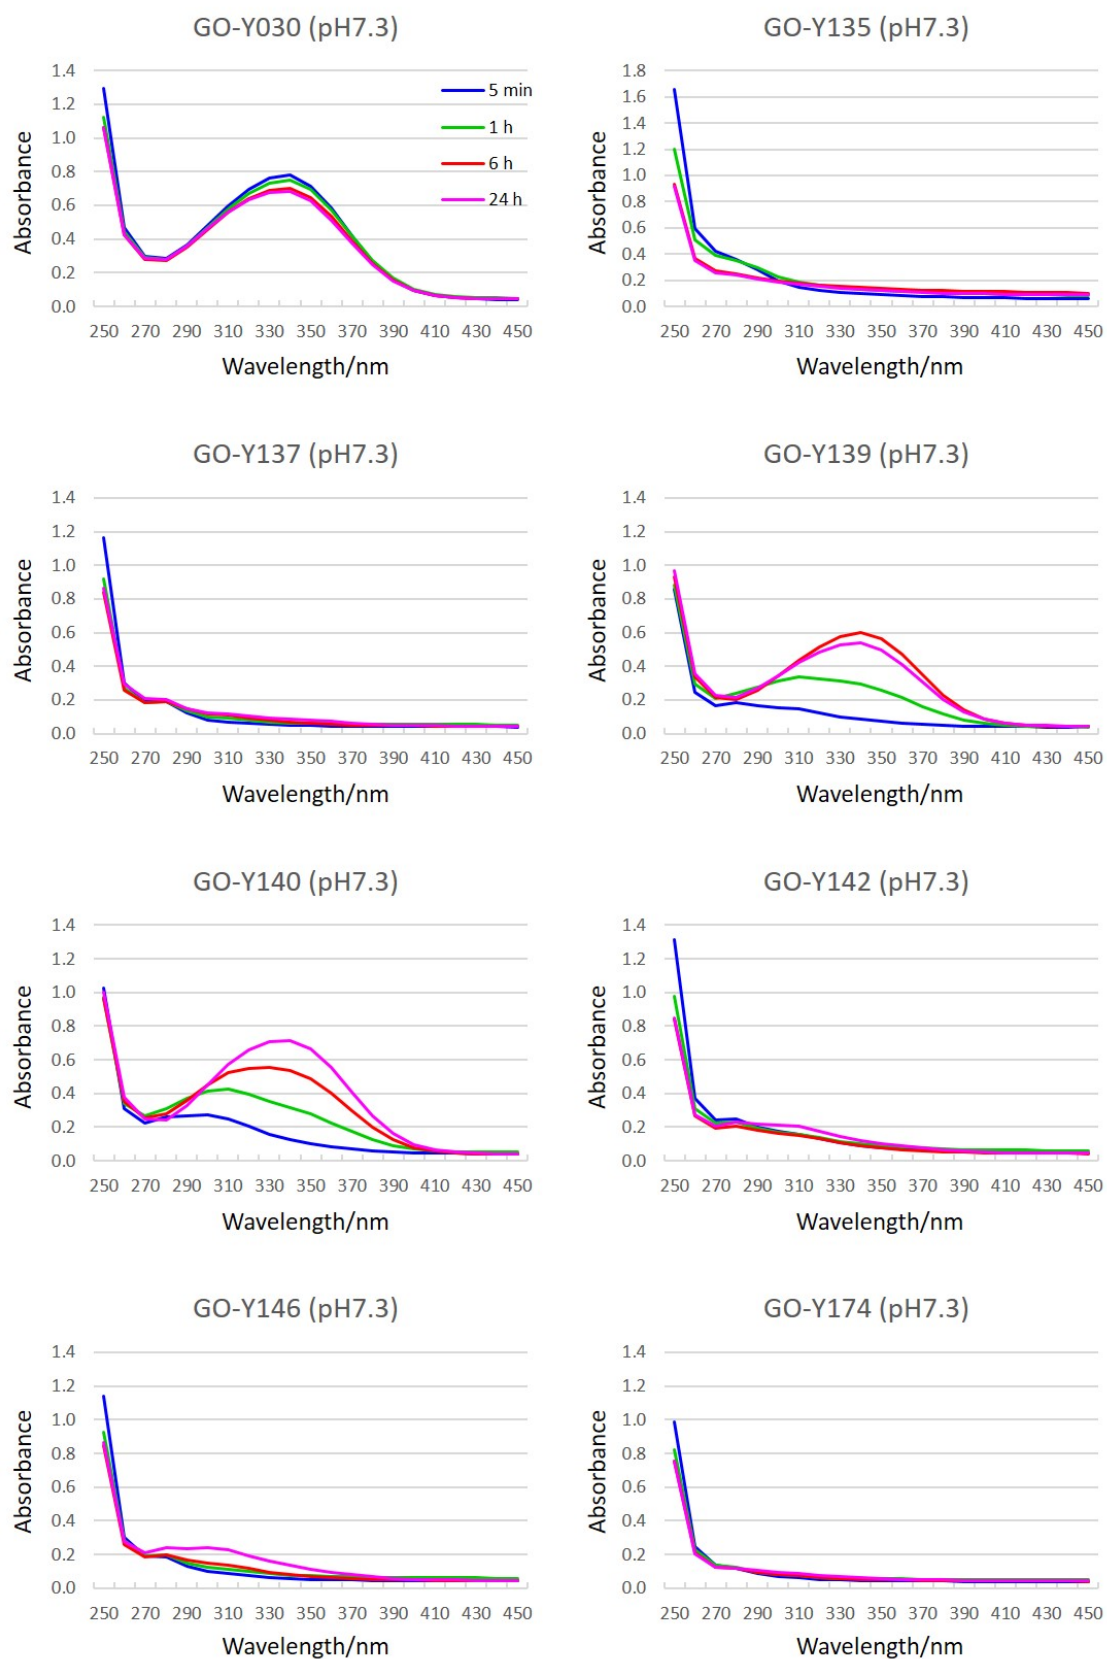

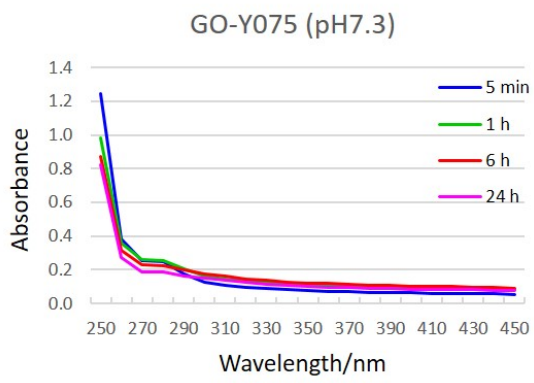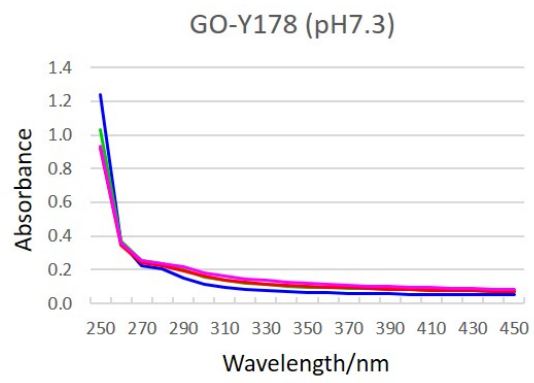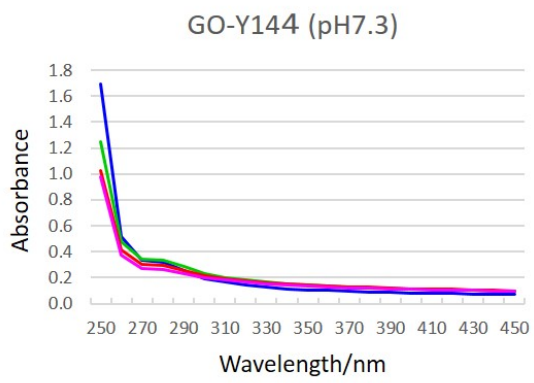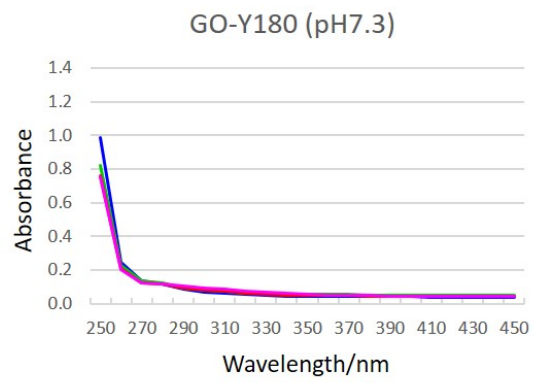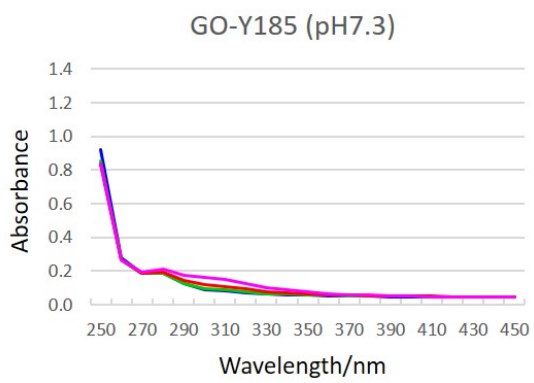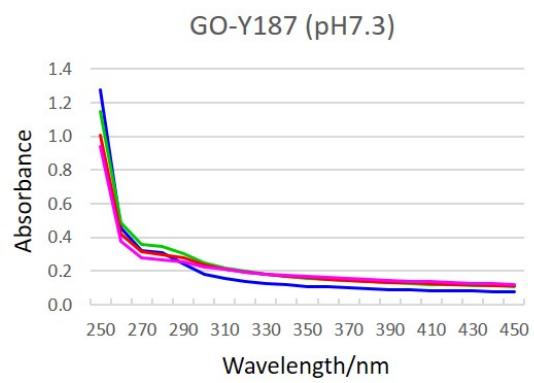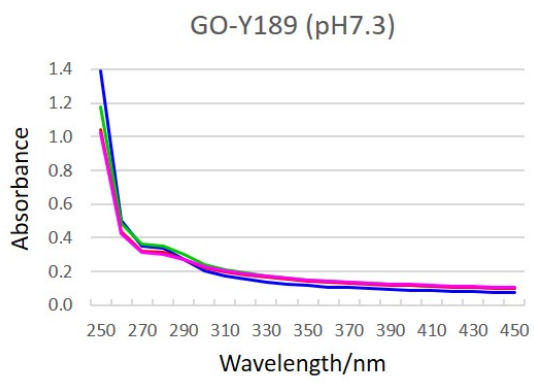

### UV spectra of GO-Y030-bis-thiol-adducts after diluted with pH 8.5 Tris-HCl buffer (Figure S3)

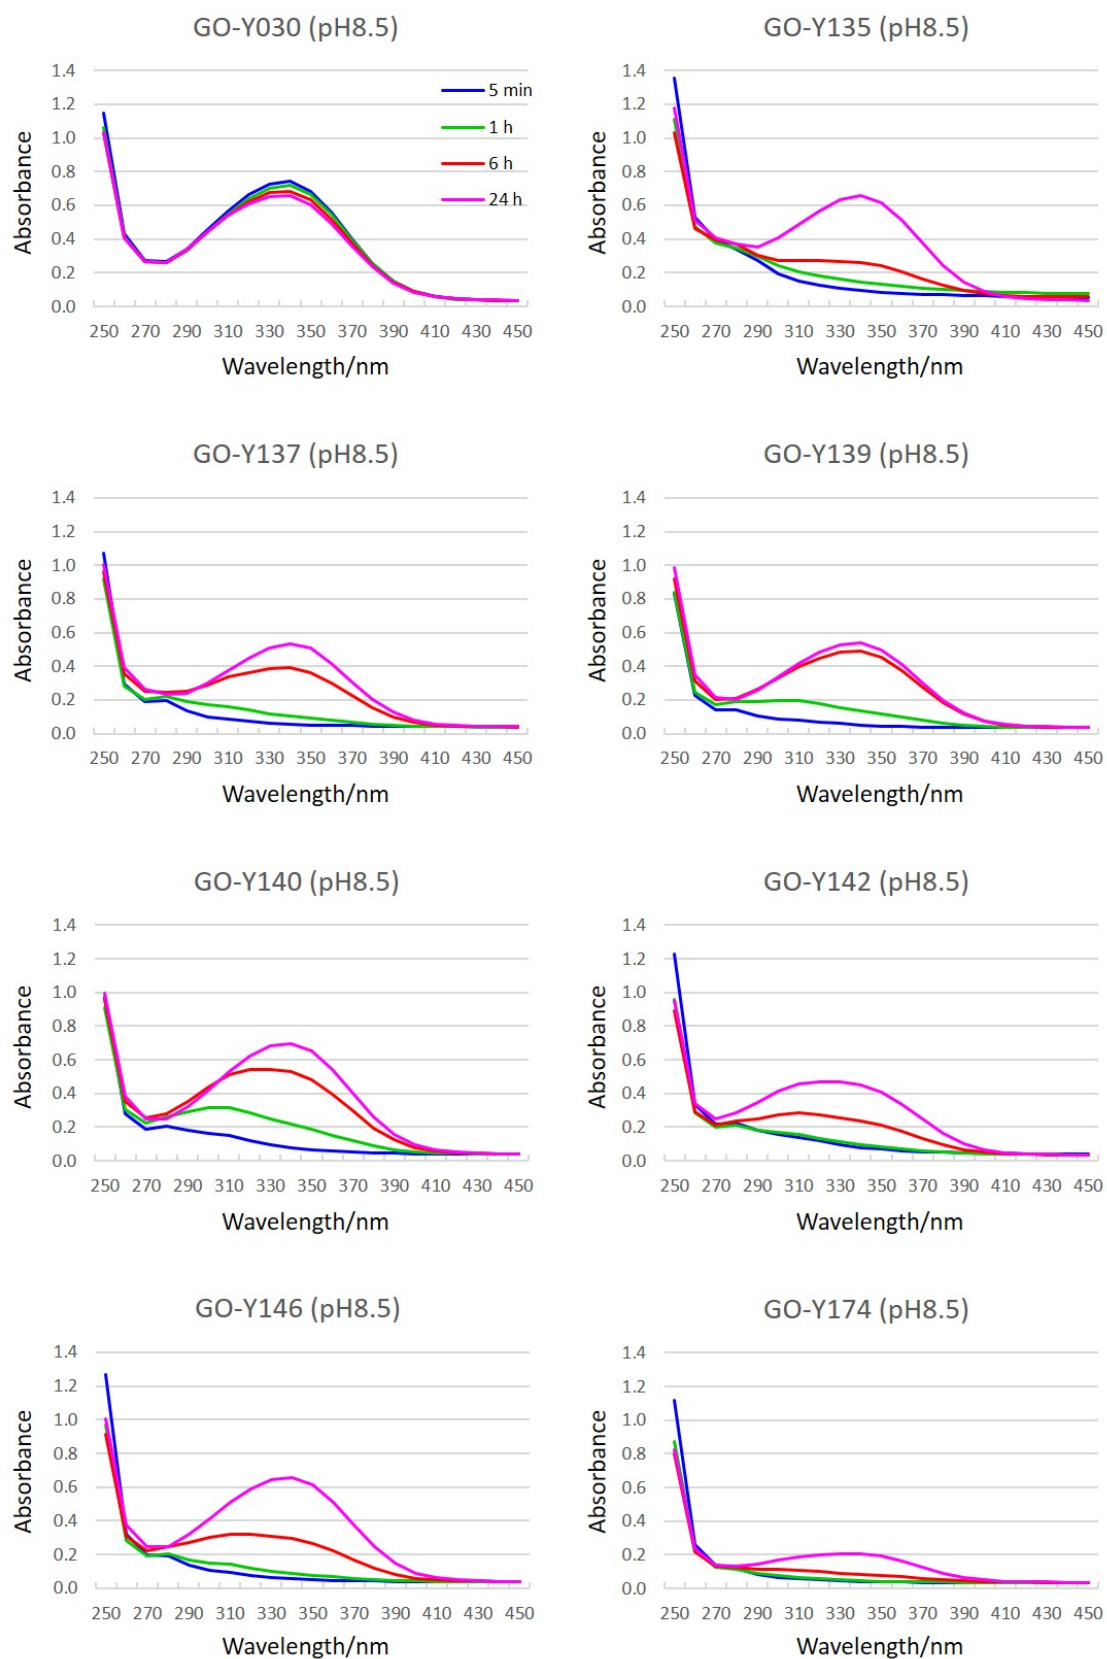

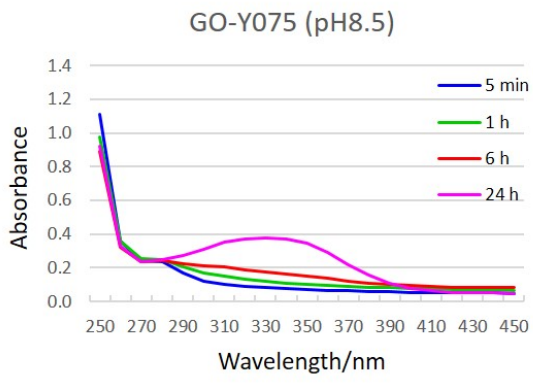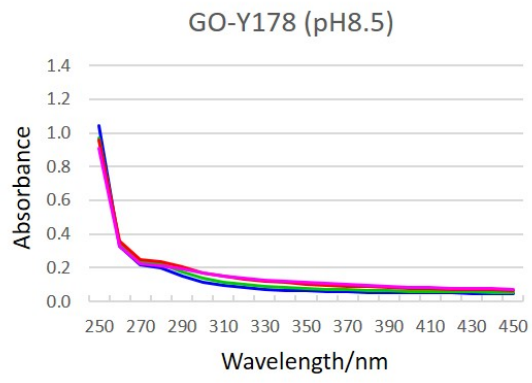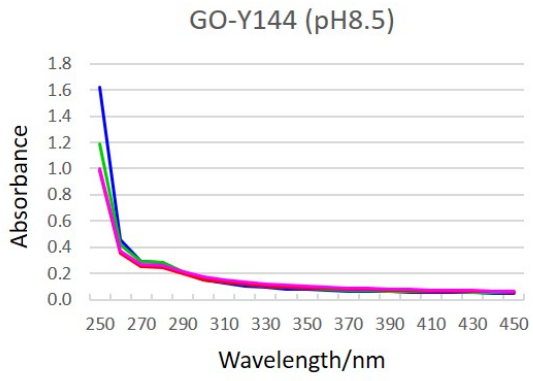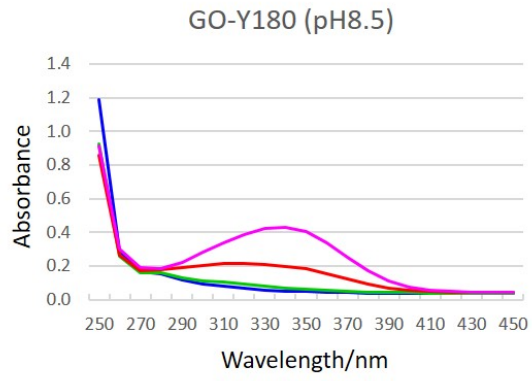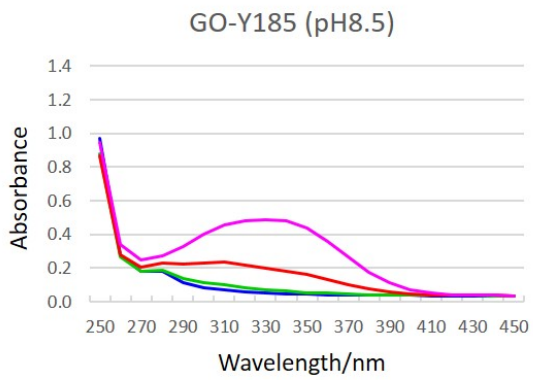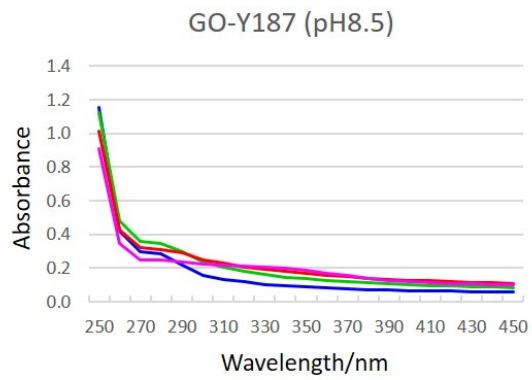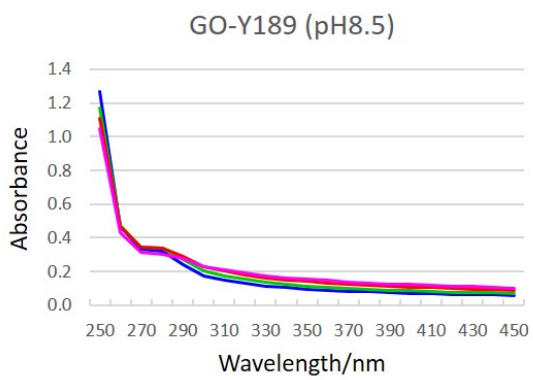

**Δ Absorbance at 340 nm after diluted with pH 3 glycine-HCl buffer (Figure S4)**

**–GO-Y030-bis-thiol-adducts–**

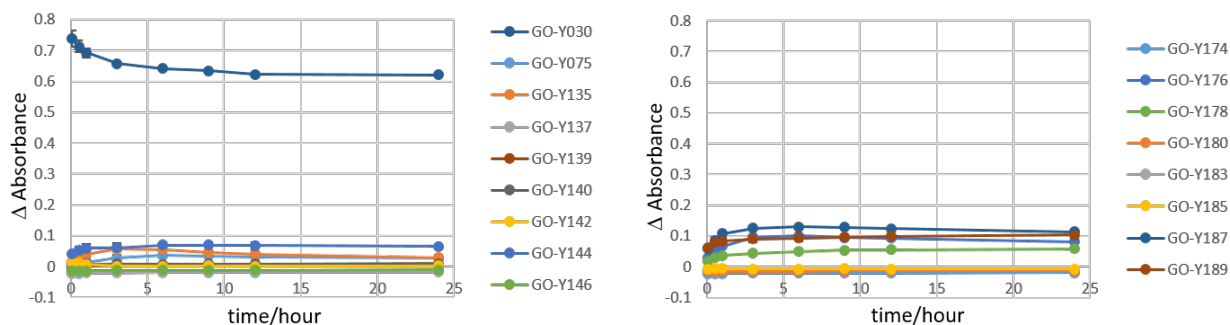

**Δ Absorbance at 340 nm after diluted with pH 7.3 phosphate buffer (Figure S5)**

**–GO-Y030-bis-thiol-adducts–**

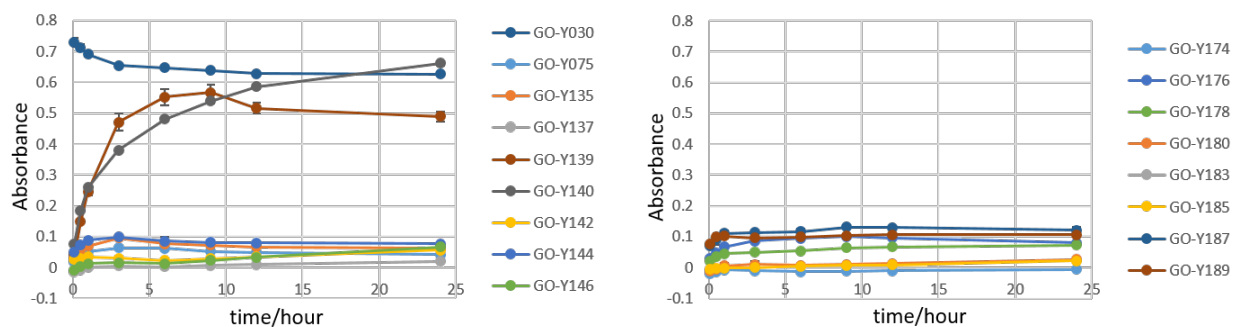

**Δ Absorbance at 340 nm after diluted with pH 8.5 Tris-HCl buffer (Figure S6)**

**–GO-Y030-bis-thiol-adducts–**

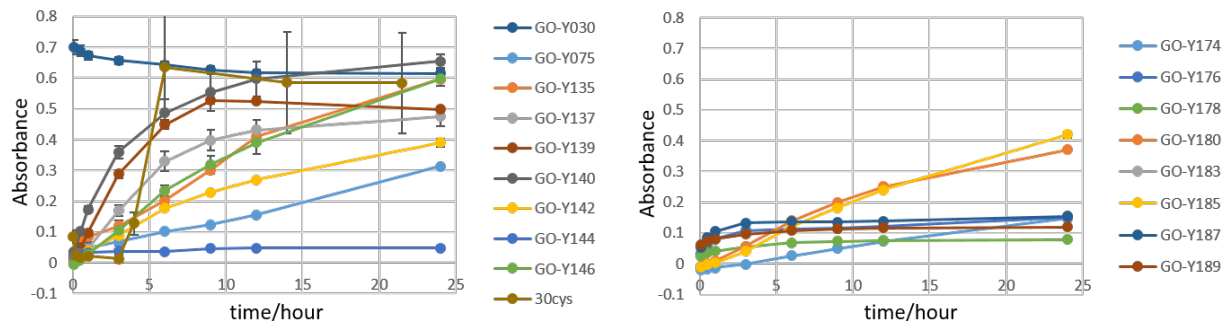

## UV spectra of GO-Y030-mono-thiol-adducts (Figure S7)

This graph shows that any mono-adducts assessed has  $\lambda_{\text{max}}$  at 300~310 nm. Given this information, it is considered that another mono-adducts has also  $\lambda_{\text{max}}$  at 300~310 nm is widely.

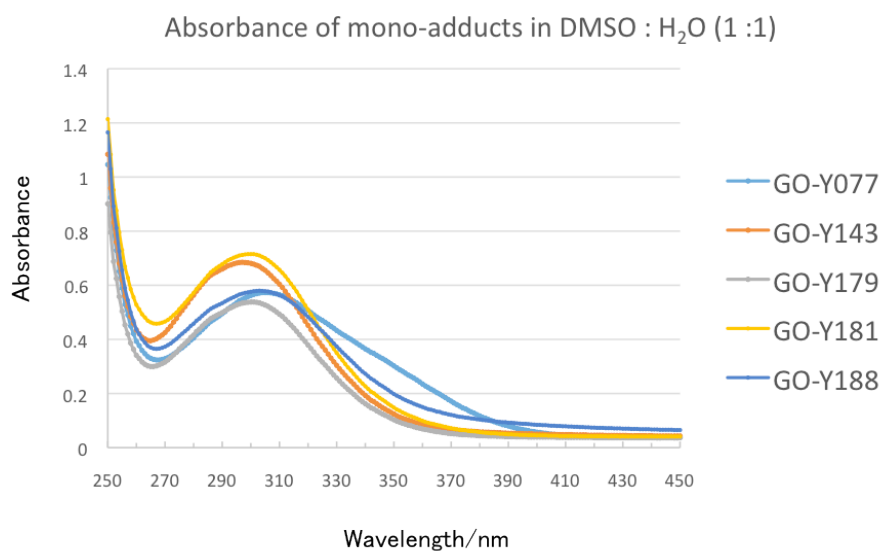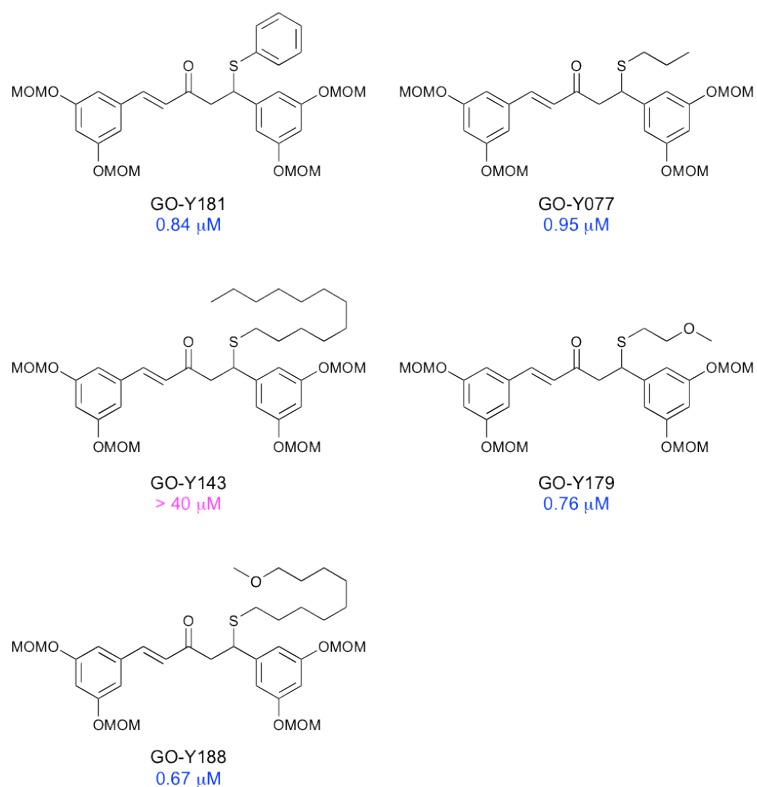



**UV spectra of GO-Y030-mono-thiol-adducts after diluted with pH 3 glycine-HCl buffer  
(Figure S8)**

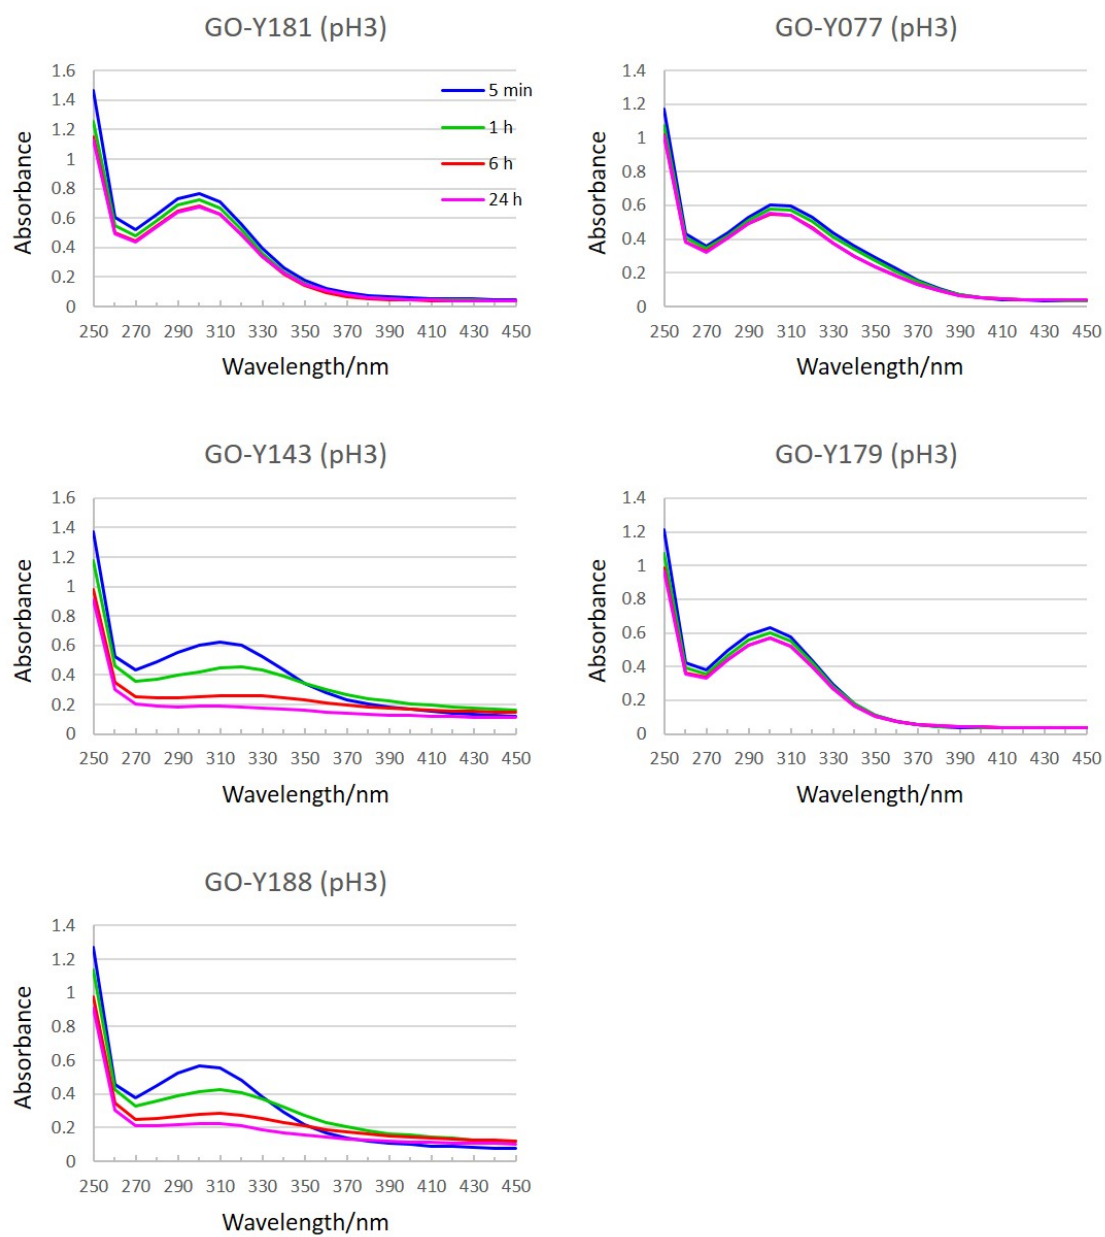

**UV spectra of GO-Y030-mono-thiol-adducts after diluted with pH 7.3 phosphate buffer  
(Figure S9)**

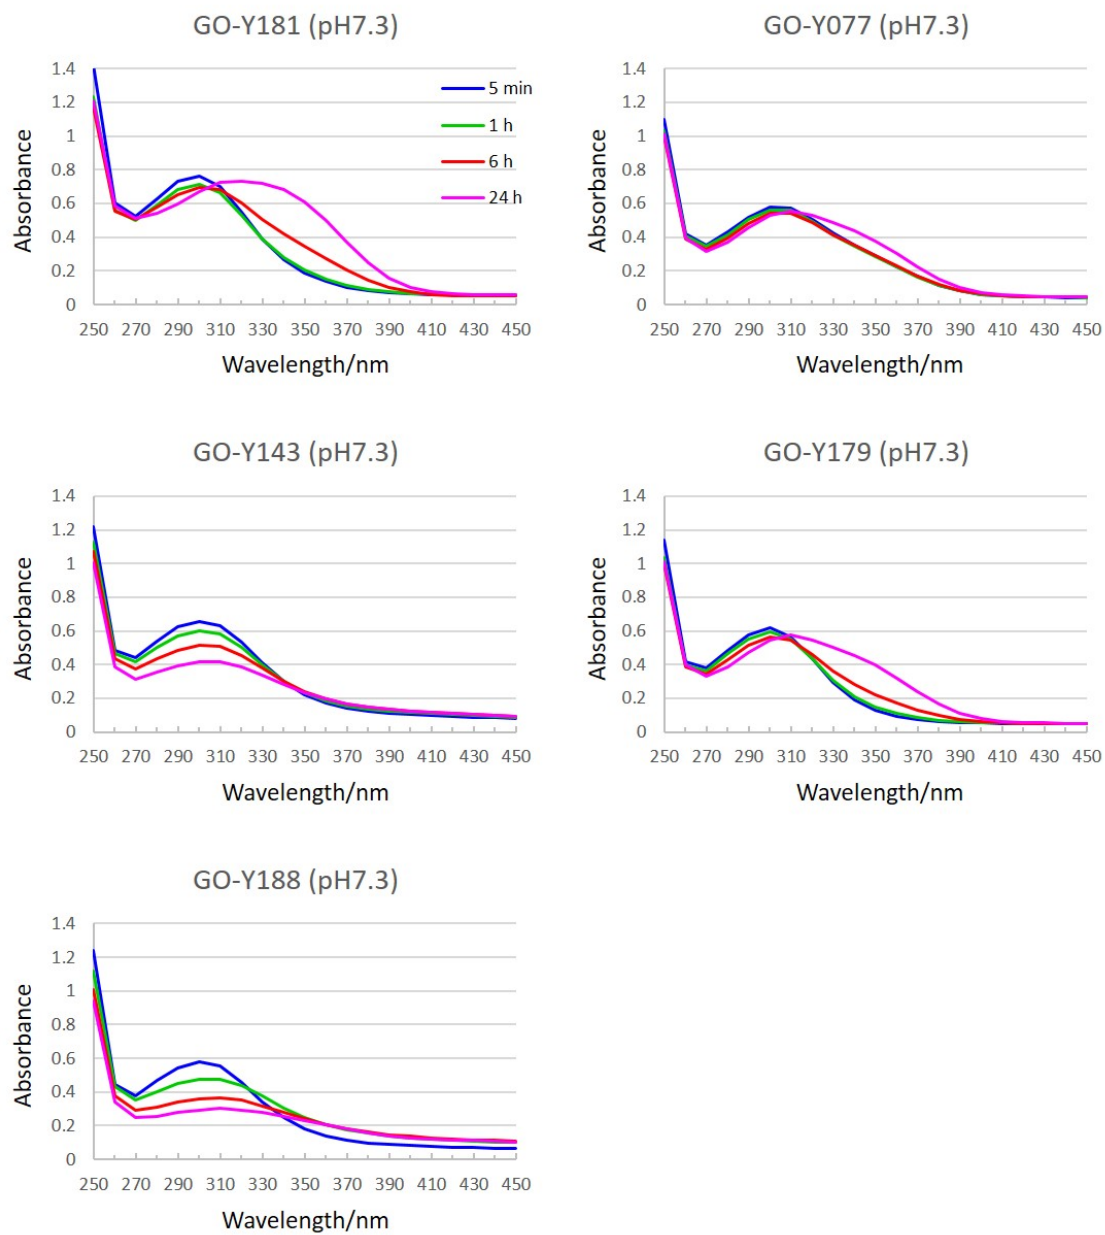

**UV spectra of GO-Y030-mono-thiol-adducts after diluted with pH 8.5 Tris-HCl buffer  
(Figure S10)**

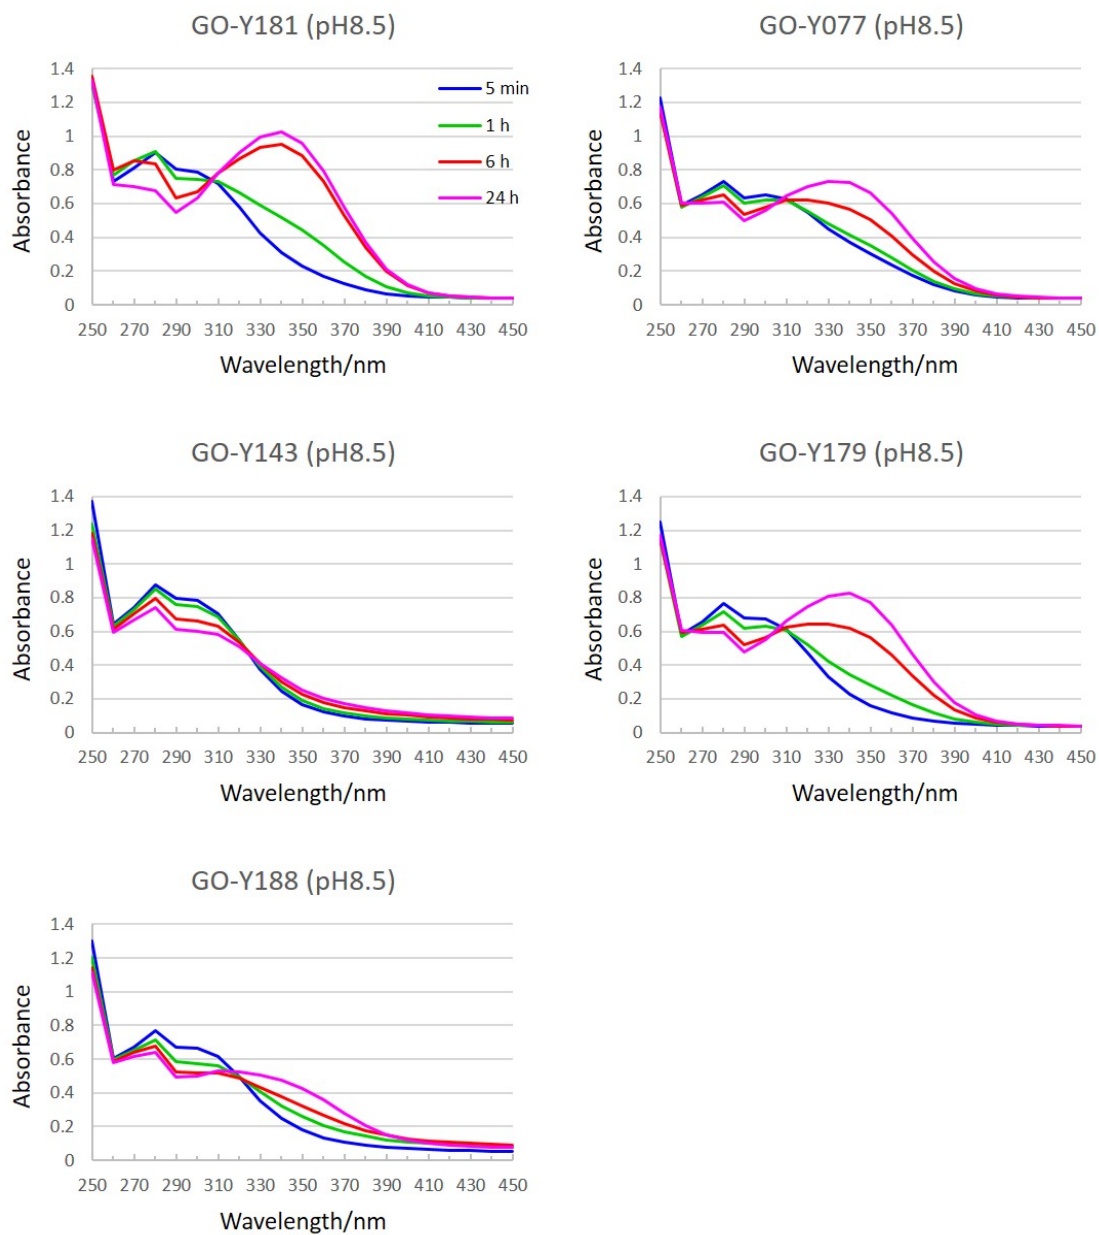

**$\Delta$  Absorbance at 340 nm after diluted with pH 3 glycine-HCl buffer (Figure S11)**

**–GO-Y030-mono-thiol-adducts–**

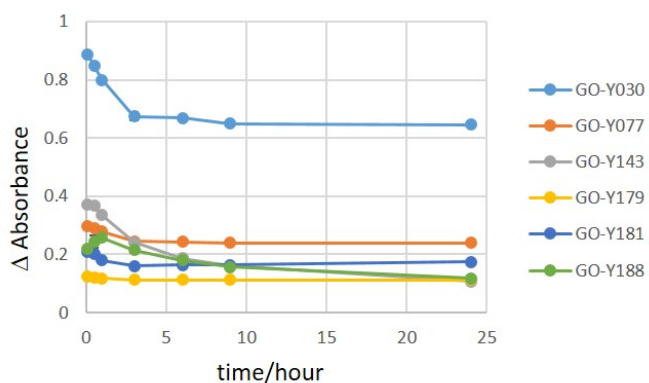

**$\Delta$  Absorbance at 340 nm after diluted with pH 7.3 phosphate buffer (Figure S12)**

**–GO-Y030-bis-thiol-adducts–**

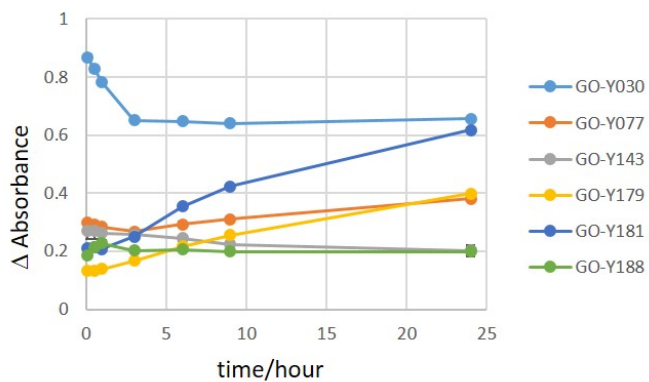

**$\Delta$  Absorbance at 340 nm after diluted with pH 8.5 Tris-HCl buffer (Figure S13)**

**–GO-Y030-bis-thiol-adducts–**

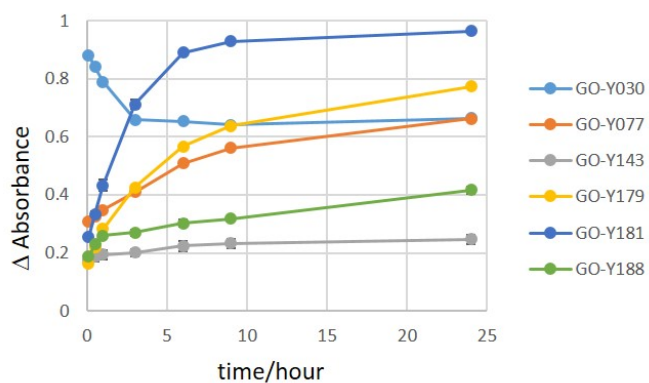

## ClogP value predicted by ChemDraw (Table S1)

| HSR                                                                                 | Mono adduct | ClogP | IC <sub>50</sub> (μM) | Bis adduct | ClogP | IC <sub>50</sub> (μM) |
|-------------------------------------------------------------------------------------|-------------|-------|-----------------------|------------|-------|-----------------------|
|    | GO-Y181     | 5.14  | 0.84                  | GO-Y135    | 6.68  | 0.92                  |
|    | GO-Y136     | 3.33  | 0.89                  | GO-Y137    | 3.22  | 0.97                  |
|    | GO-Y138     | 2.39  | 0.72                  | GO-Y139    | 1.33  | 0.56                  |
|    | -           | -     | -                     | GO-Y140    | -3.24 | 0.98                  |
|    | GO-Y141     | 4.70  | 0.91                  | GO-Y142    | 5.96  | 0.84                  |
|    | GO-Y145     | 2.79  | 0.99                  | GO-Y146    | 2.13  | 1.0                   |
|    | GO-Y173     | 4.70  | 1.0                   | GO-Y174    | 5.56  | 0.72                  |
|  | GO-Y077     | 5.23  | 0.82                  | GO-Y075    | 6.62  | 2.0                   |
|  | GO-Y177     | 6.82  | 0.92                  | GO-Y178    | 9.79  | > 40                  |
|  | GO-Y143     | 9.99  | > 40                  | GO-Y144    | 16.1  | > 40                  |
|  | GO-Y179     | 3.98  | 0.34                  | GO-Y180    | 4.12  | 0.72                  |
|  | GO-Y184     | 4.49  | 0.34                  | GO-Y185    | 5.13  | 0.76                  |
|  | GO-Y186     | 5.55  | 0.42                  | GO-Y187    | 7.25  | 0.78                  |
|  | GO-Y188     | 7.13  | 0.67                  | GO-Y189    | 10.4  | > 40                  |

**The solubility of GO-Y030 and GO-Y140 (Figure S14)**

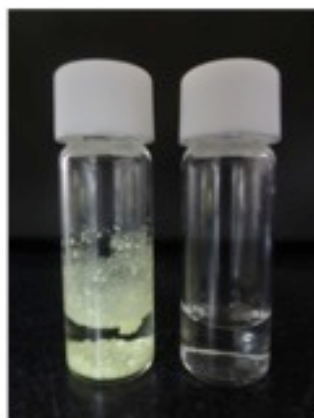

GO-Y030    GO-Y140

30 mg in  
pH 8 PBS buffer (1 mL)

## **Experimental Procedure for Biological Analysis**

### **Cell culture**

Cells of the colorectal carcinoma line HCT116 were cultured in RPMI1640 supplemented with 10% fetal bovine serum (FBS).

### **Cell growth suppression analysis**

HCT116 was obtained from the Cell Resource Center for Biomedical Research (Institute of Development, Aging and Cancer, Tohoku University, Sendai, Japan). The growth-suppressive effects of the compounds were measured for 48 h. Cell viability was assayed by quantitation of the uptake and digestion of 2-(2-methoxy-4-nitrophenyl)-3-(4-nitrophenyl)-5-(2,4-disulfophenyl)-2*H*- tetrazolium monosodium salt (WST-8) according to the manufacturer's instructions (Dojindo Laboratories, Kumamoto, Japan) by using a 96-well plate reader, SpectraMax M2e (Molecular Devices). The percentage cell growth of the control, which was treated with 0.5% DMSO alone, was calculated and plotted, and then the mean growth inhibitory concentration (GI<sub>50</sub>) value was determined.

GO-Y077-1H

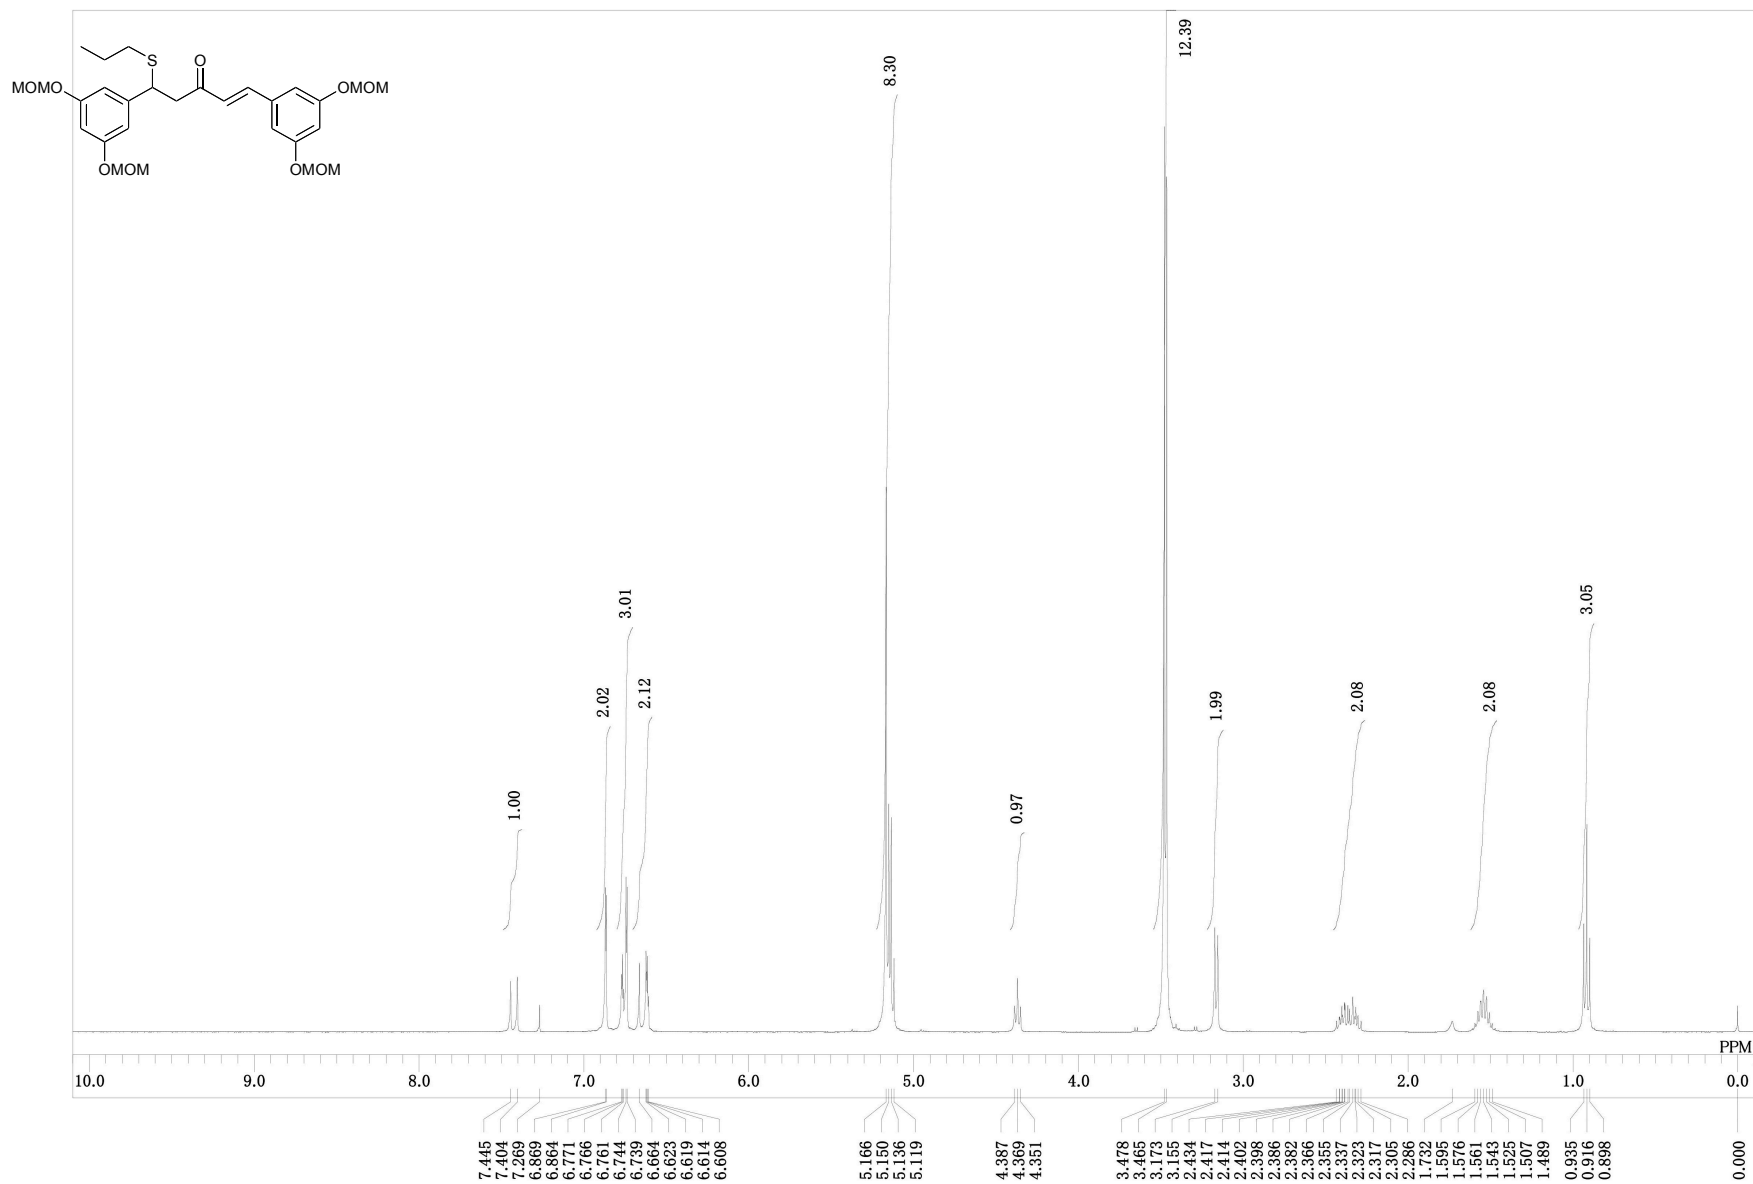



GO-Y077-13C

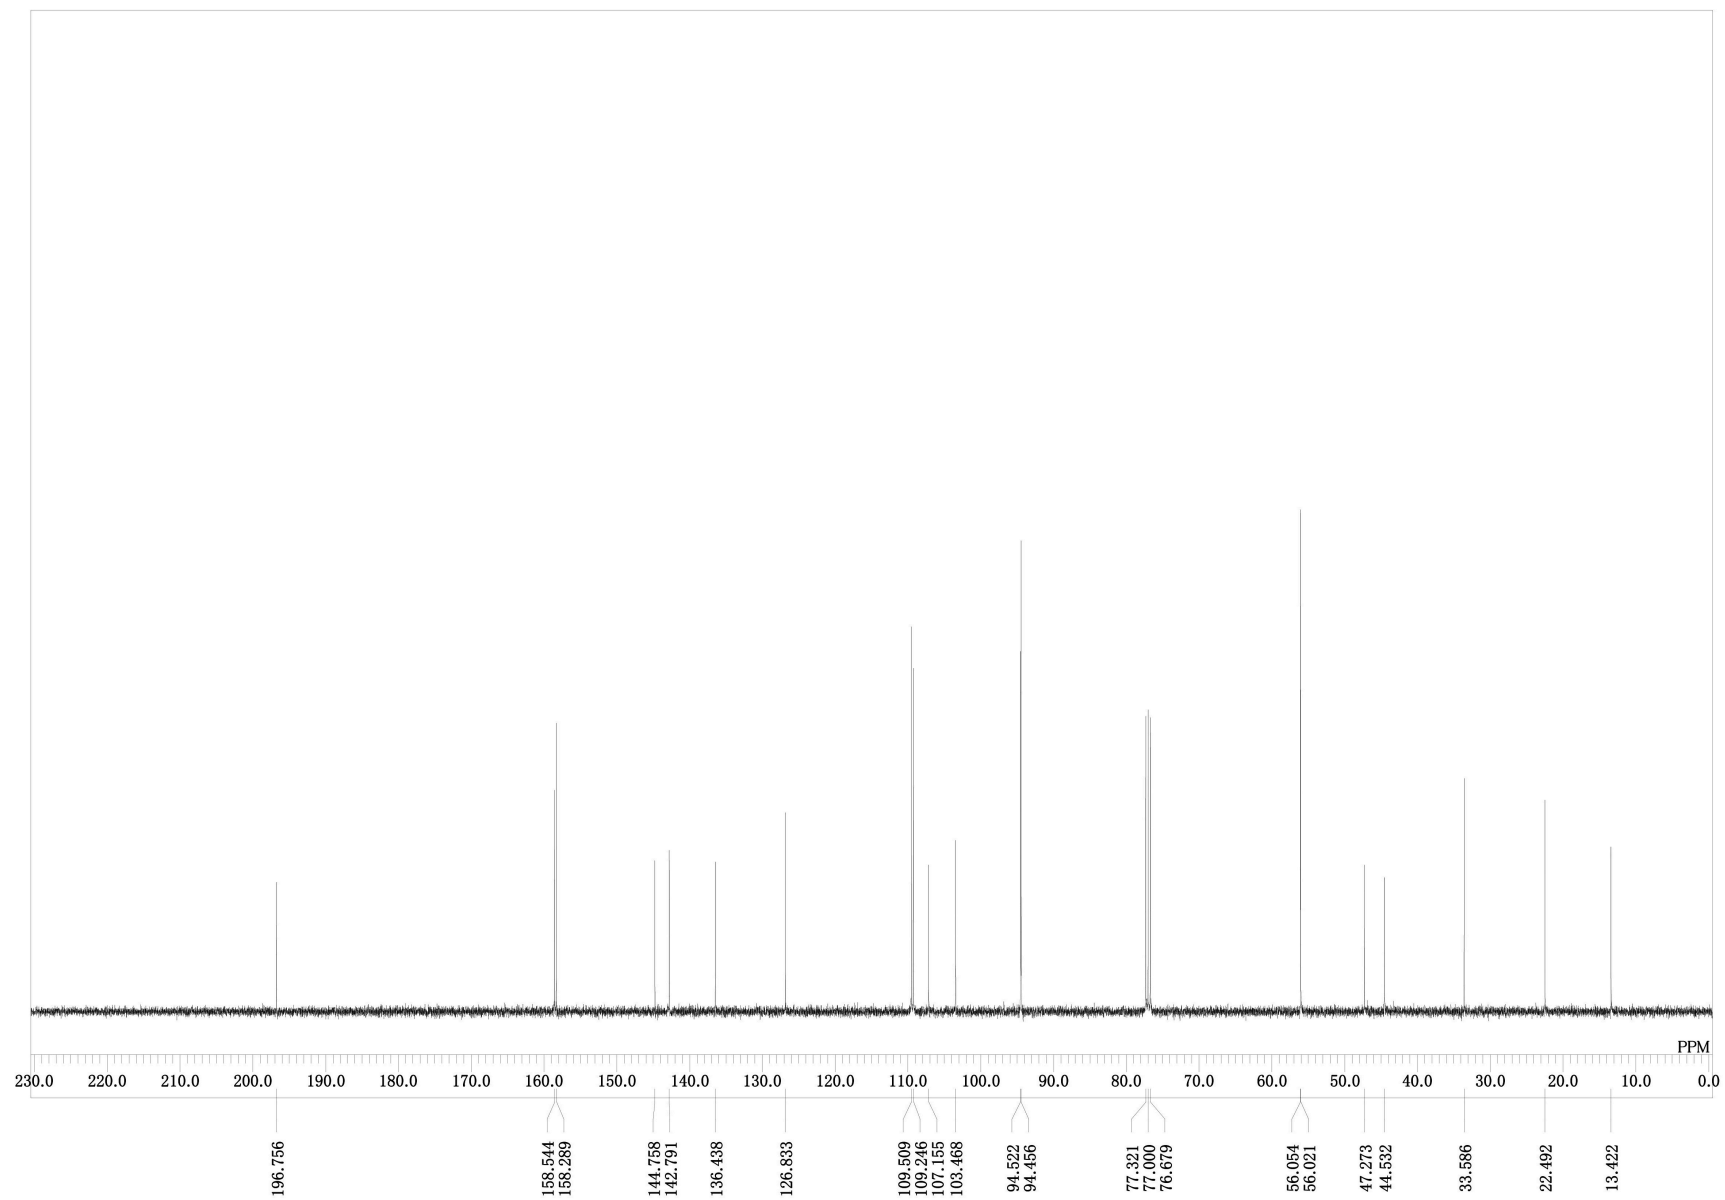

GO-Y075-1H

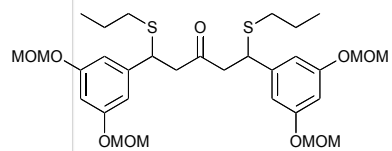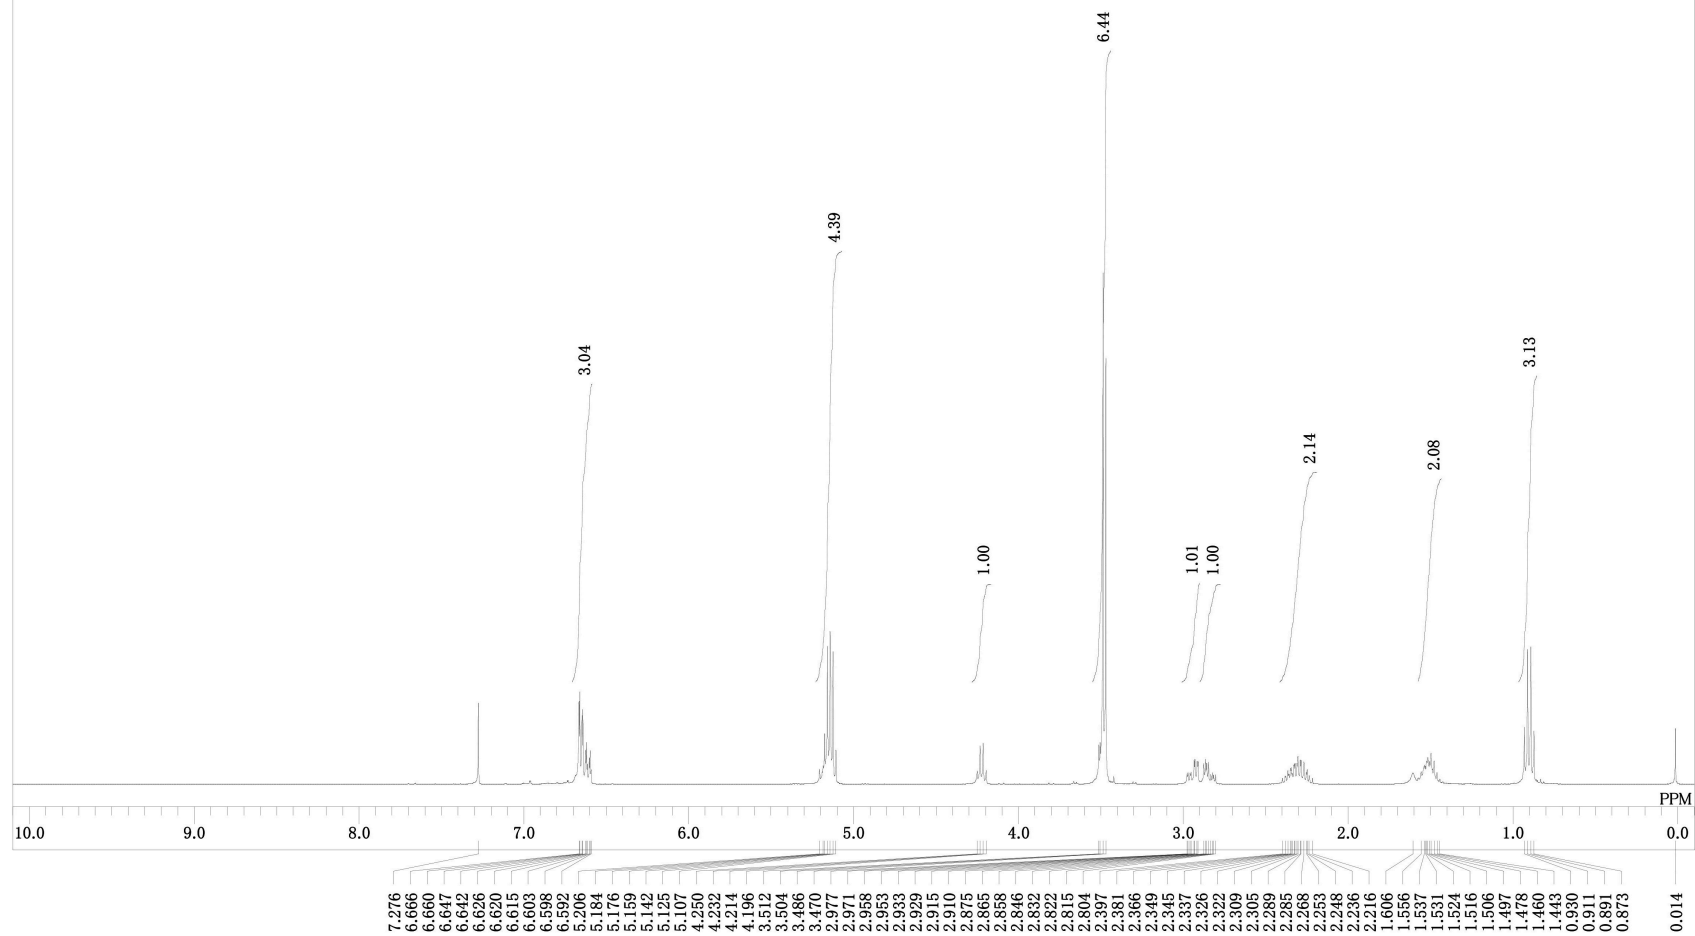

GO-Y075-13C

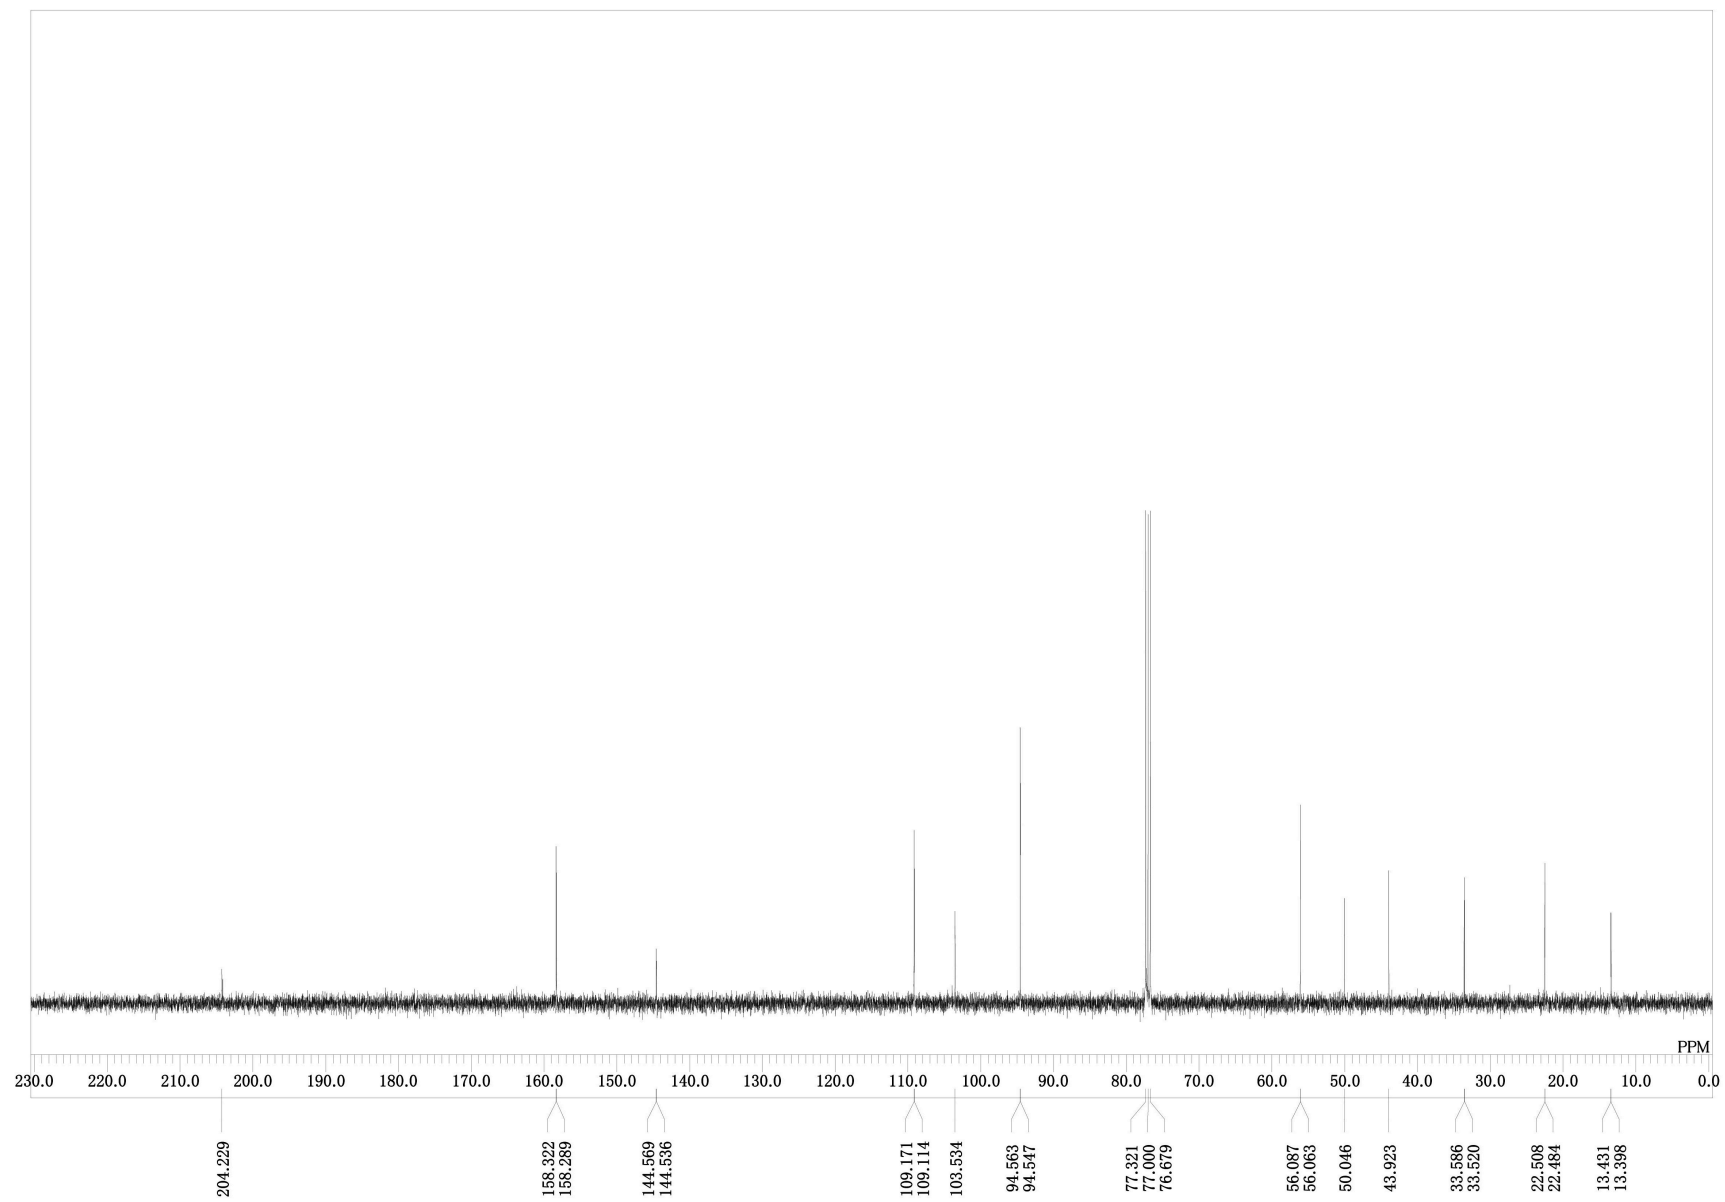

GO-Y181-1H

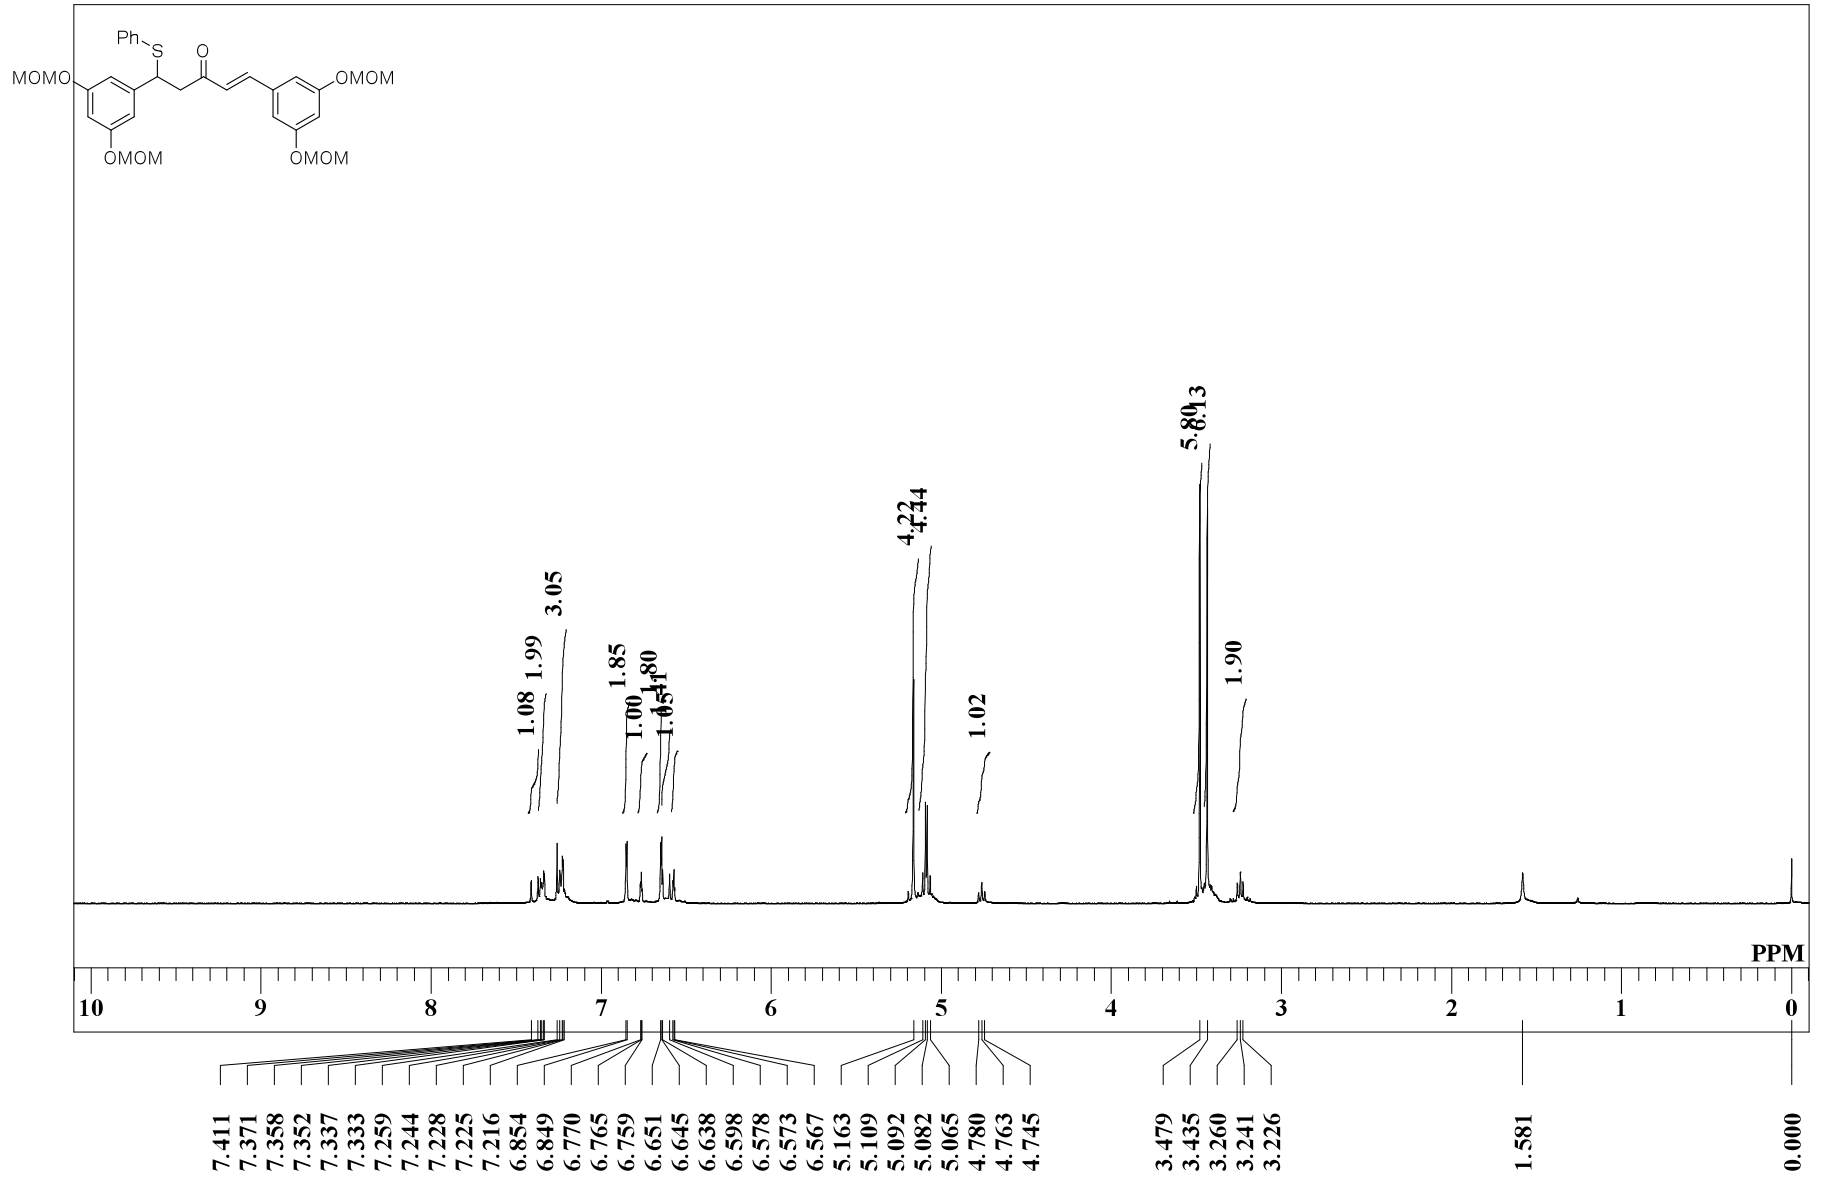

GO-Y181-13C

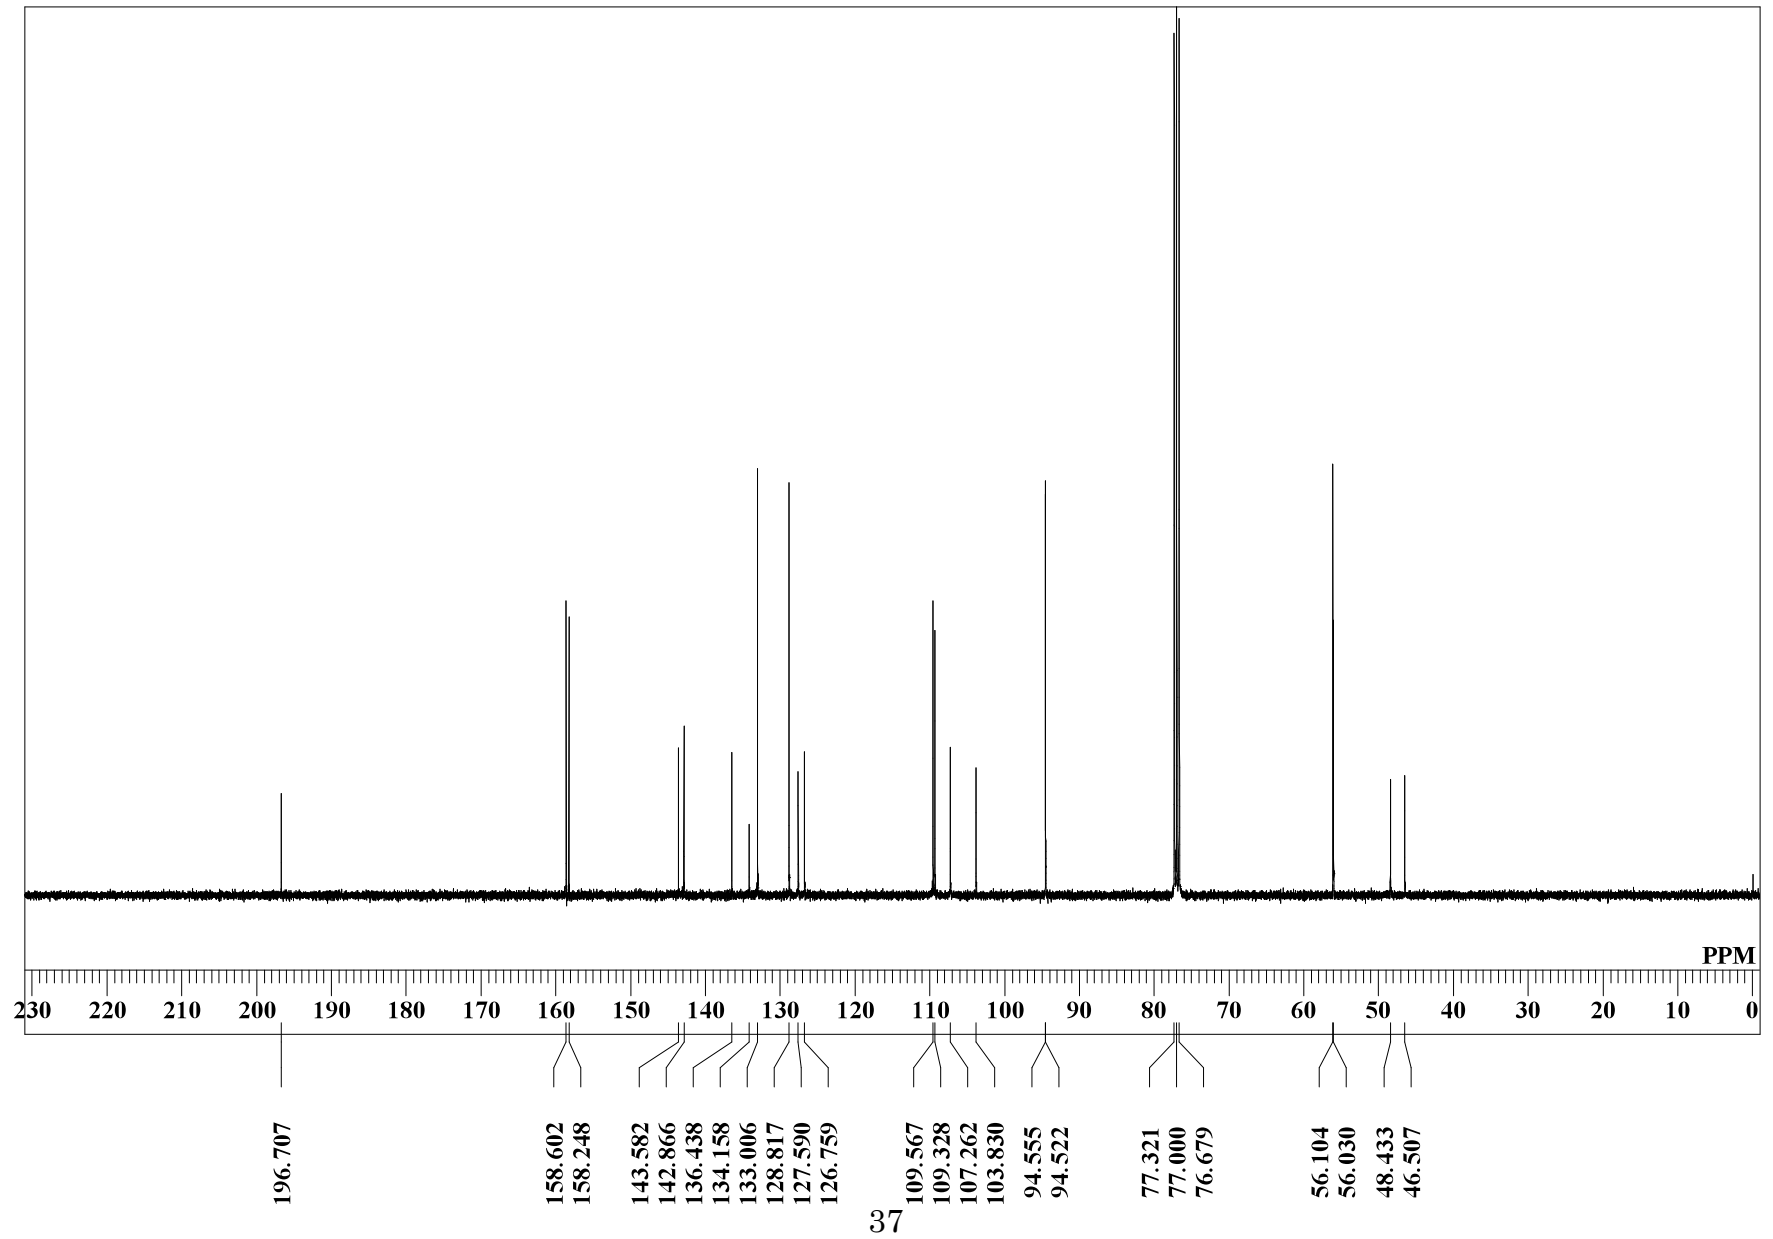

GO-Y135-1H

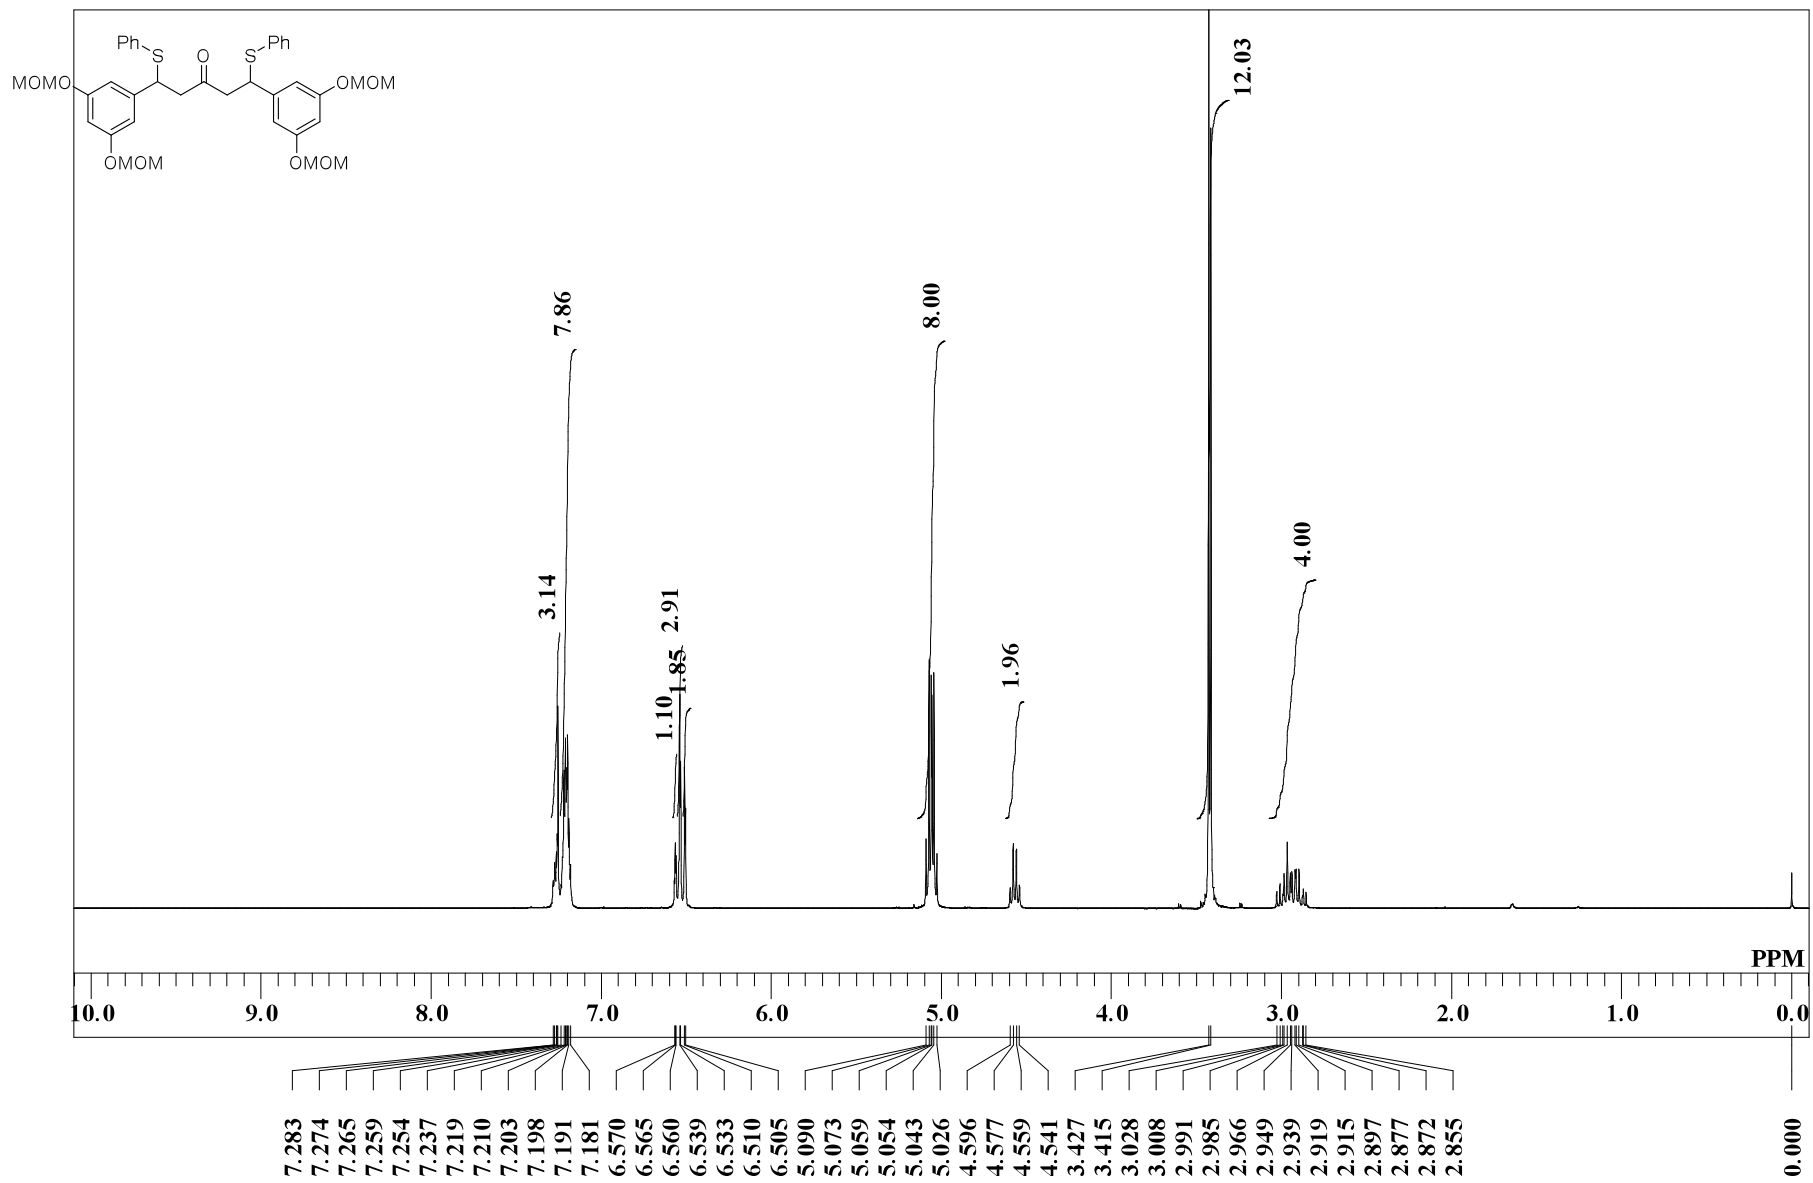

GO-Y135-13C

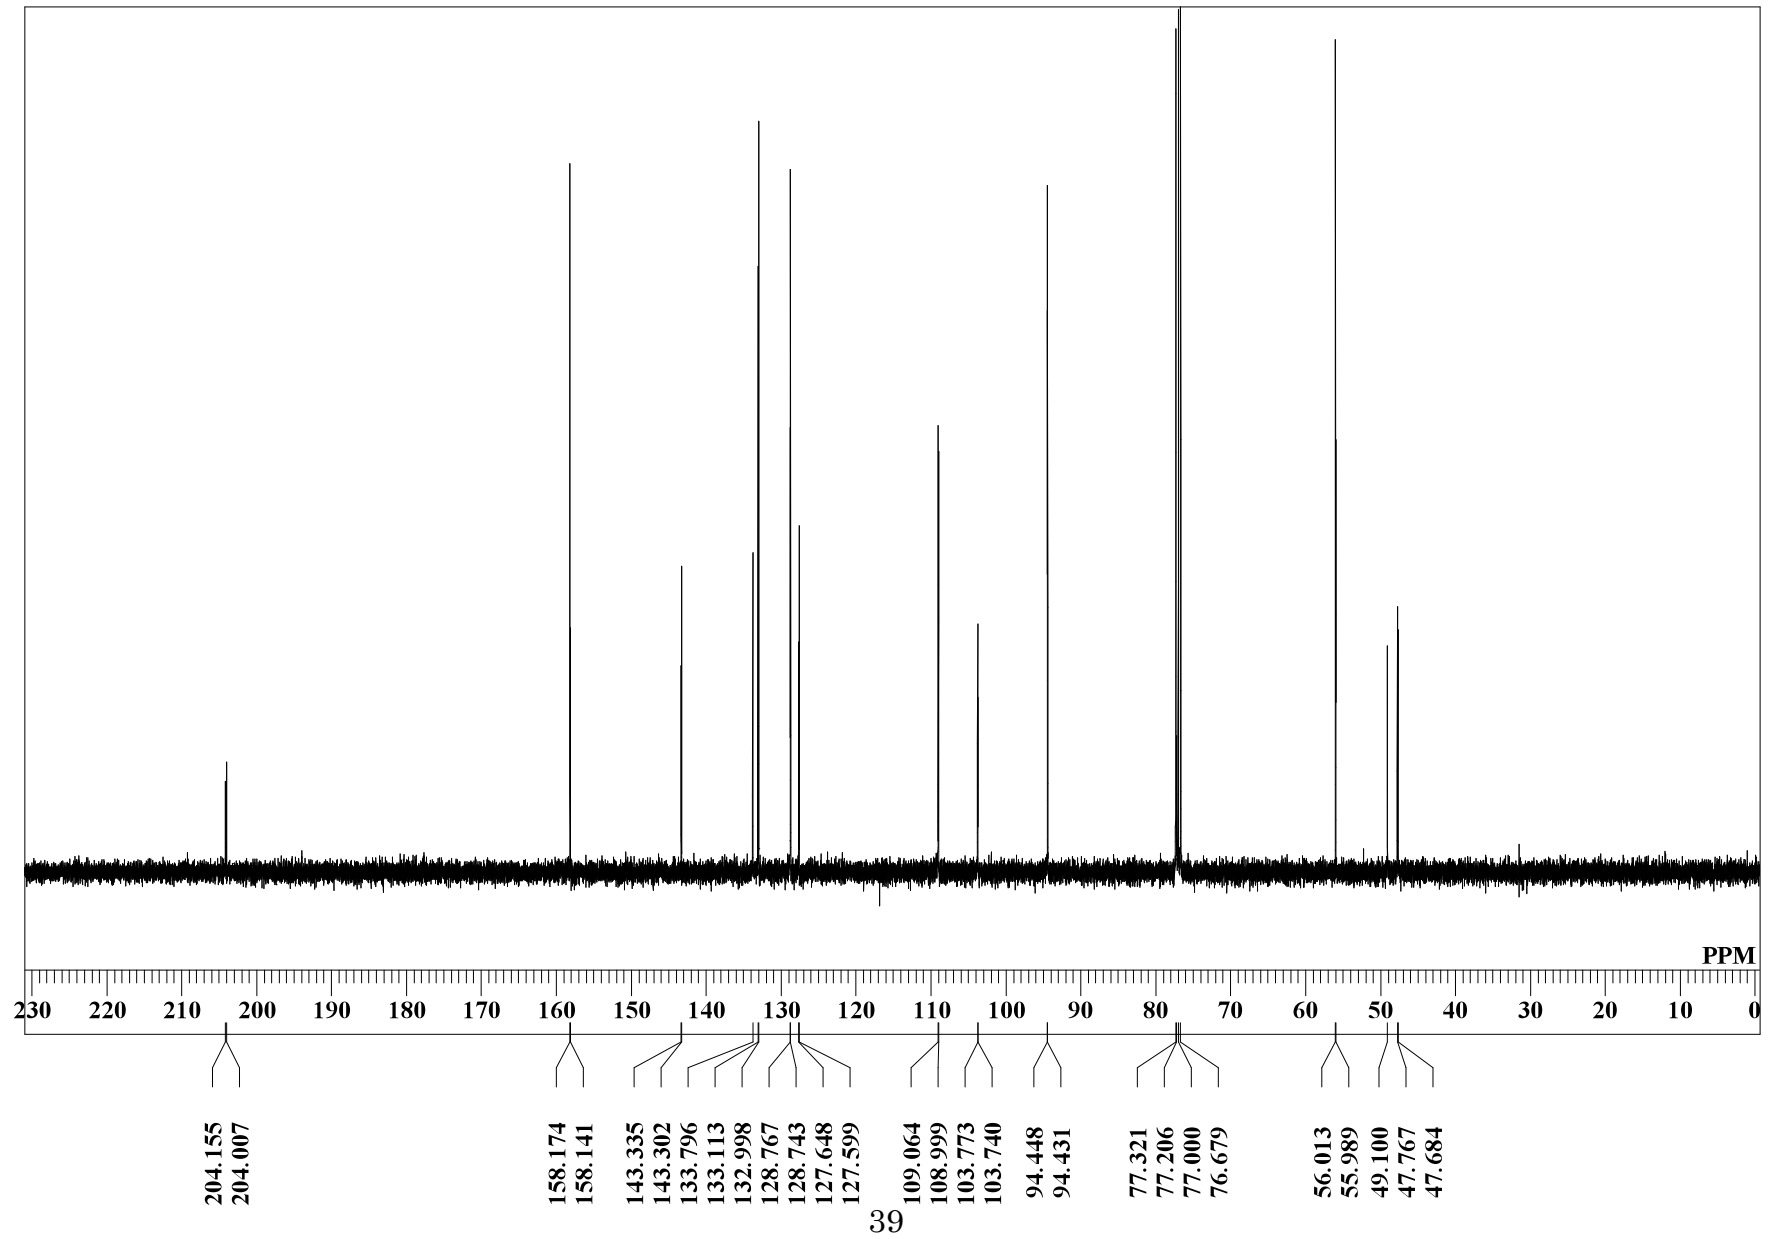

GO-Y136-1H

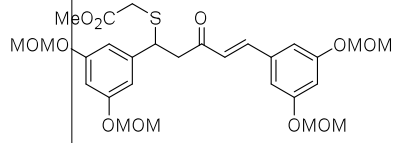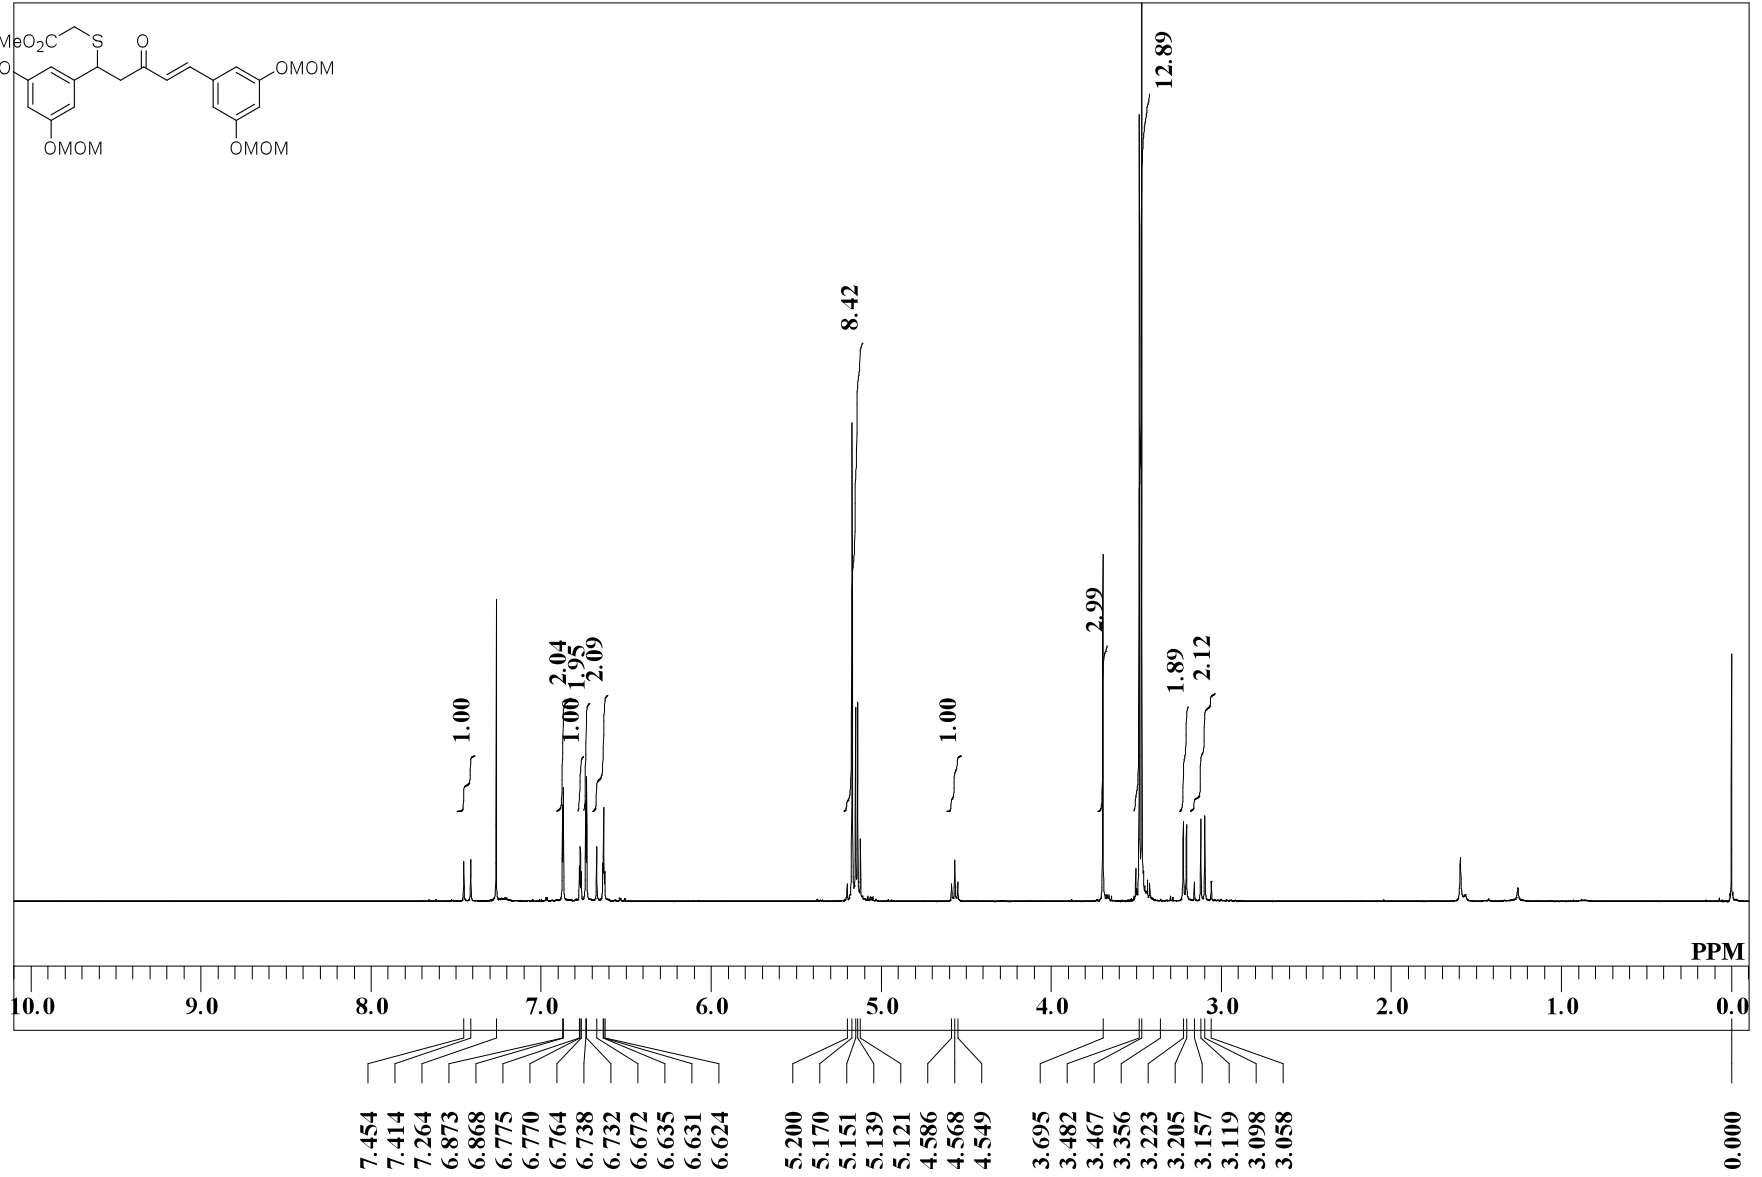



GO- Y136- 13C

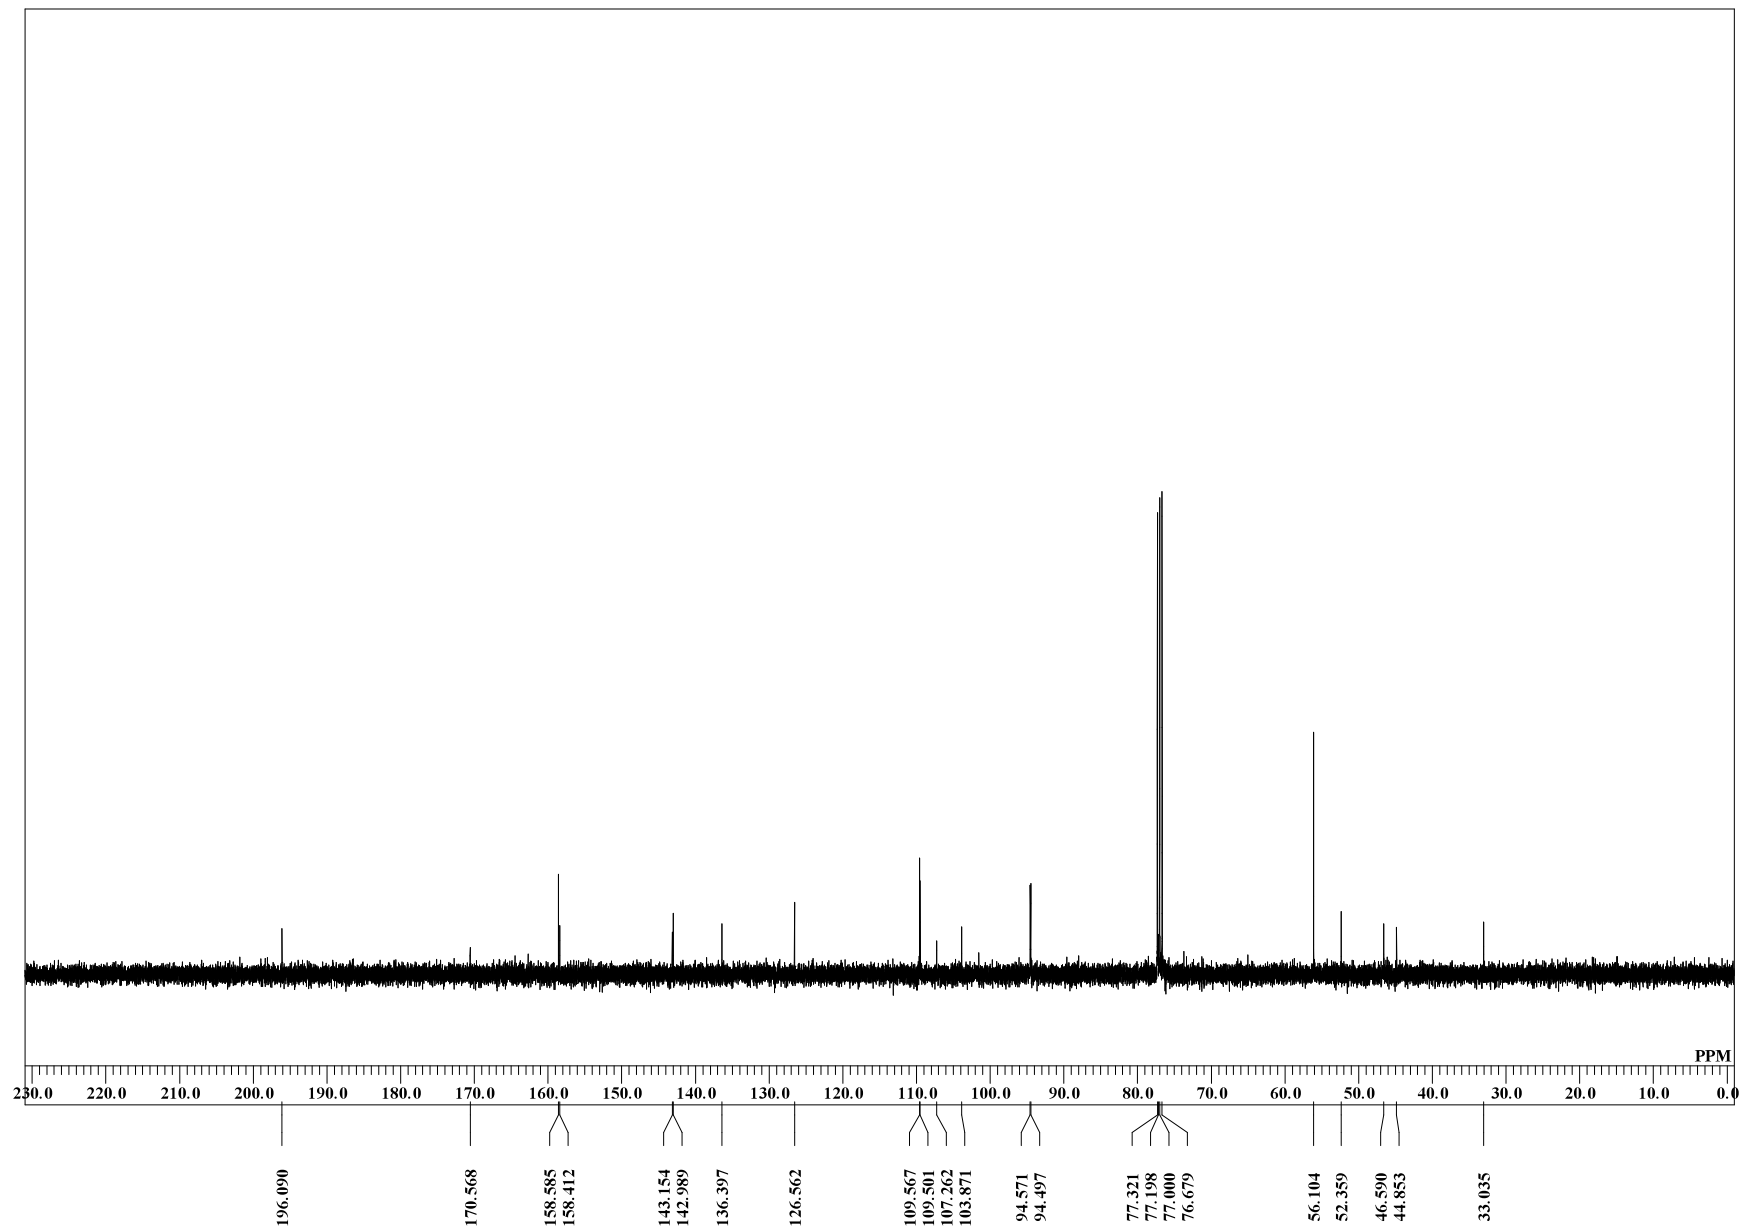

GO-Y137-1H

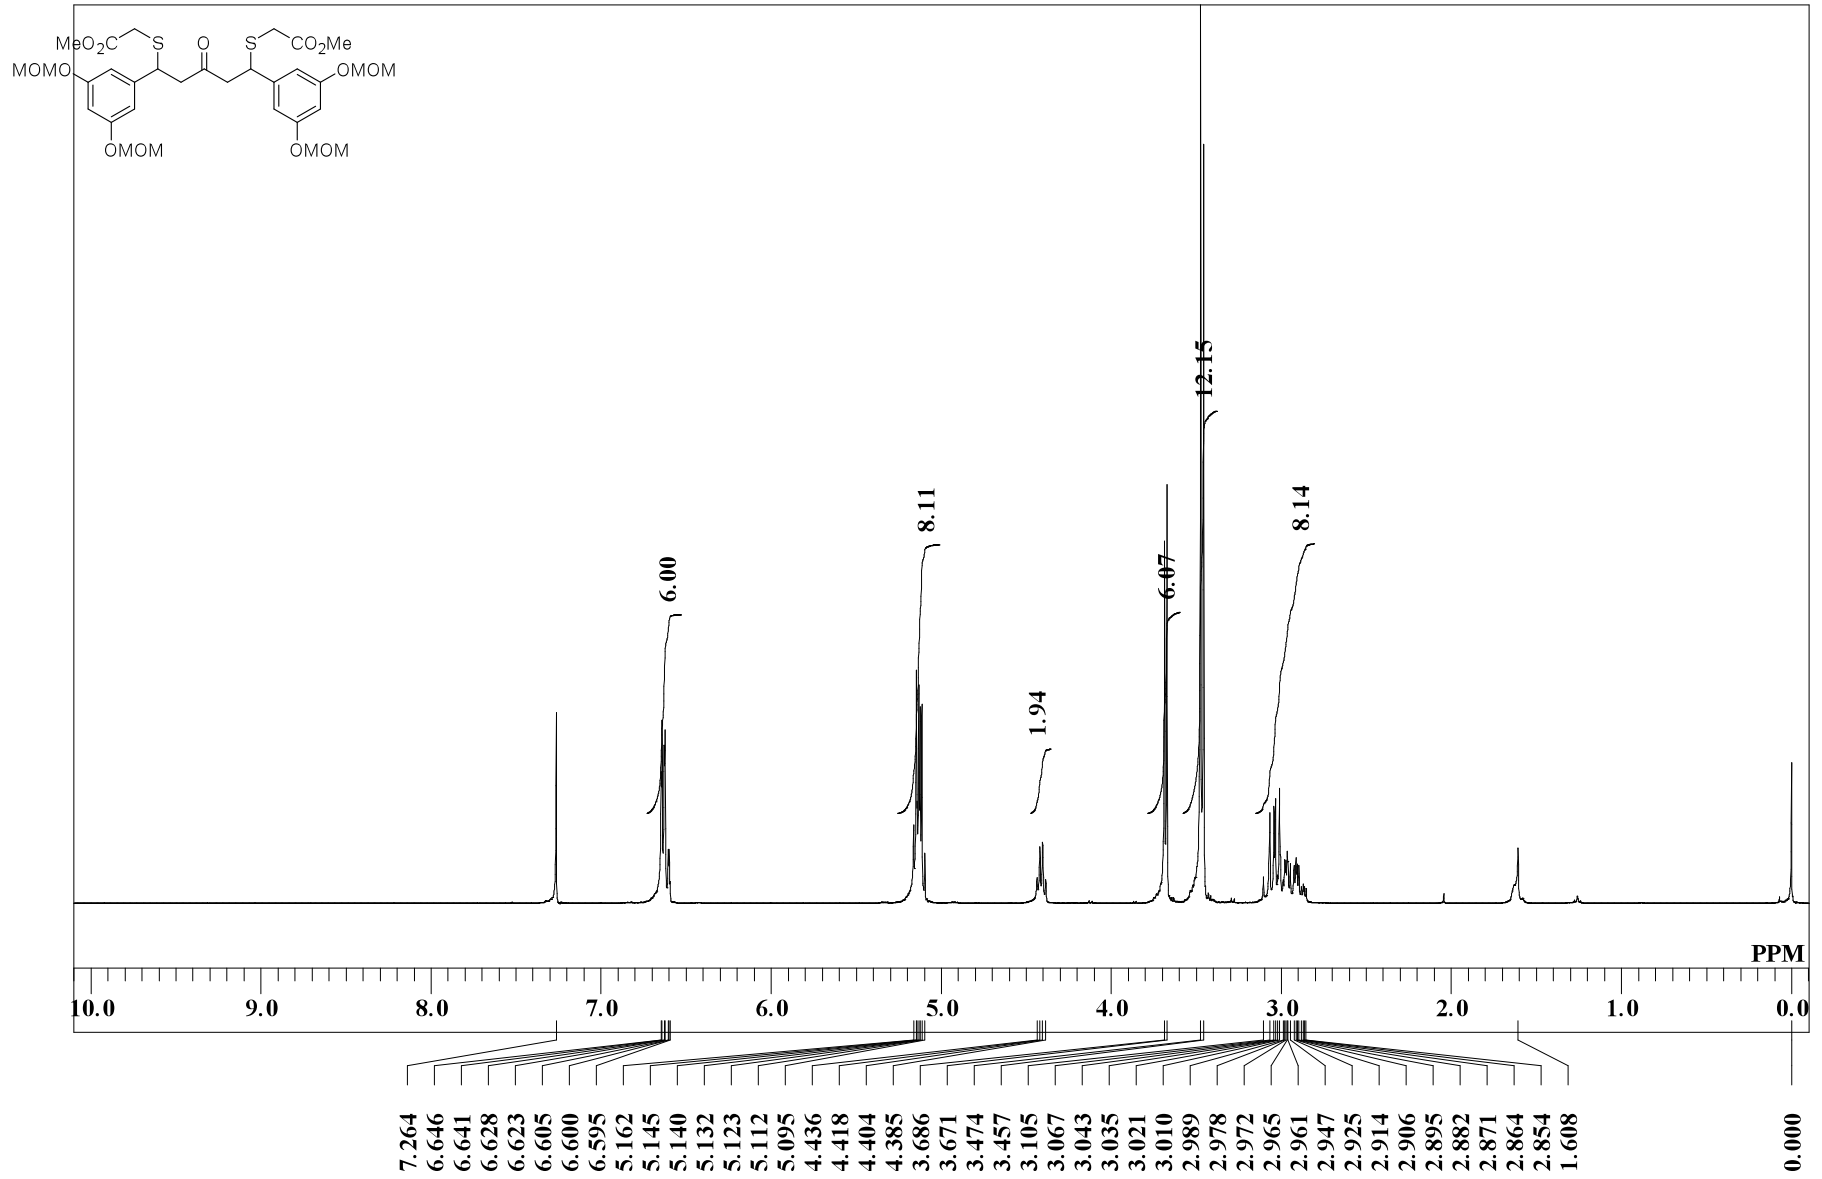

GO-Y137-13C

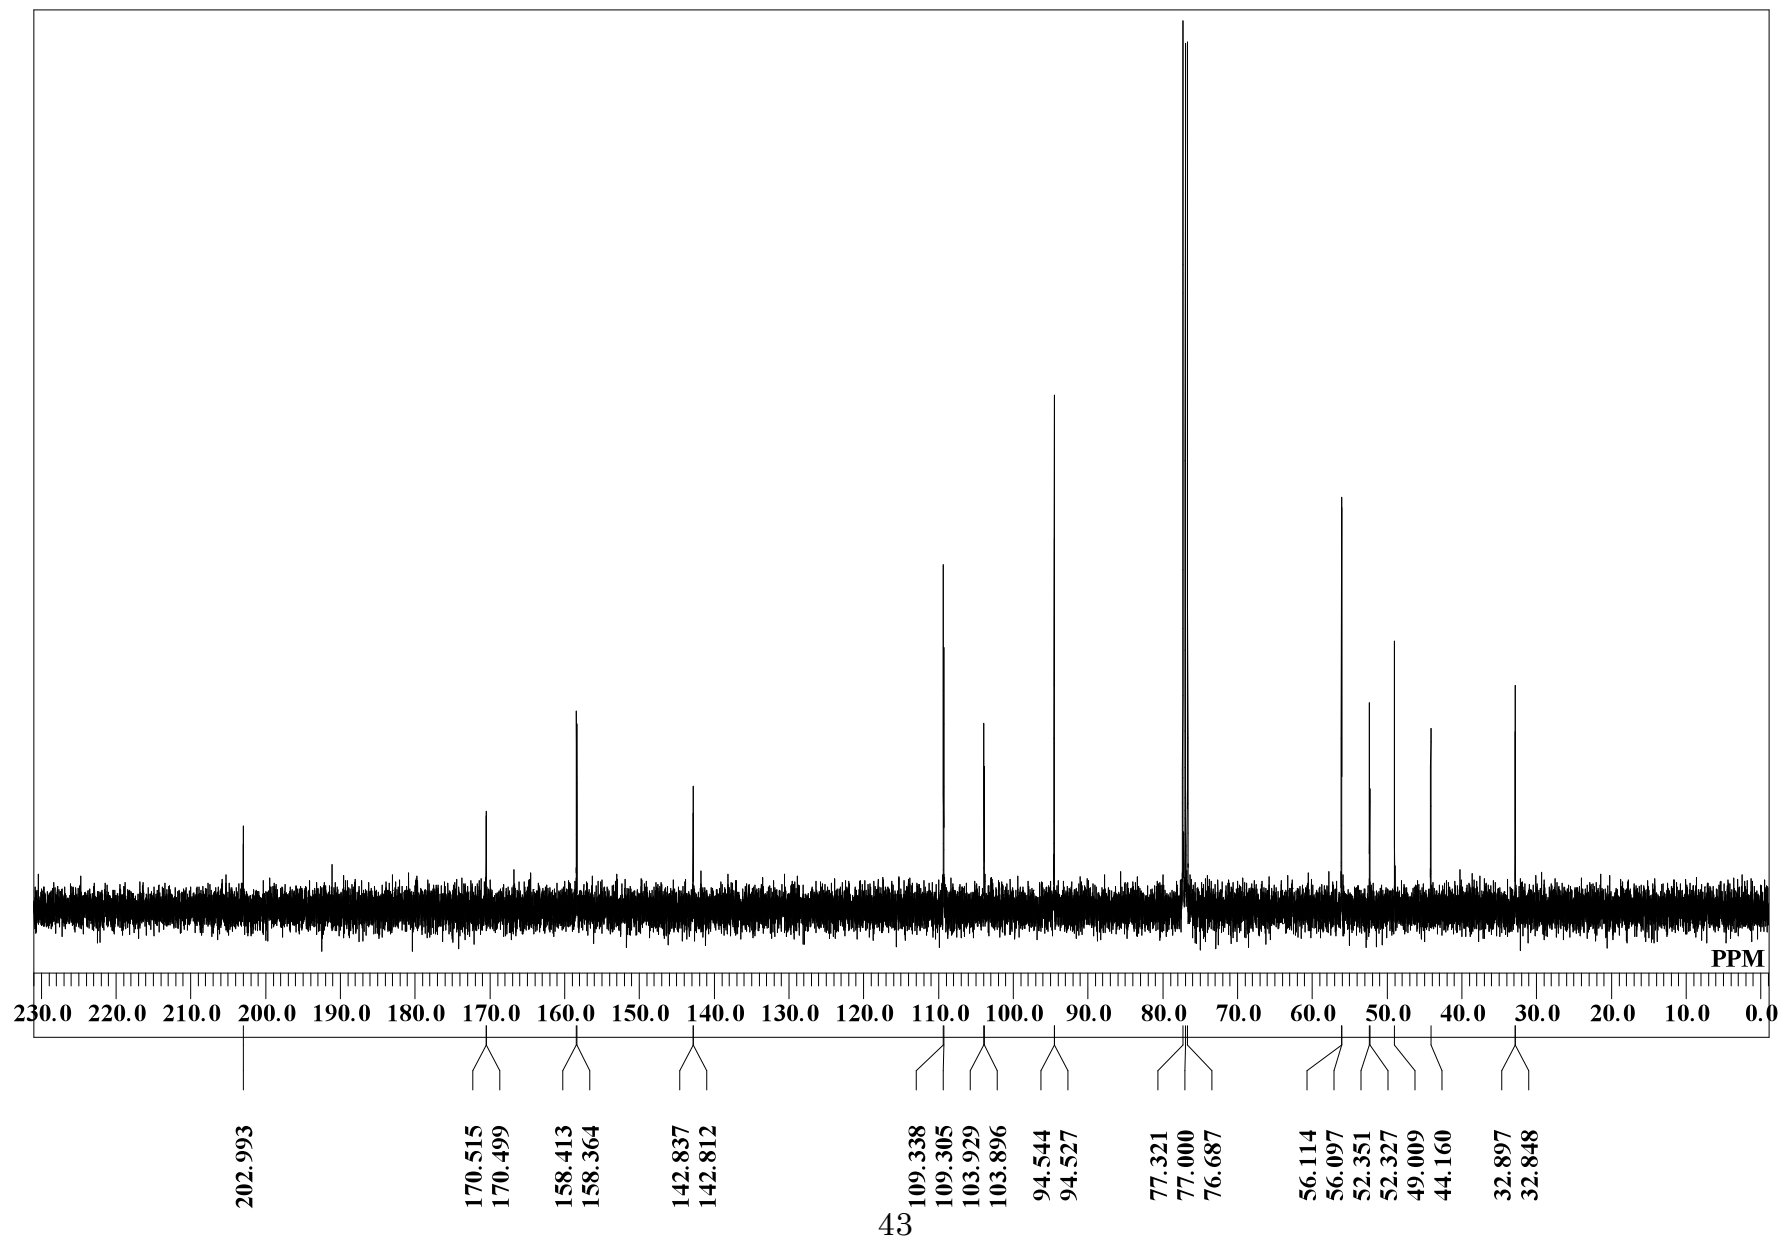

GO-Y138-1H

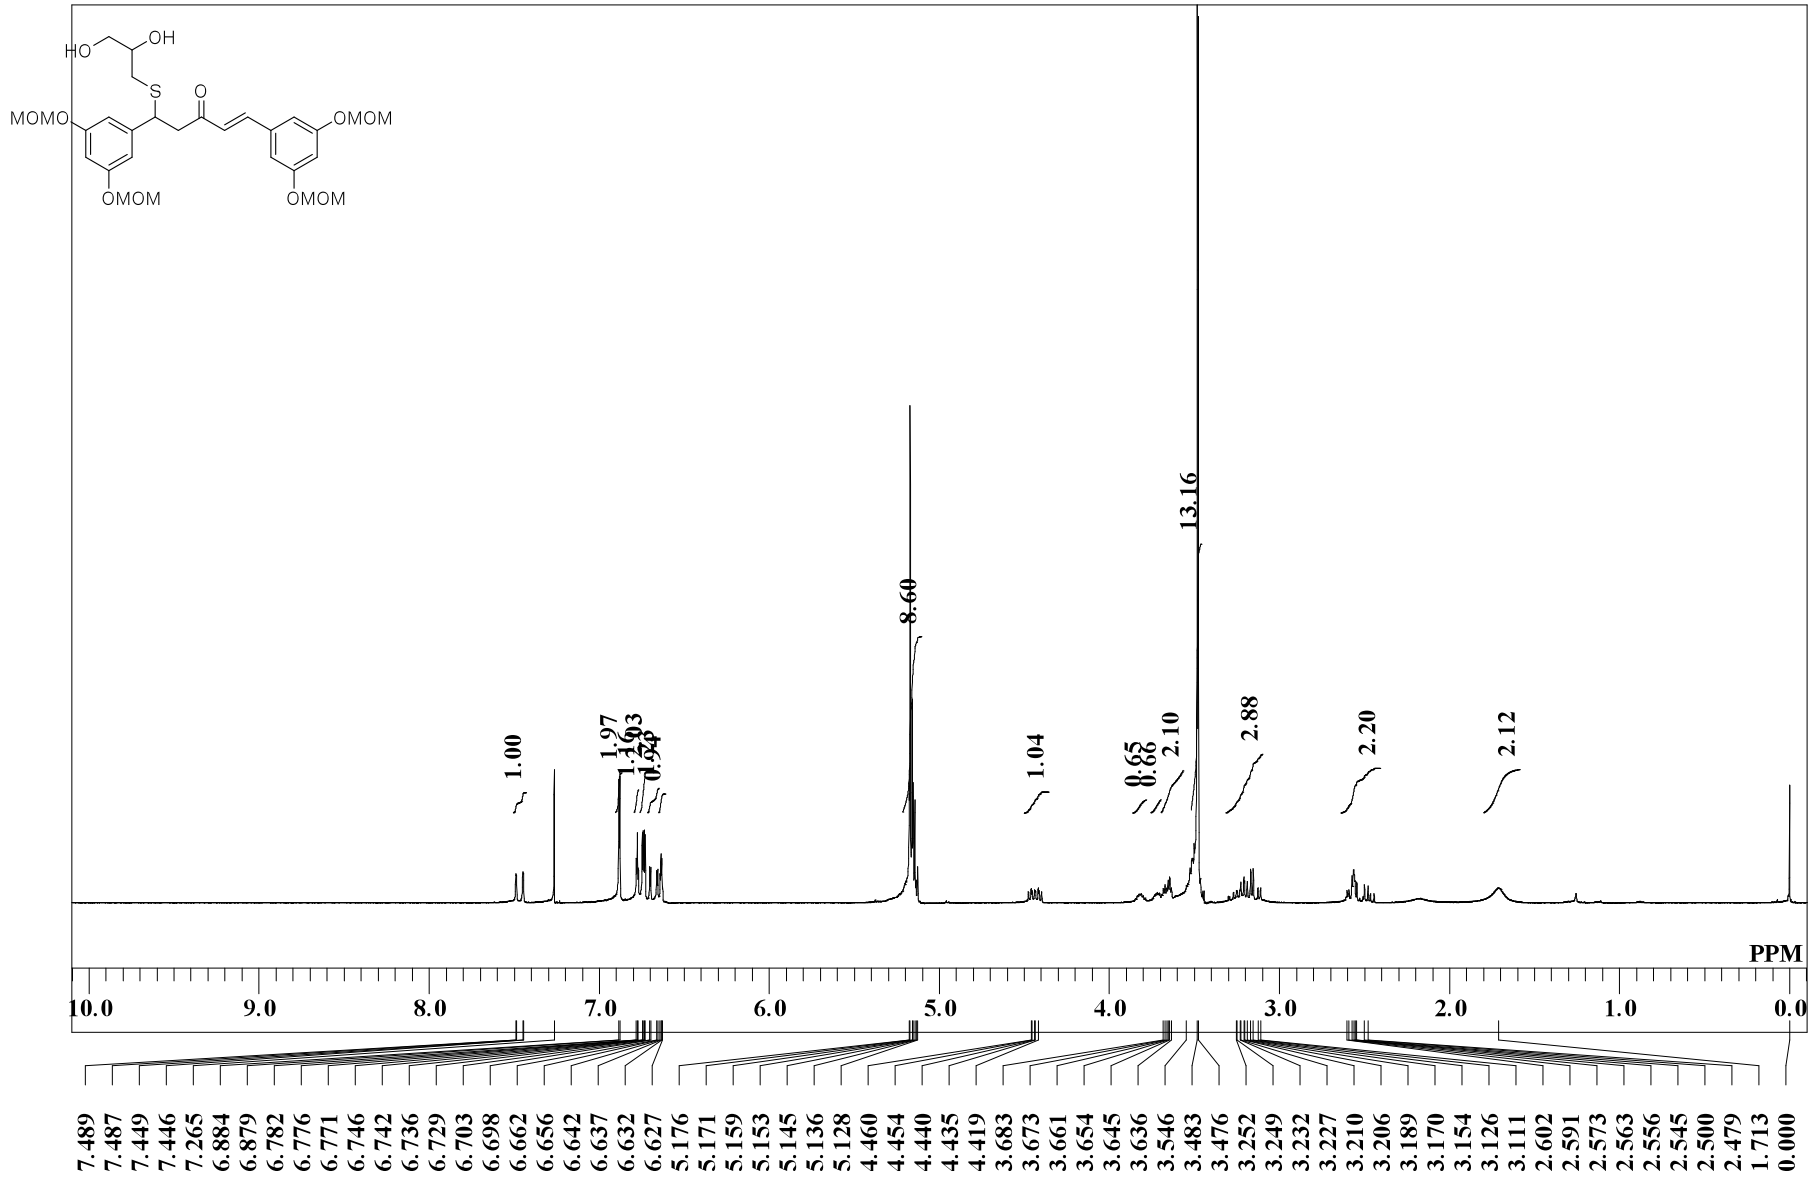

GO-Y138-13C

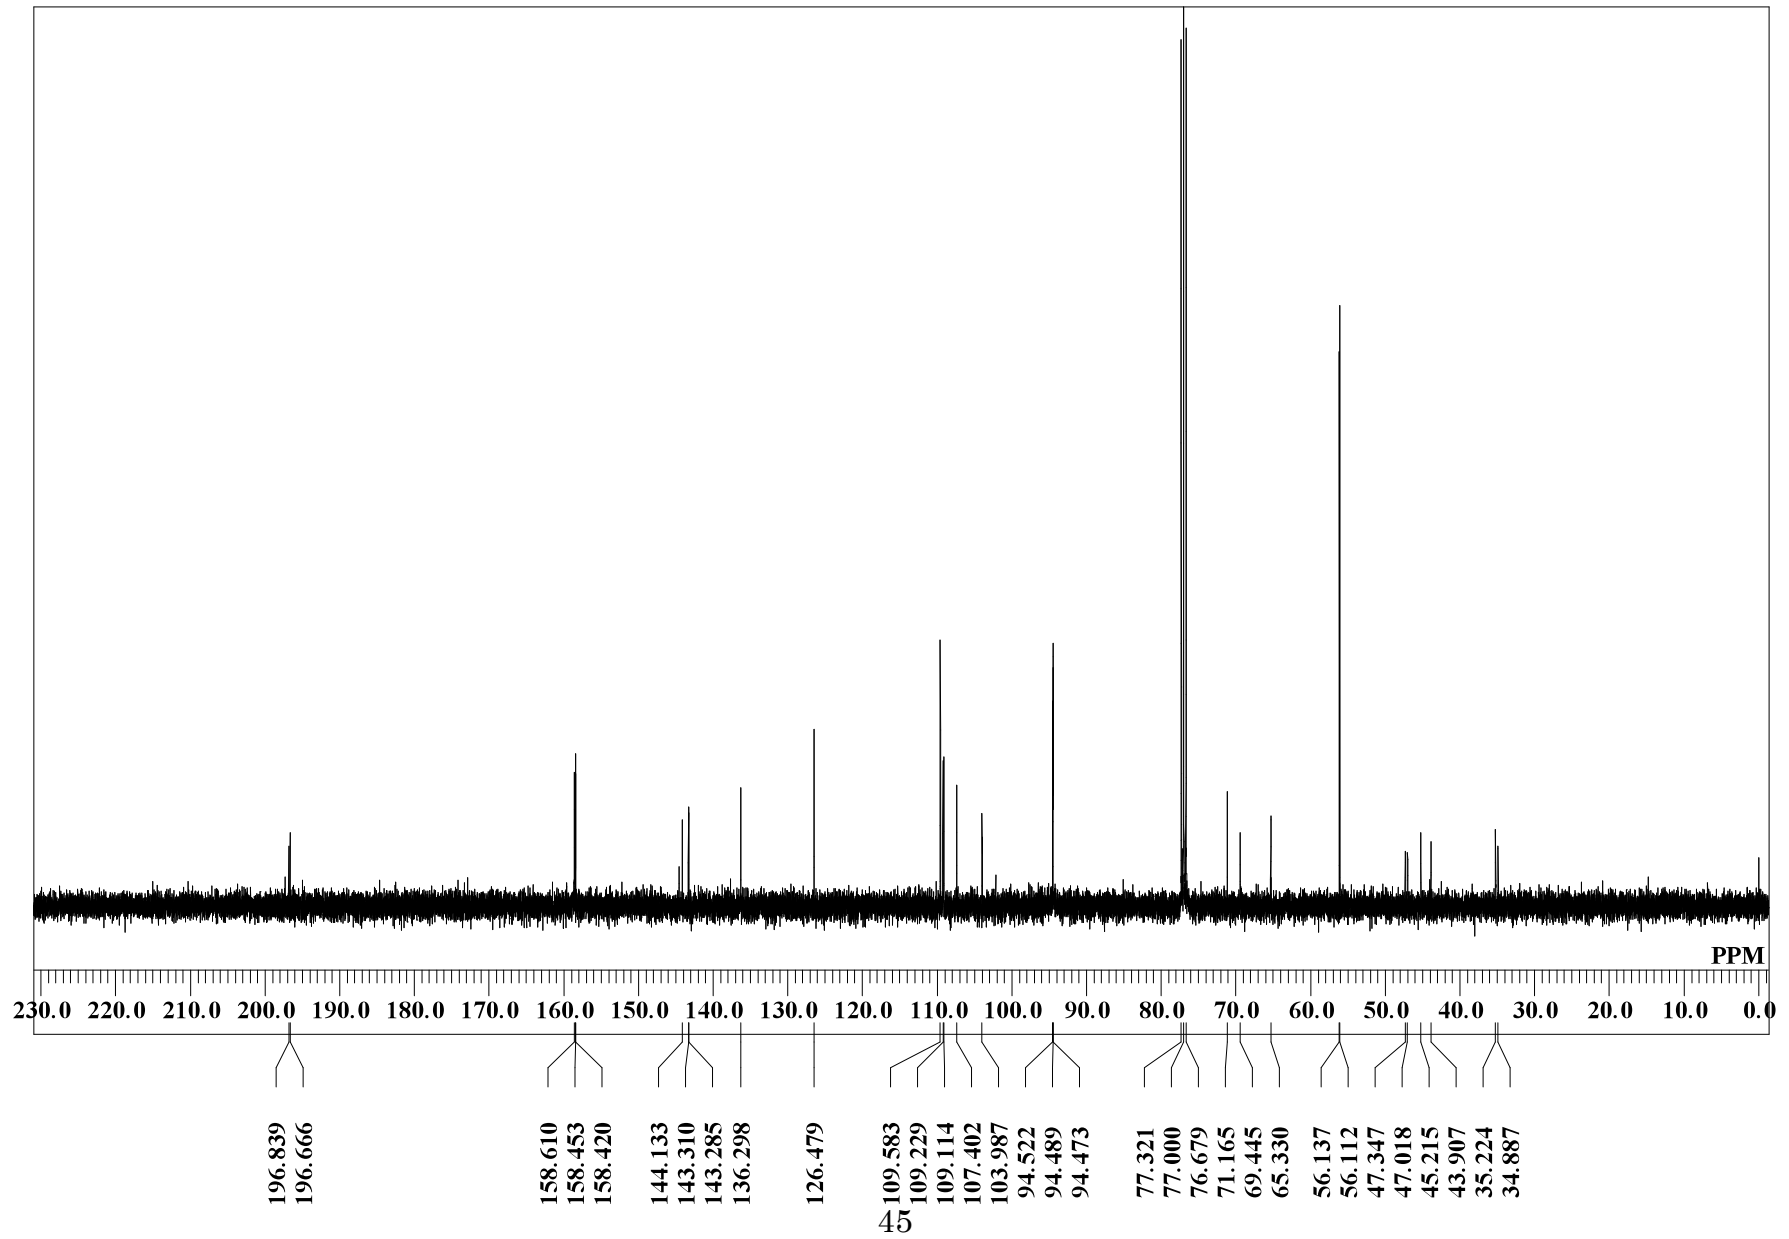



GO-Y139-13C-CD3OD

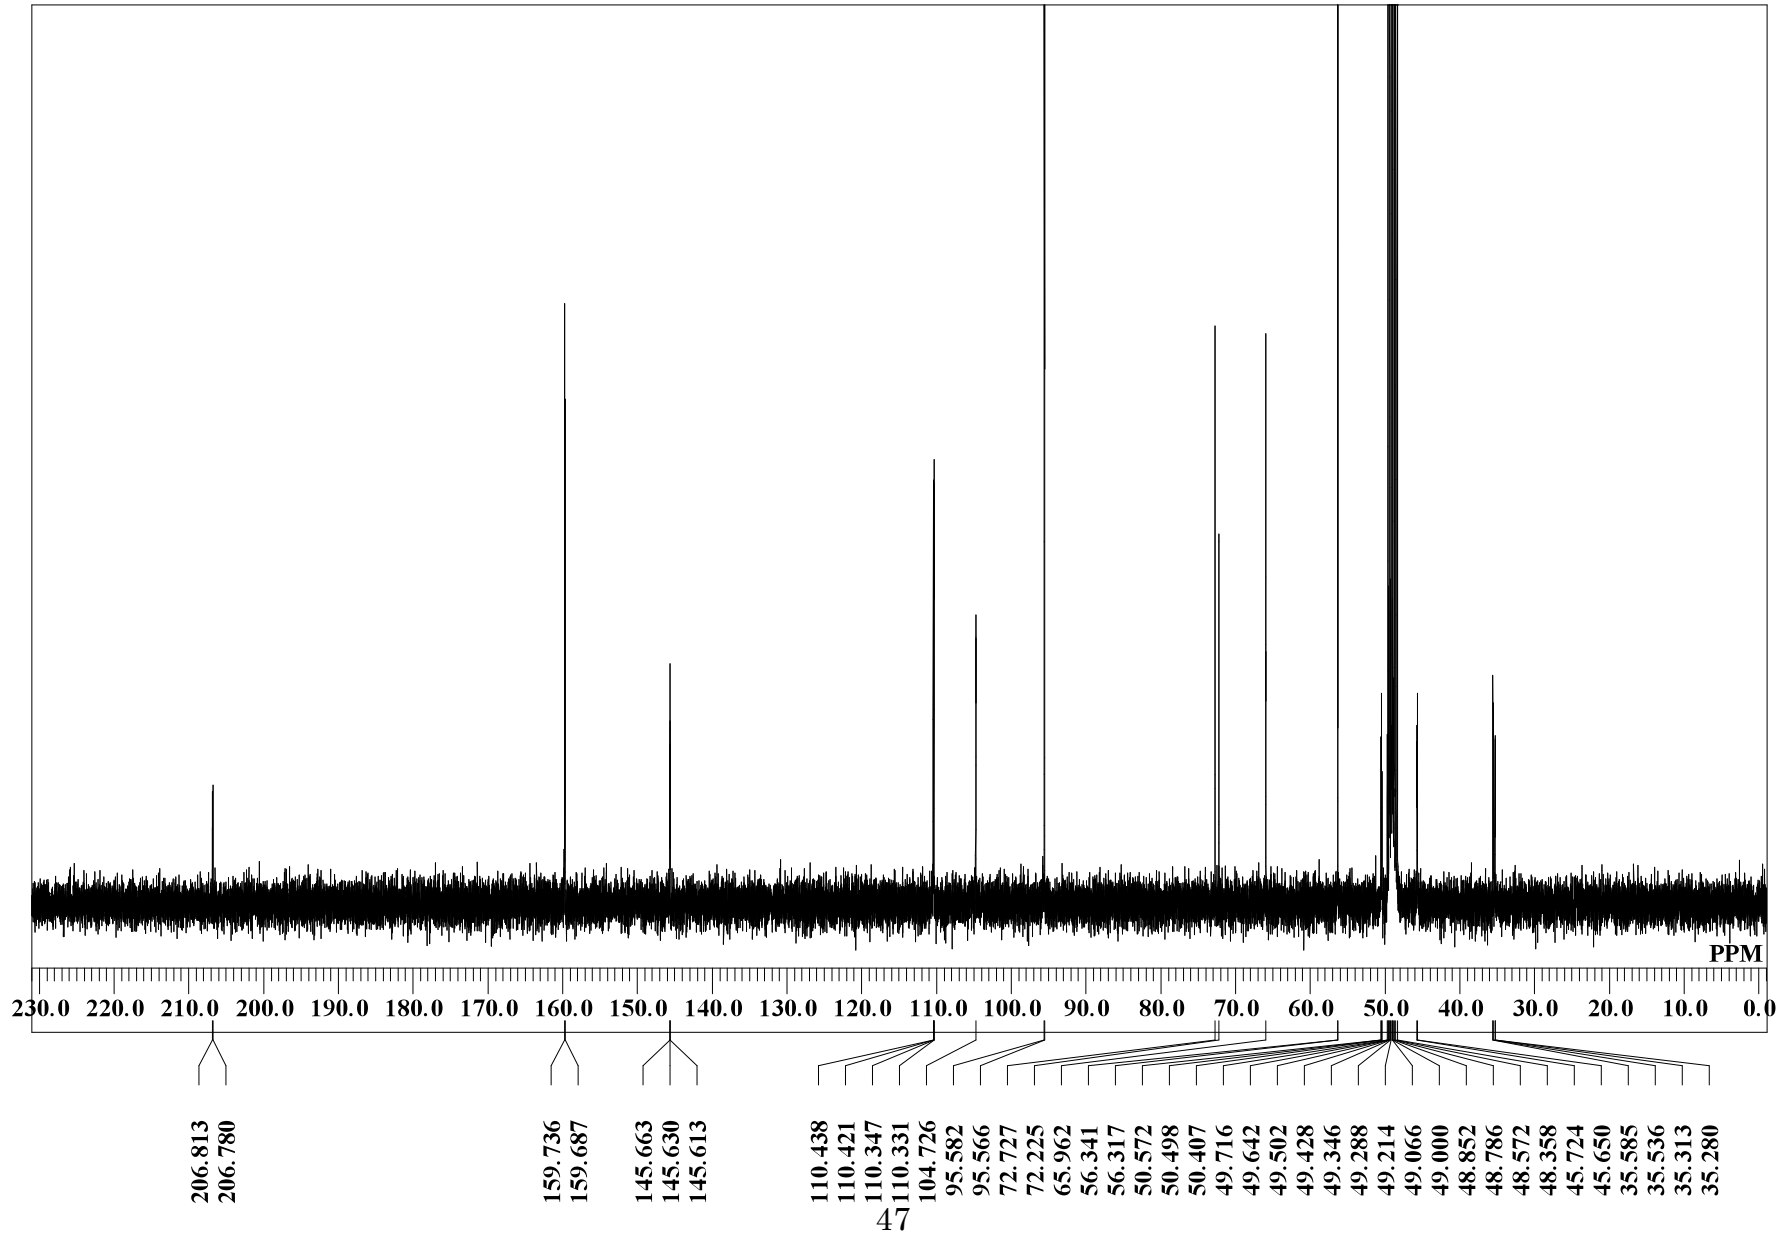





GO-Y141-13C

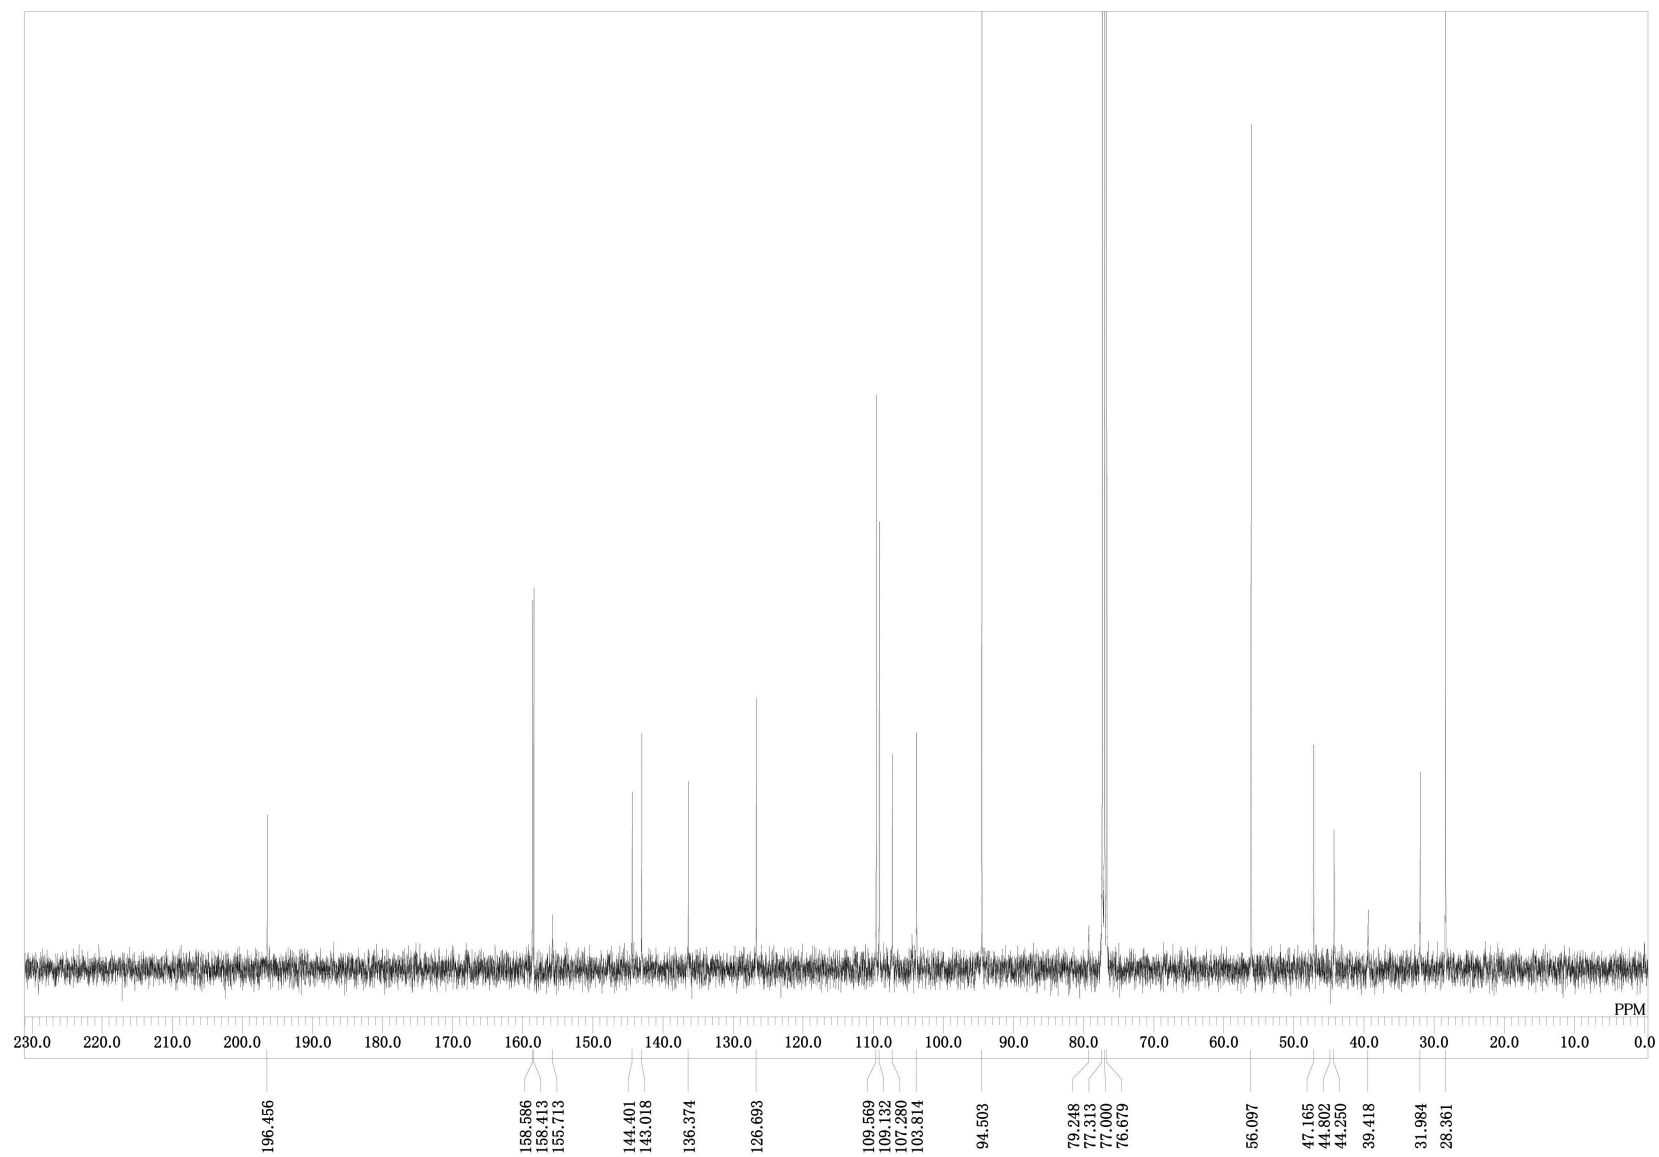

GO-Y142-1H

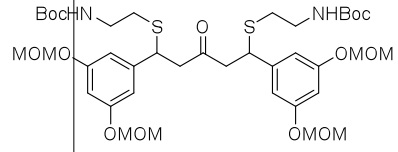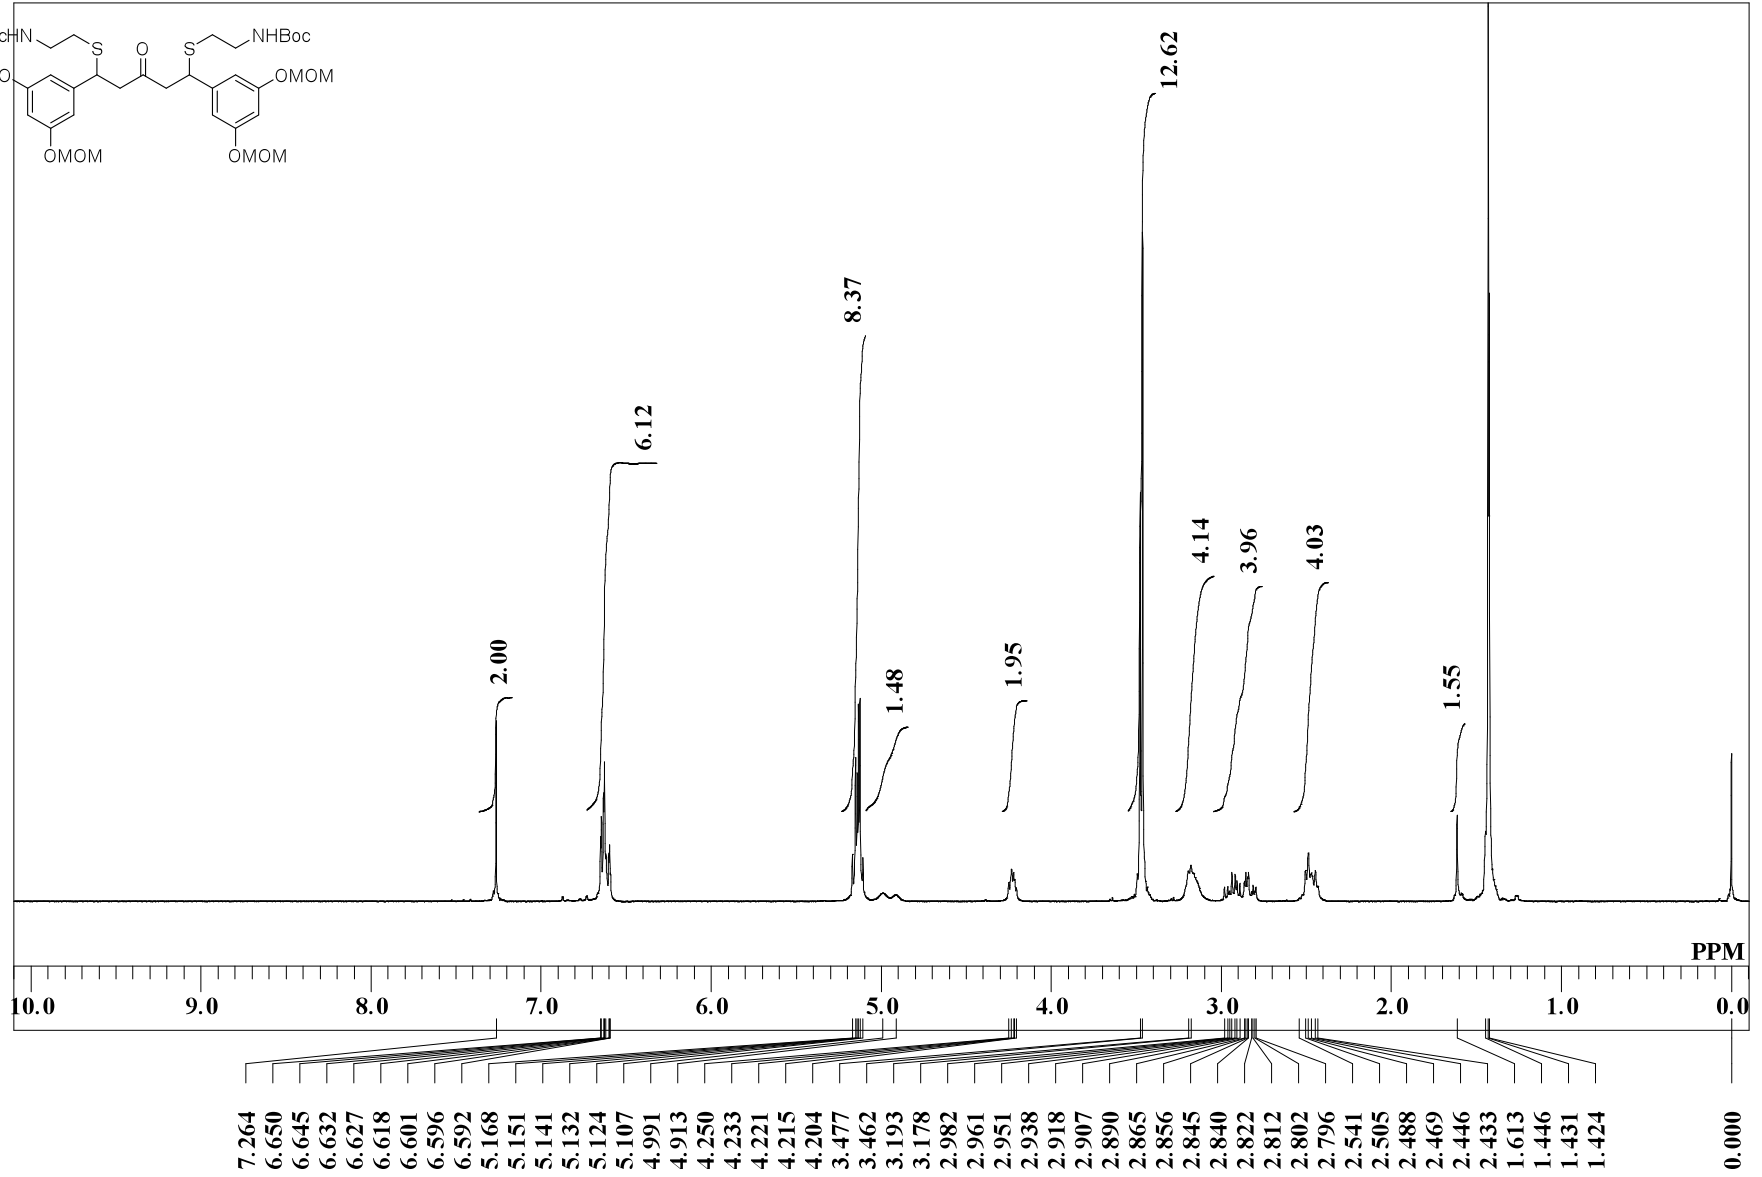

GO- Y142- 13C

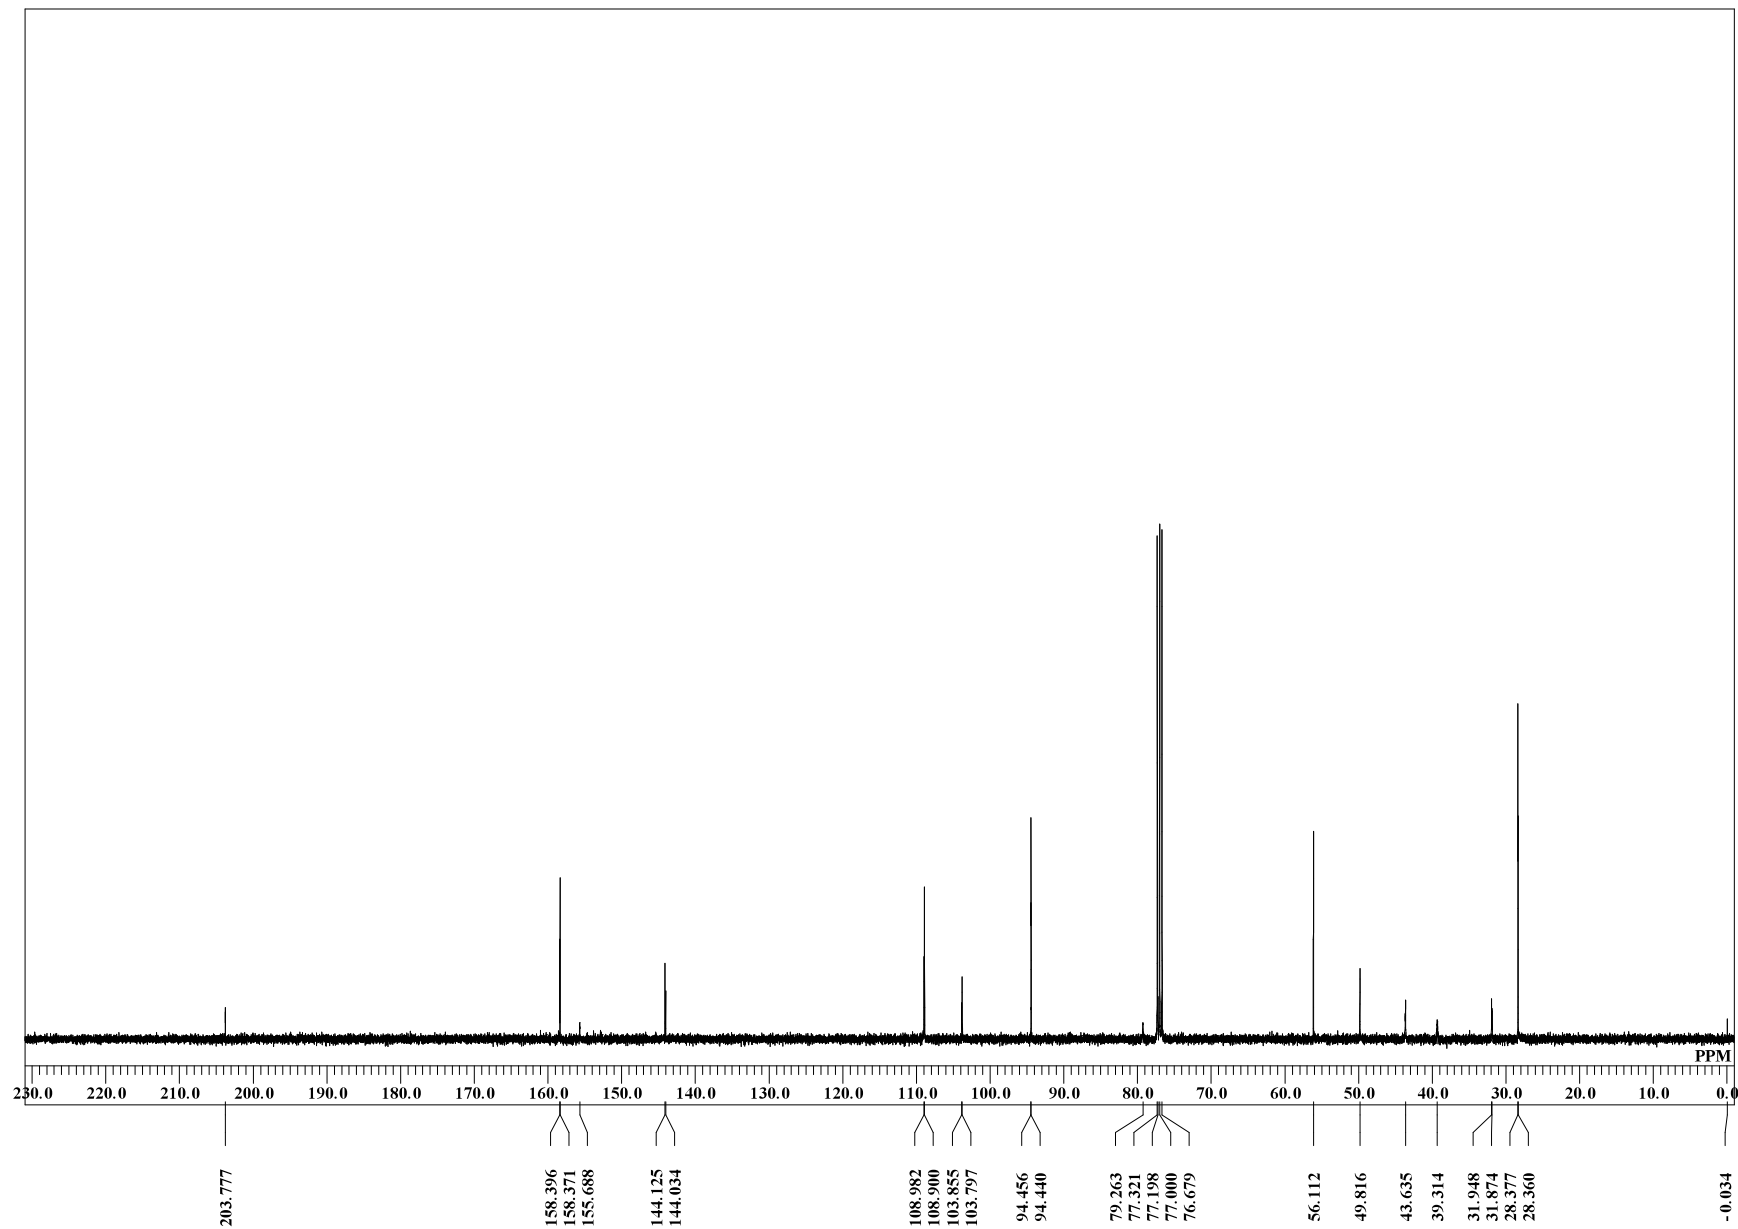

GO-Y145-1H

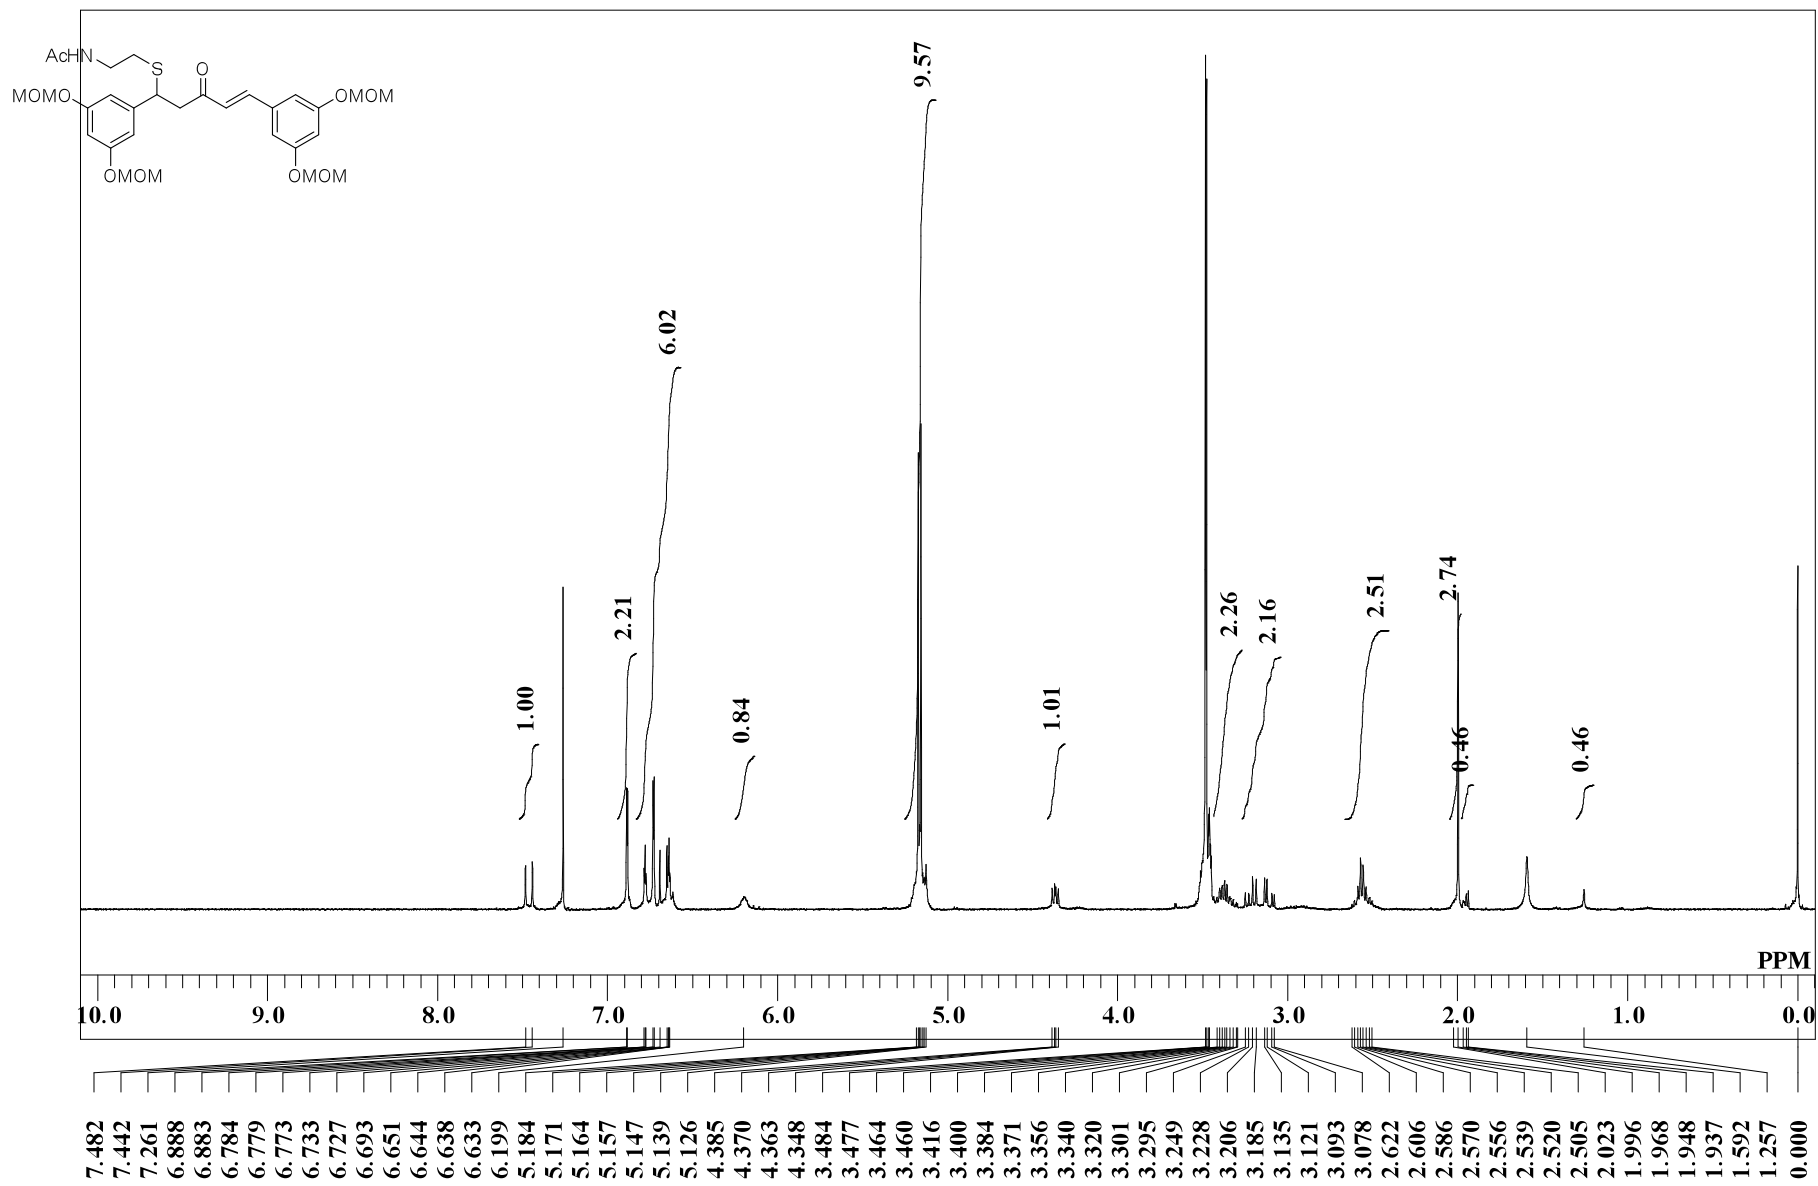

GO-Y145-13C

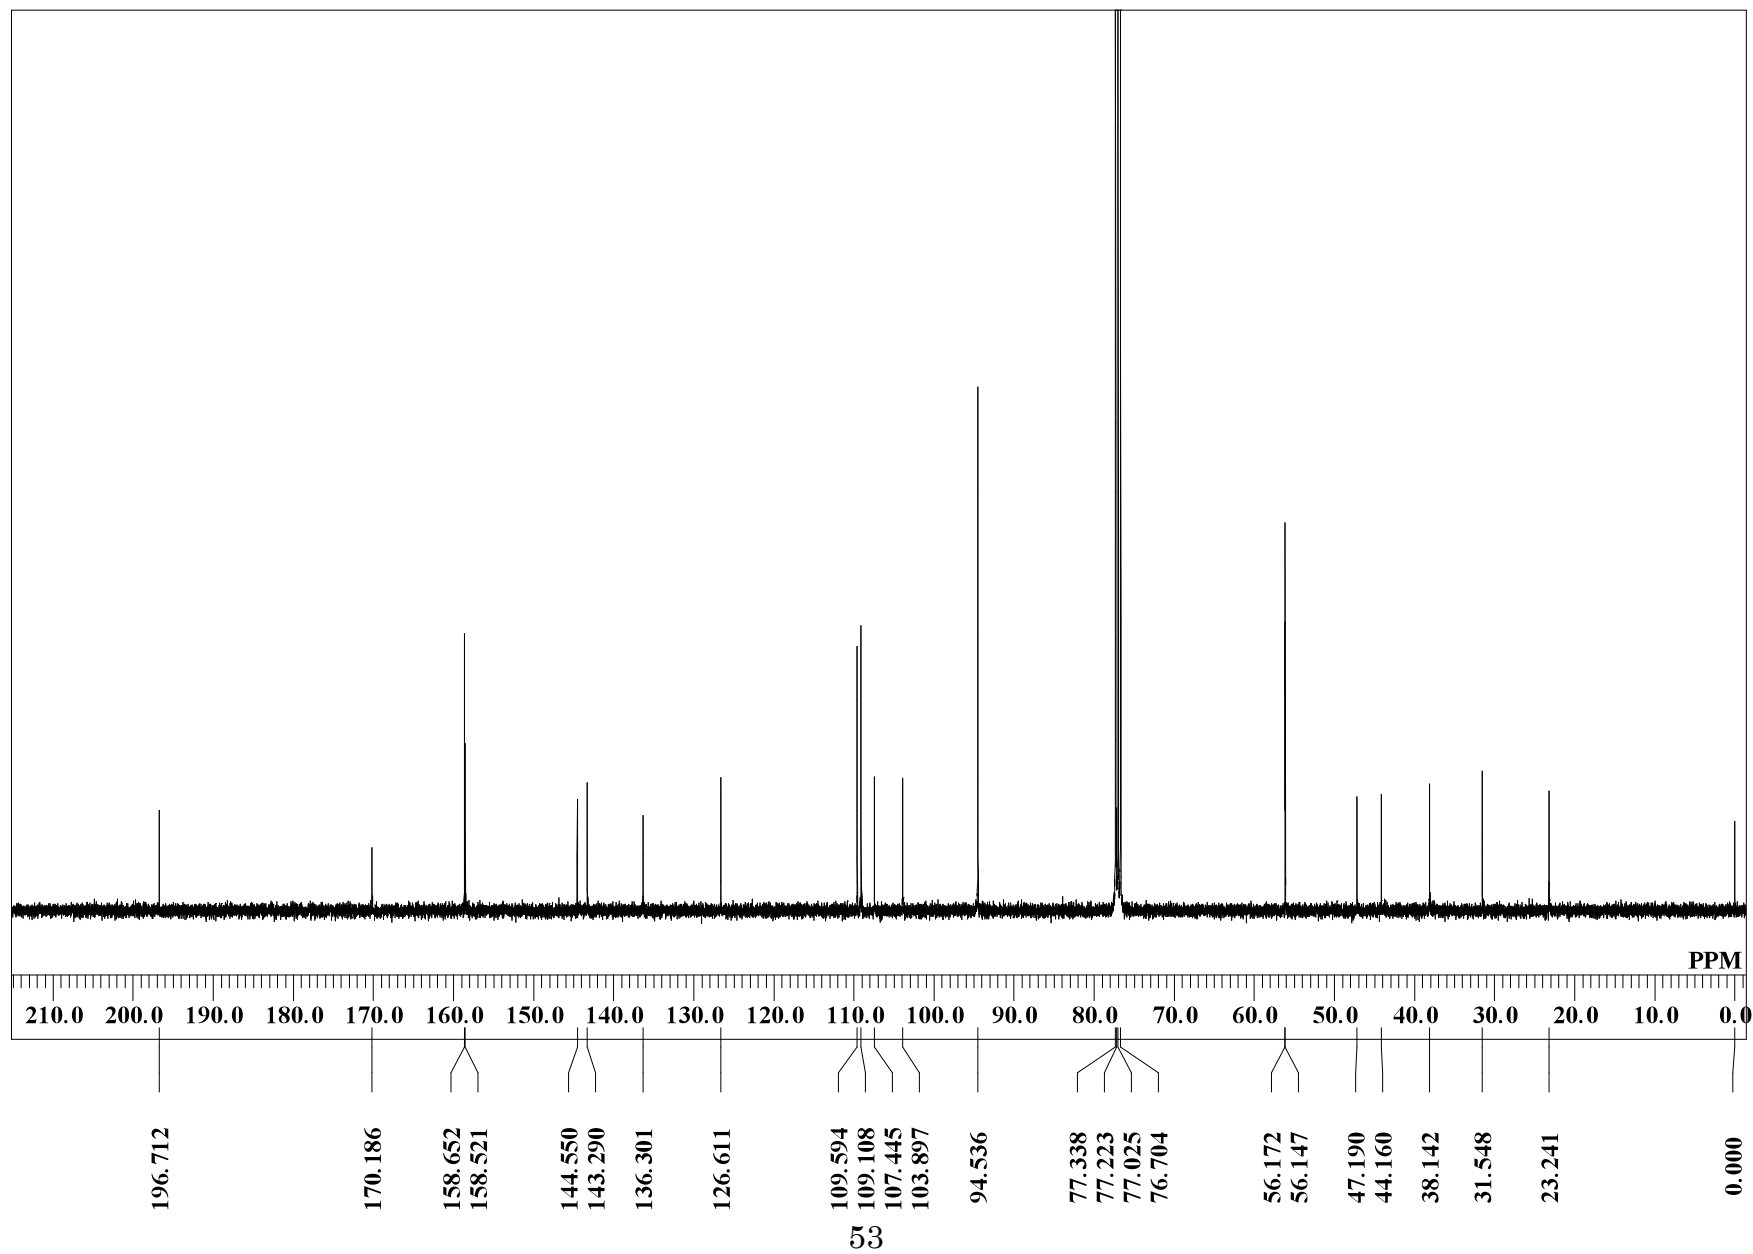

GO-Y146-1H

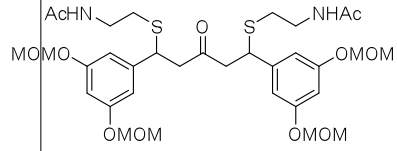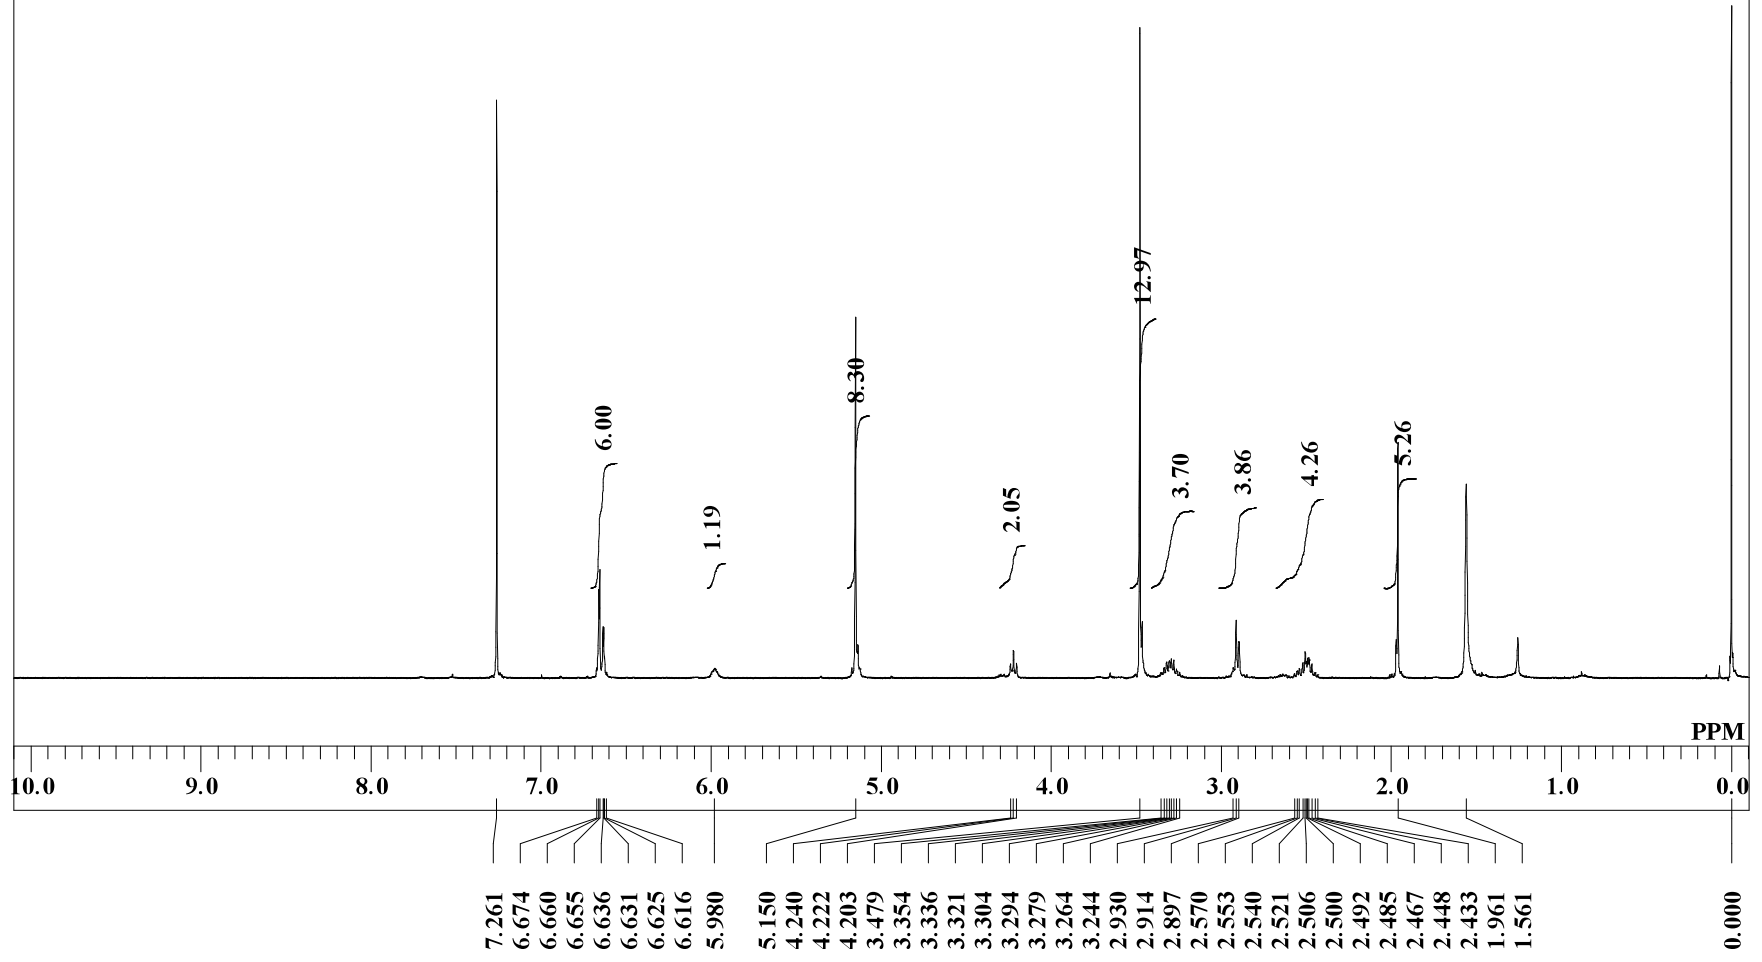

GO-Y146-13C

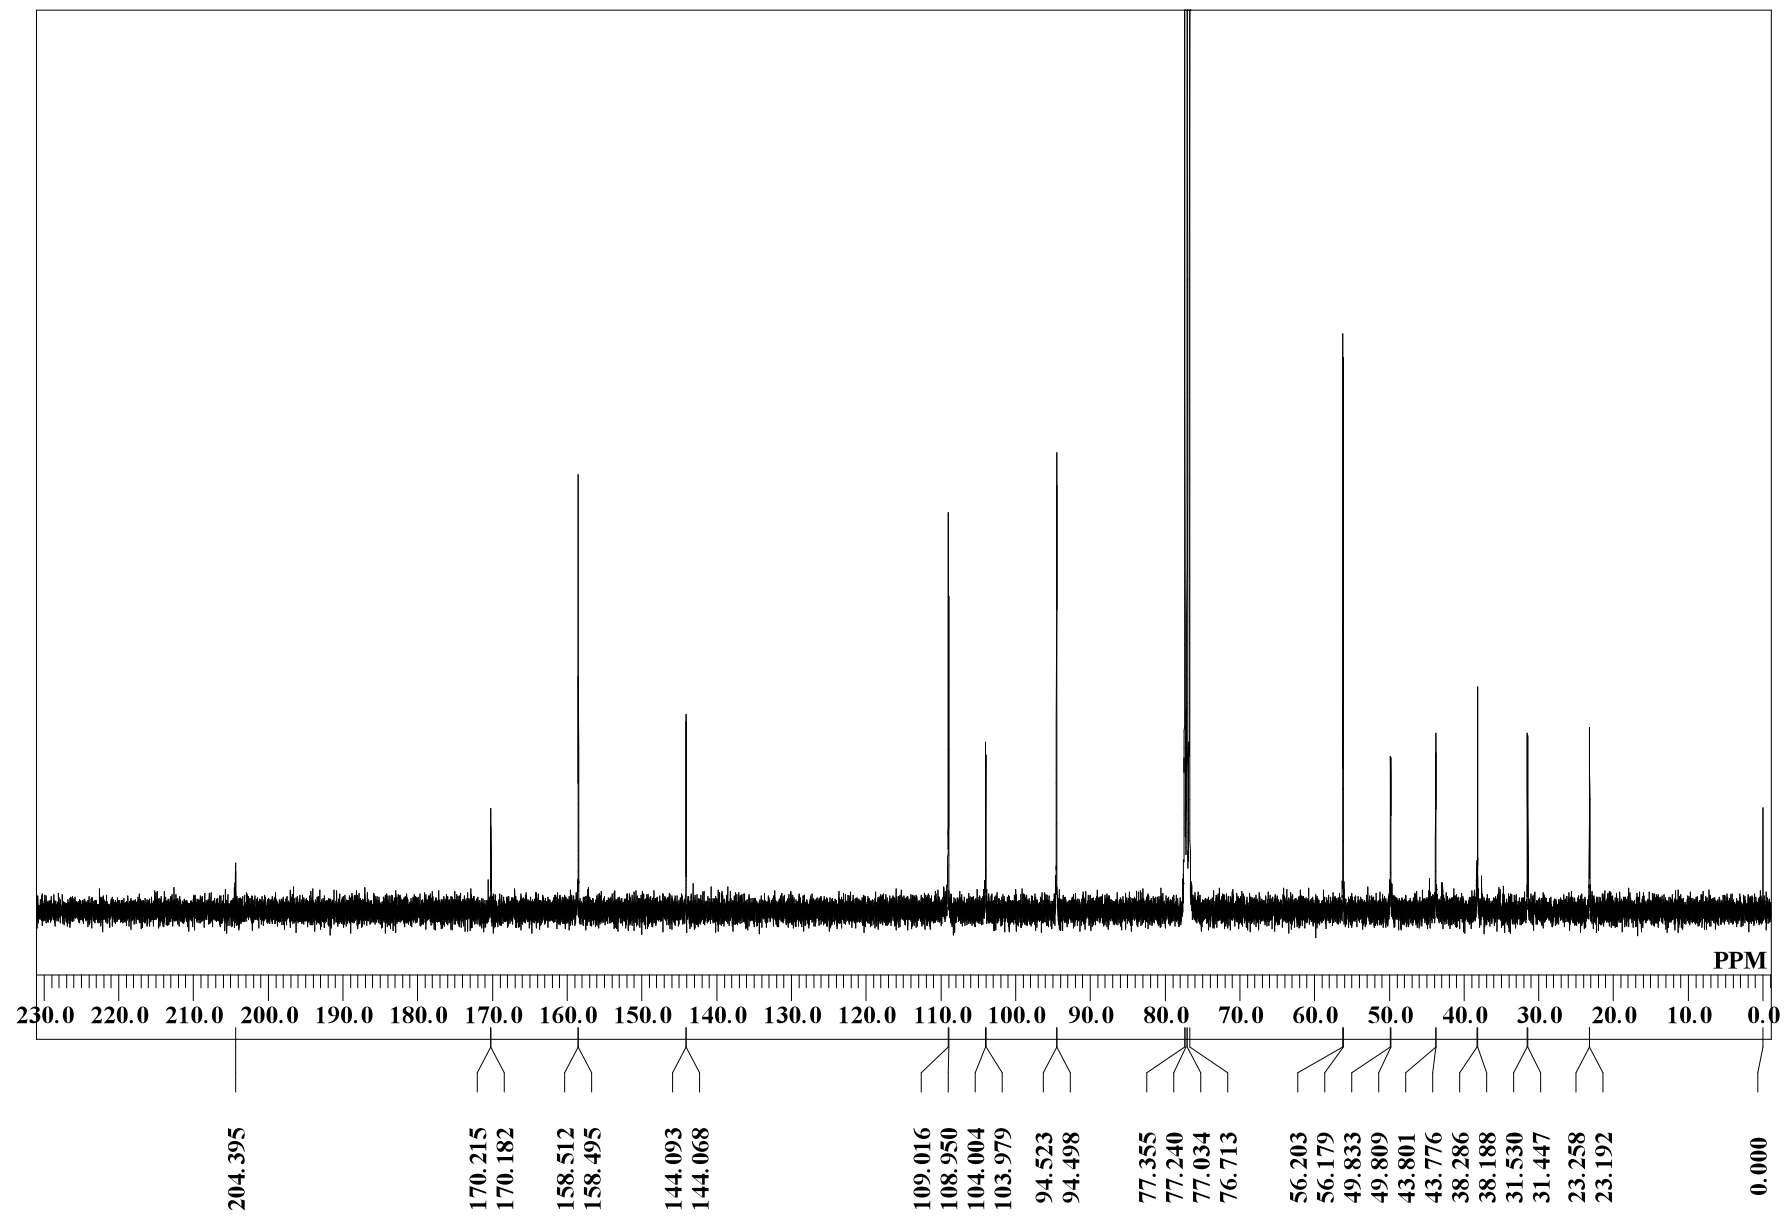

GO-Y140-1H

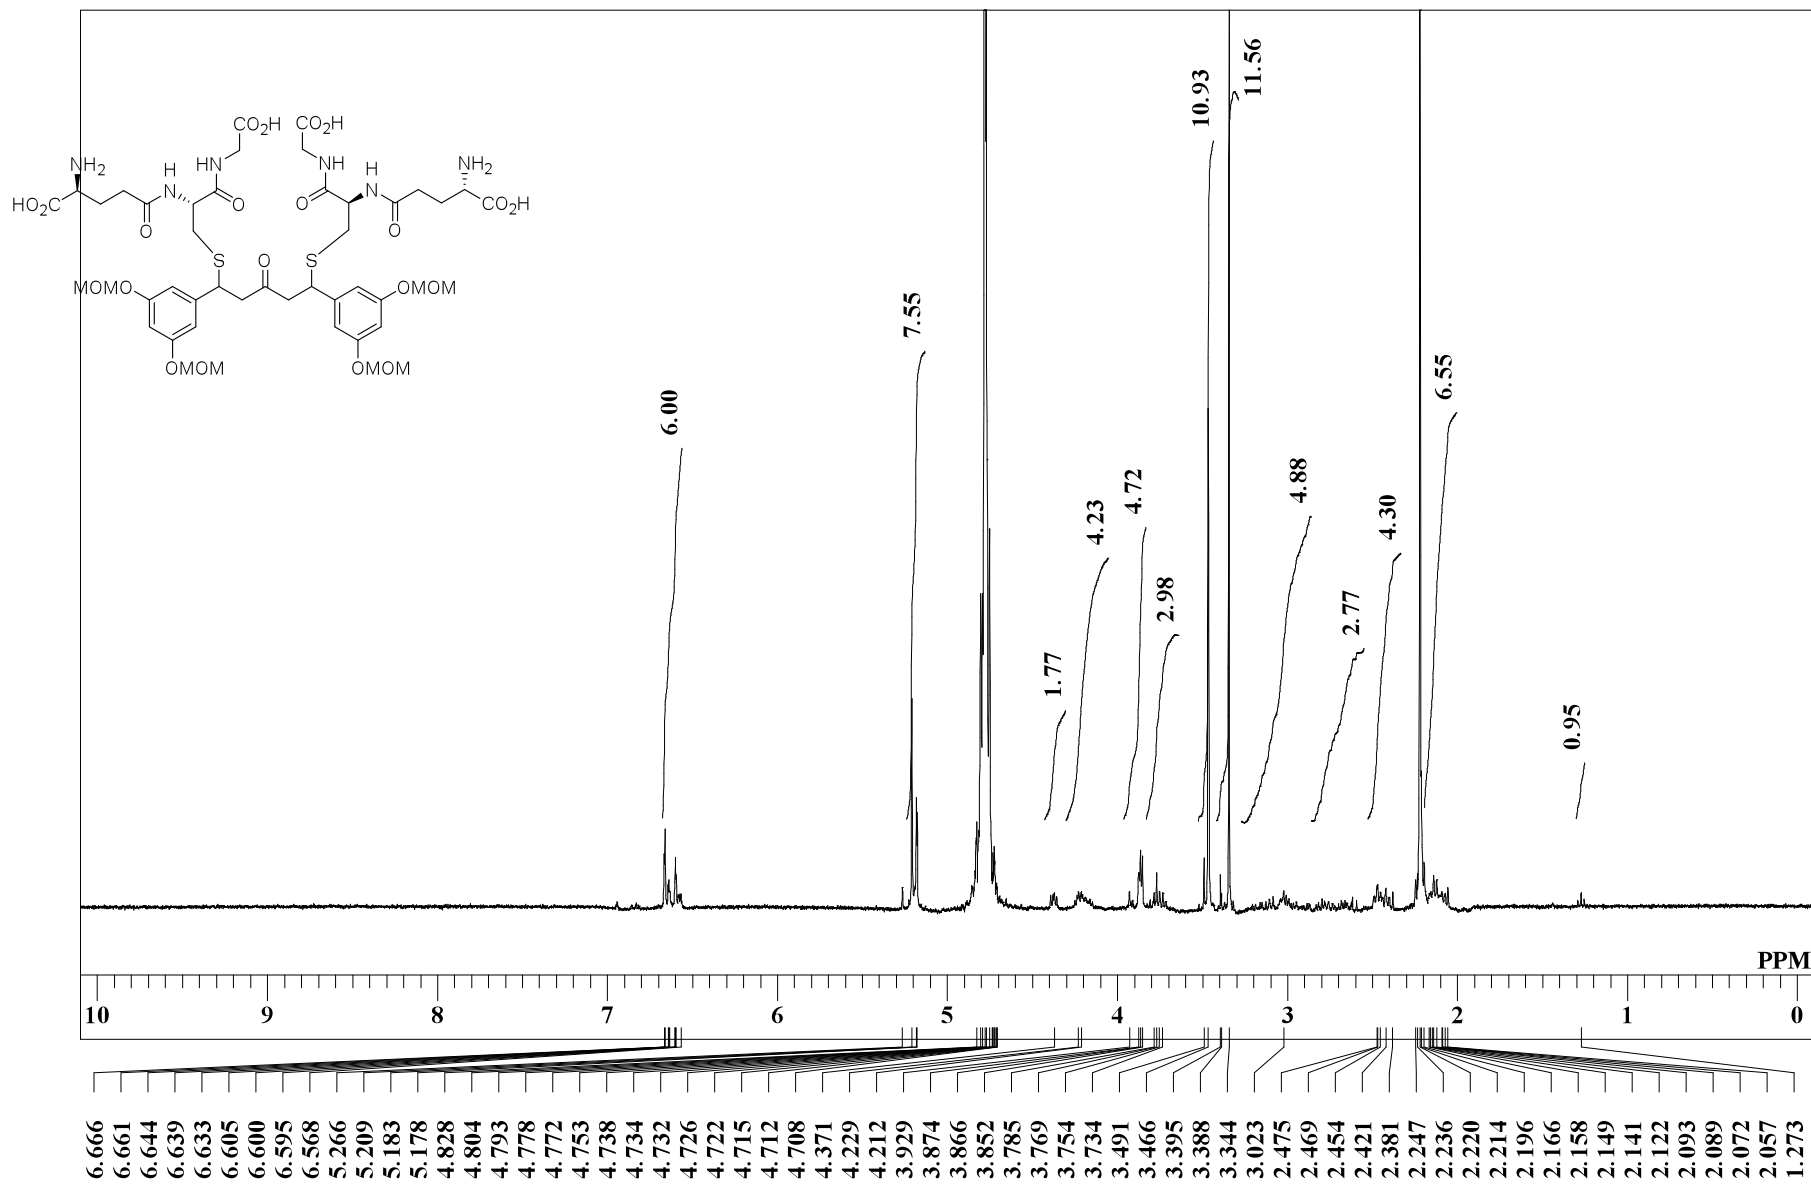



GO-Y140-13C

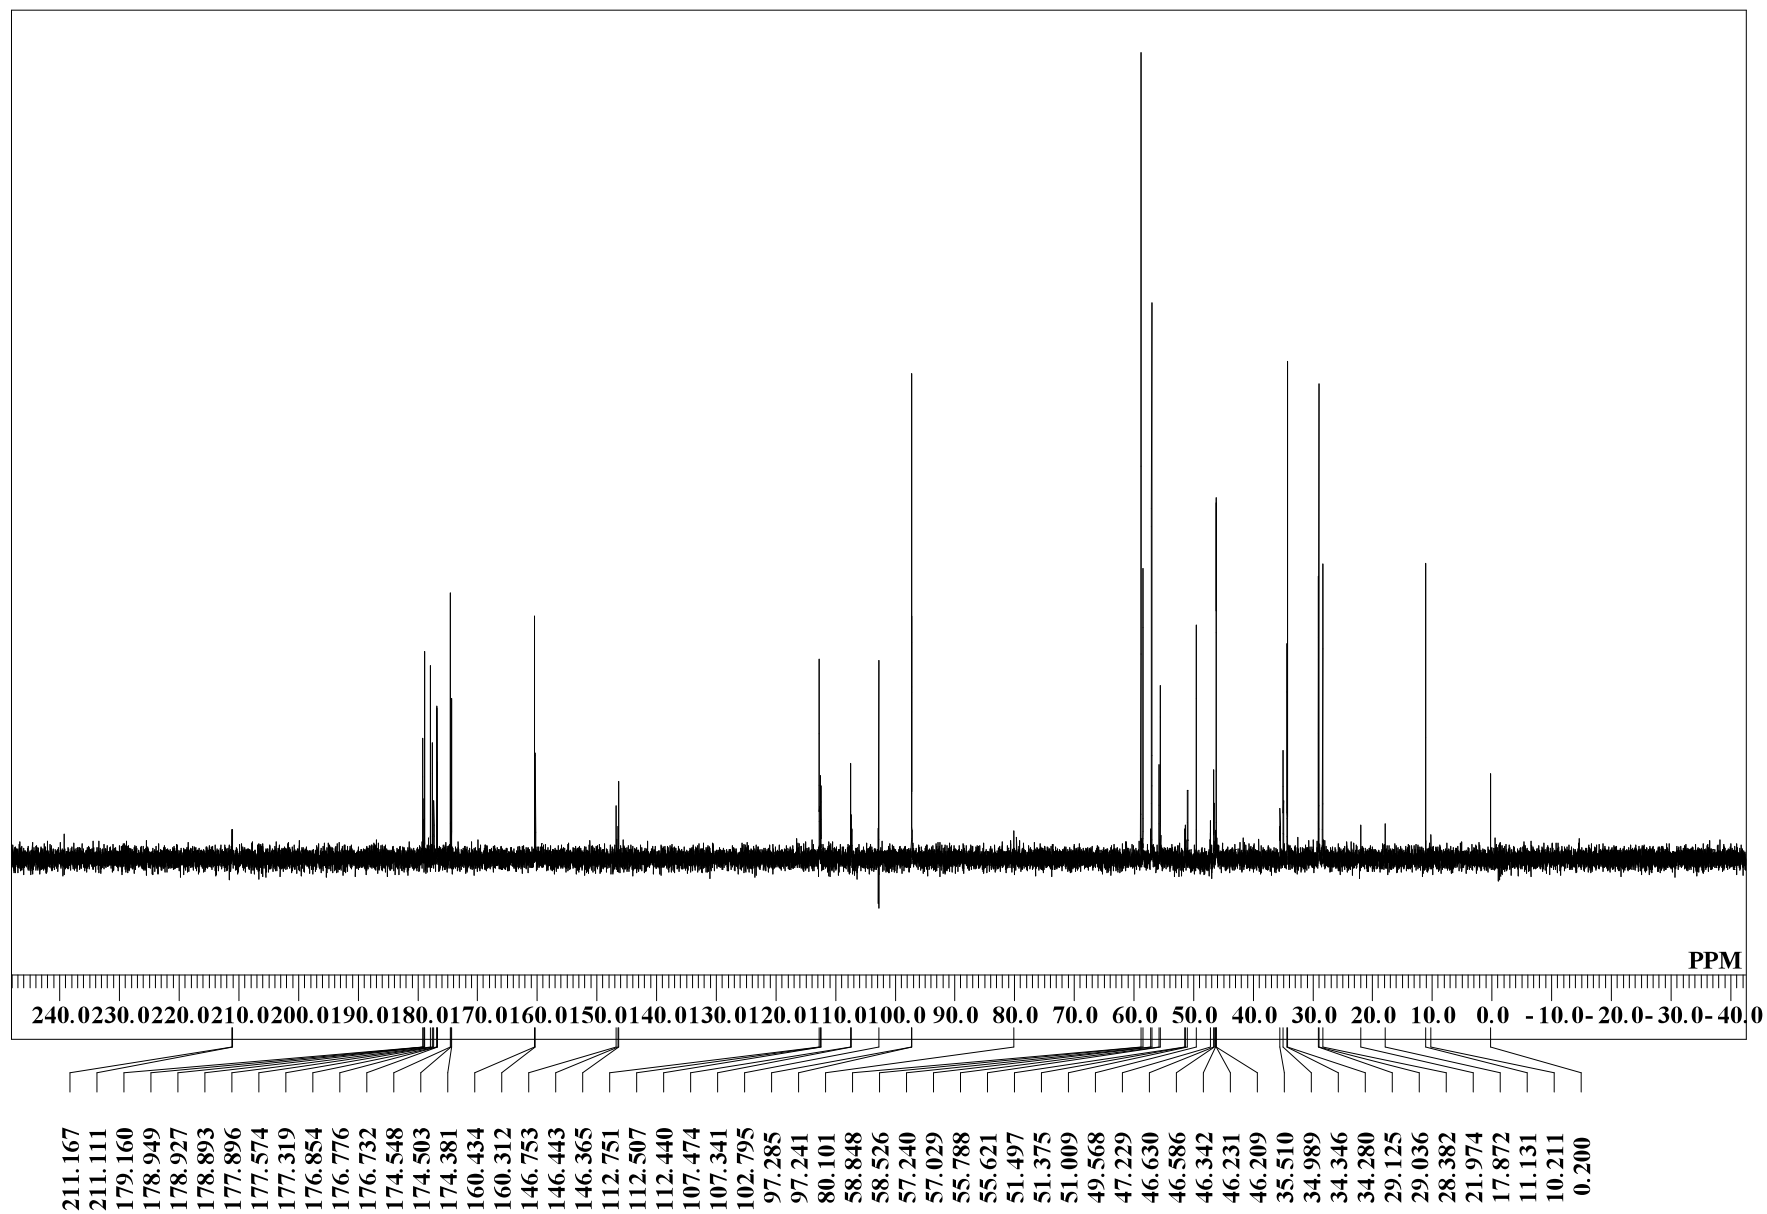

GO-Y173-1H

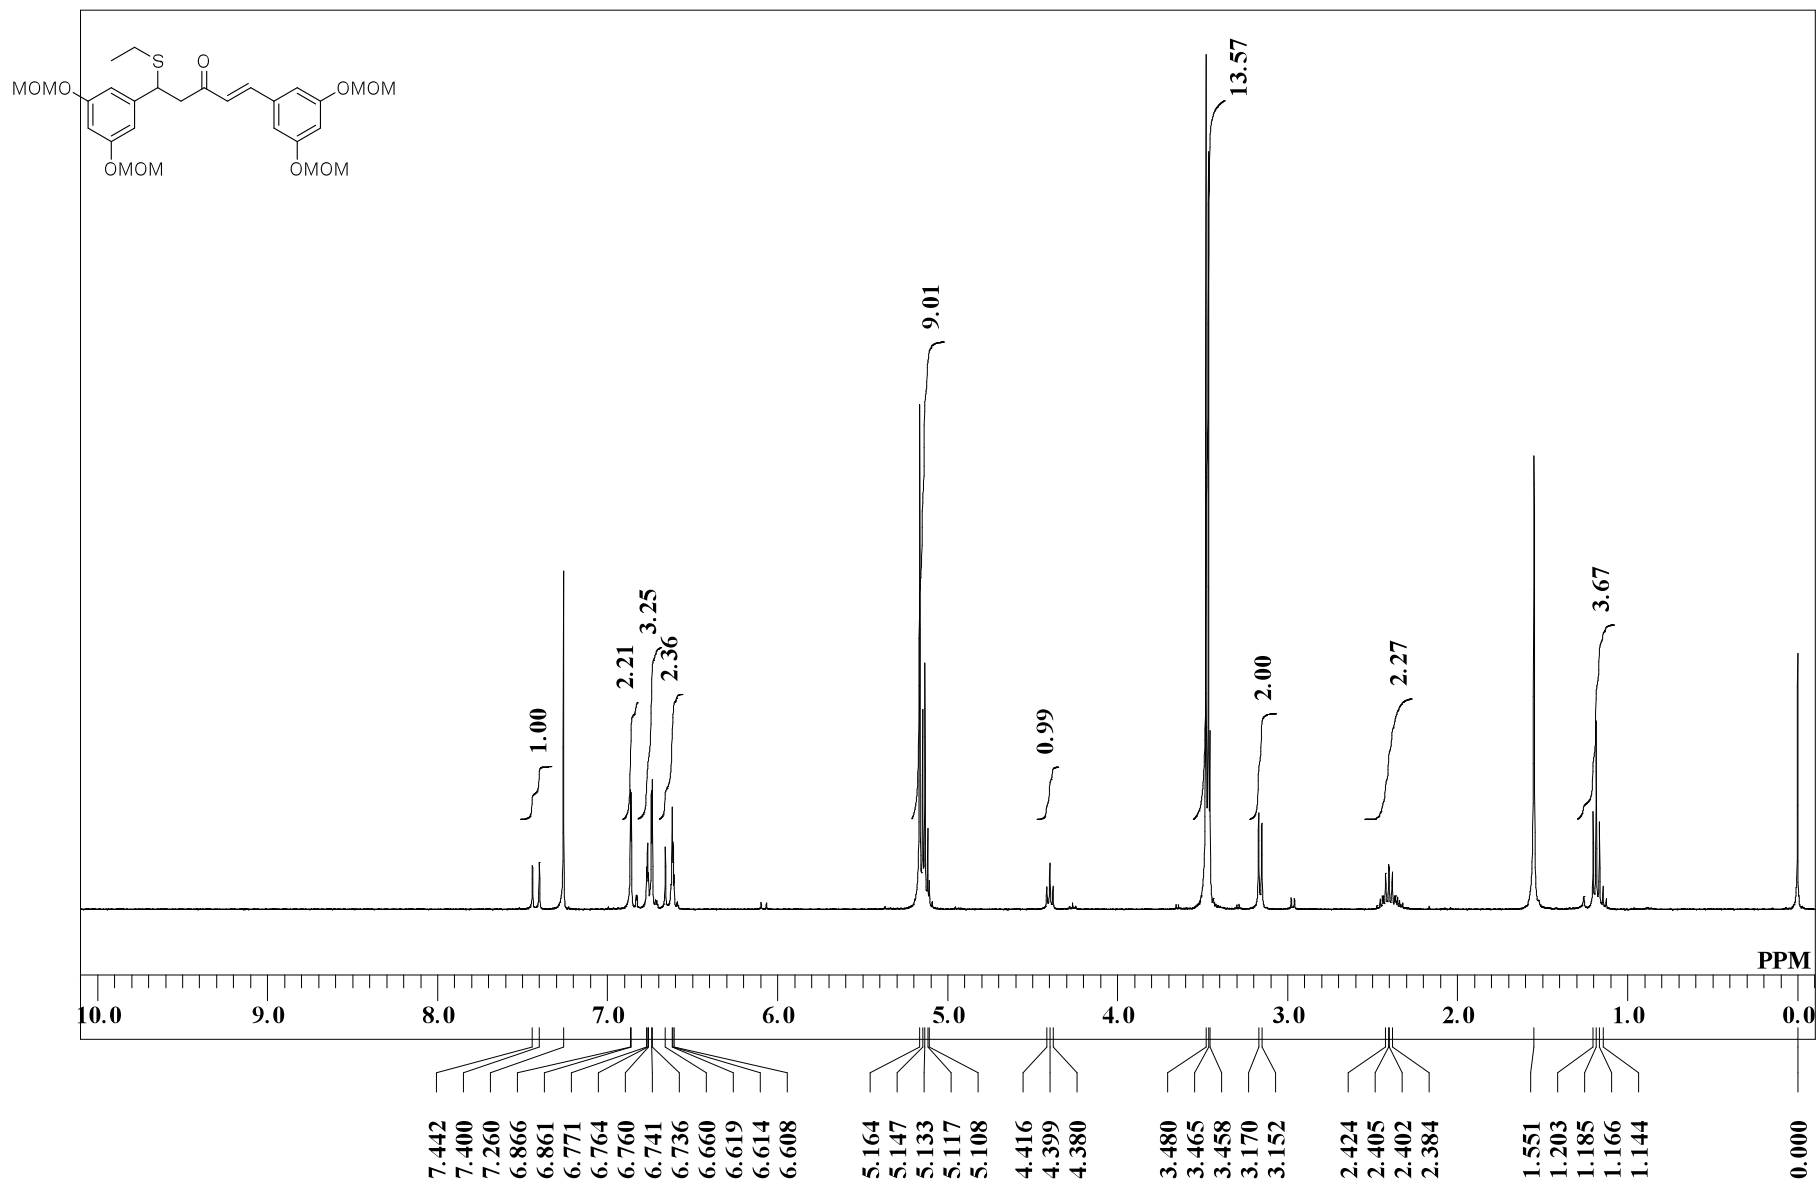

GO-Y173-13C

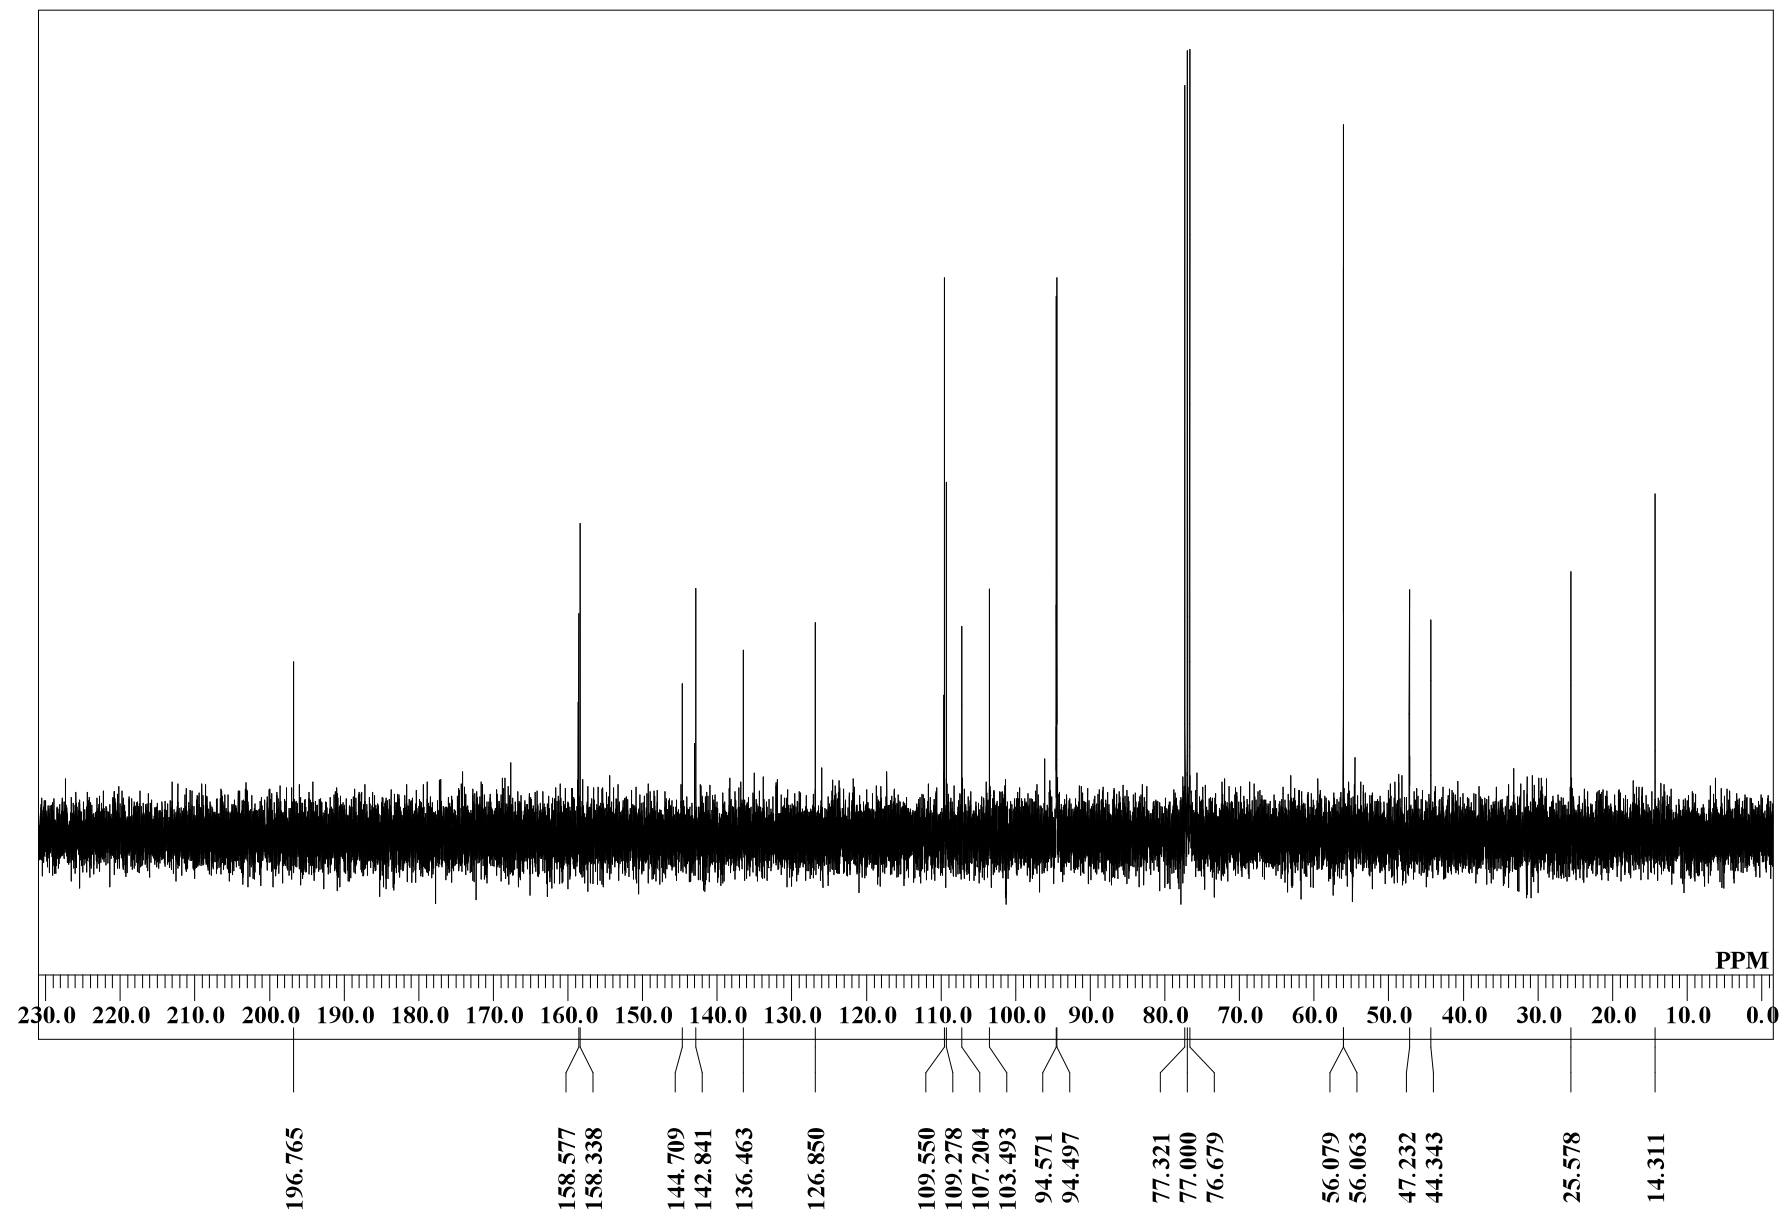

GO-Y174-1H

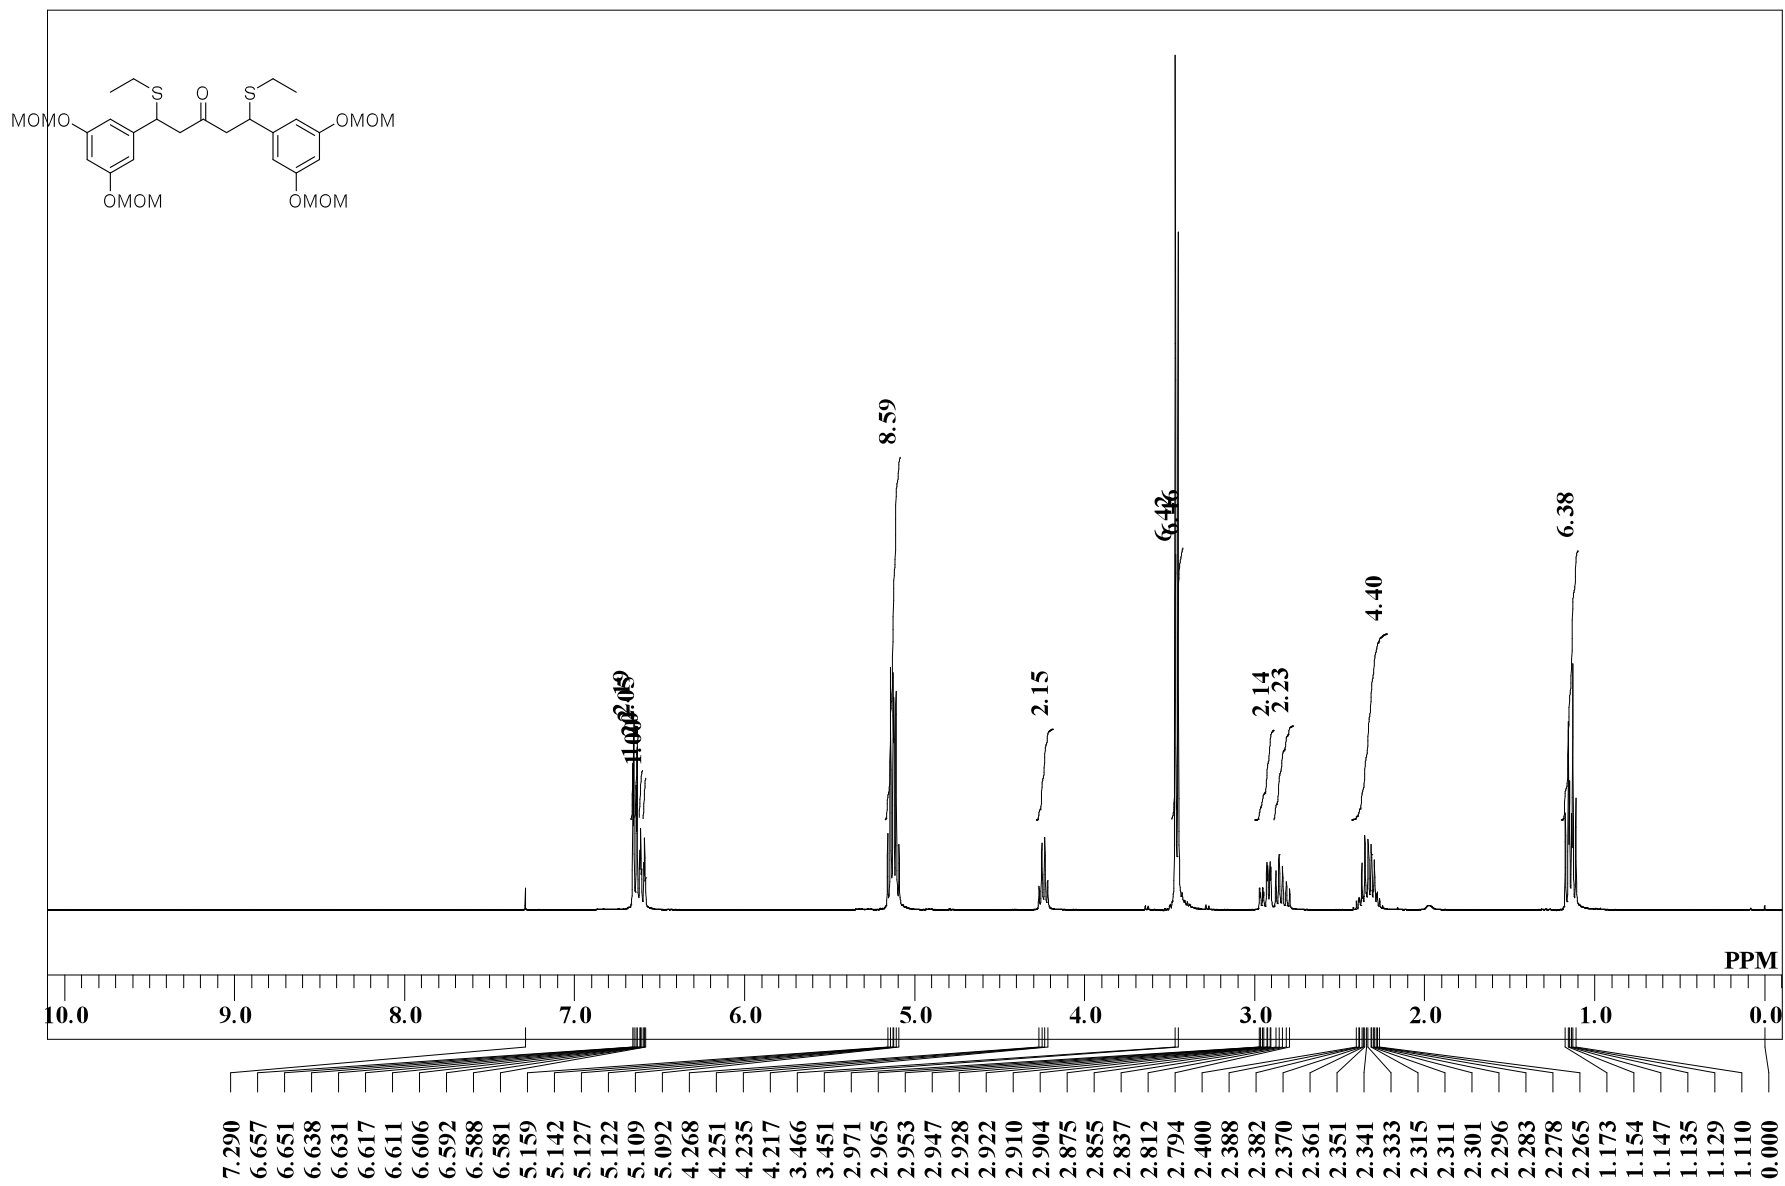

GO-Y174-13C

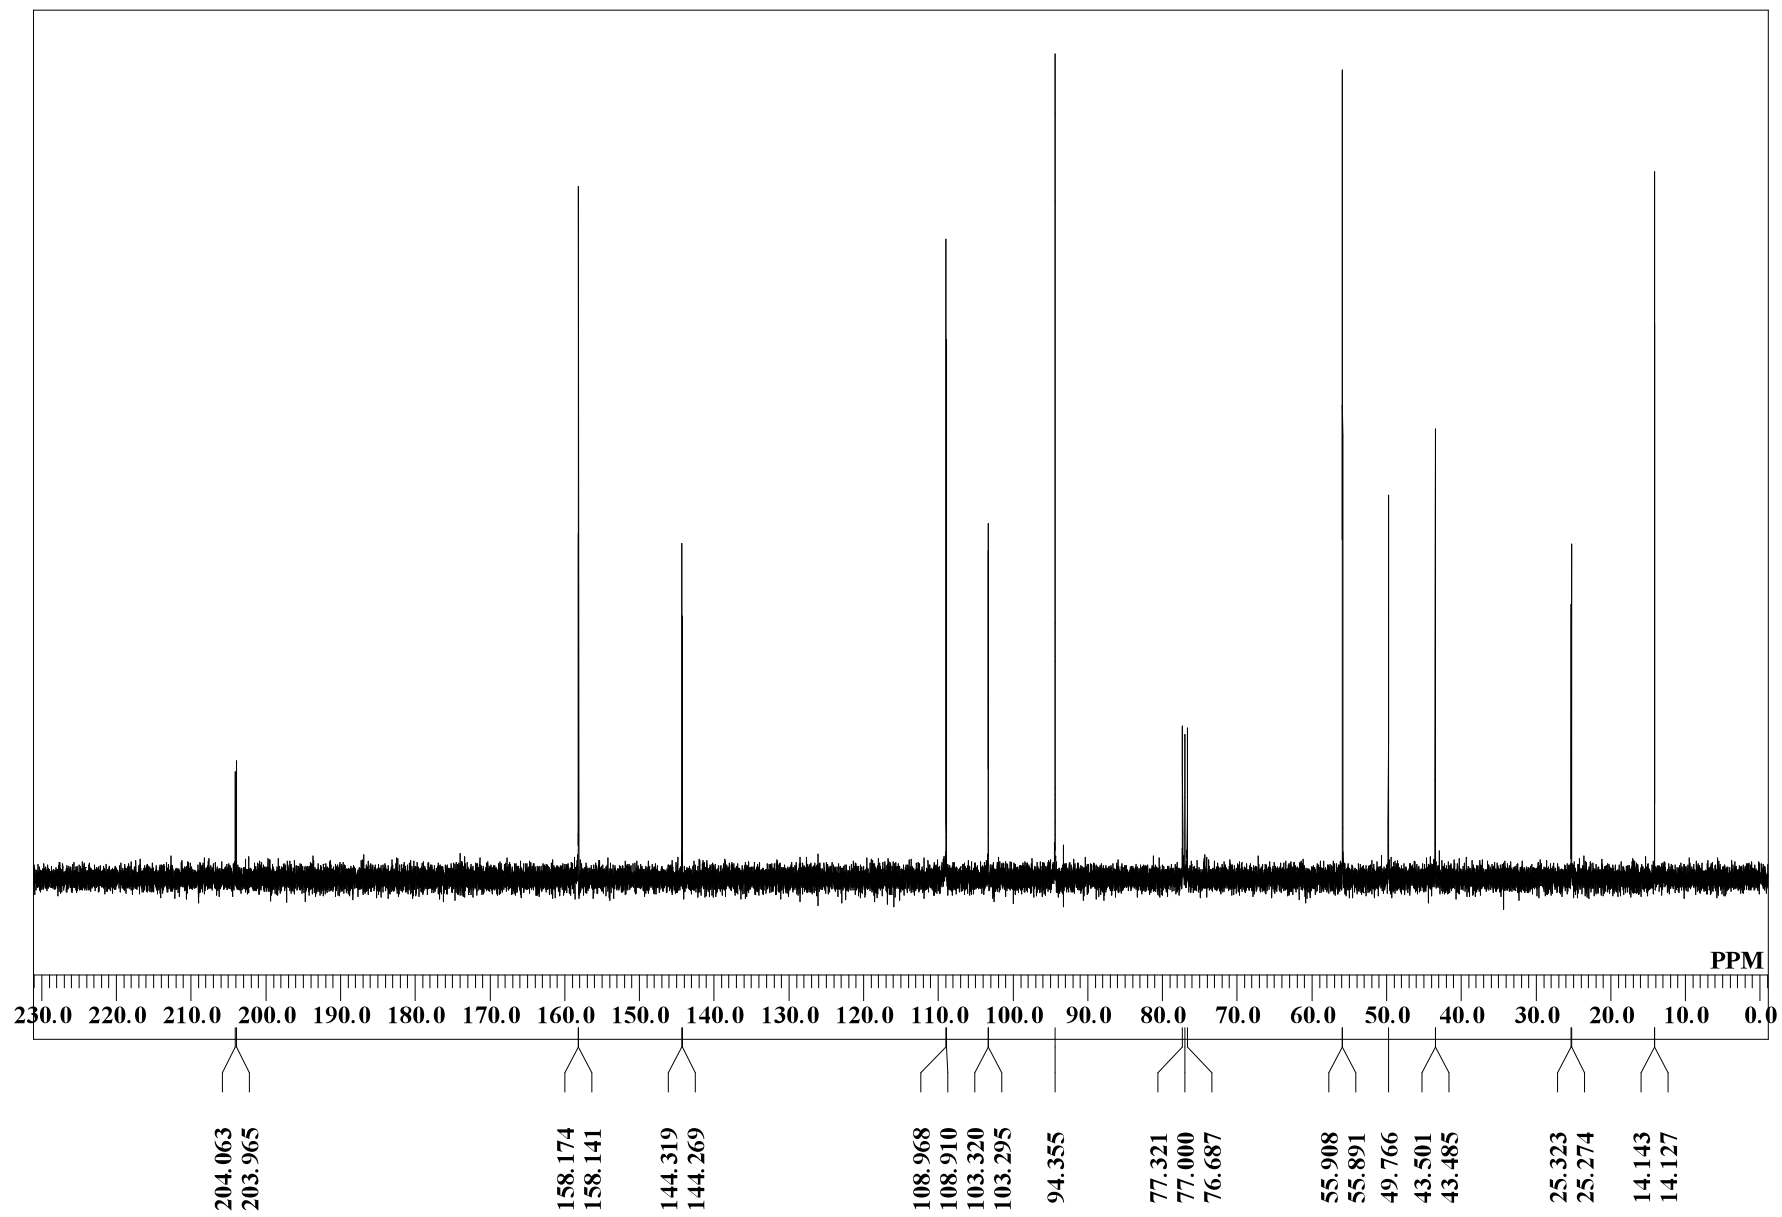



GO-Y-175-13C

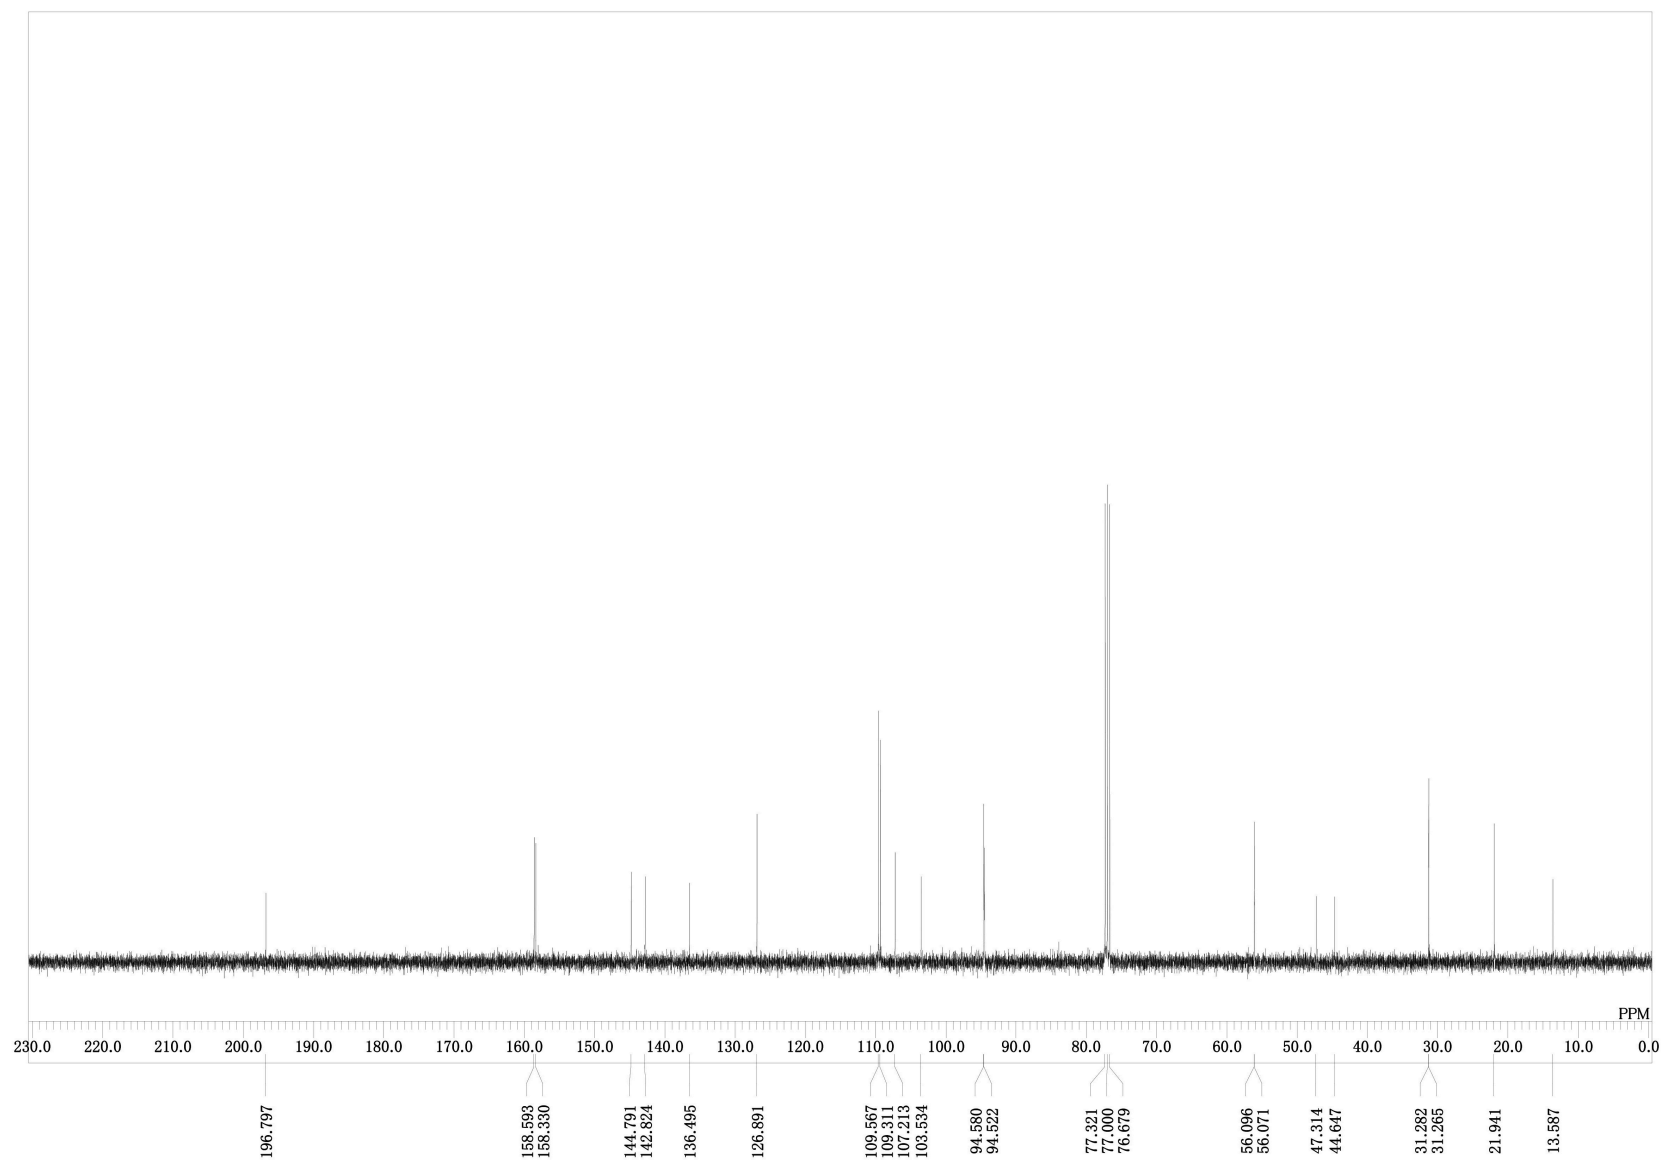

GO-Y176-1H

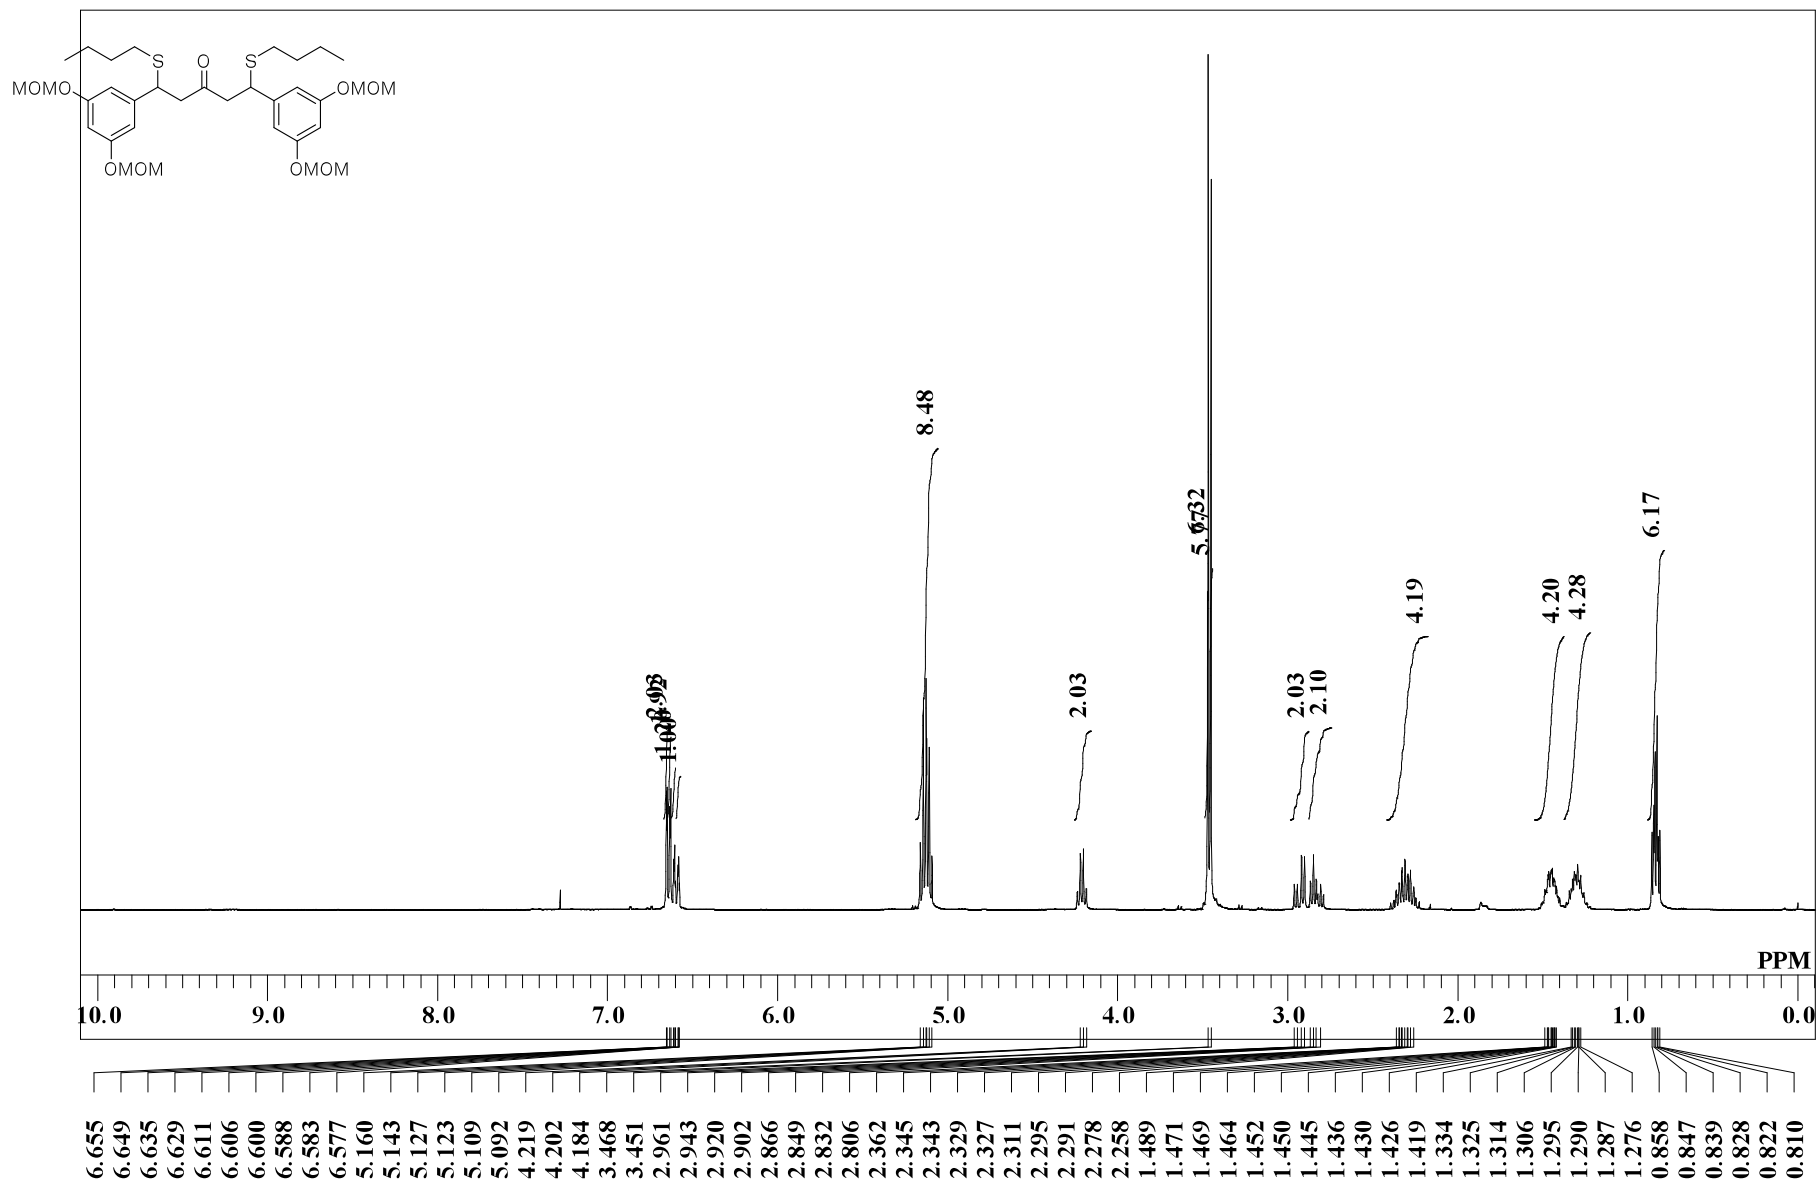



GO-Y176-13C

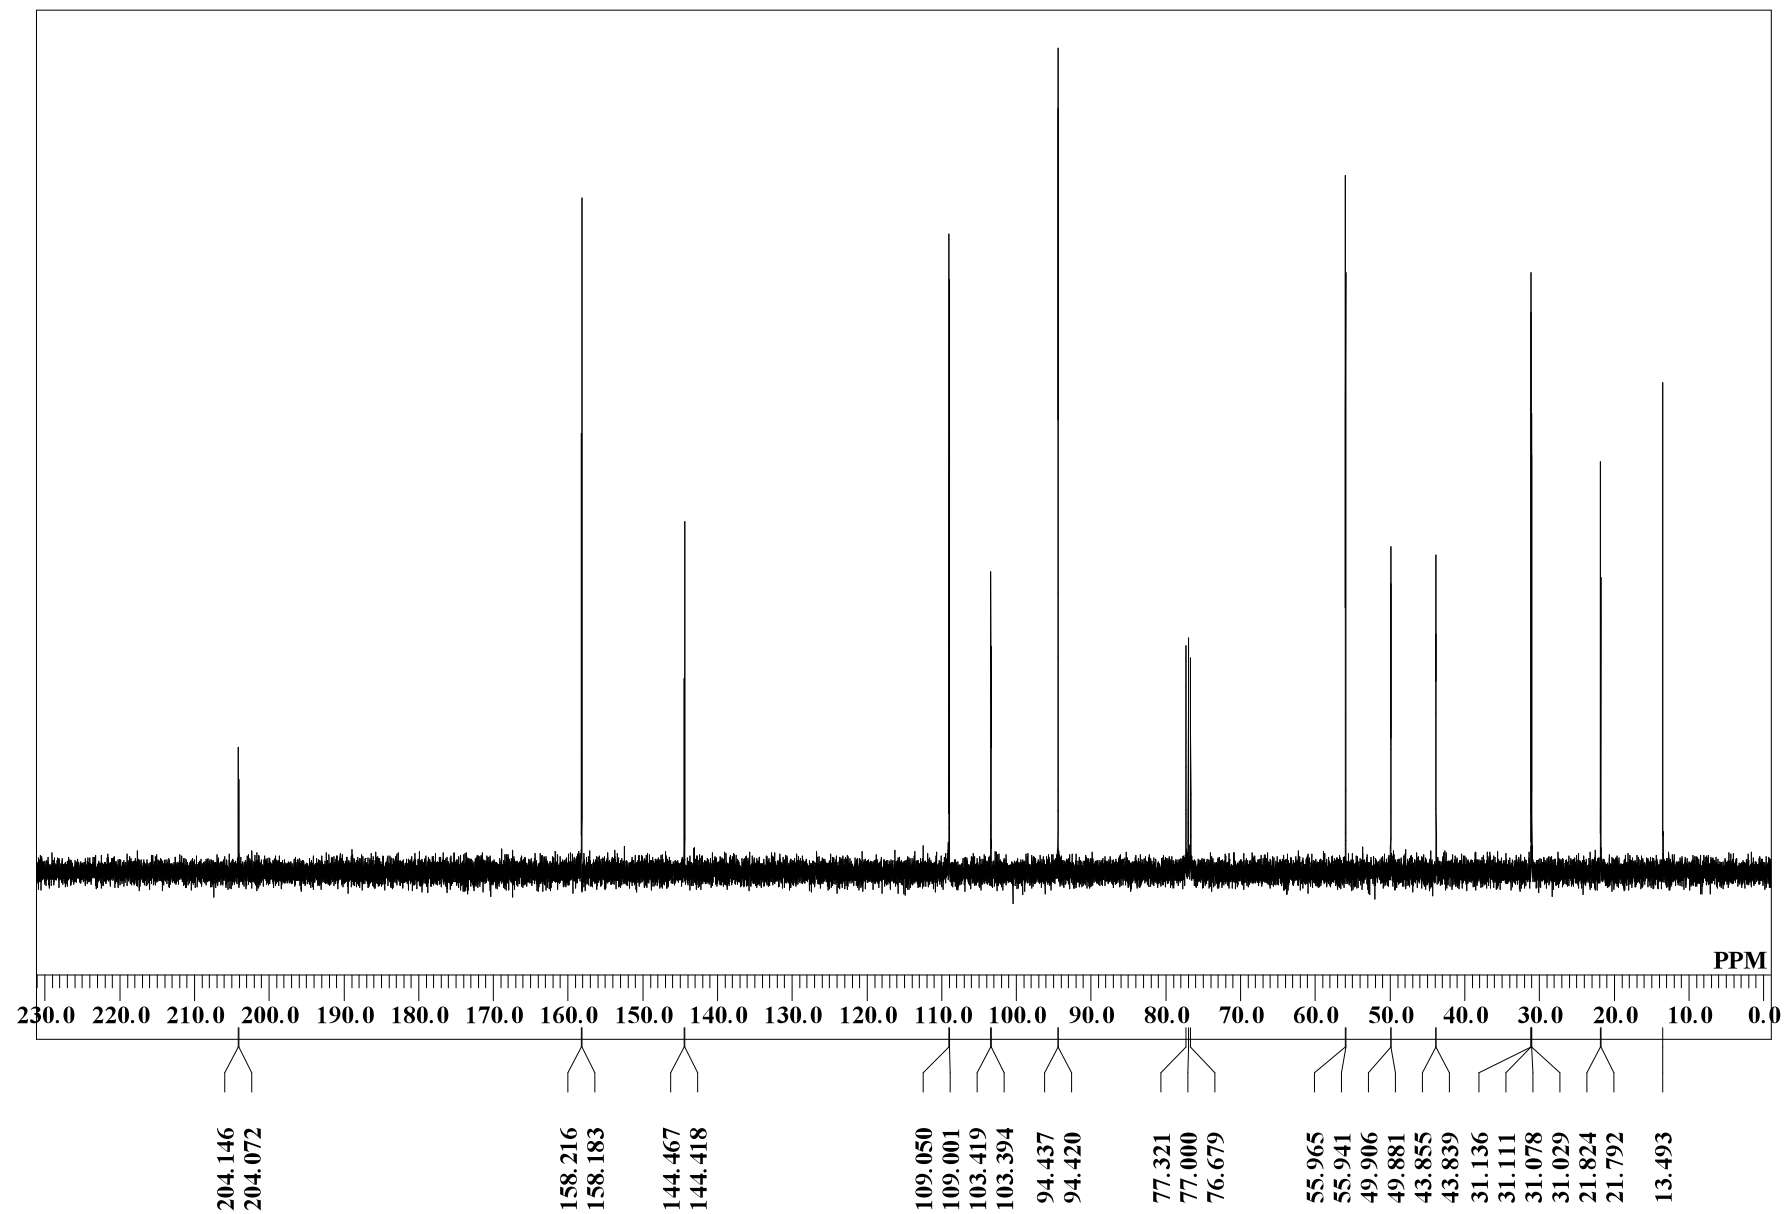

GO-Y177-1H

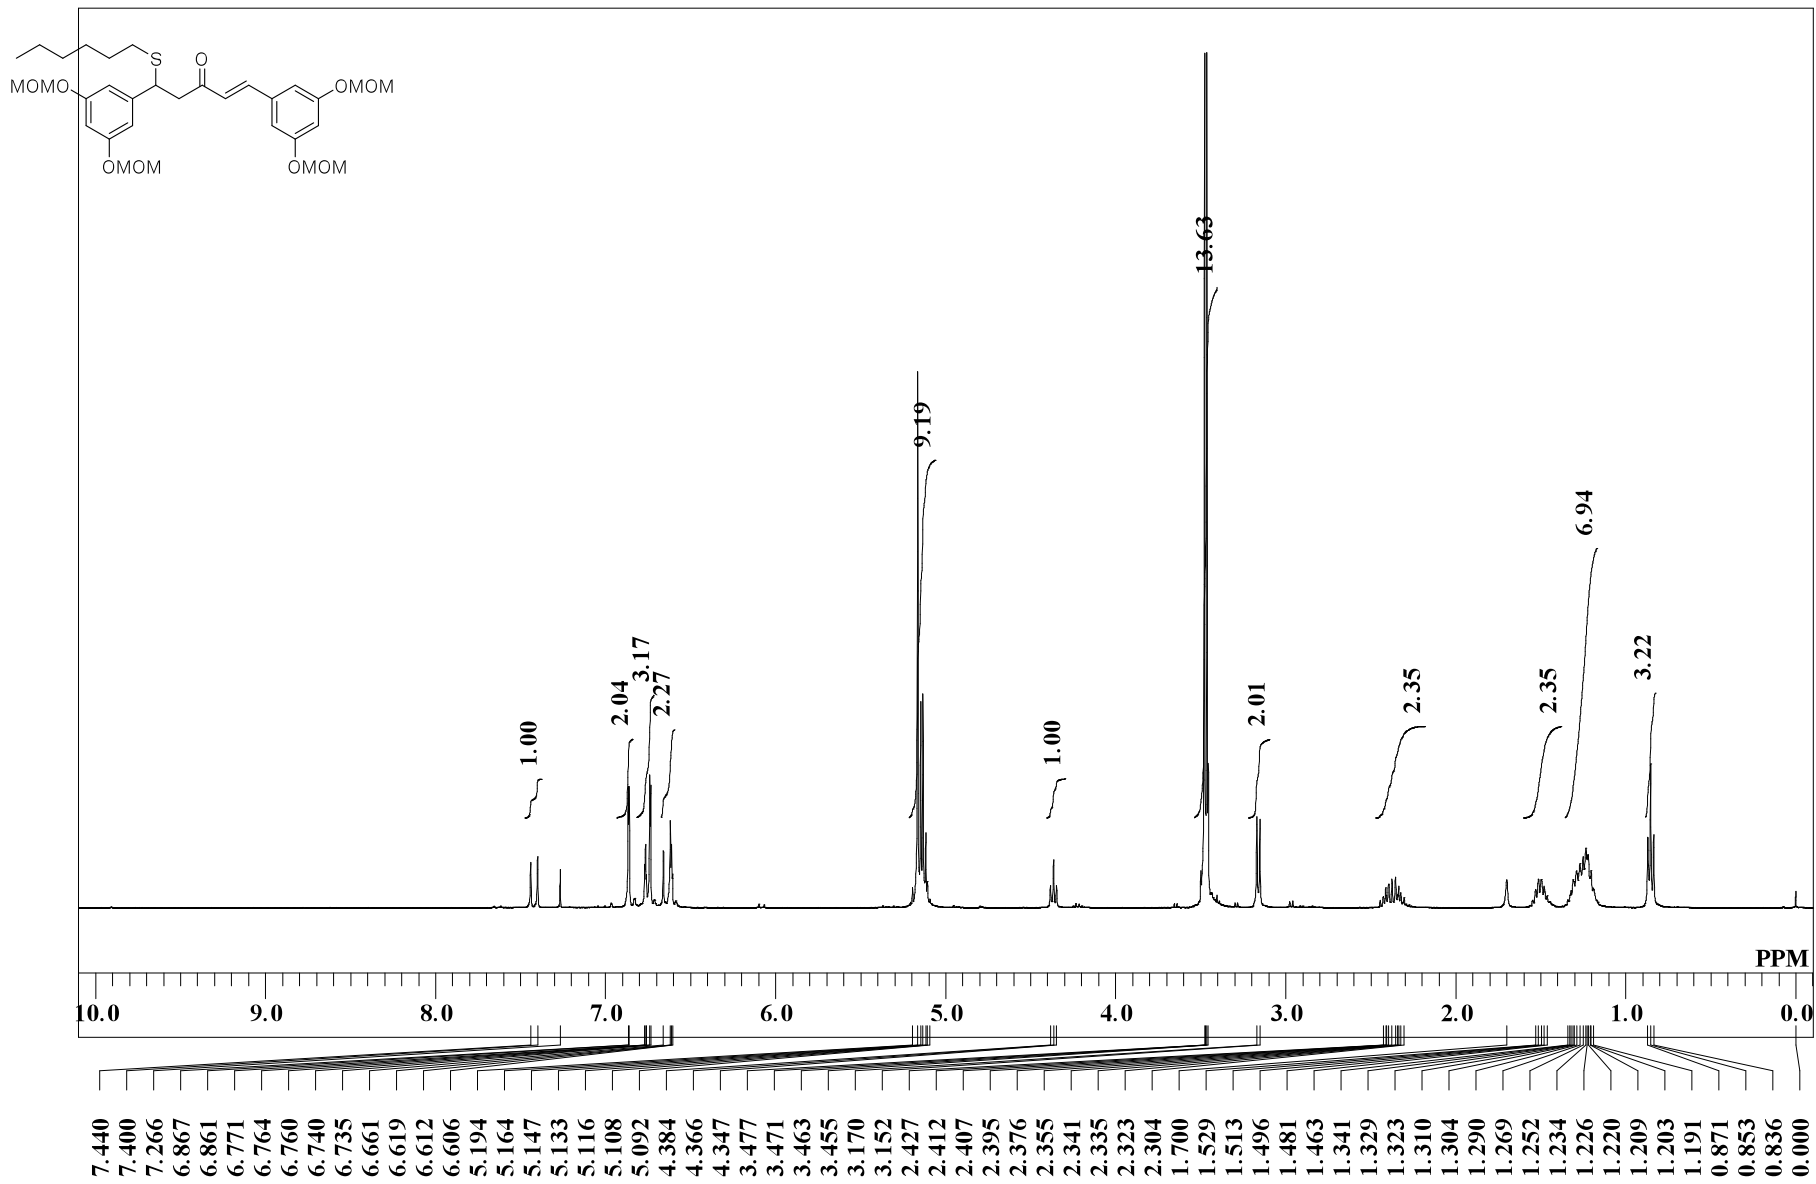

GO-177-13C

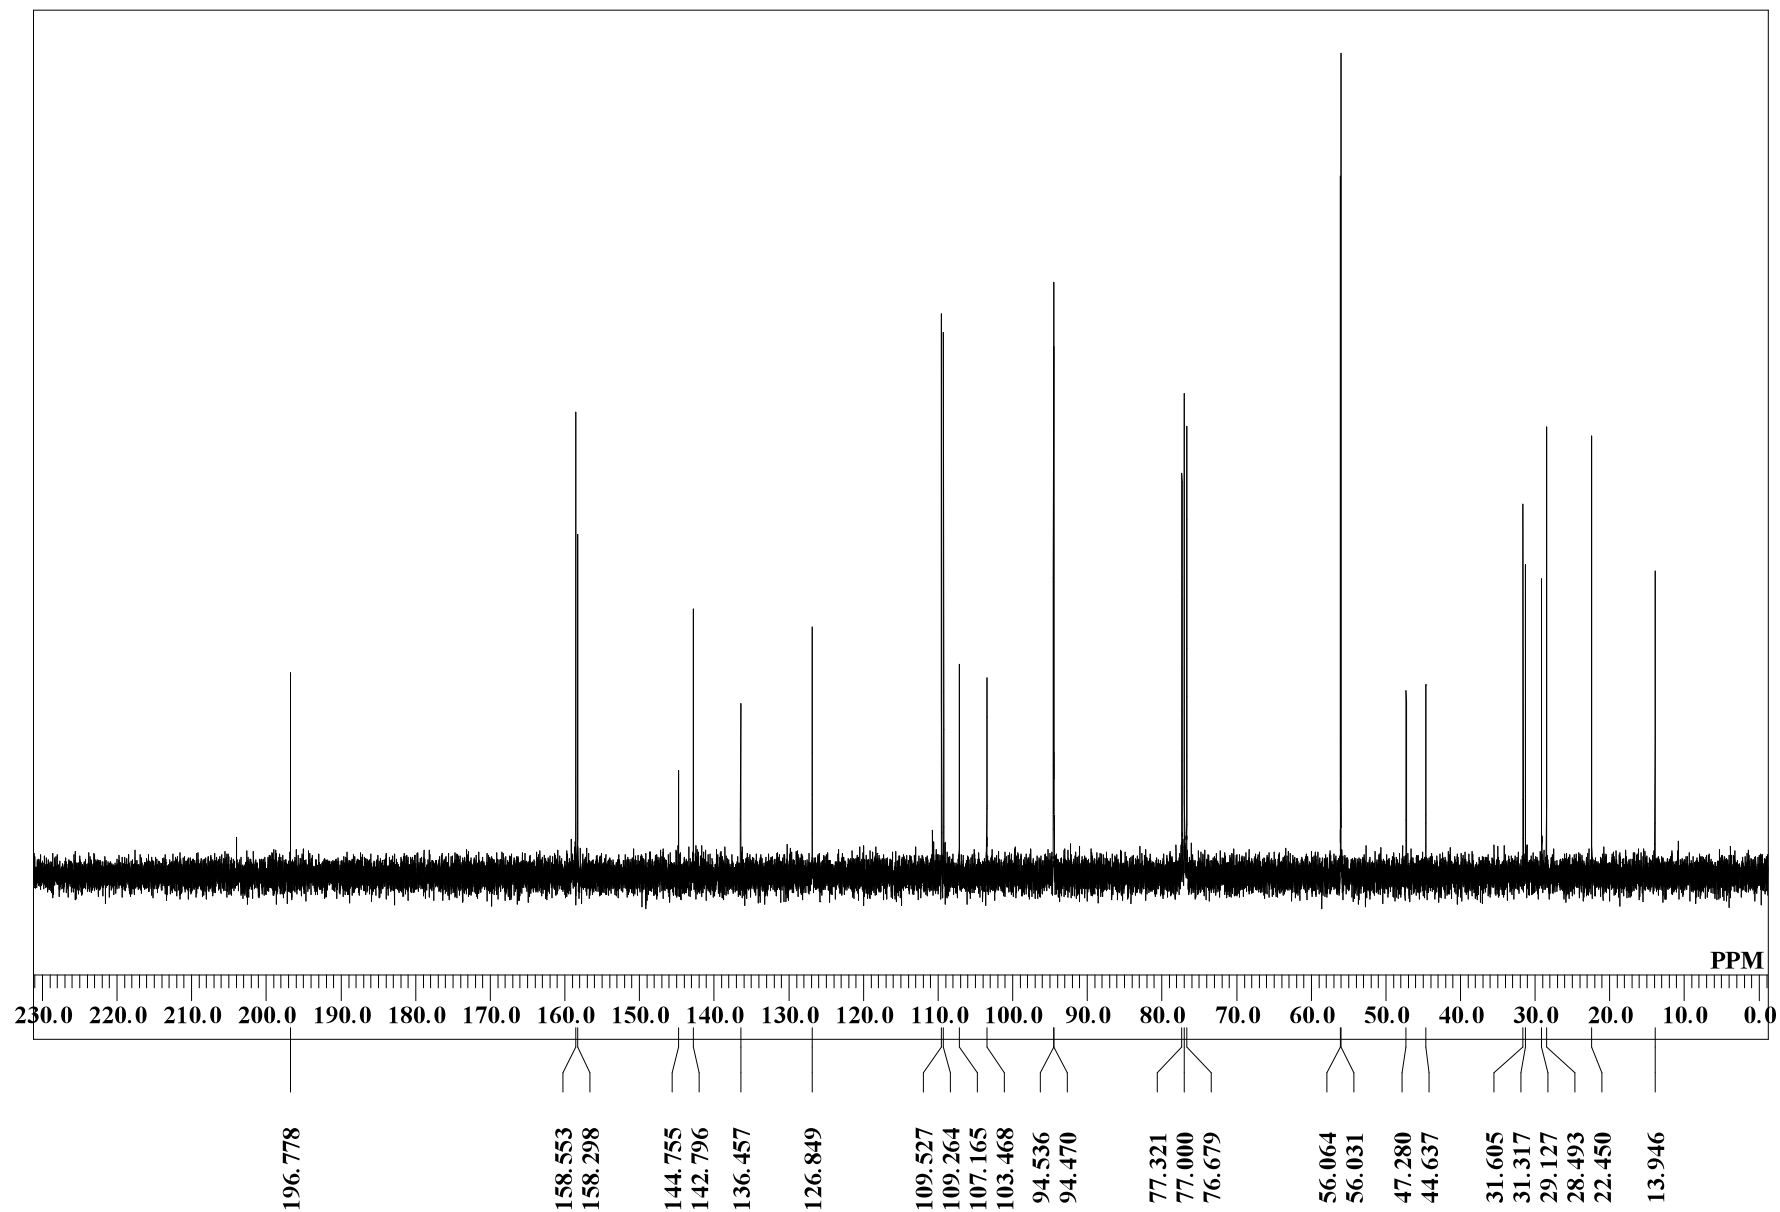

GO-Y178-1H

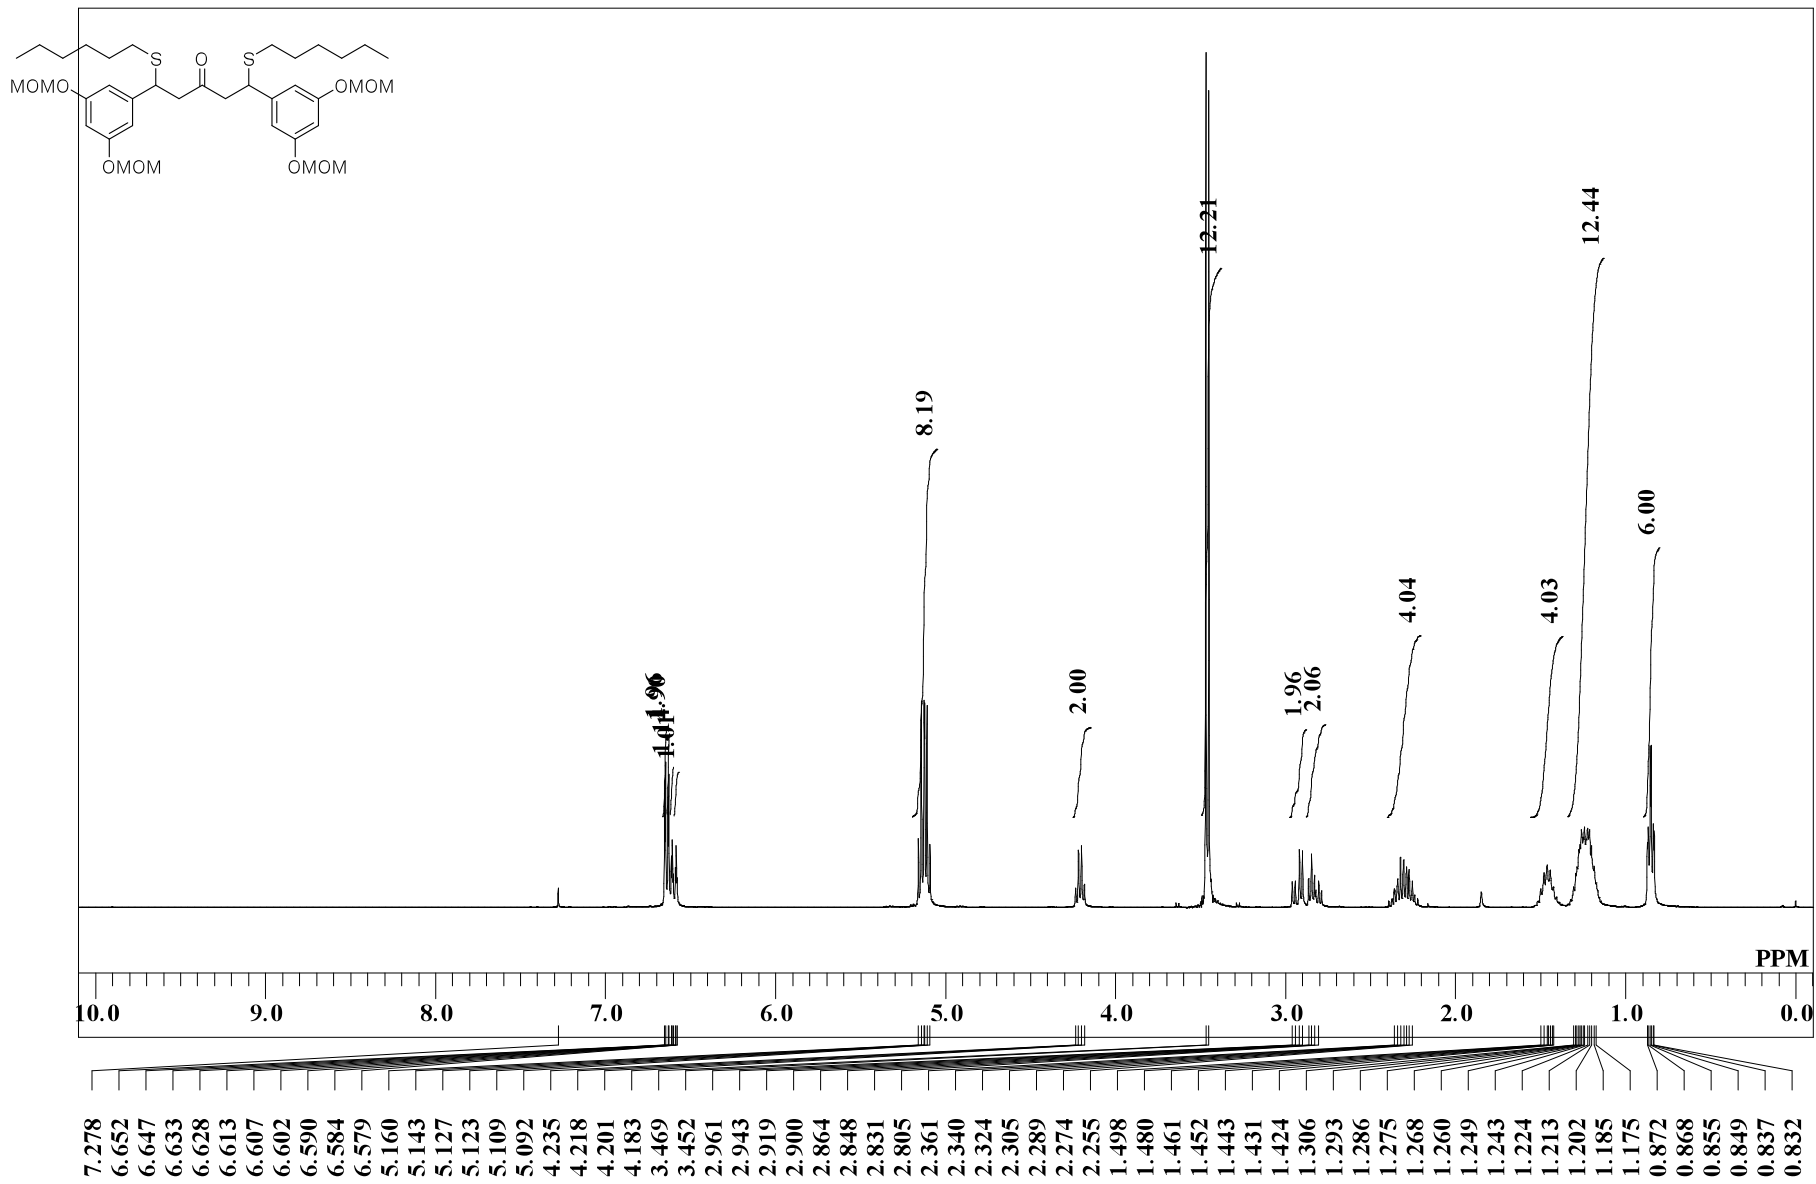

GO-Y178-13C

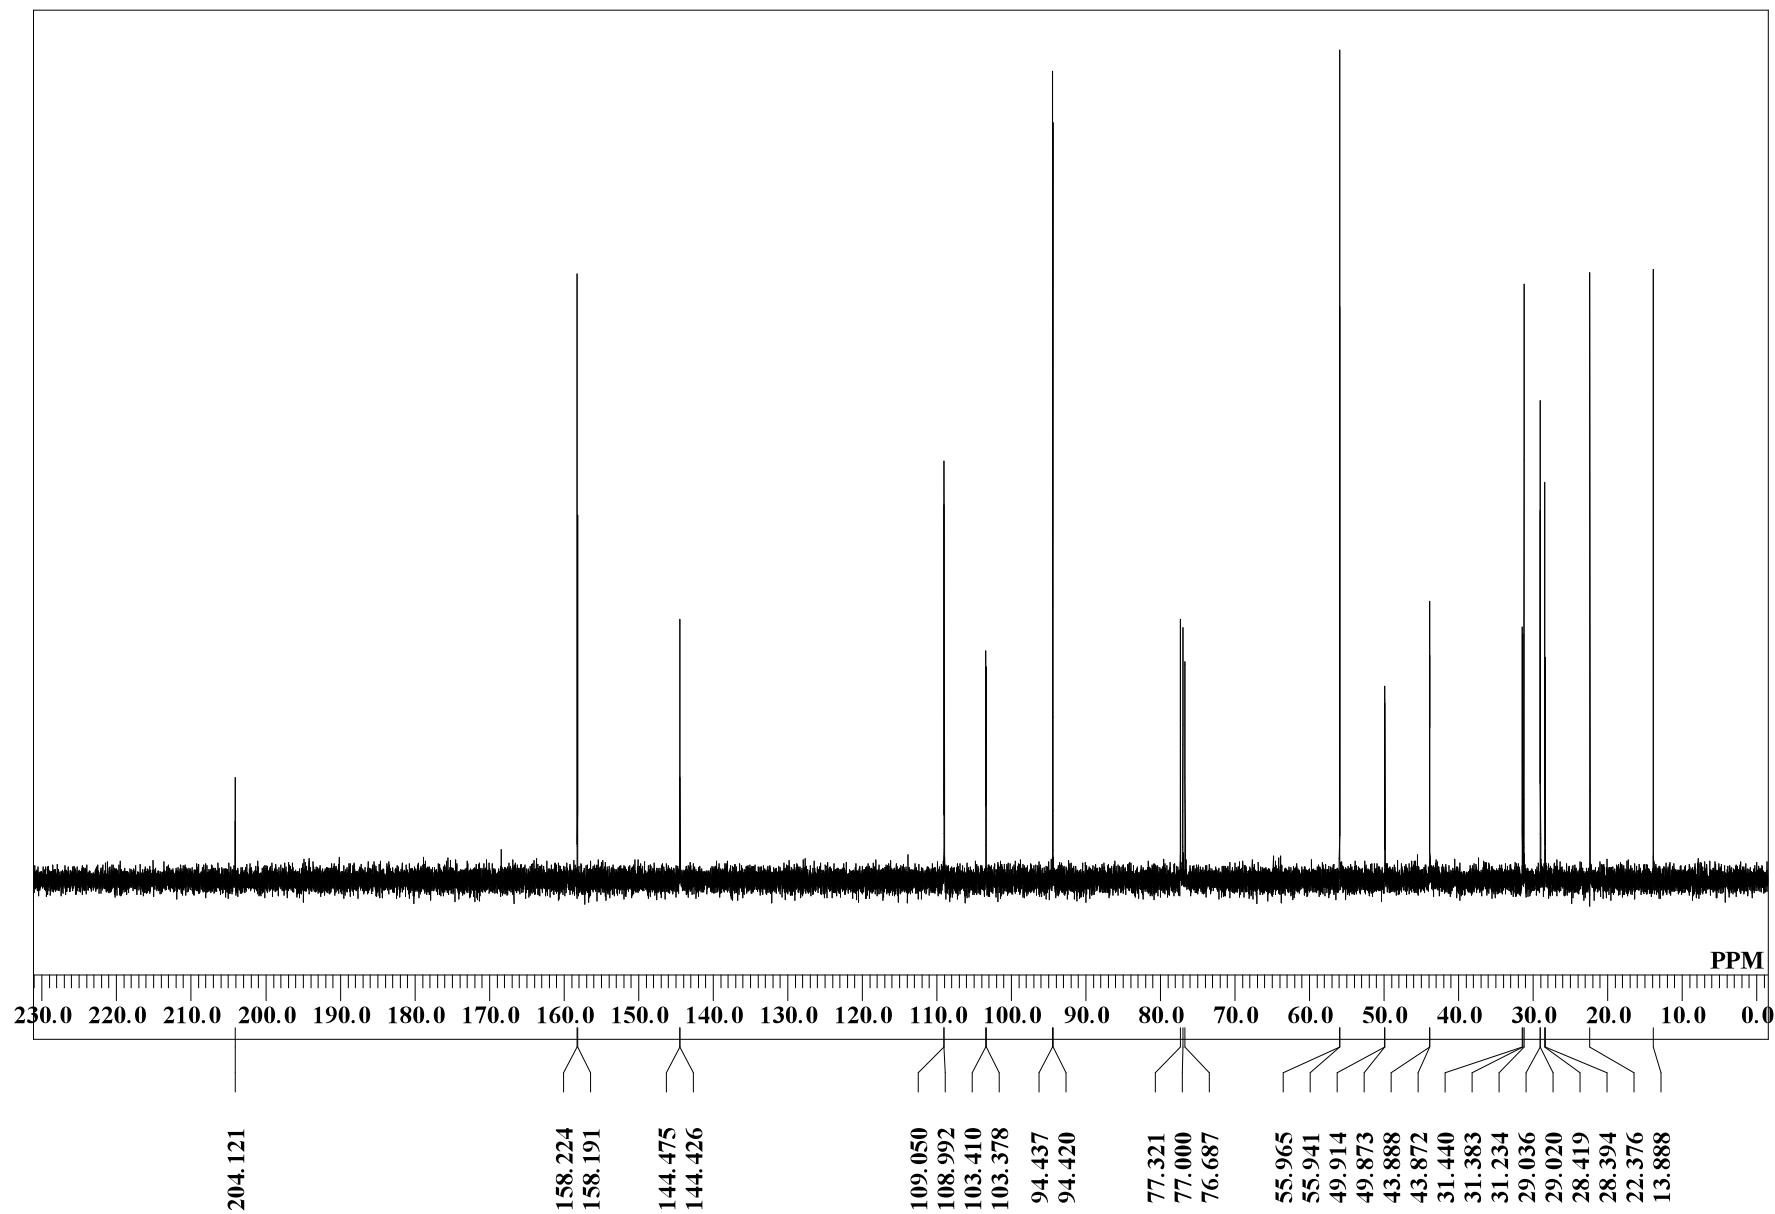

GO-Y143-1H

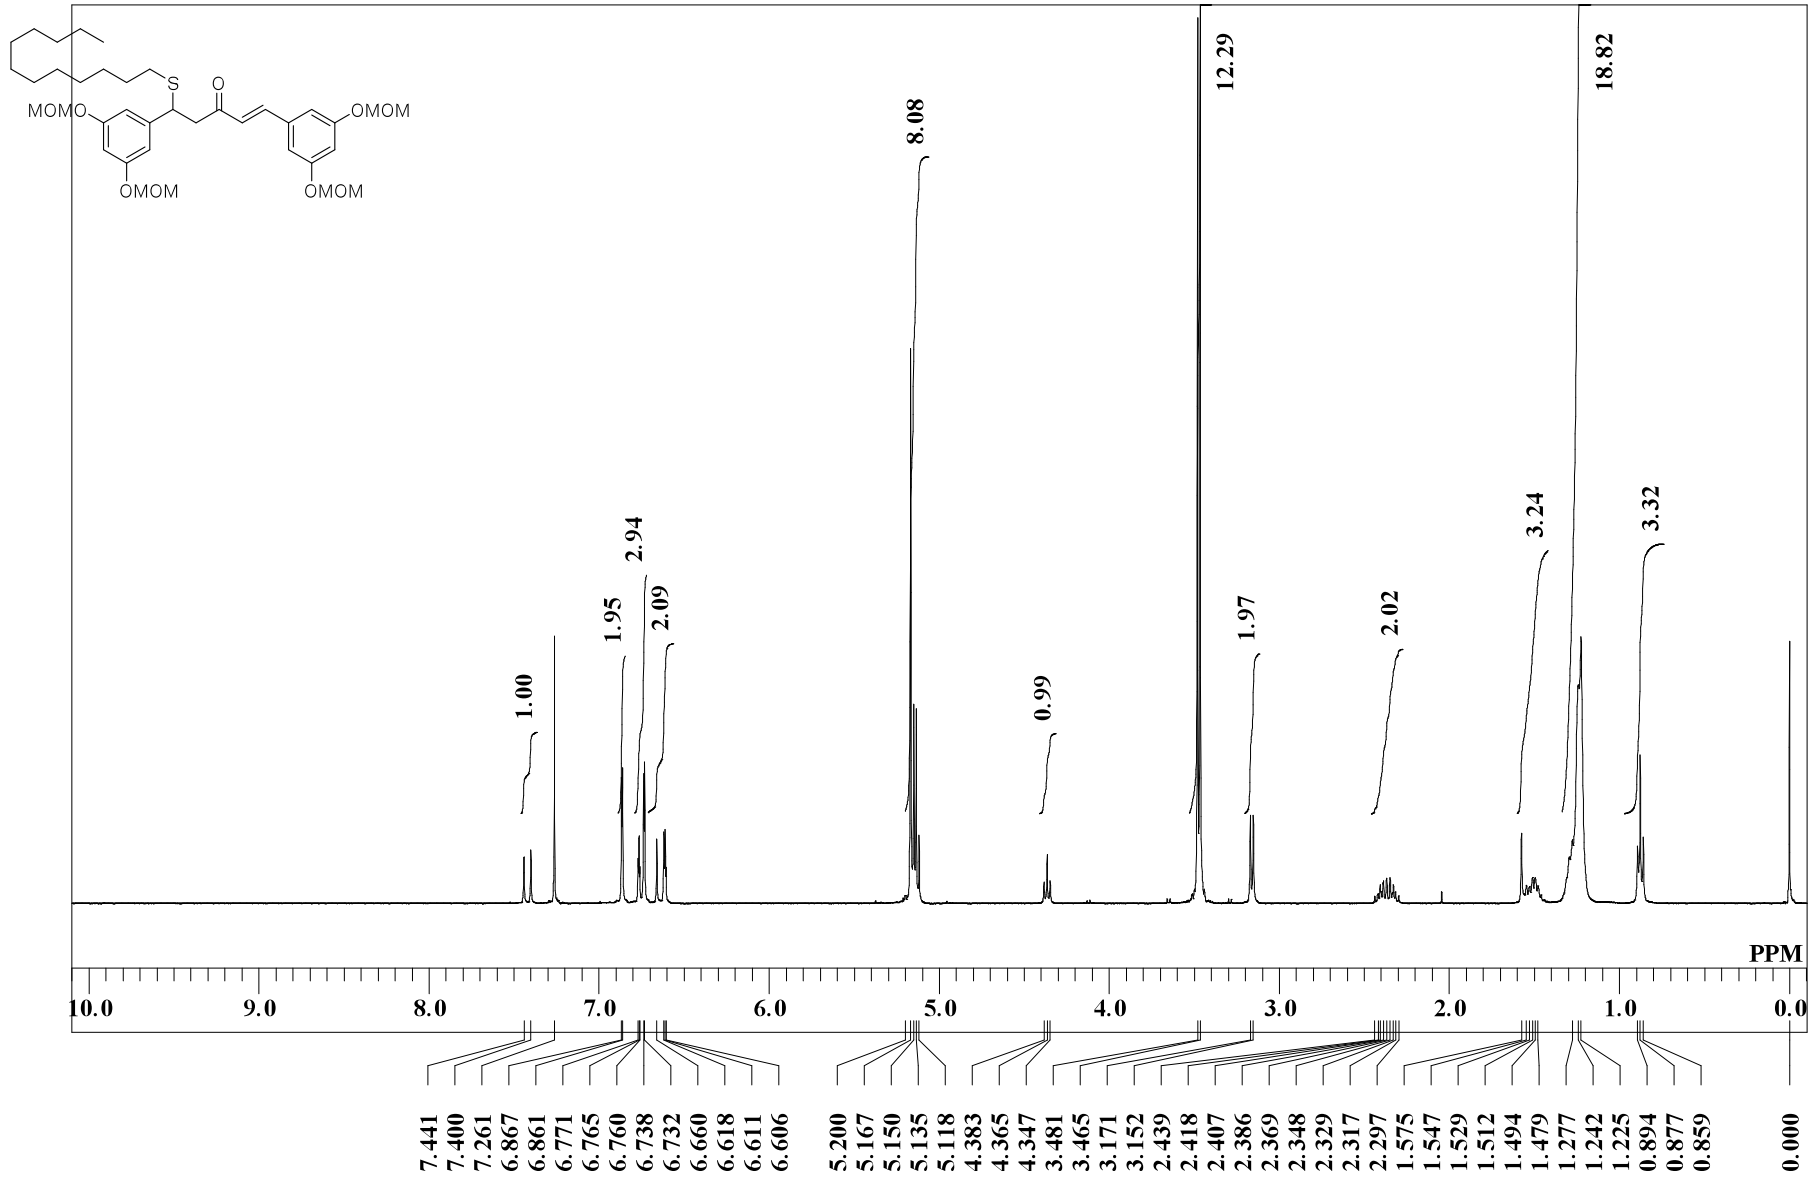

GO-Y143-13C

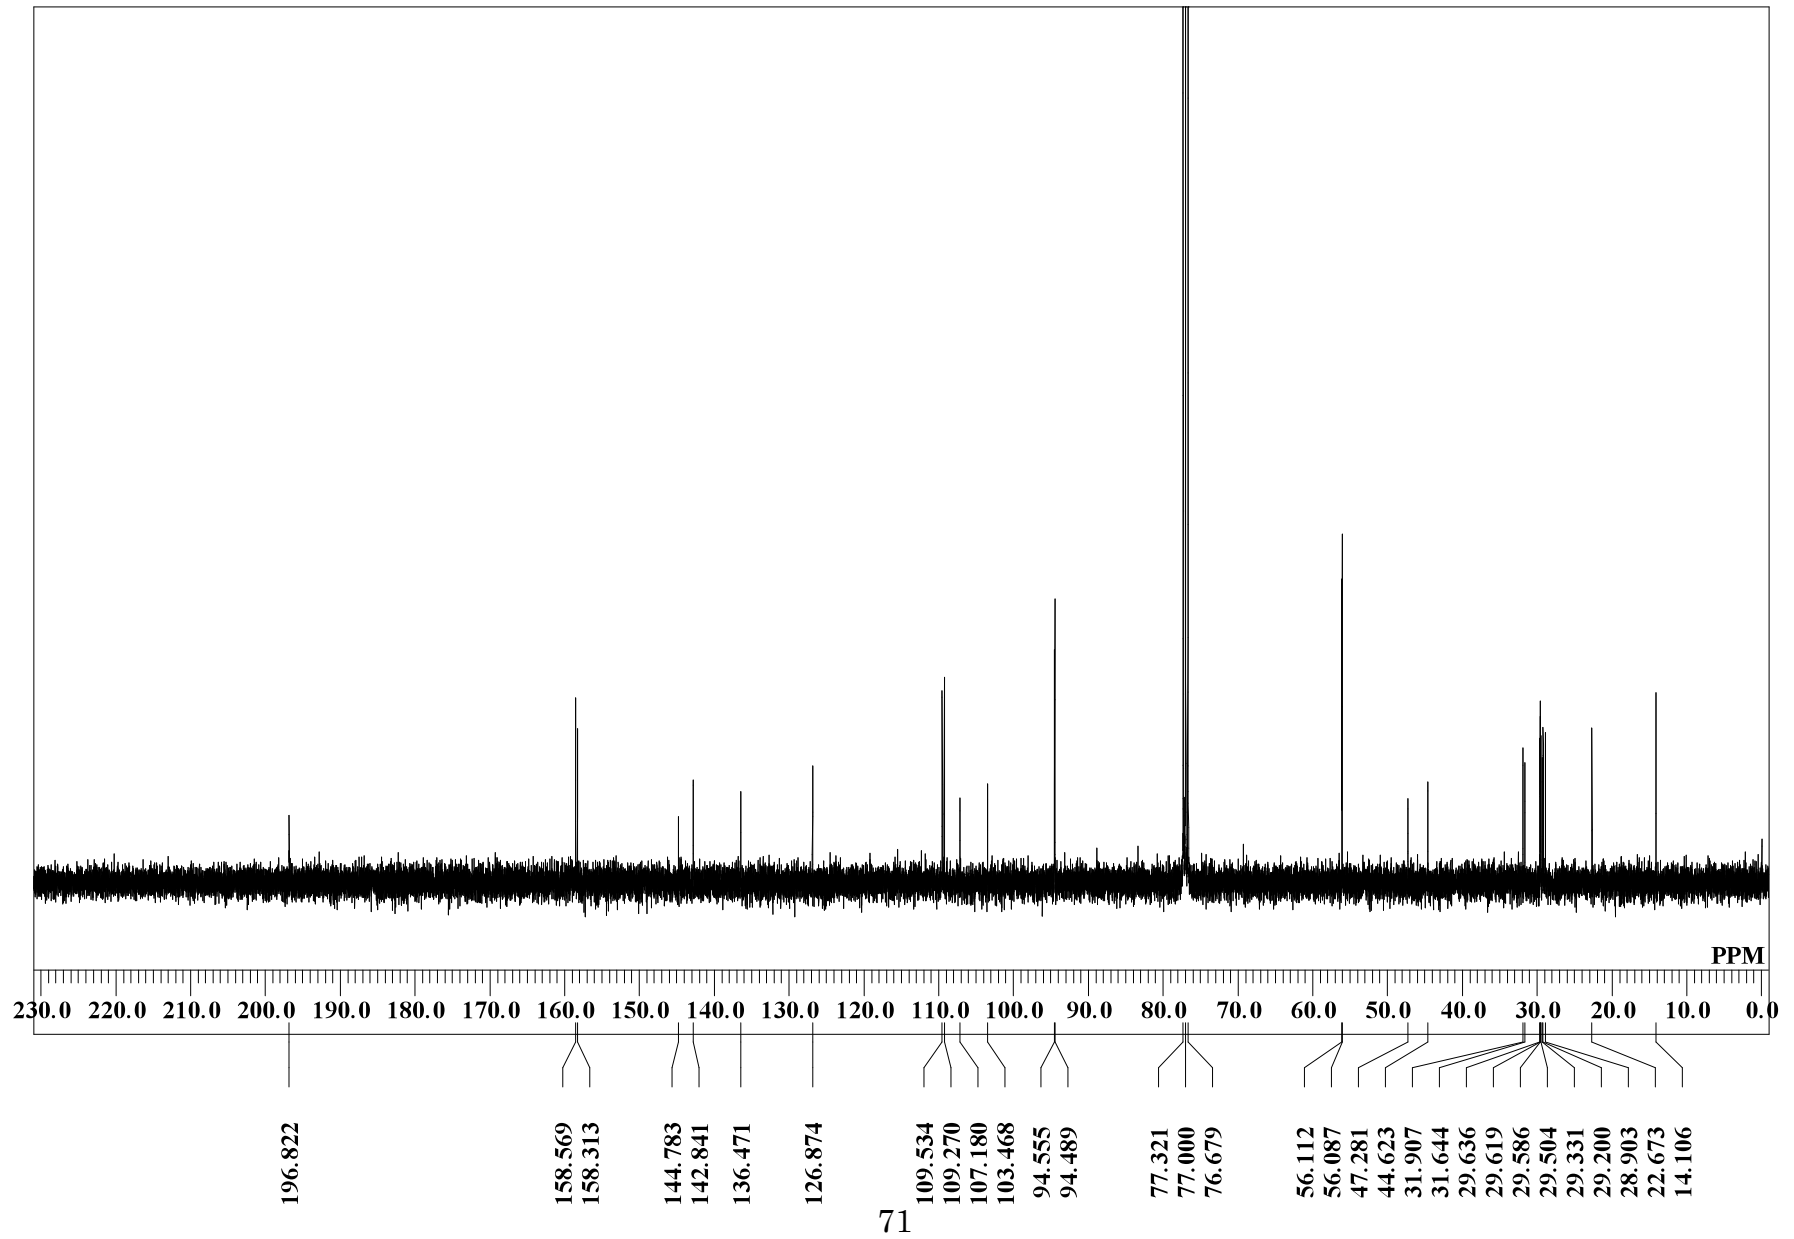

GO-Y144-1H

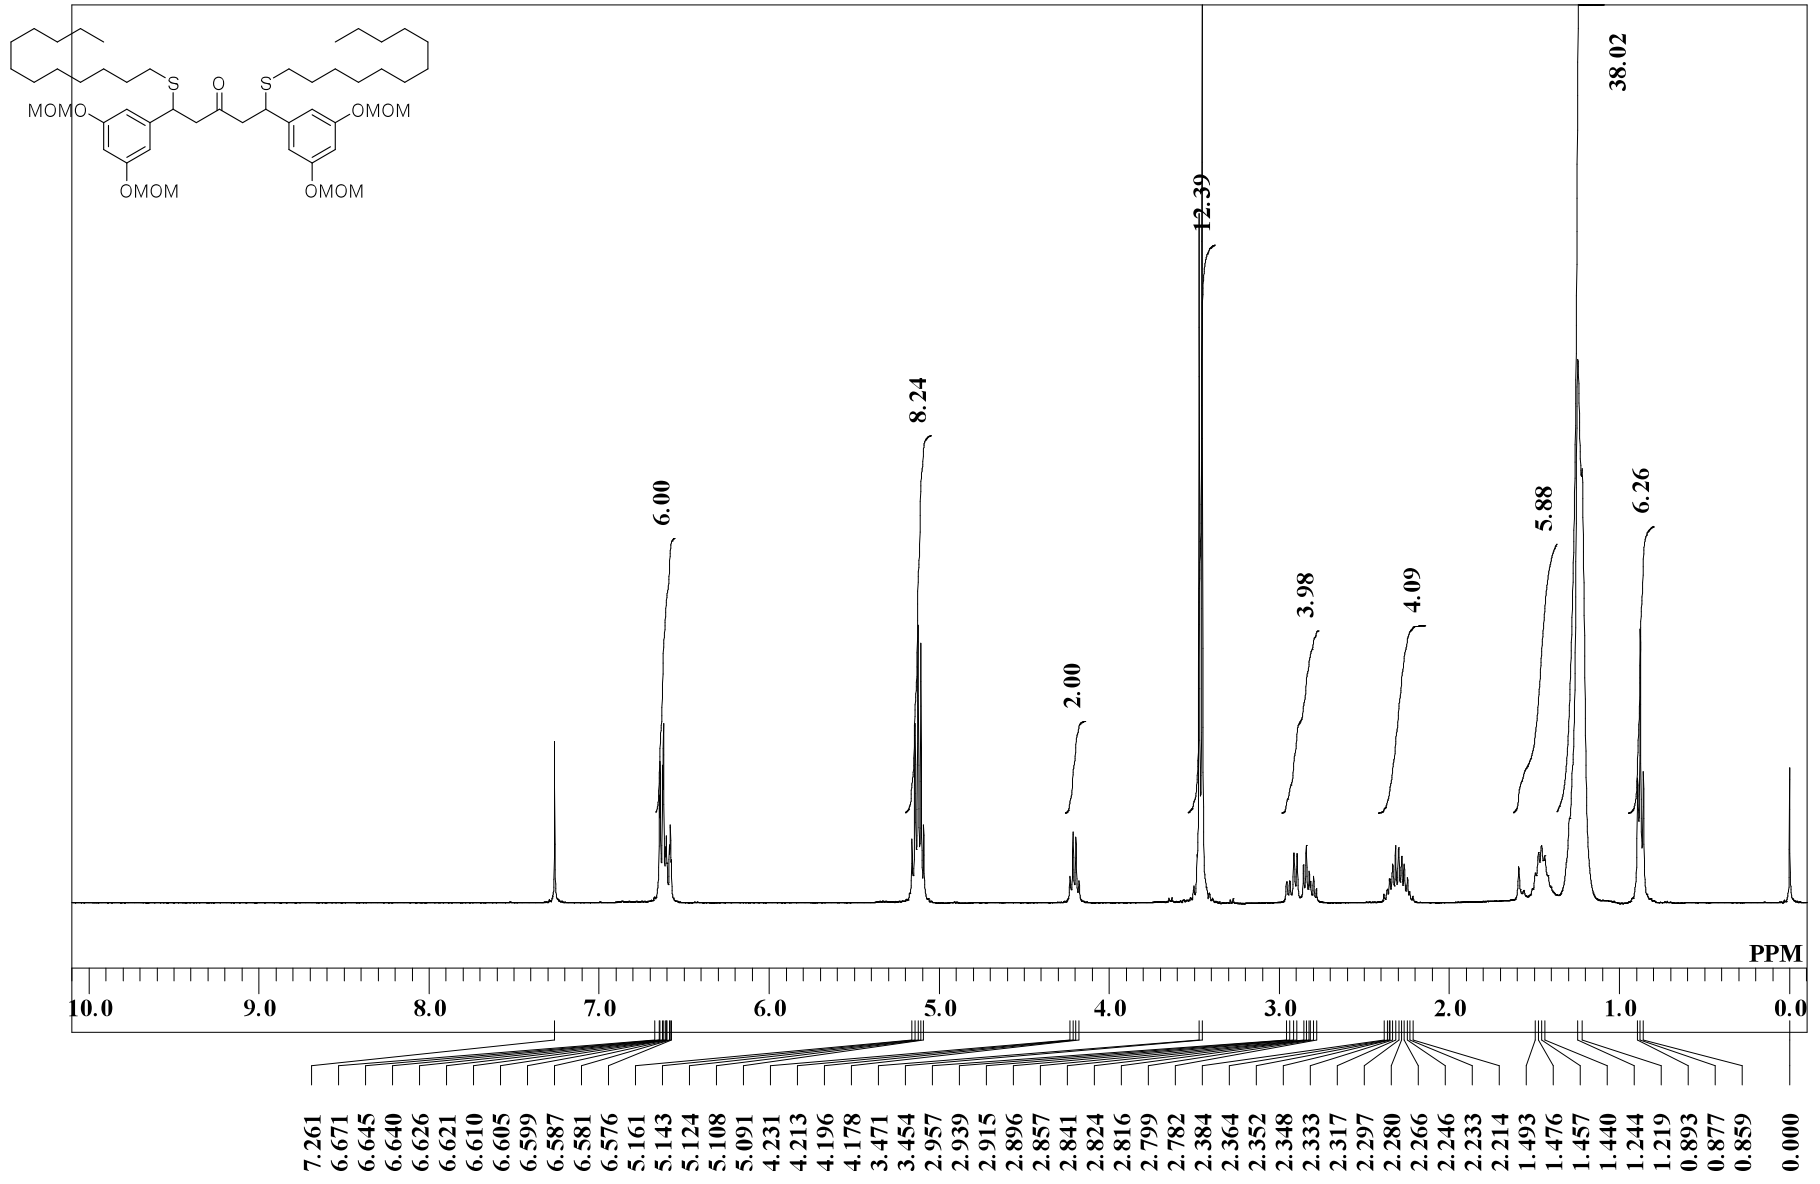



GO-Y144-13C

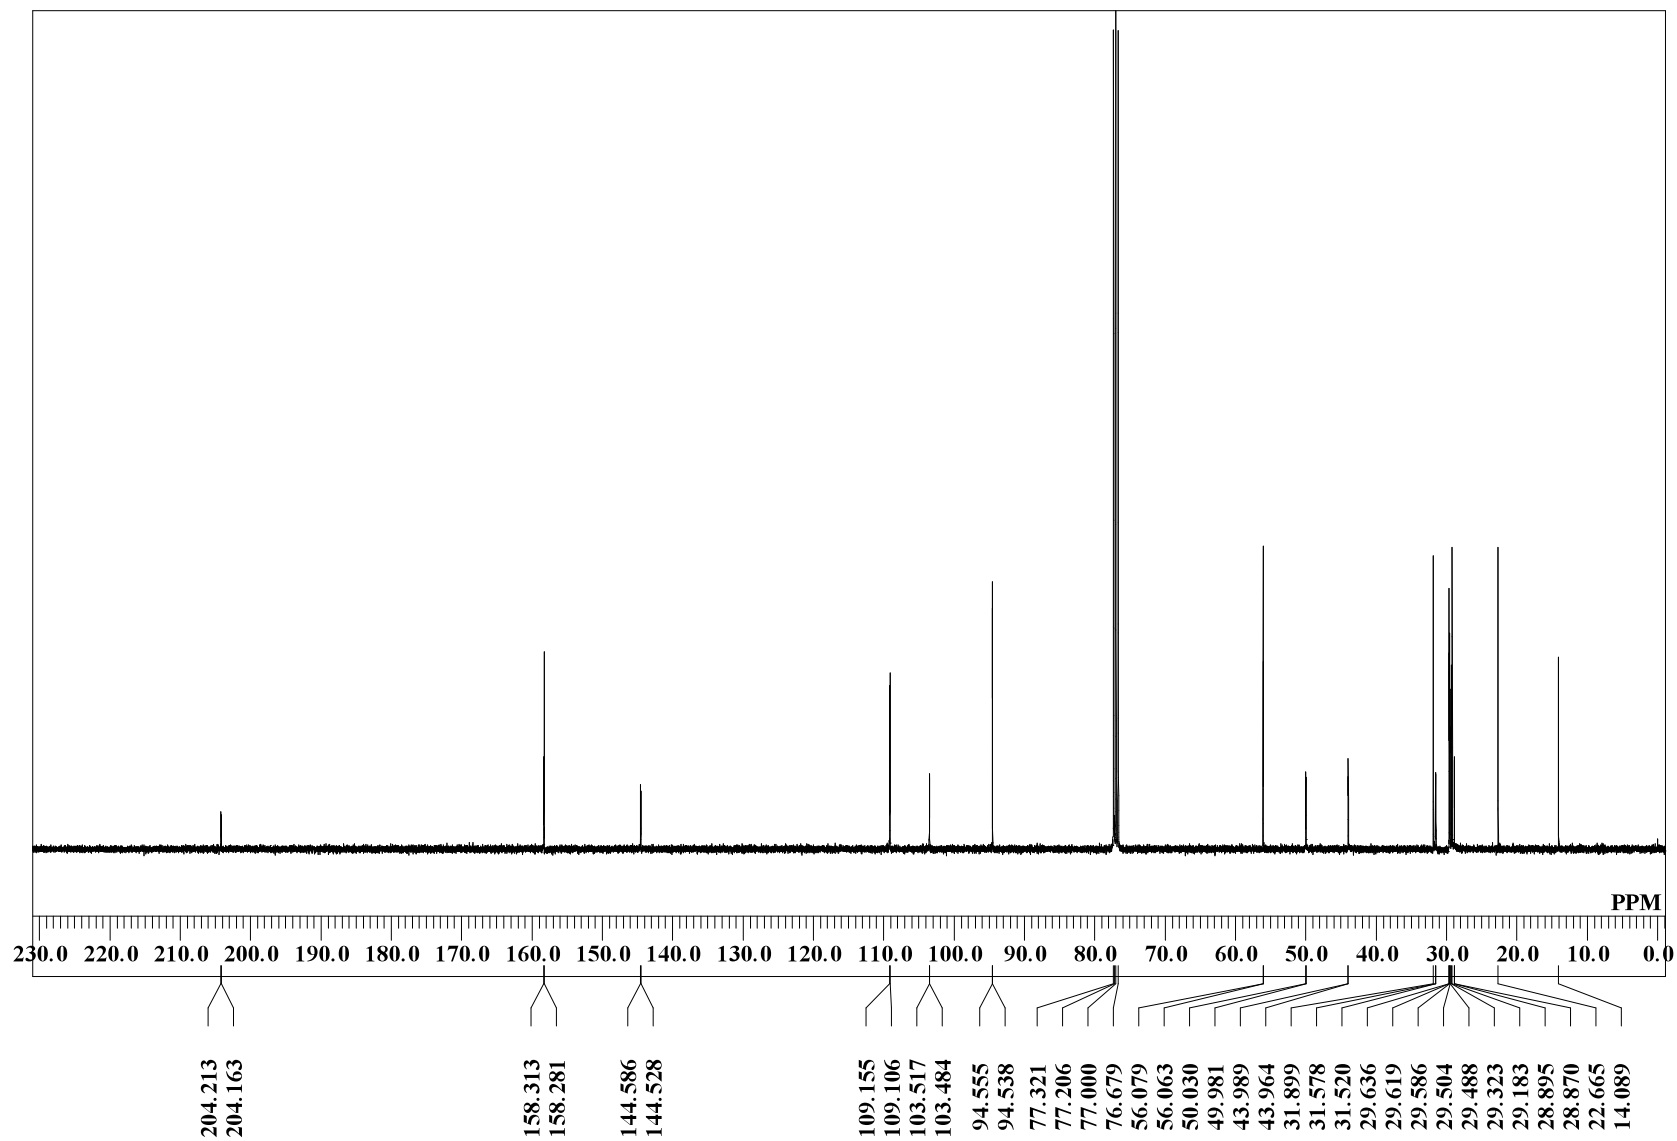

GO-Y179-1H

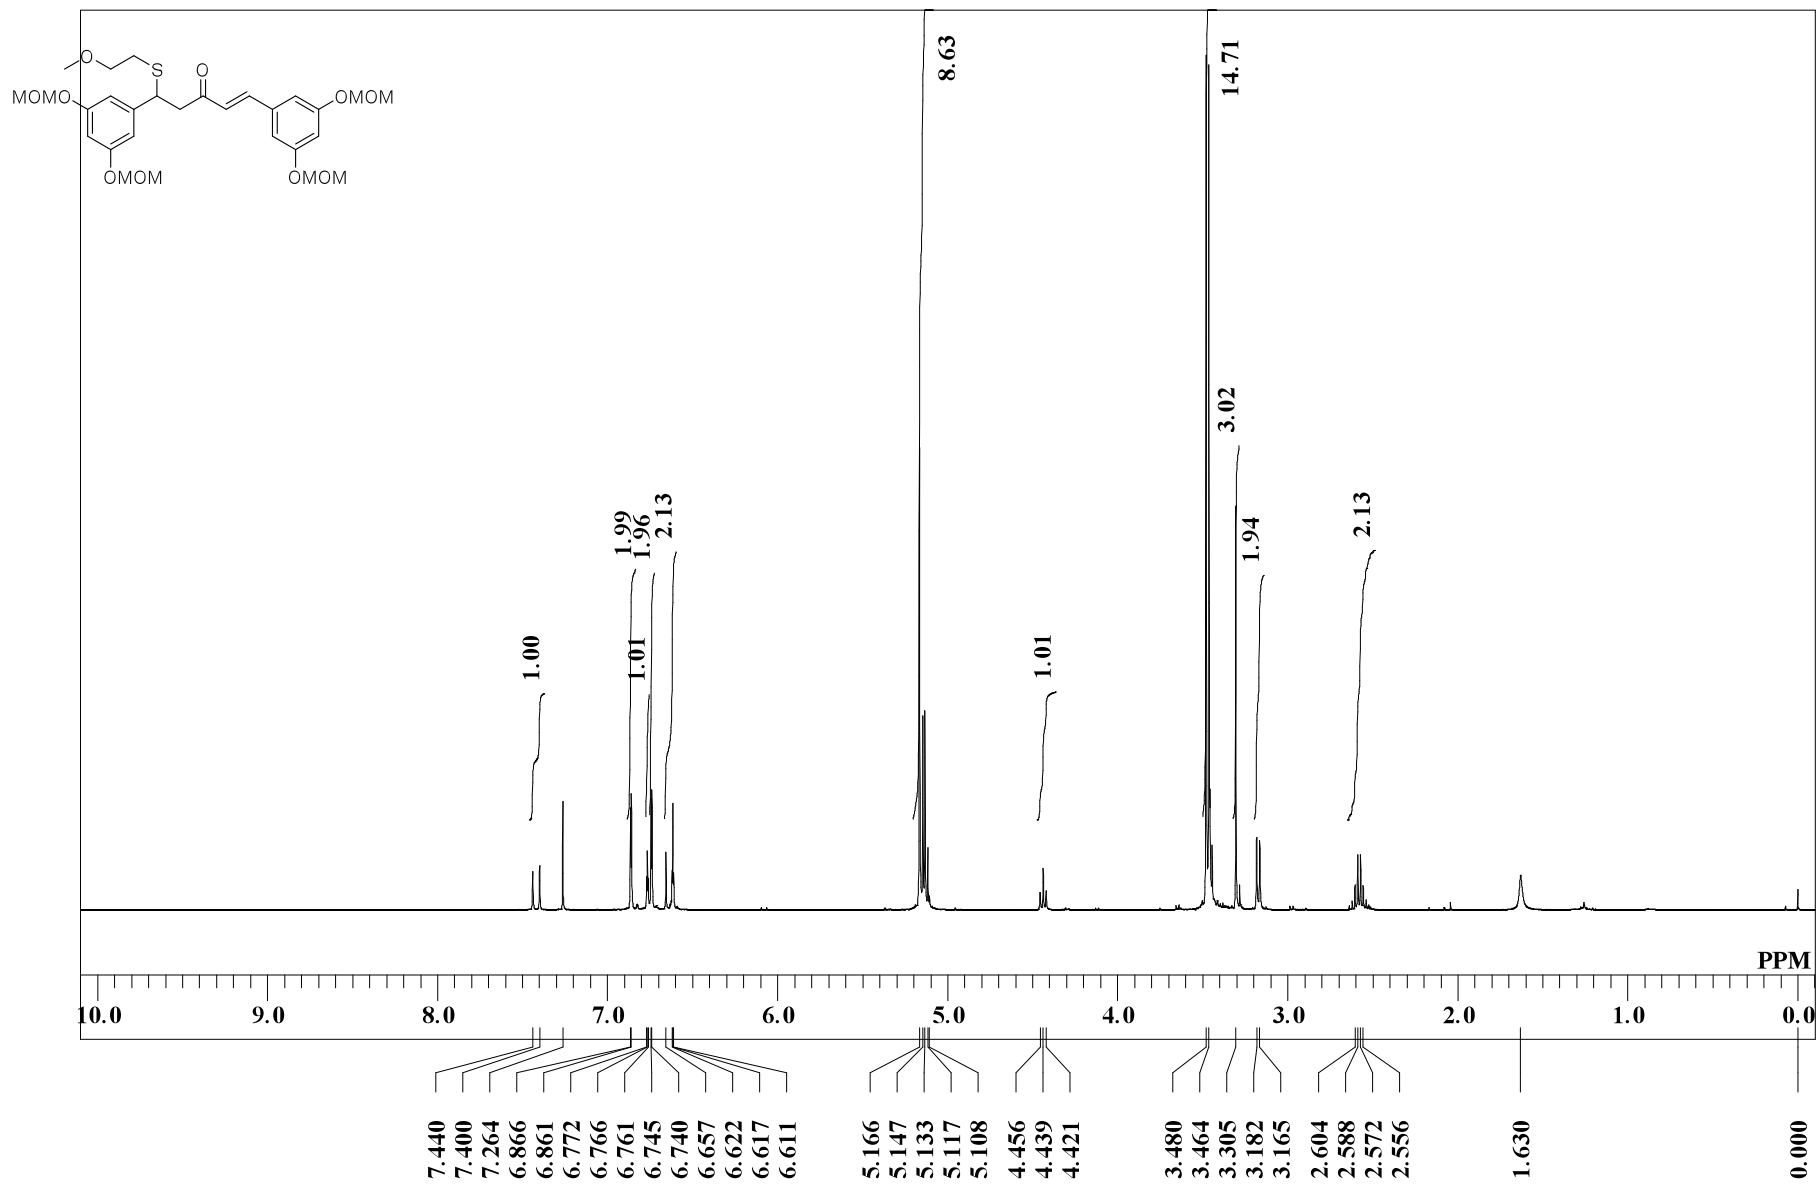

GO-Y179-13C

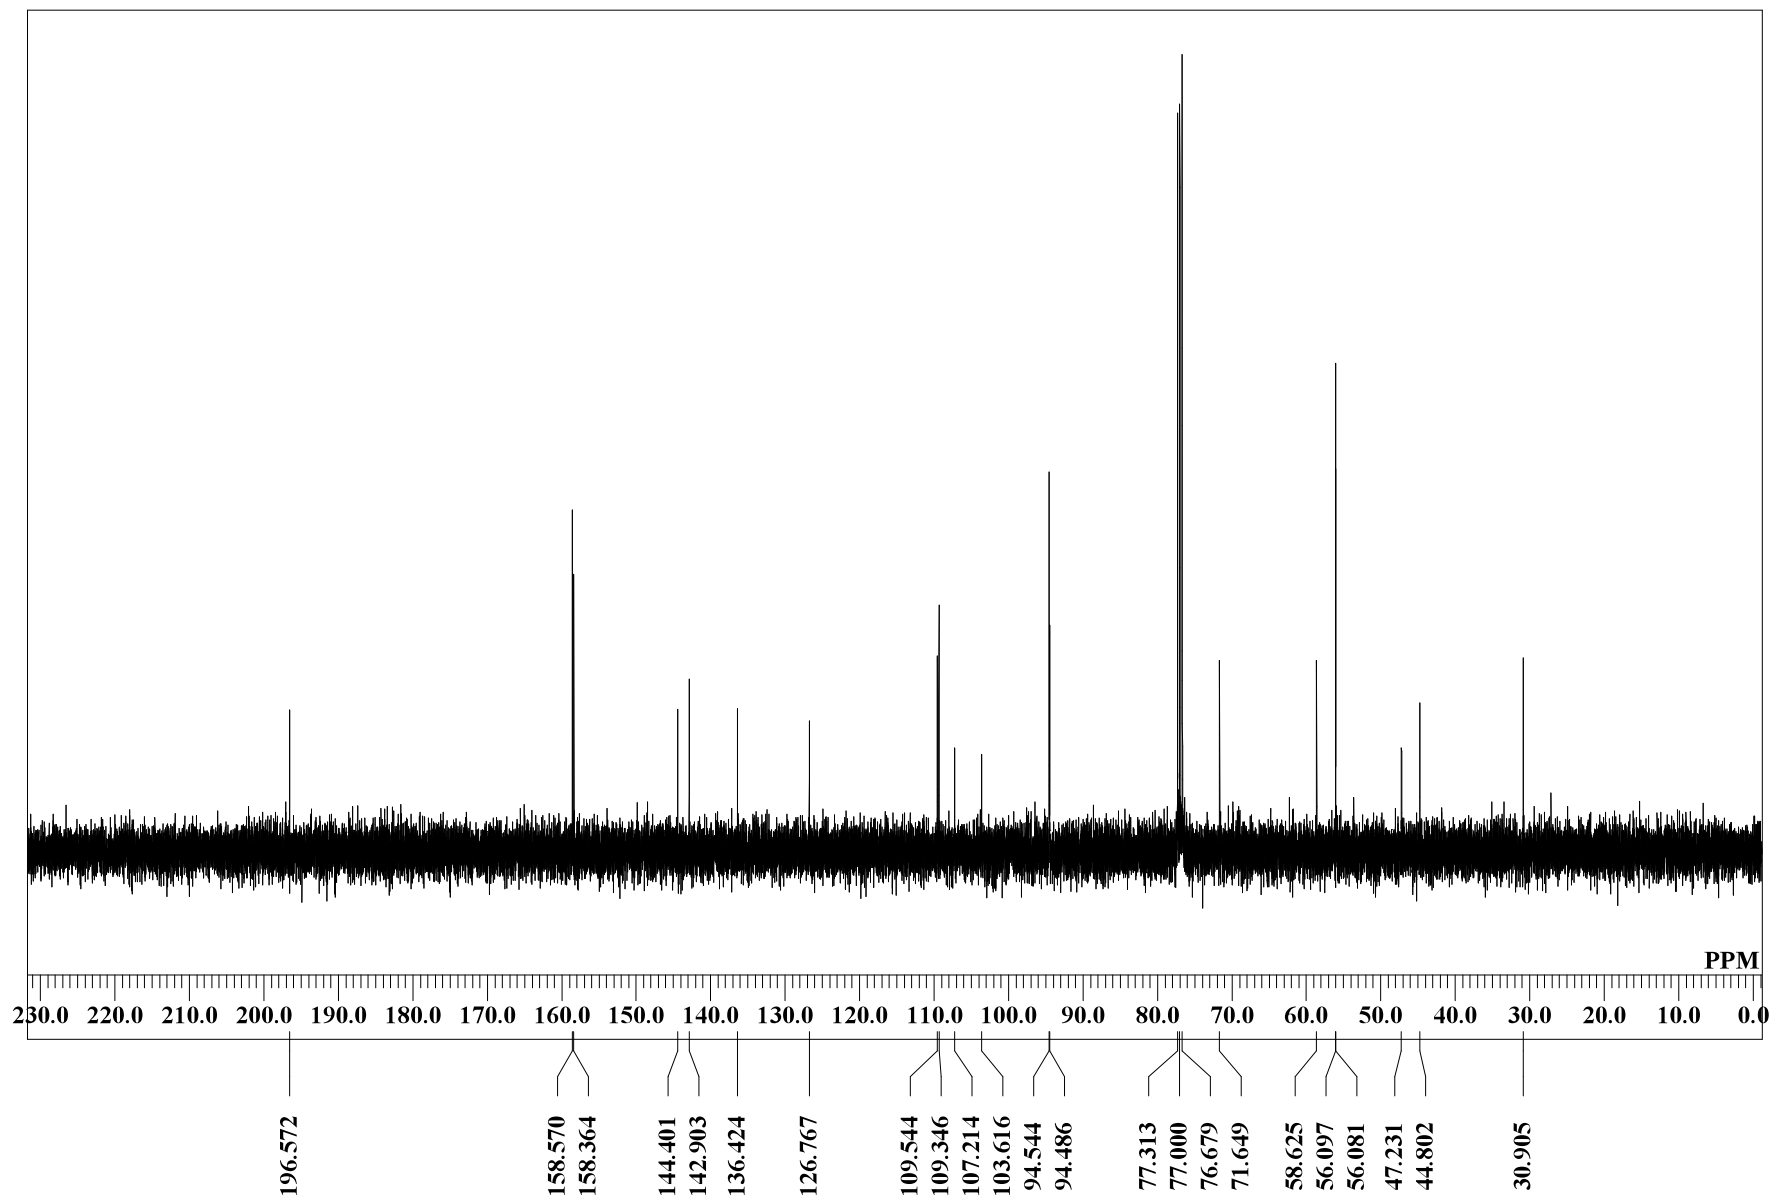

GO-Y180-1H

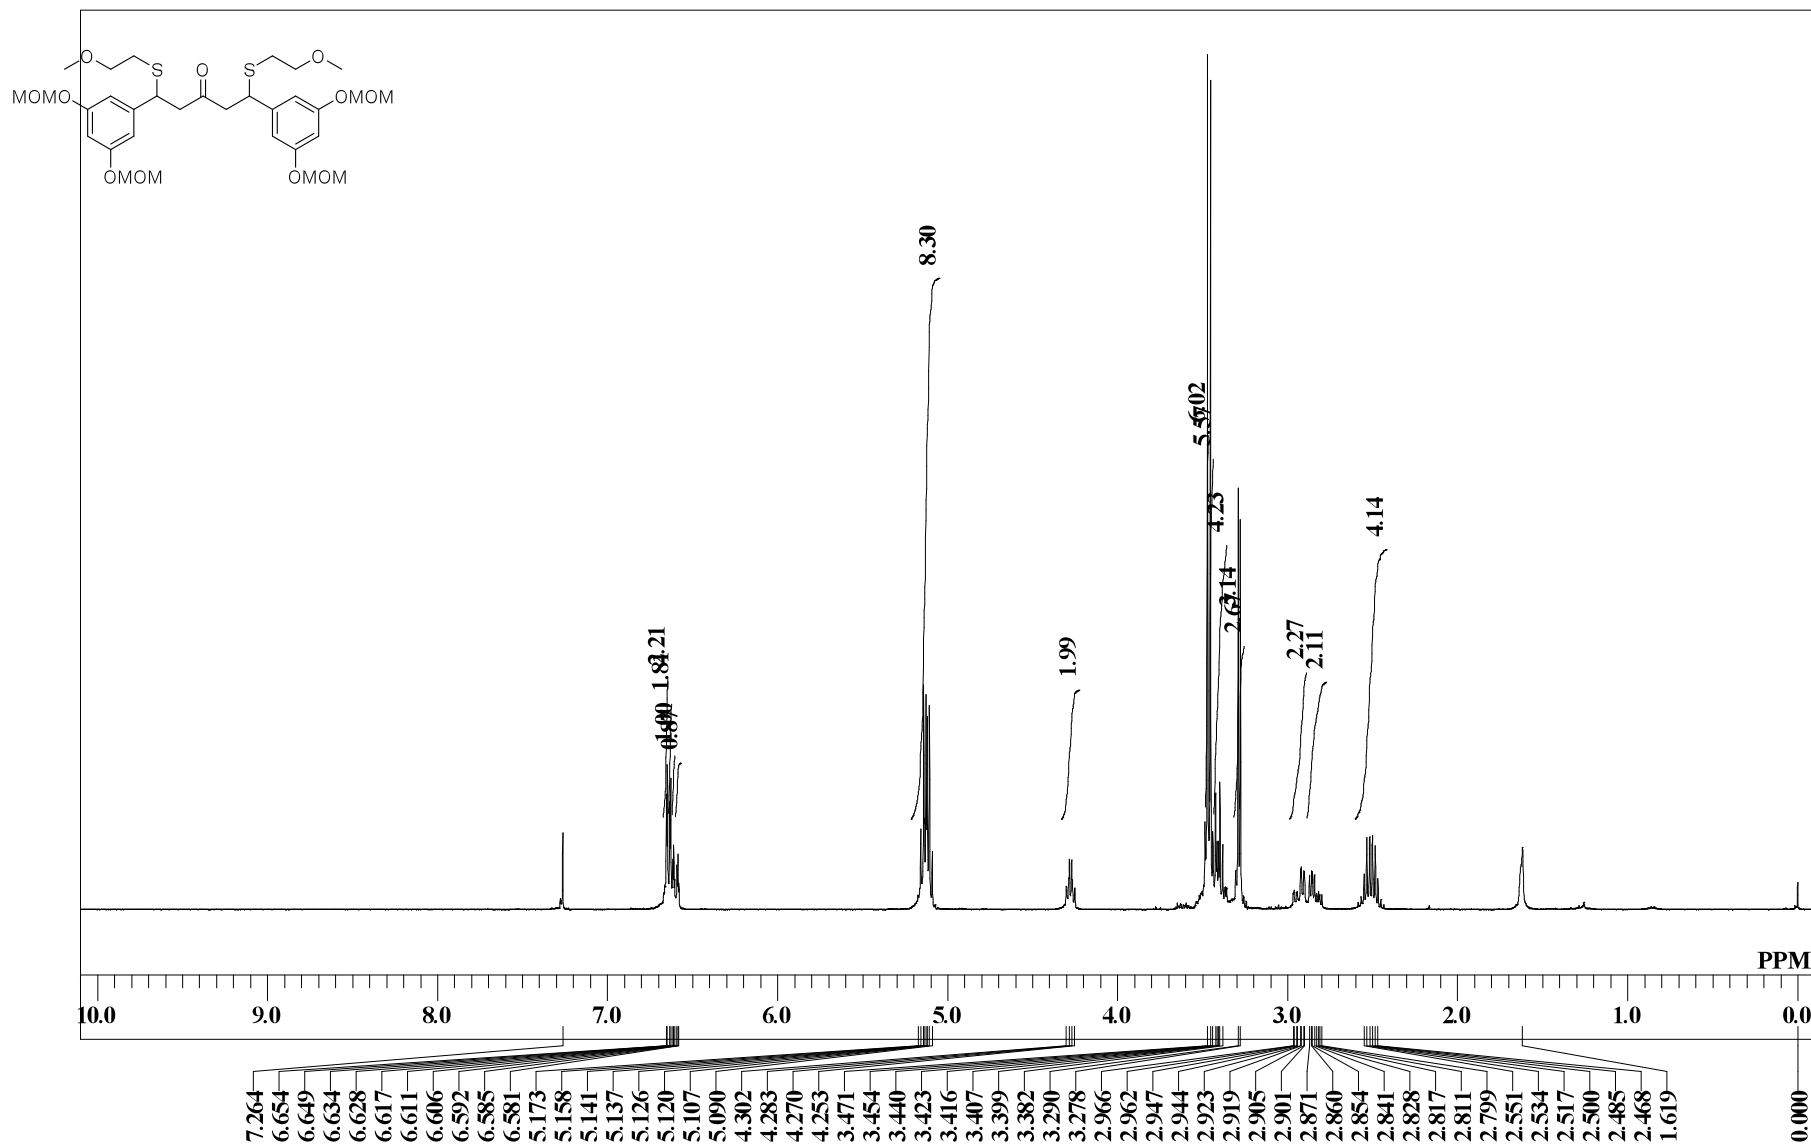

GO-Y180-13C

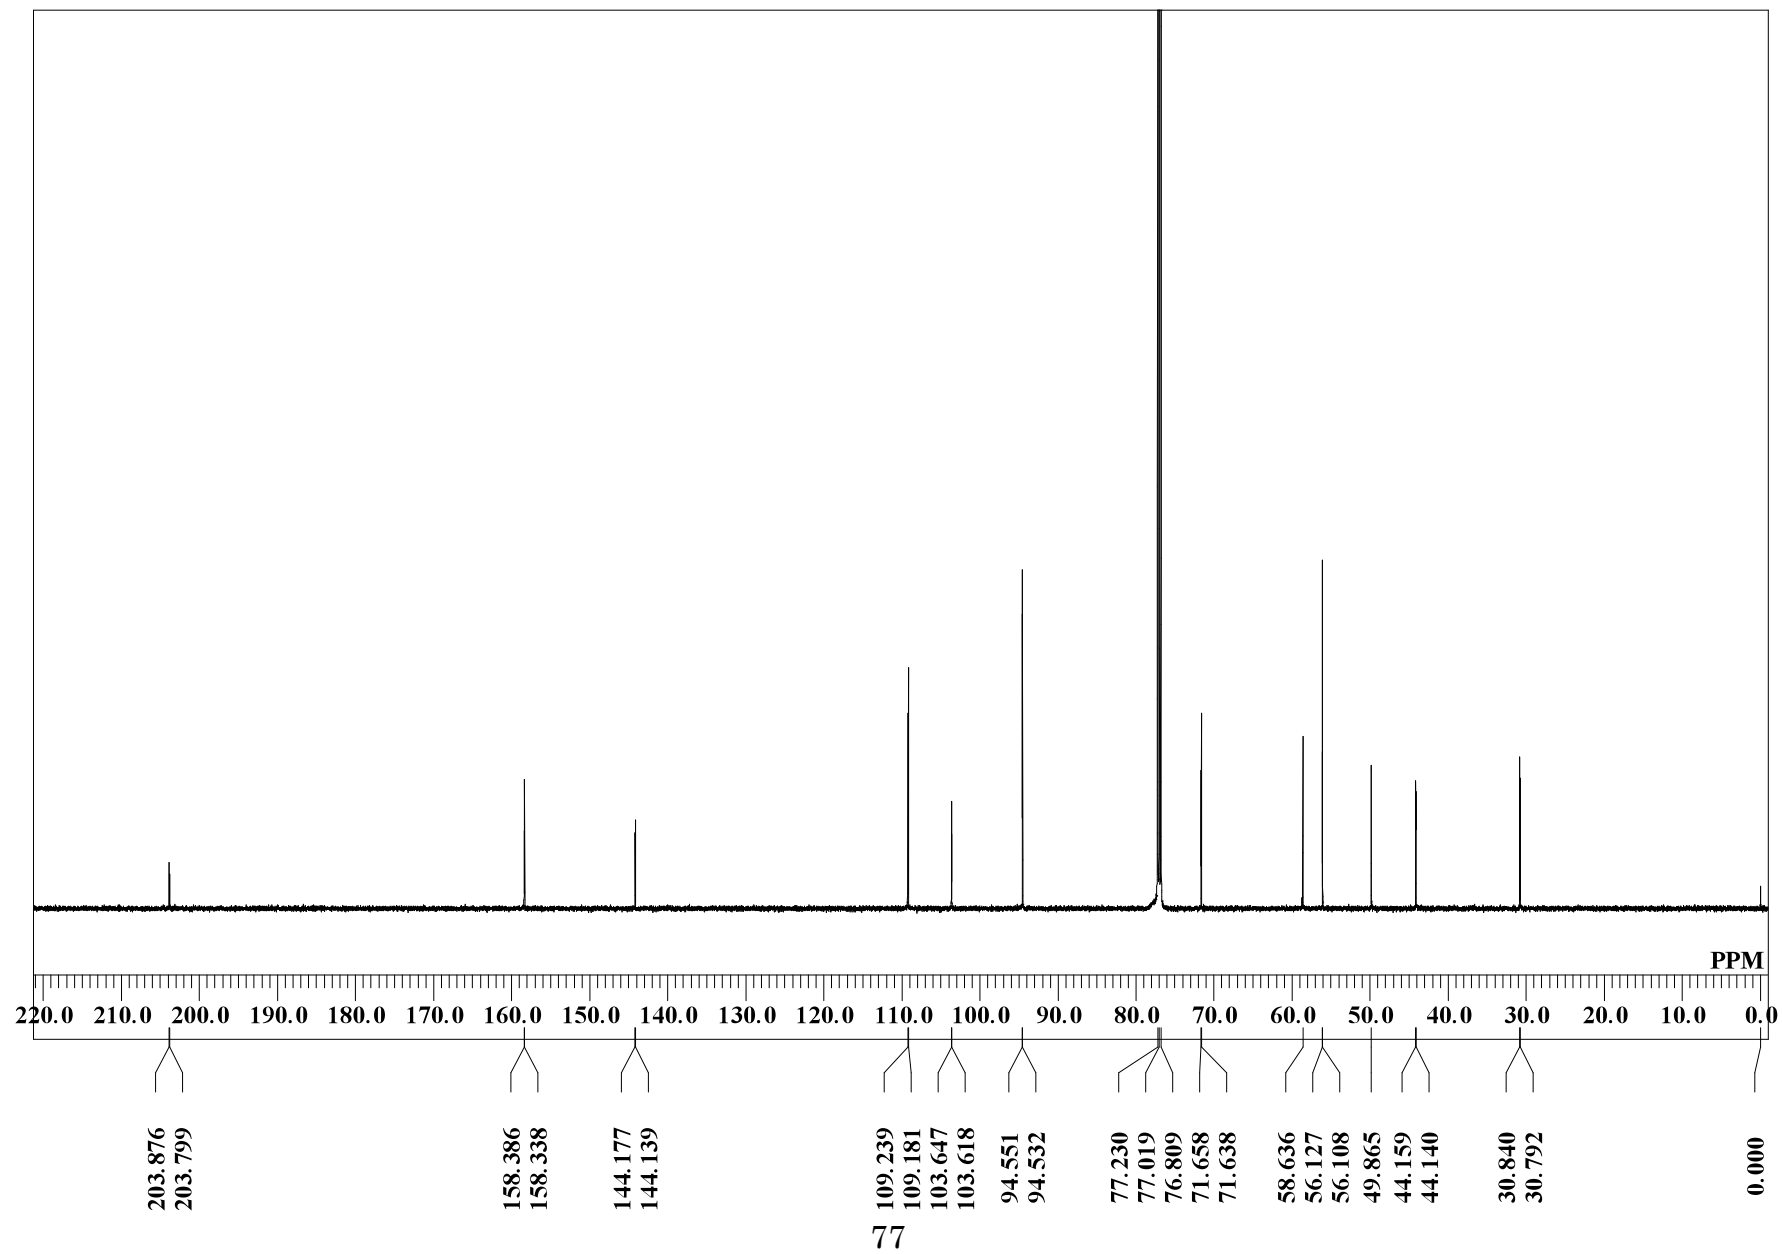

GO-Y184-1H

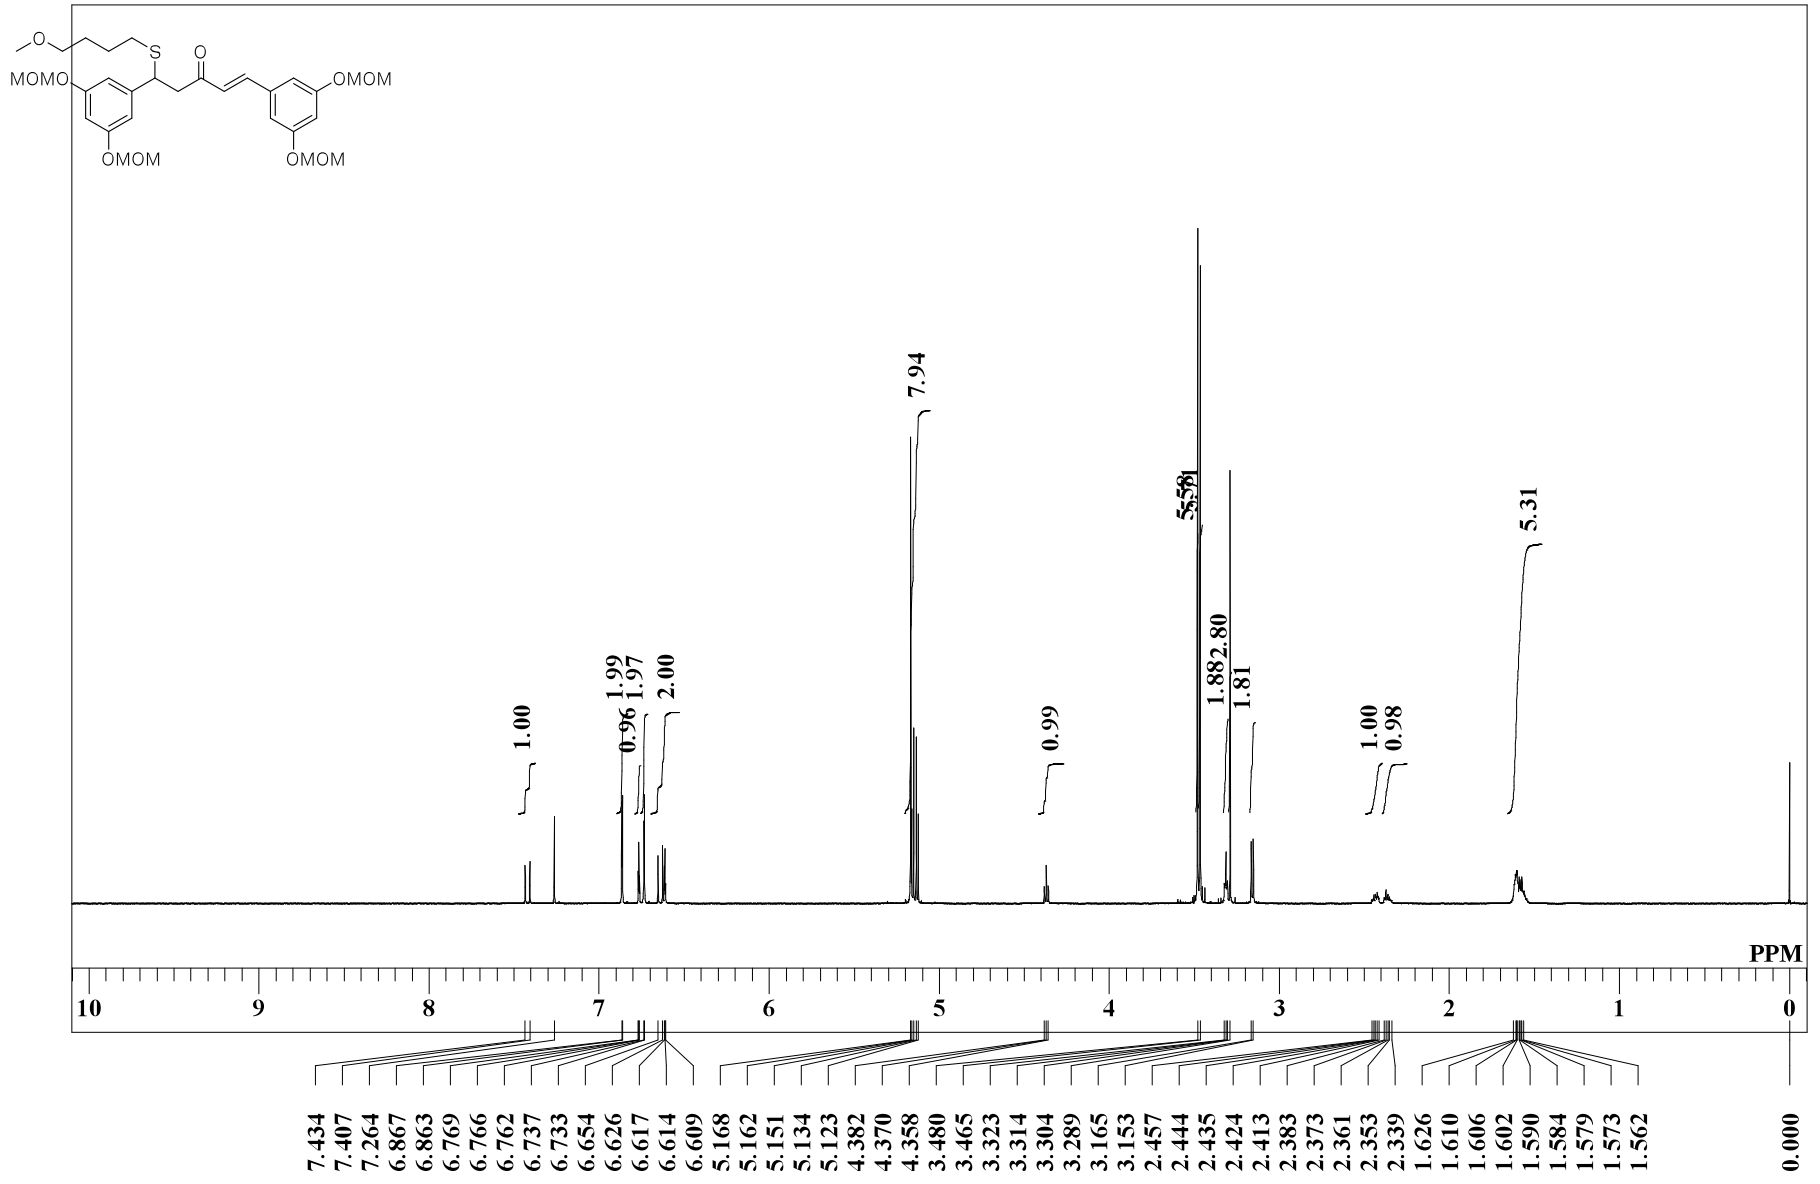

GO-Y184-13C

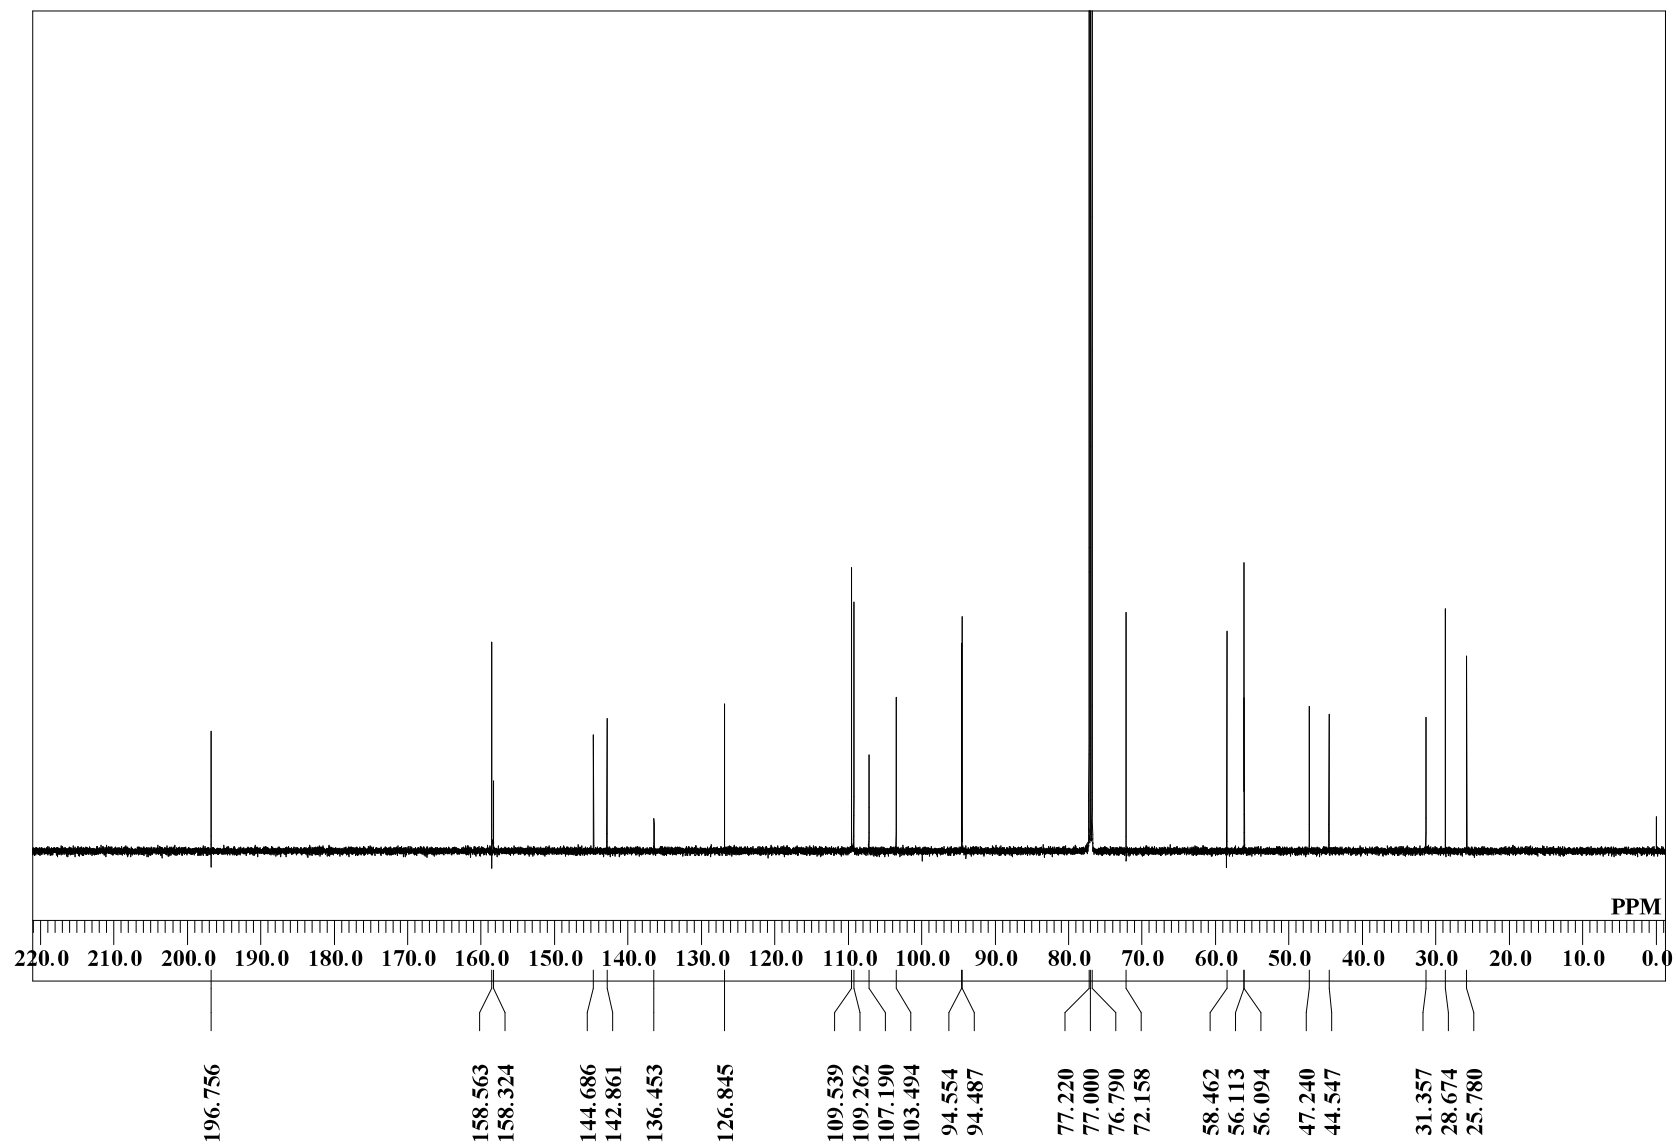

GO-Y185-1H

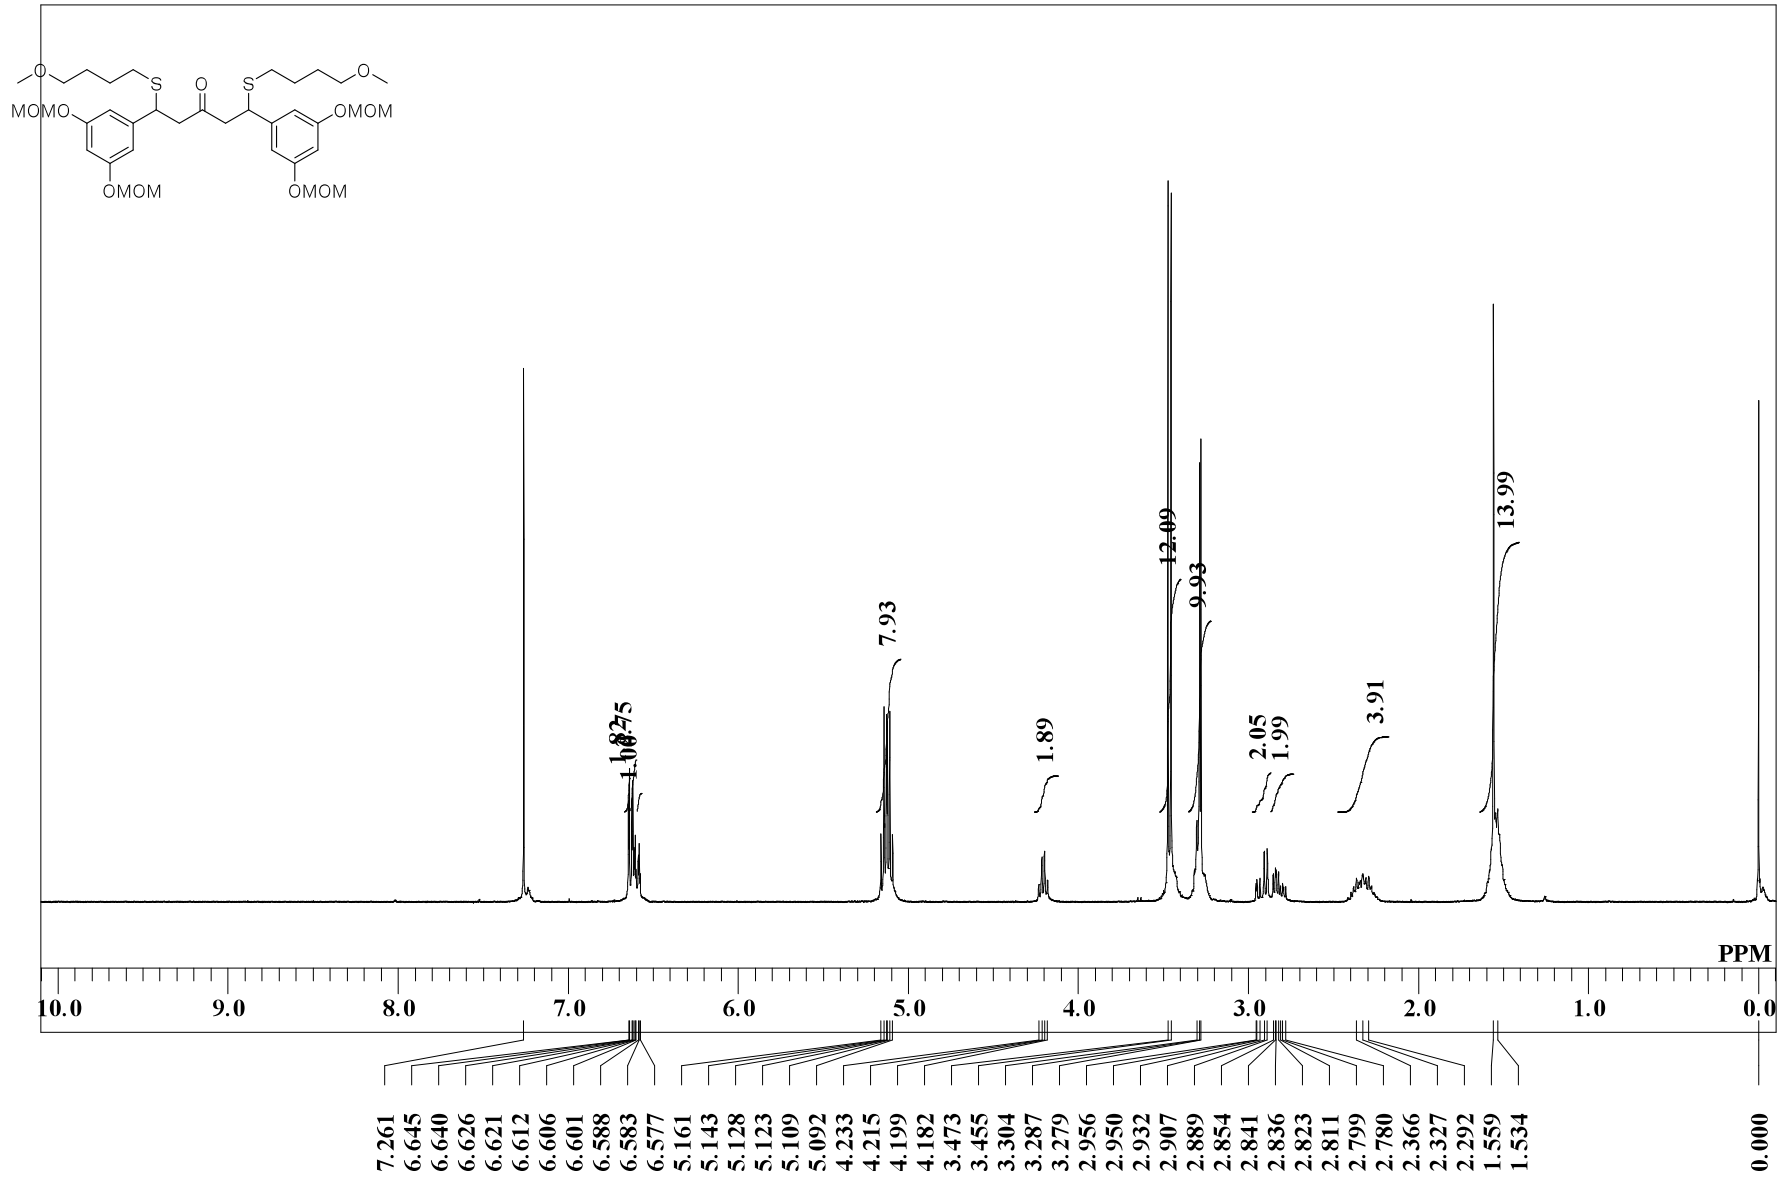



GO-Y185-13C

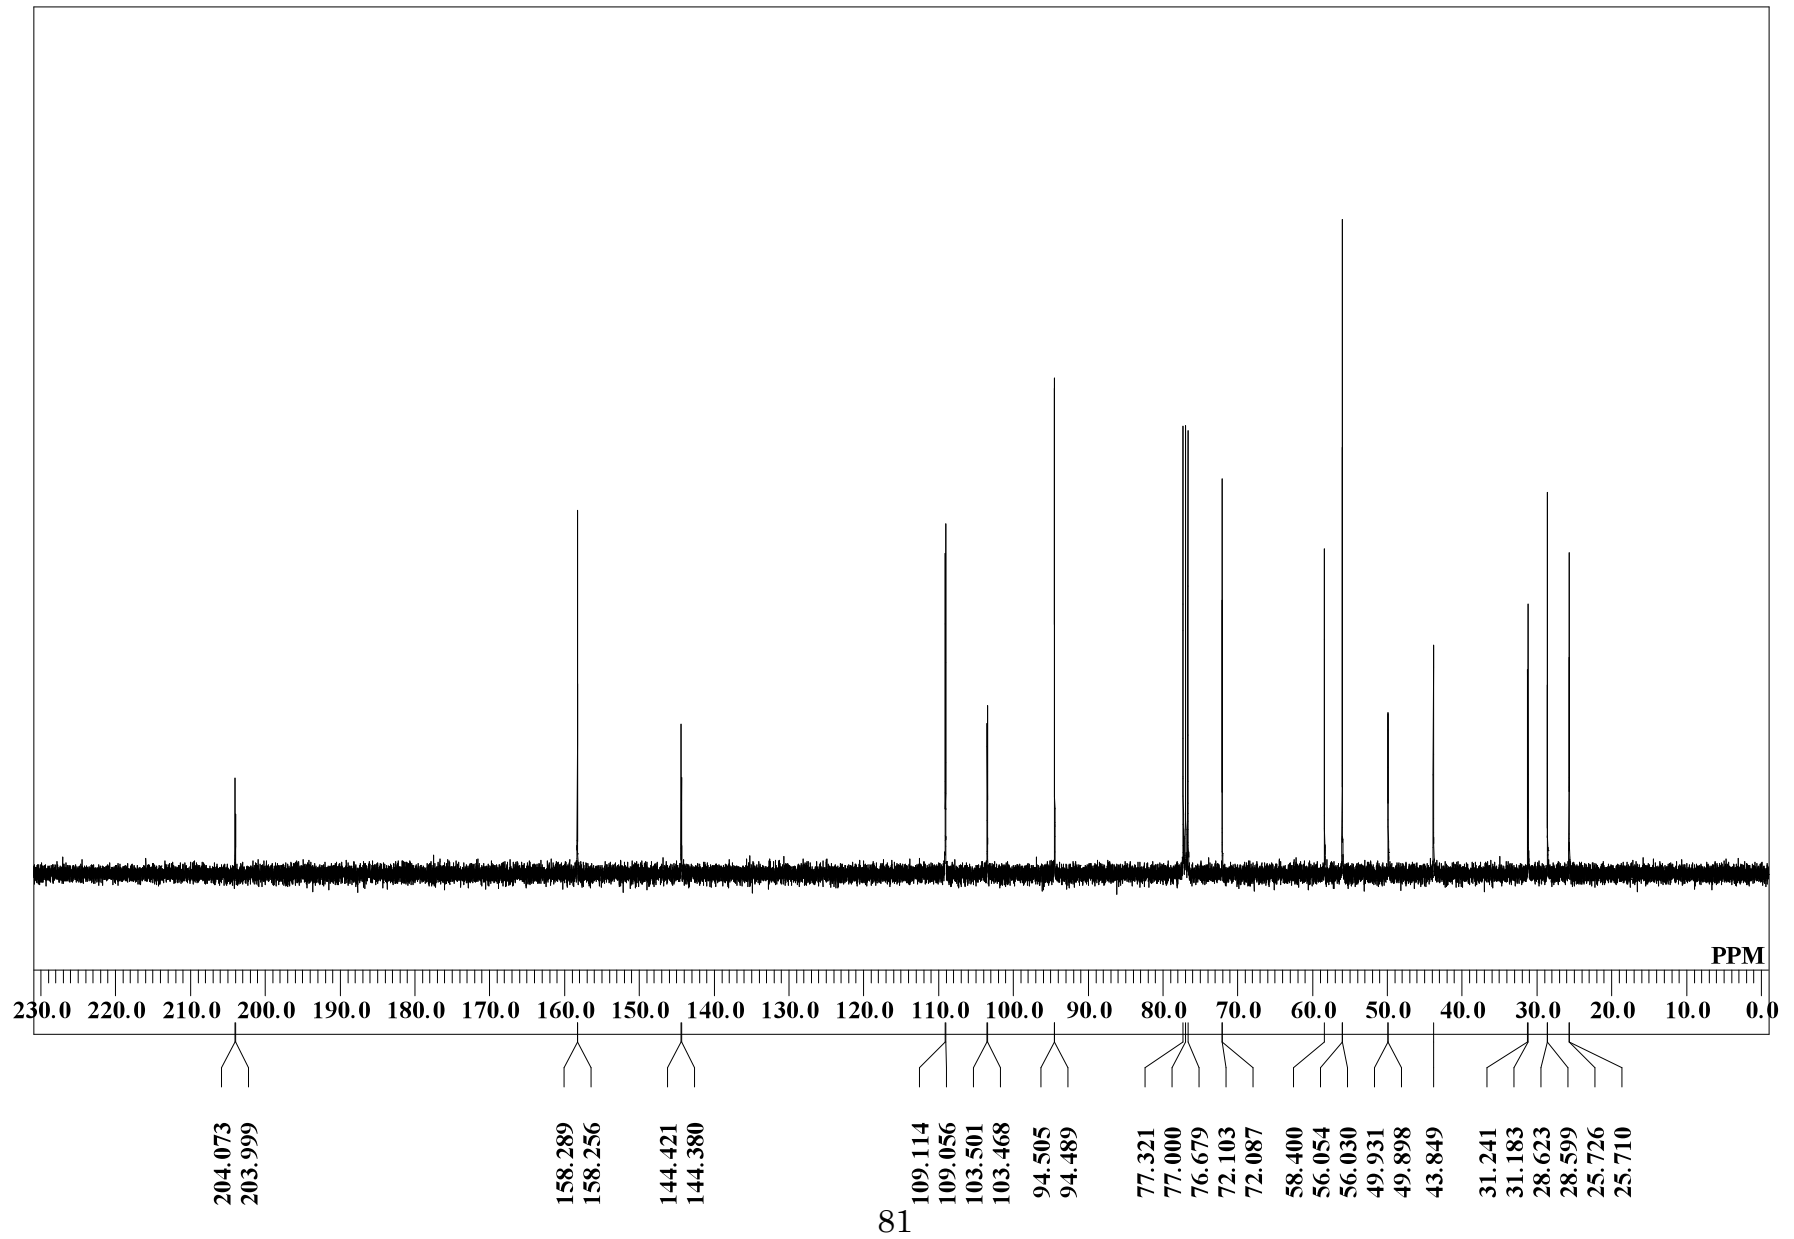

GO-Y186-1H

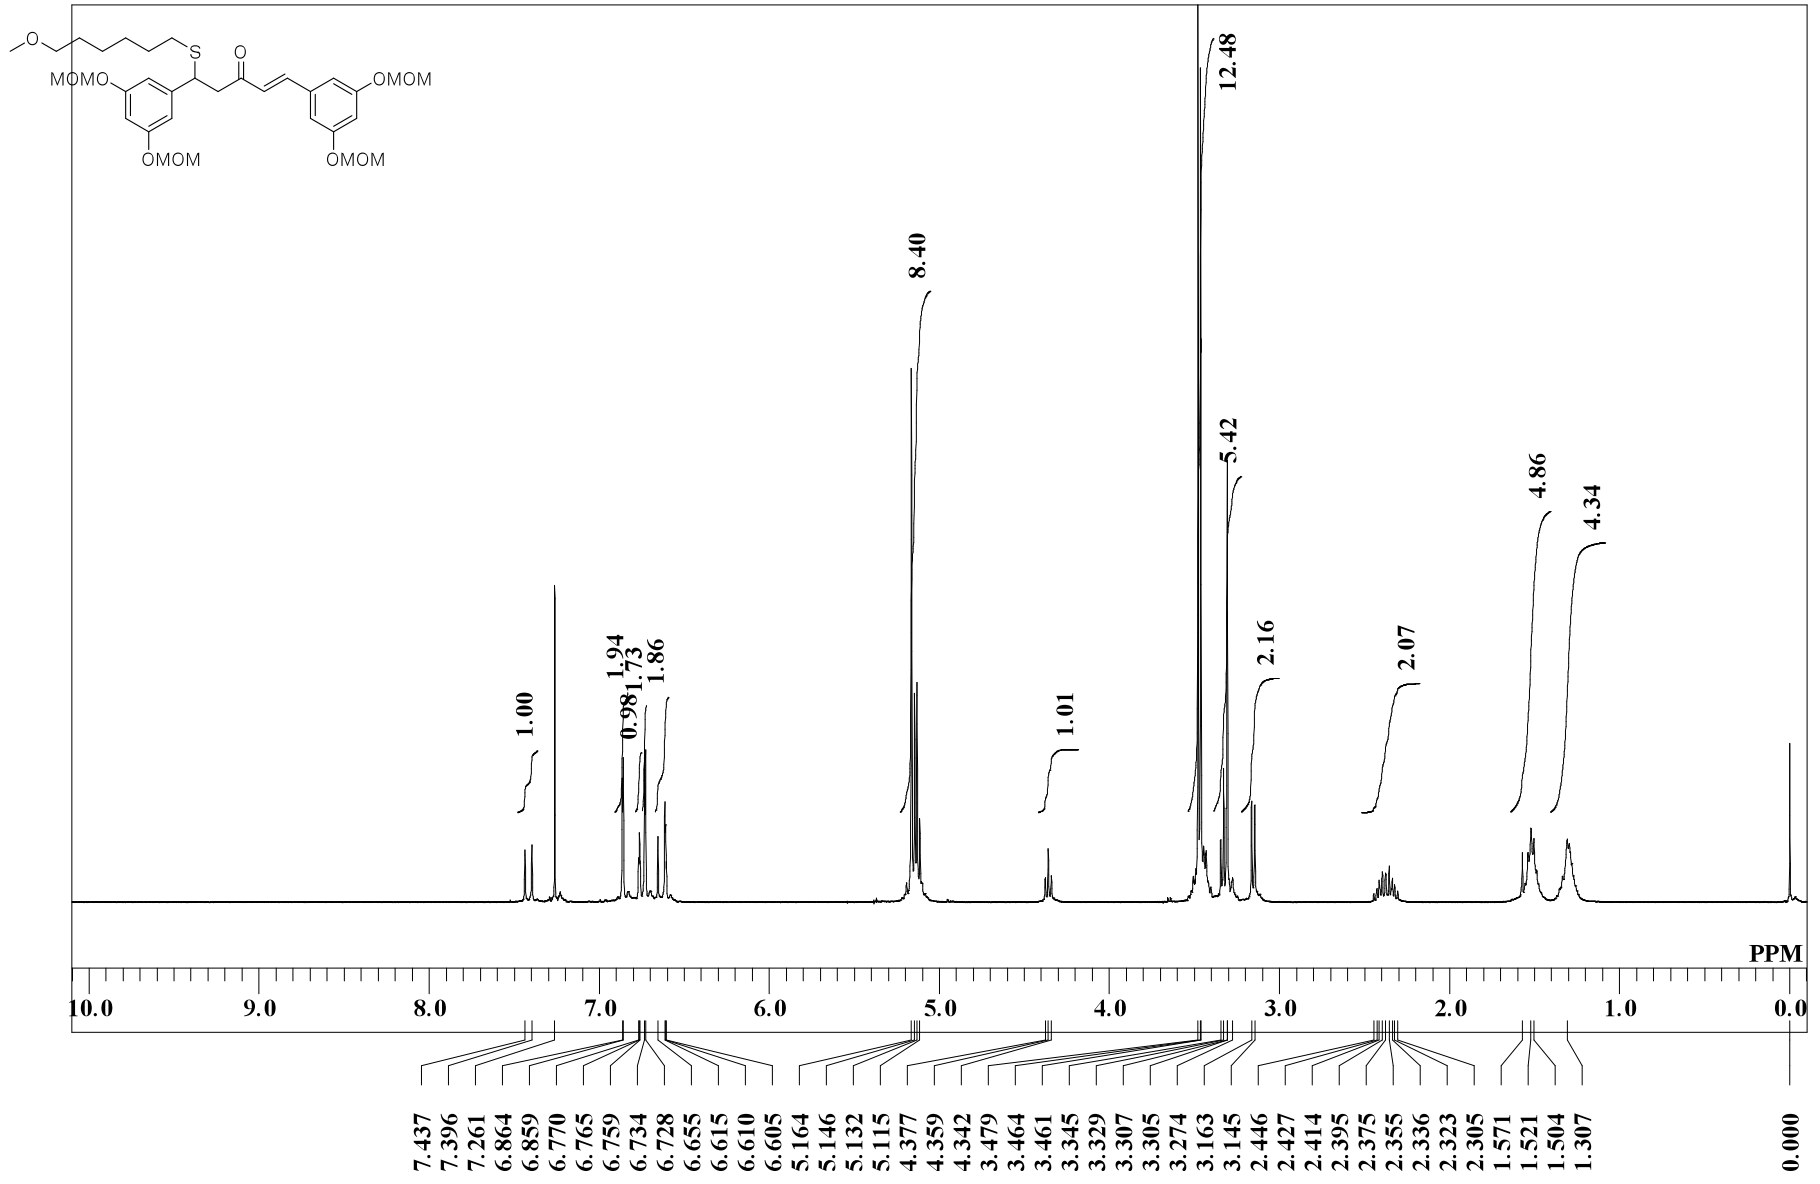

GO-Y186-13C

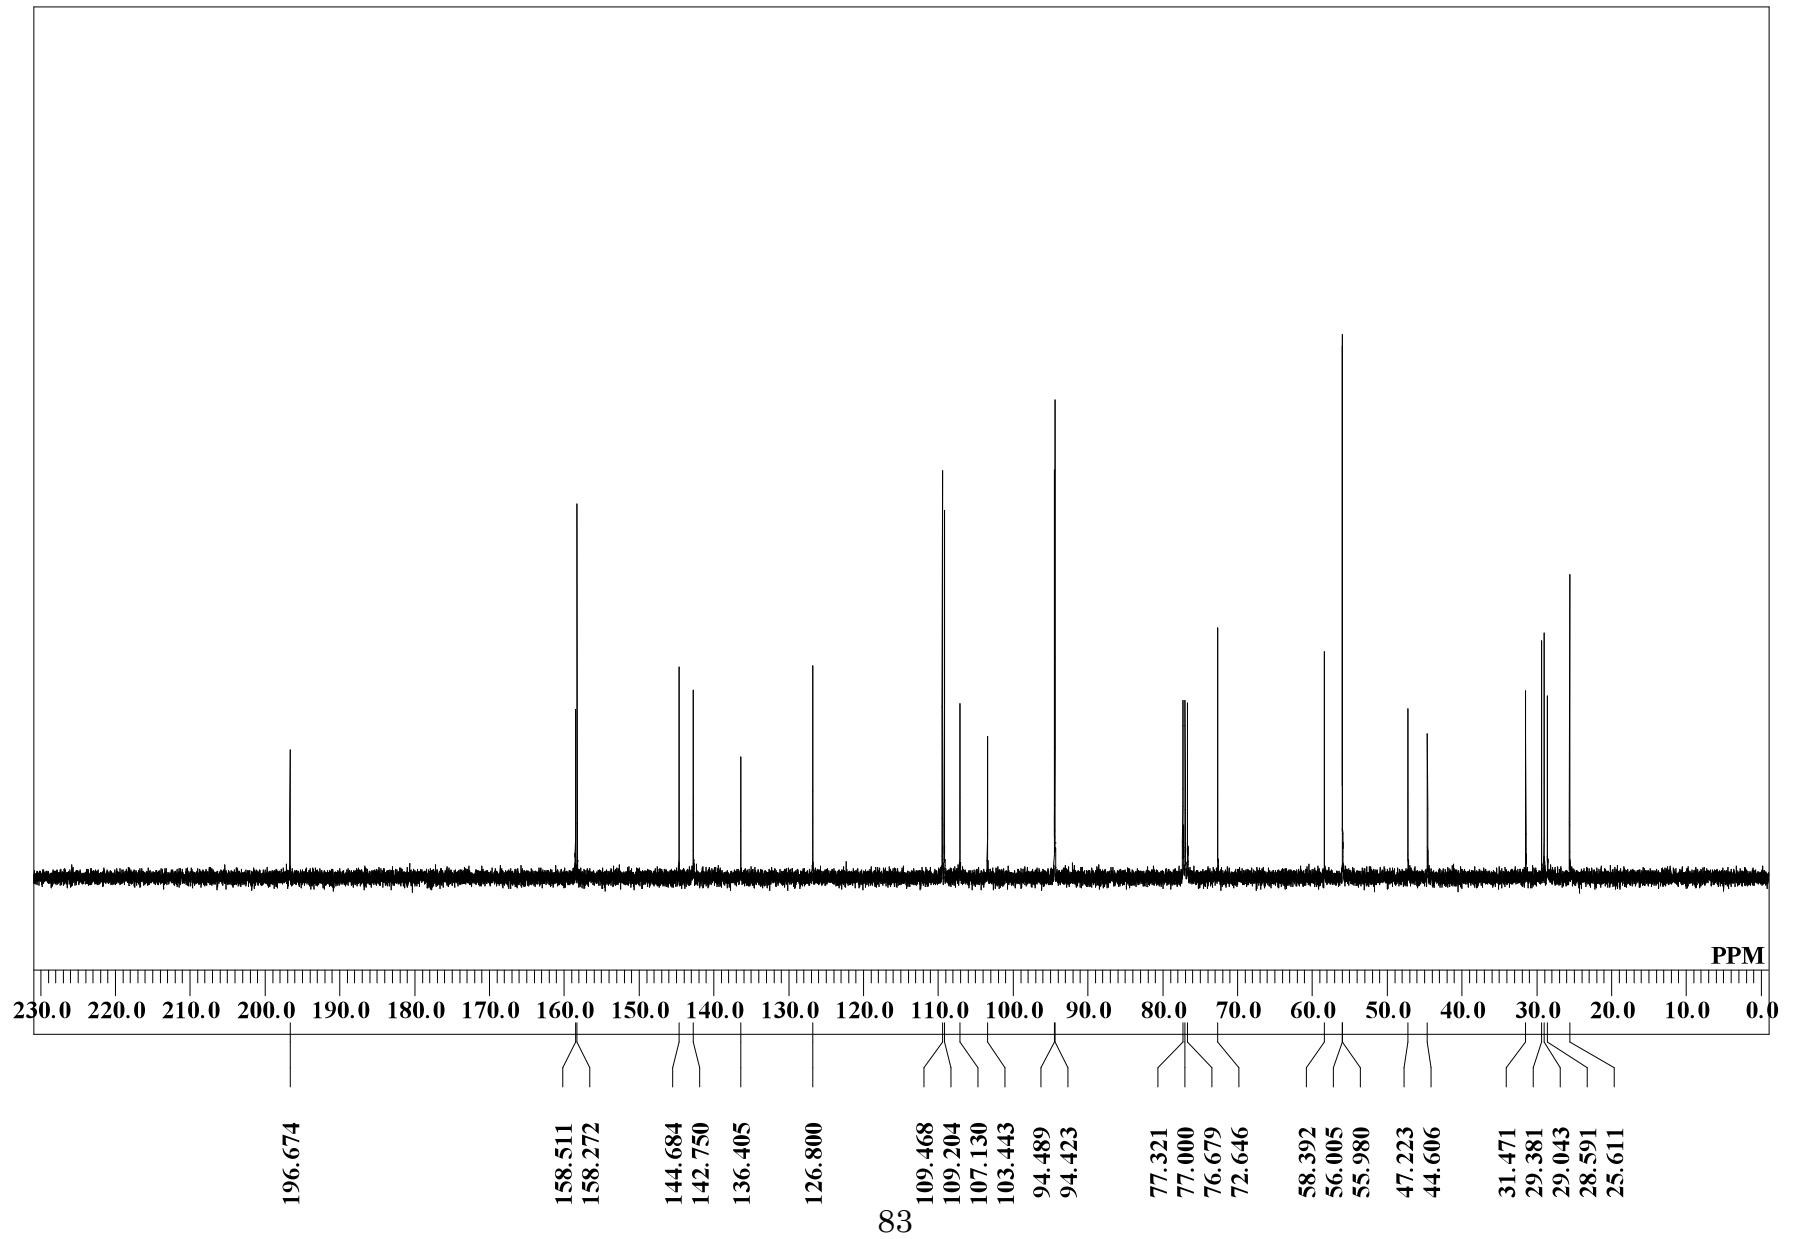

GO-Y187-1H

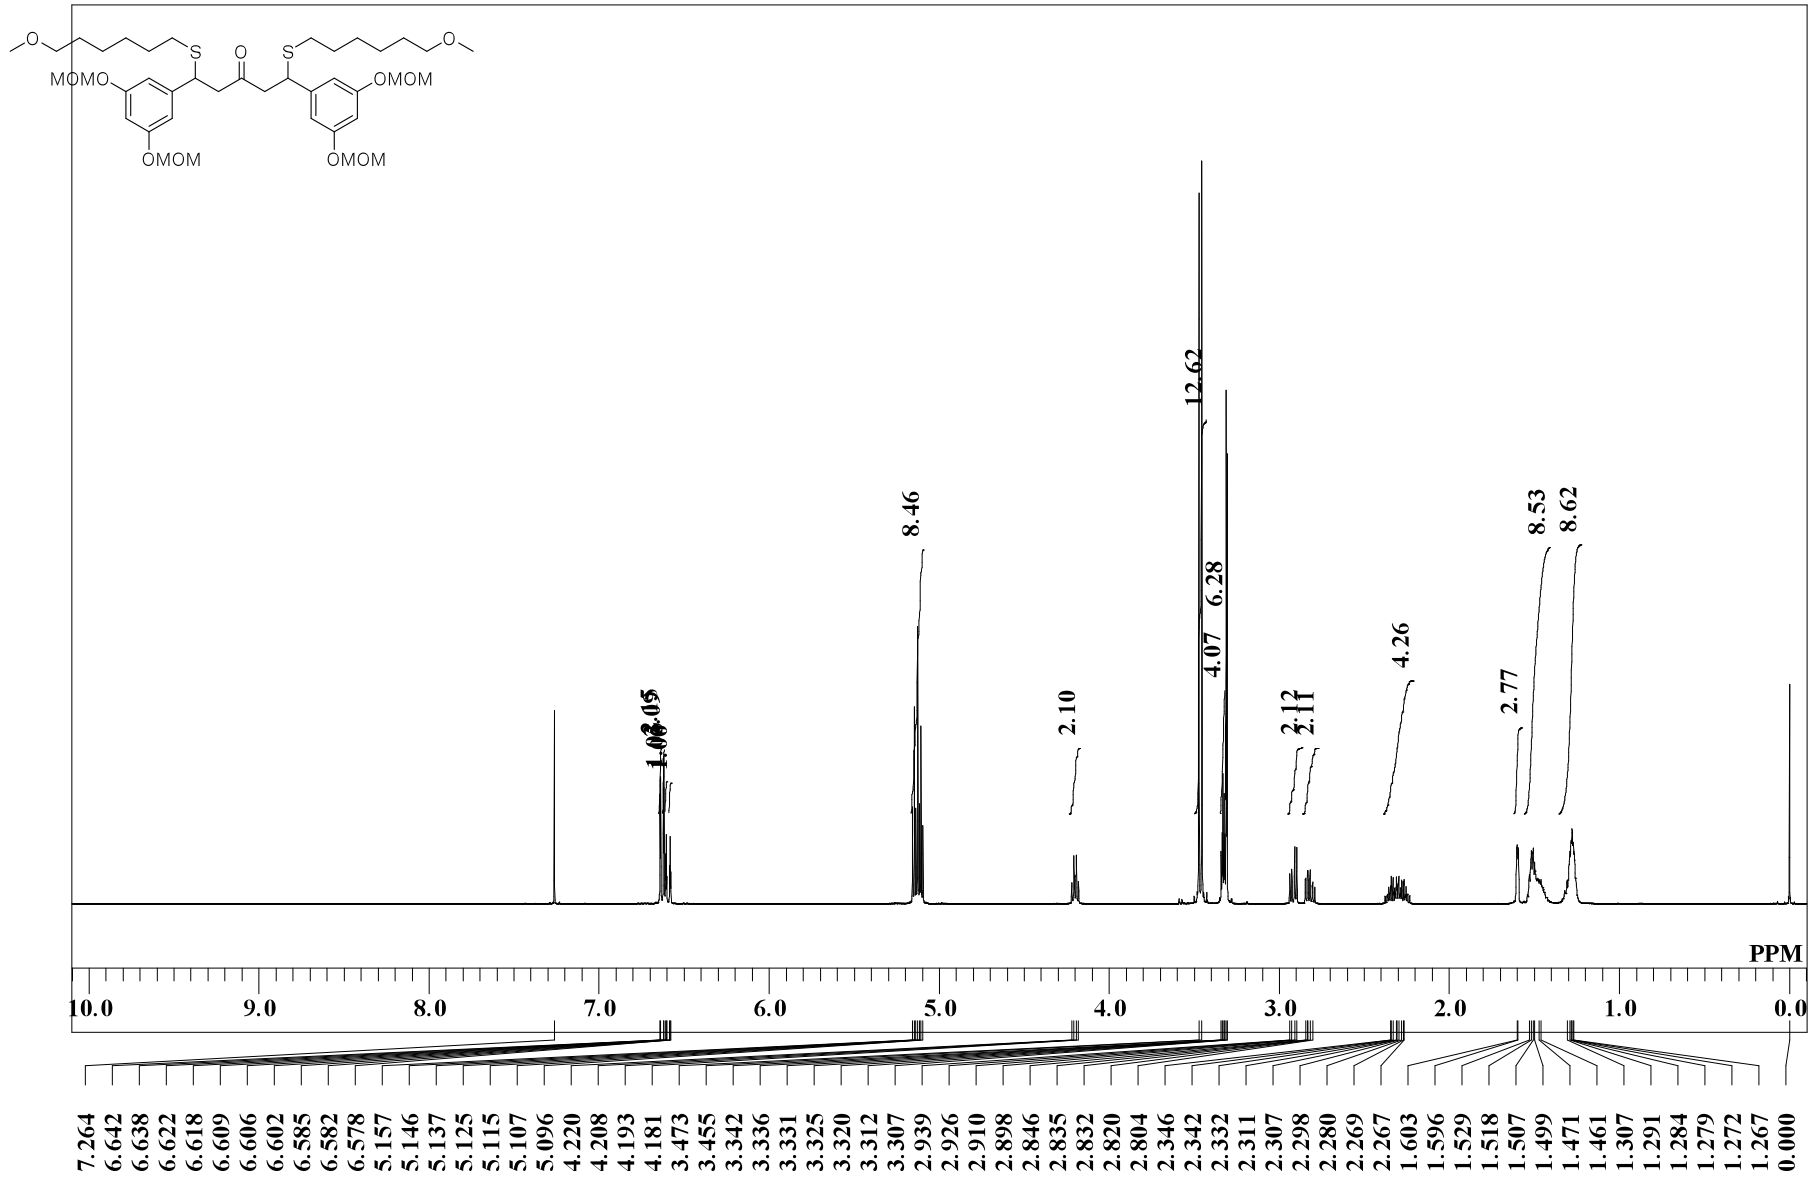

GO-Y187-13C

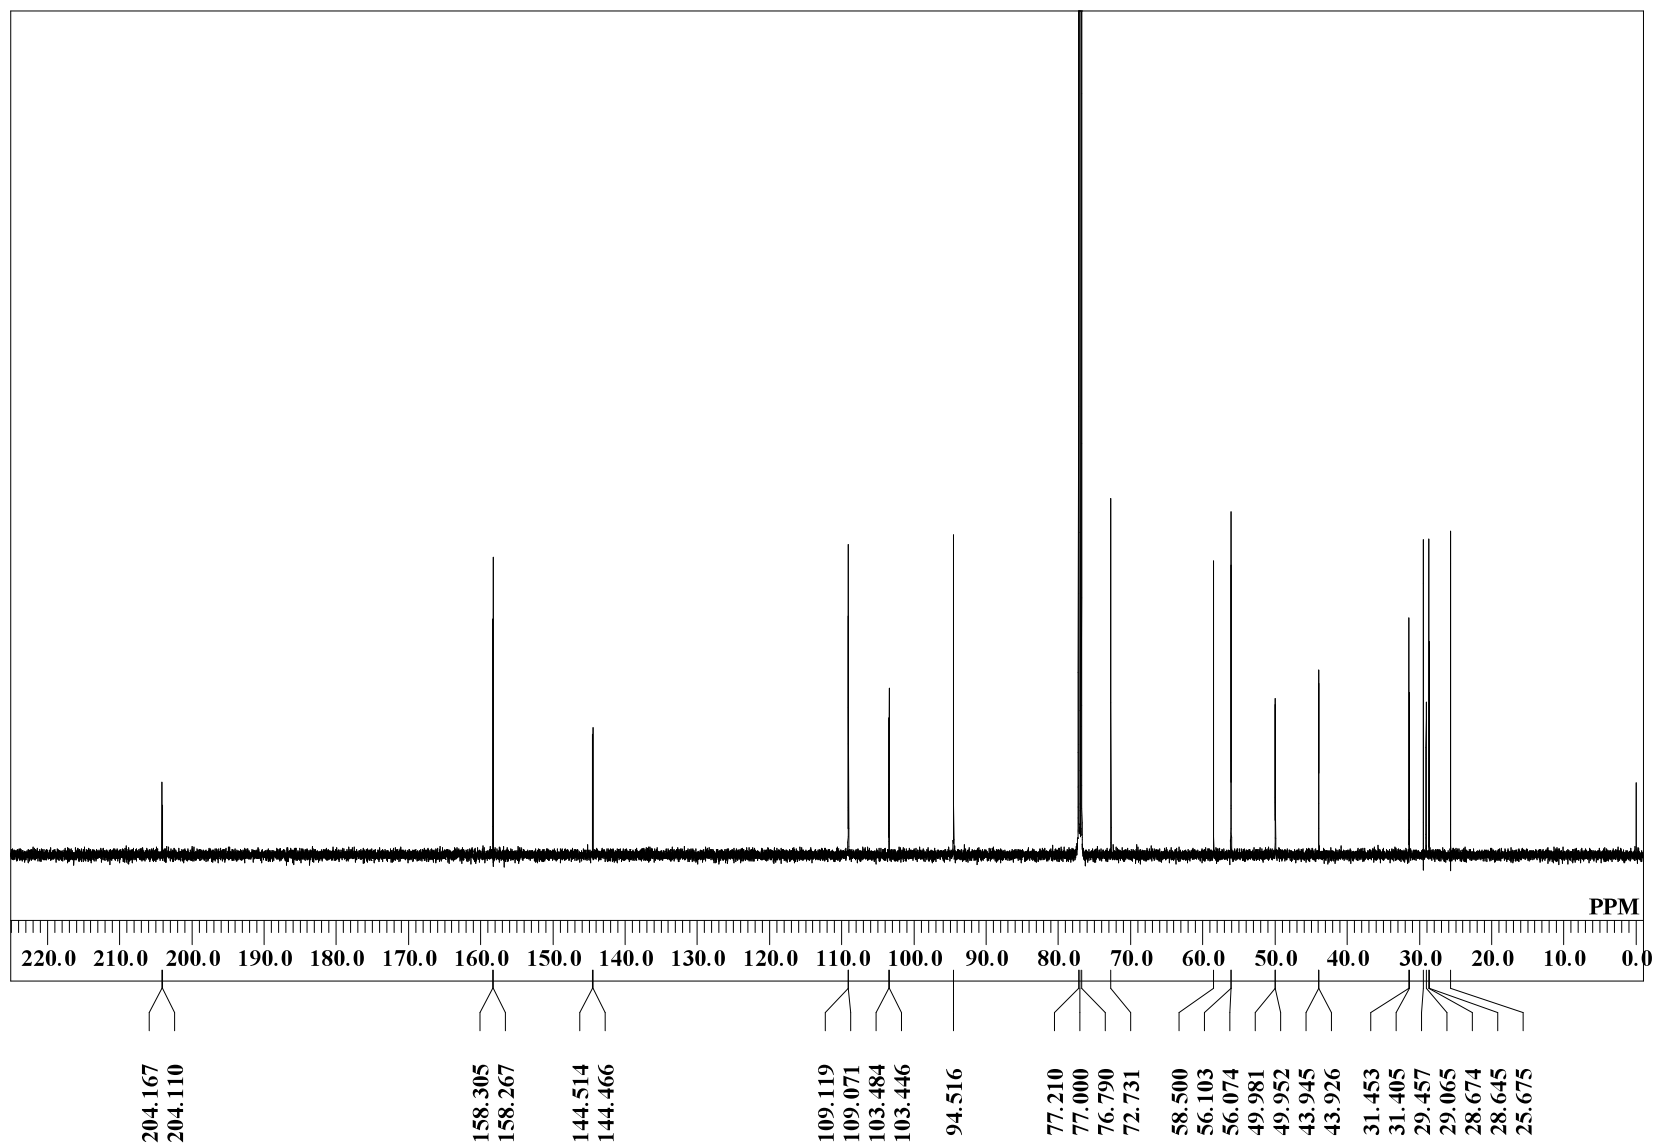

GO-Y188-1H

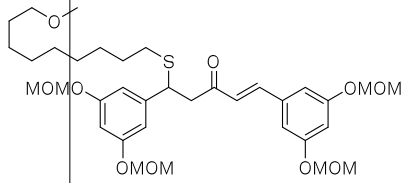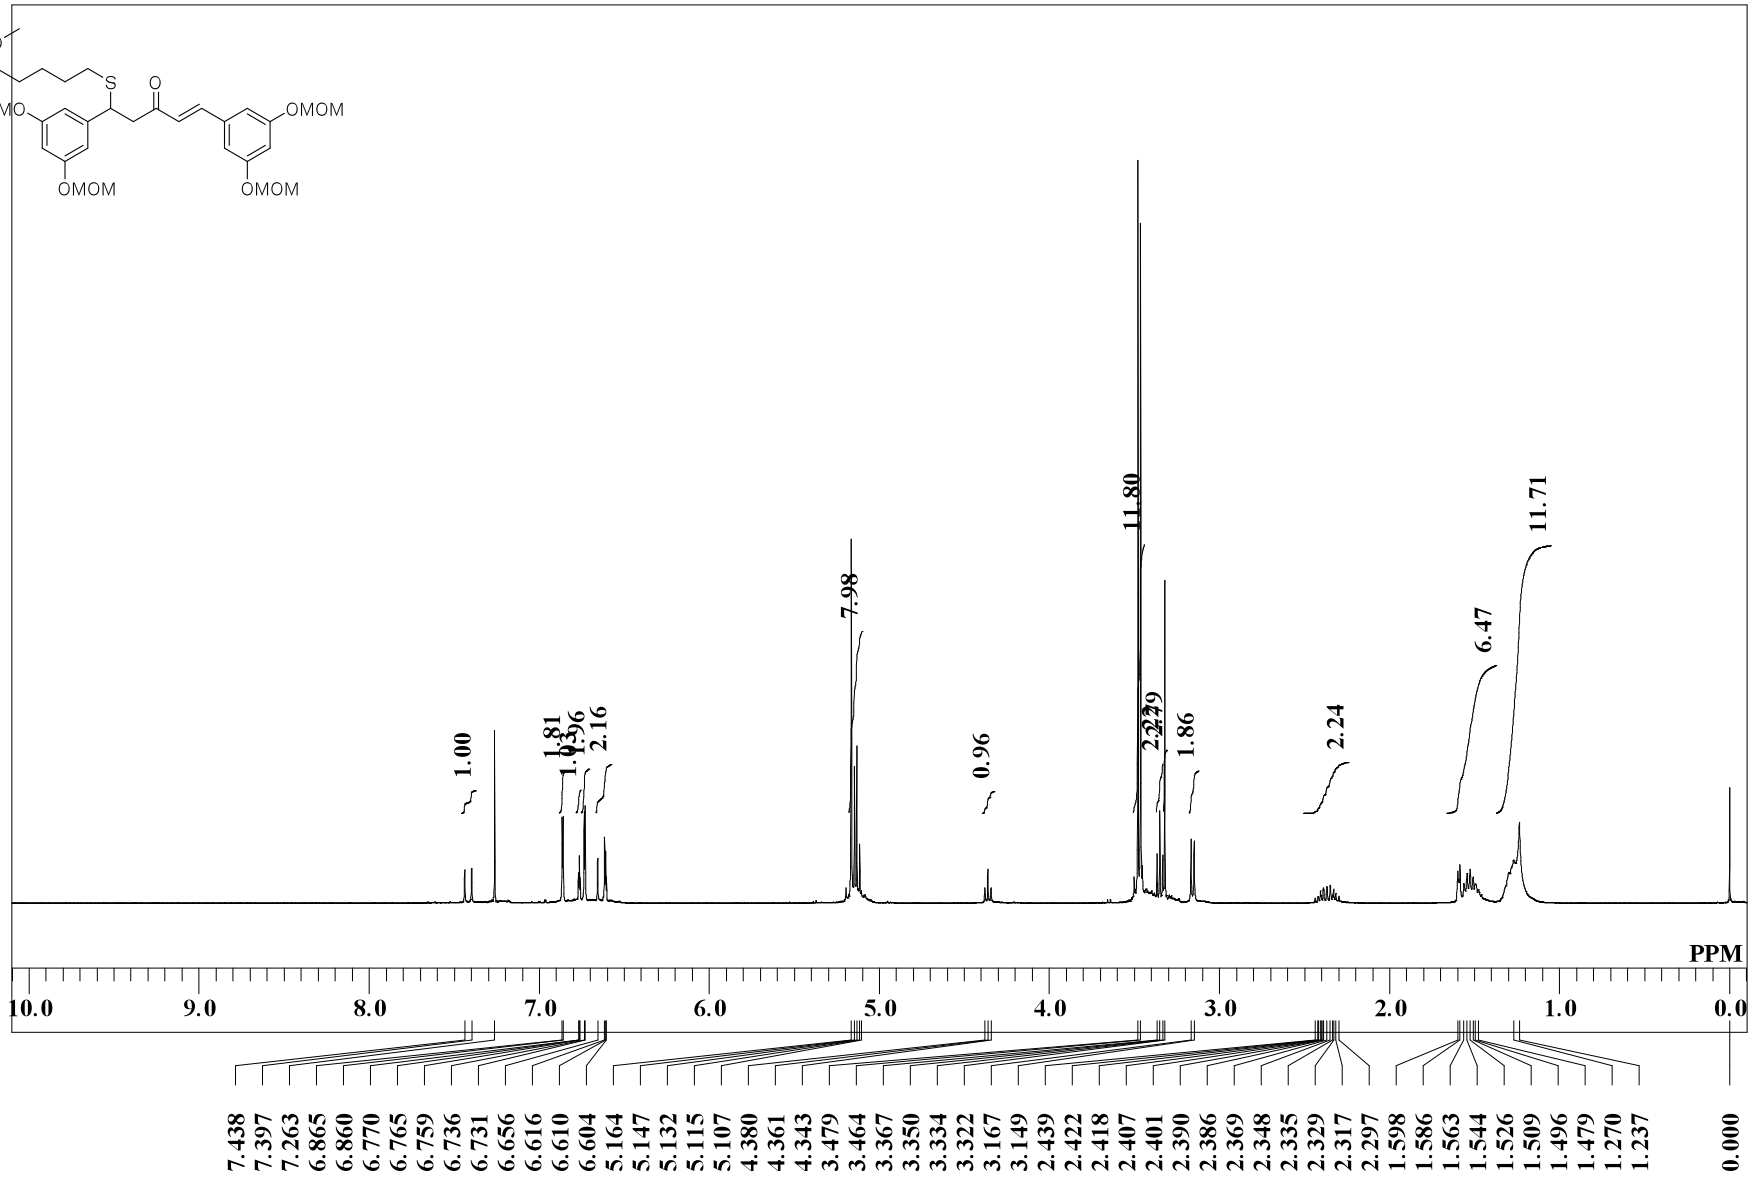

GO-Y188-13C

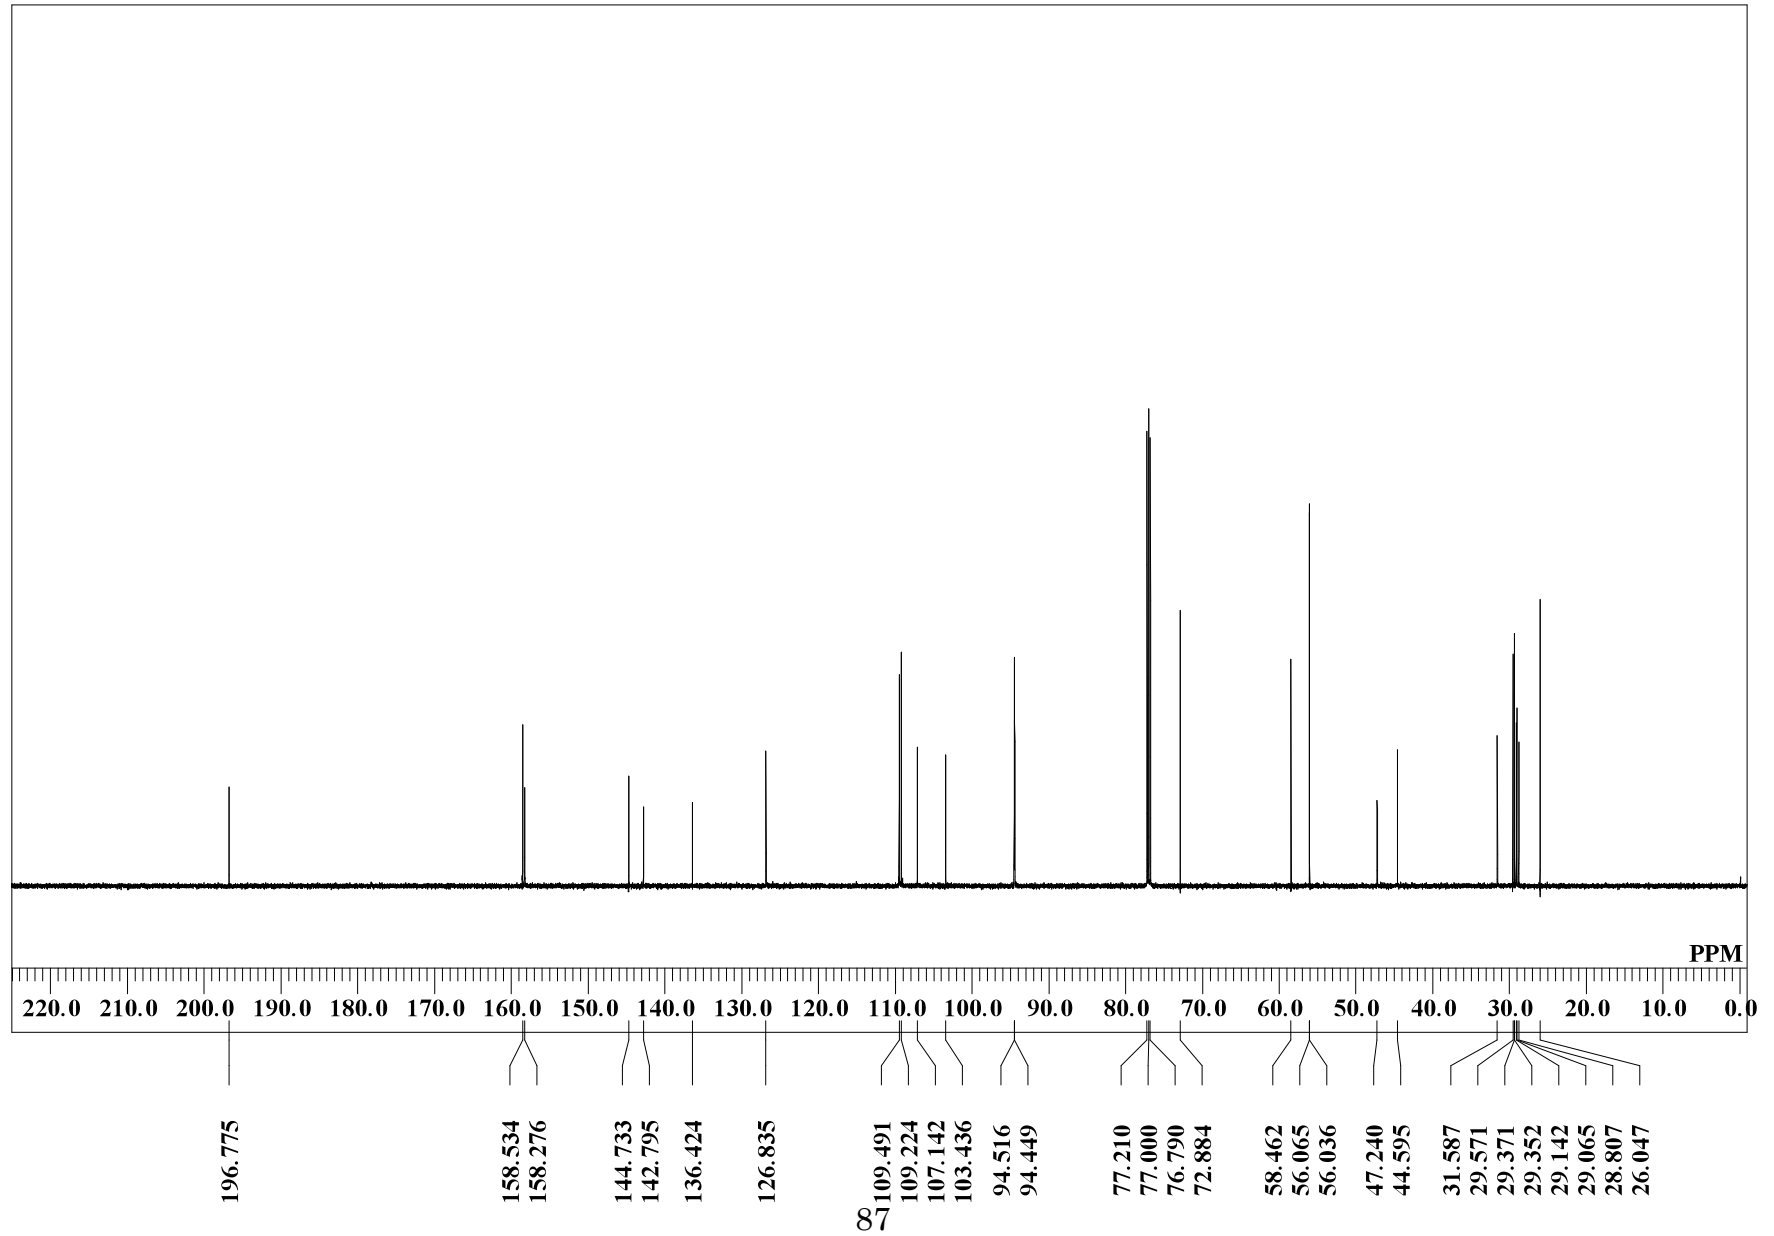

GO-Y189-1H

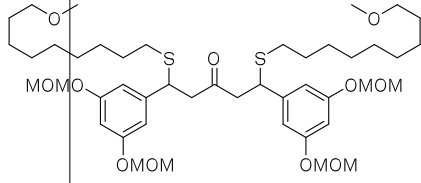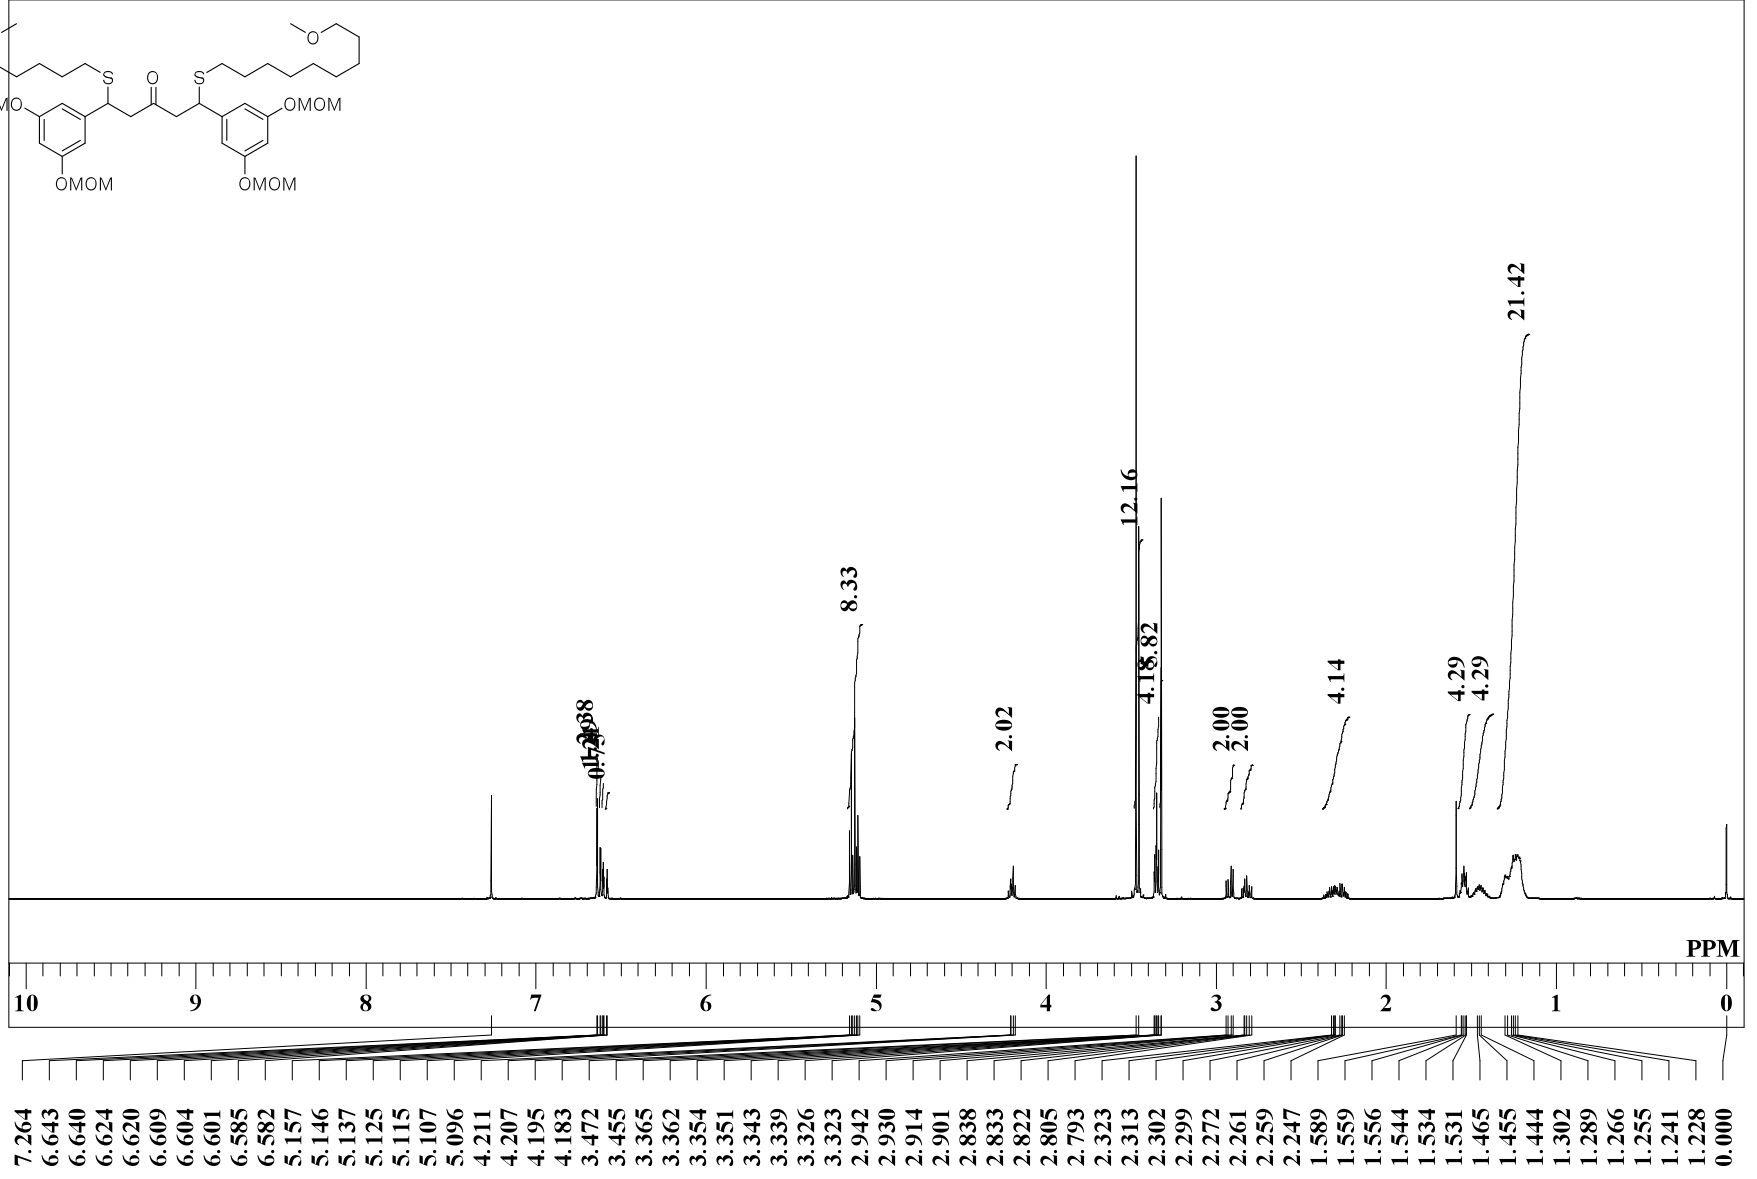



GO-Y189-13C

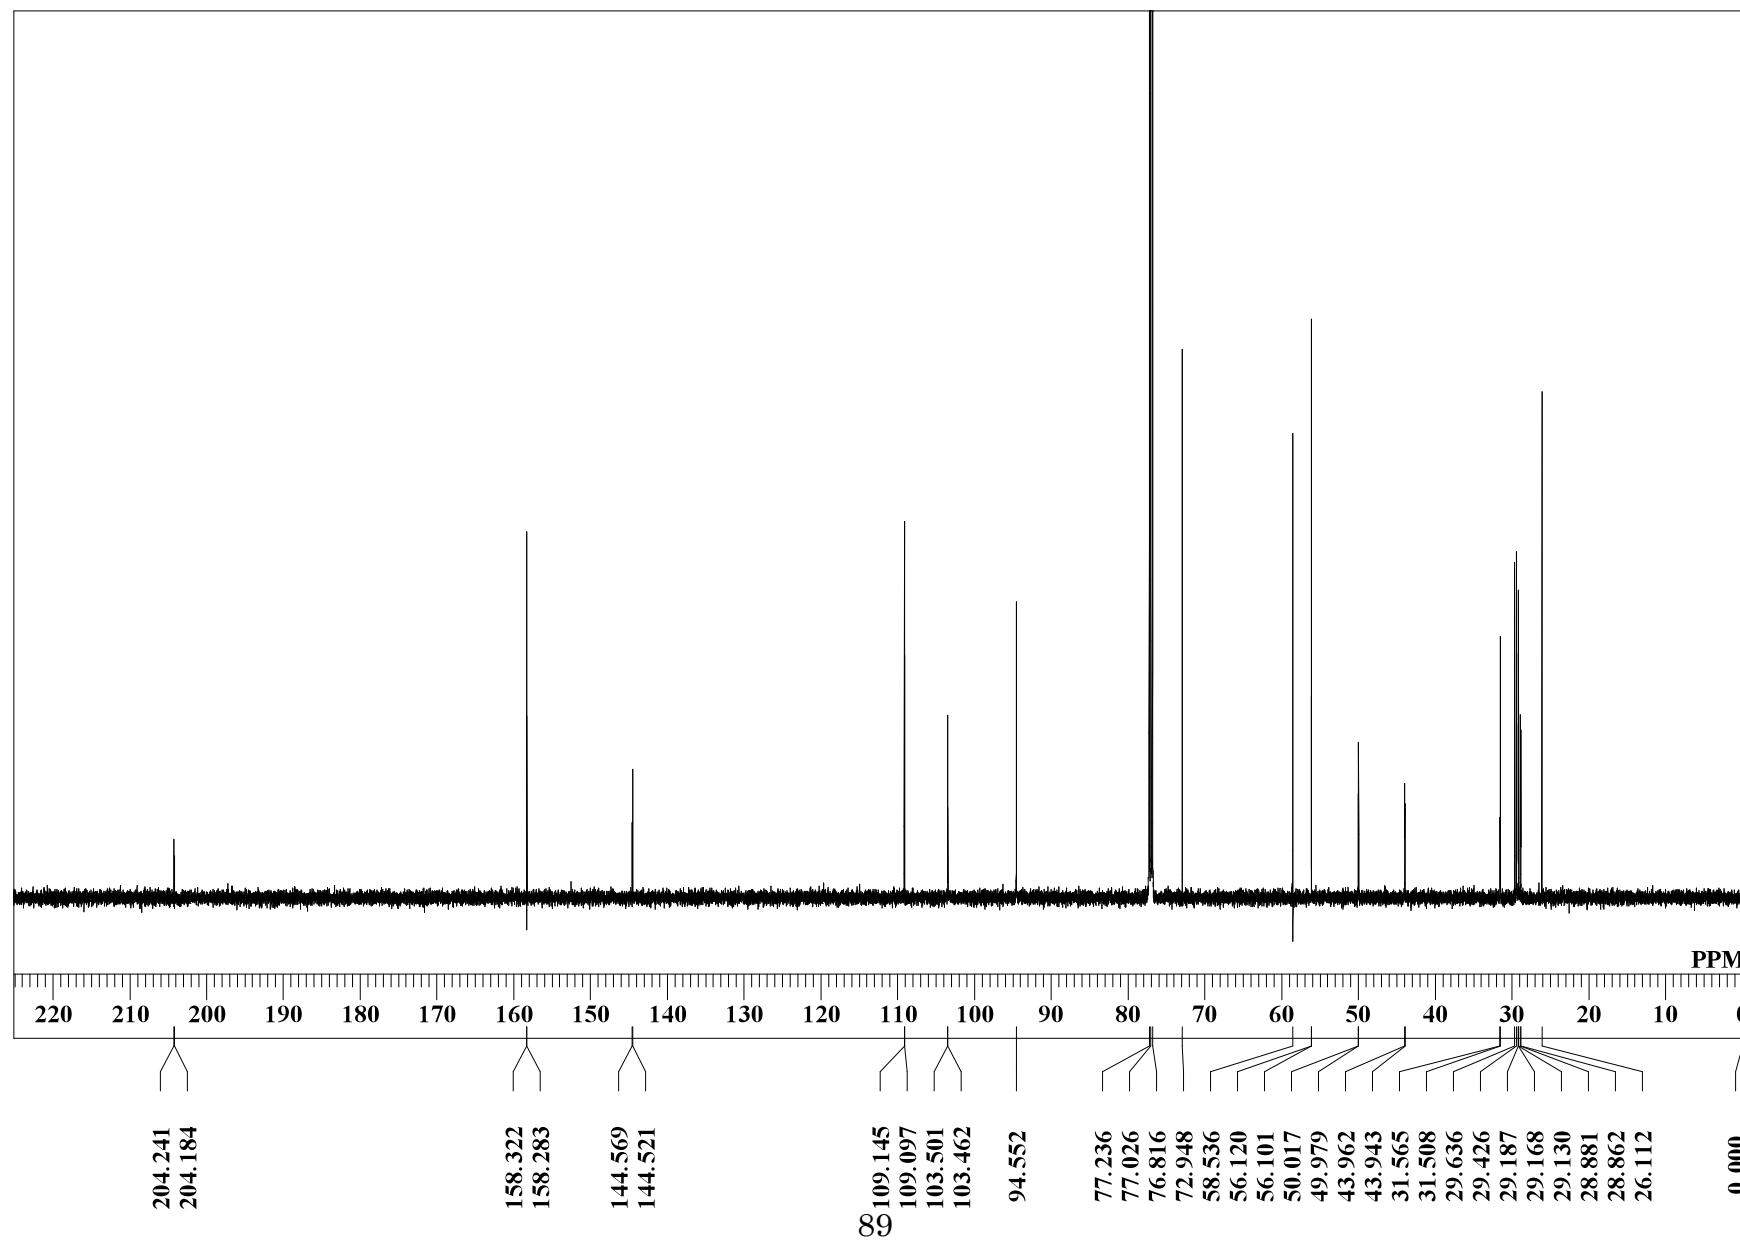

(MeOC4H8S)2 1H

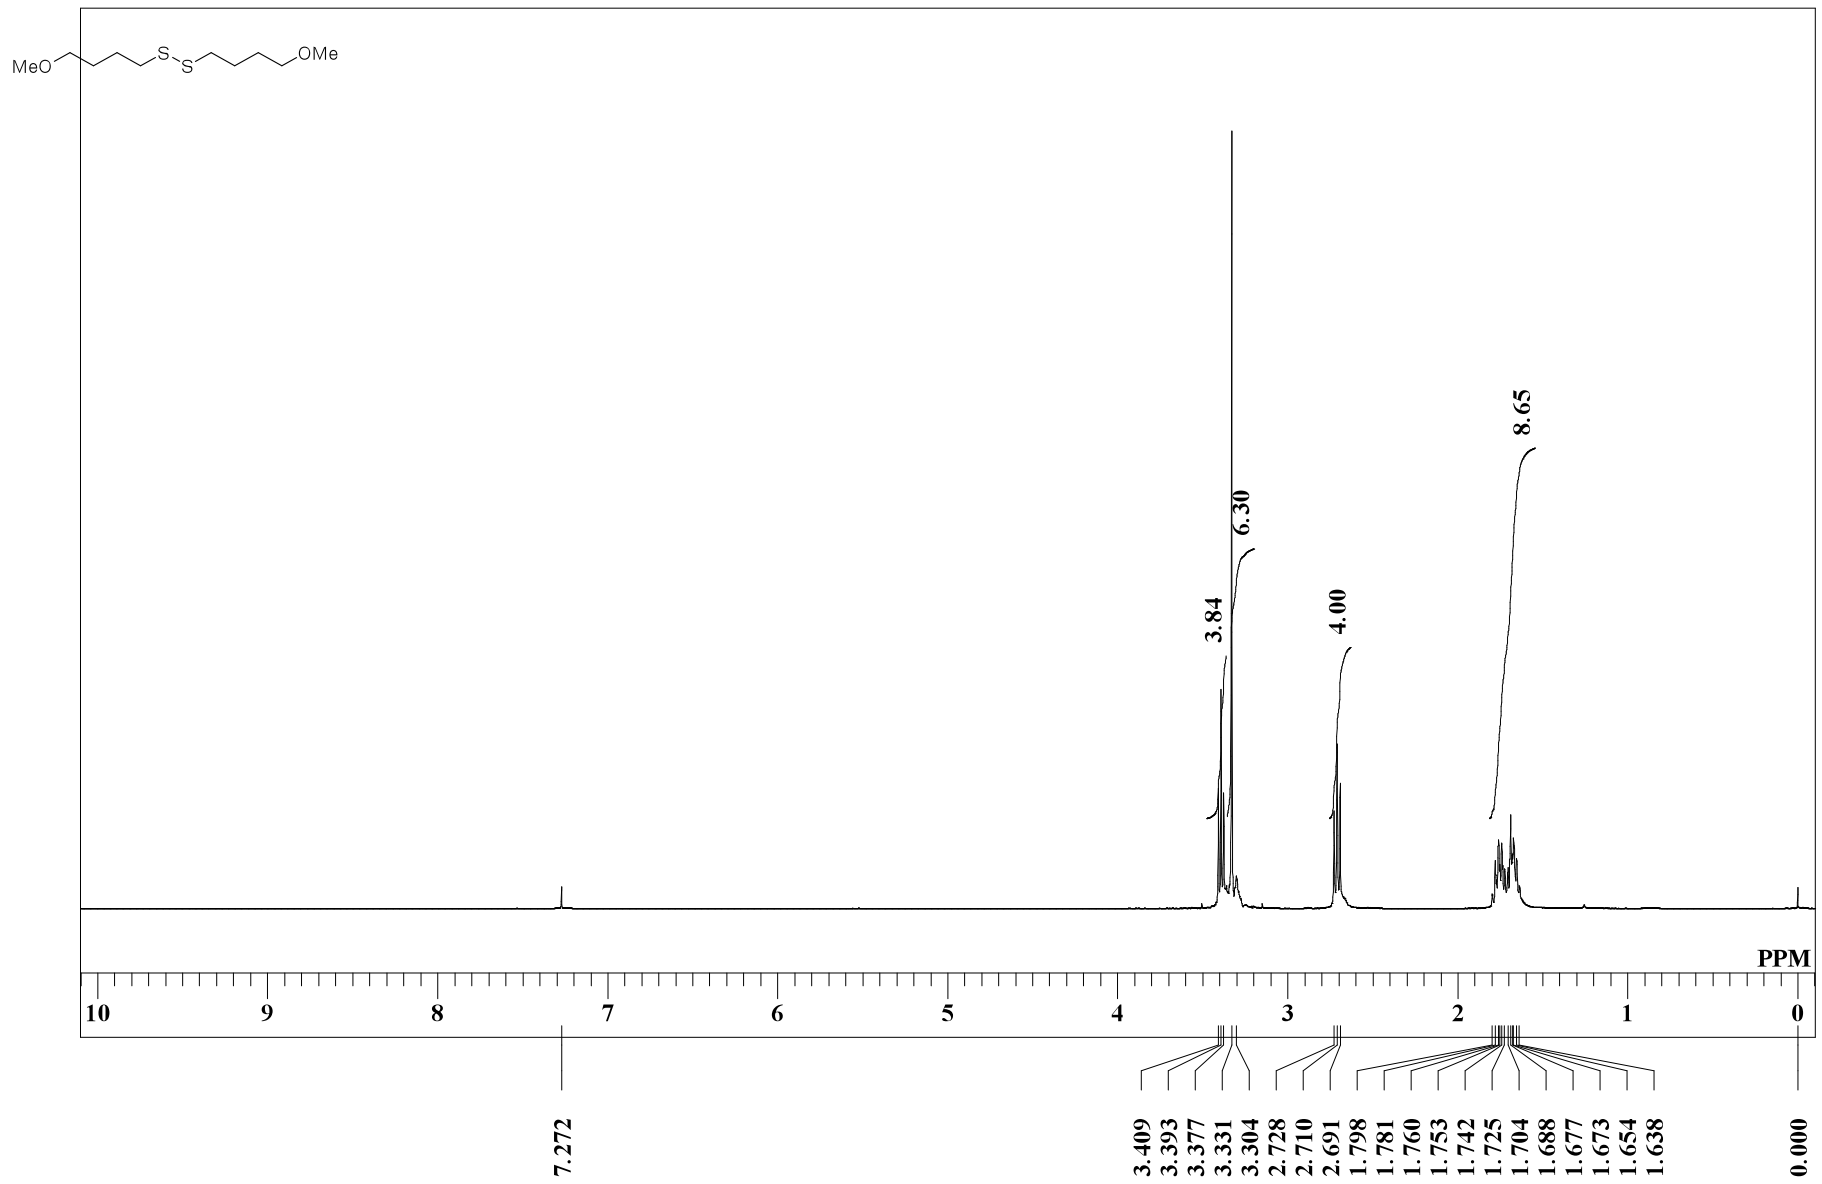

(MeOC4H8S)2-13C

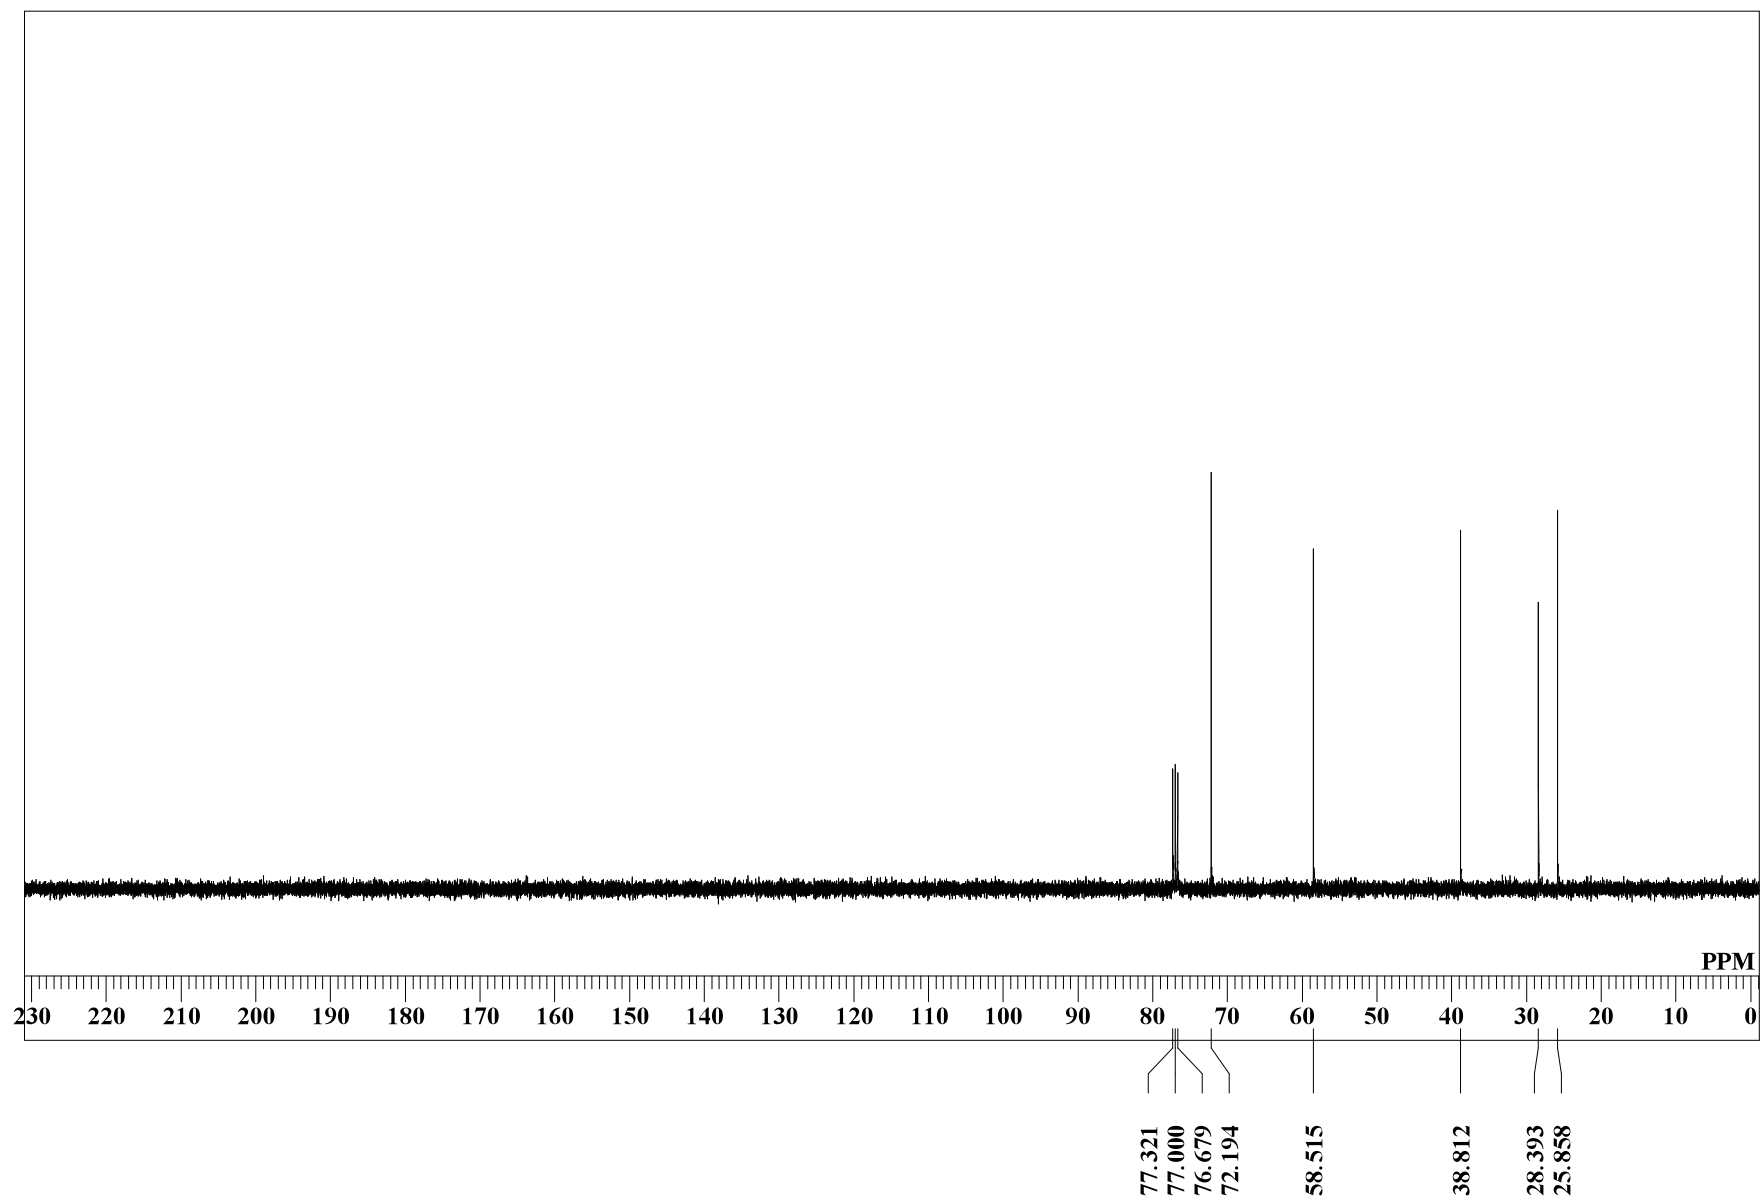

(MeOC6H12S)2-1H

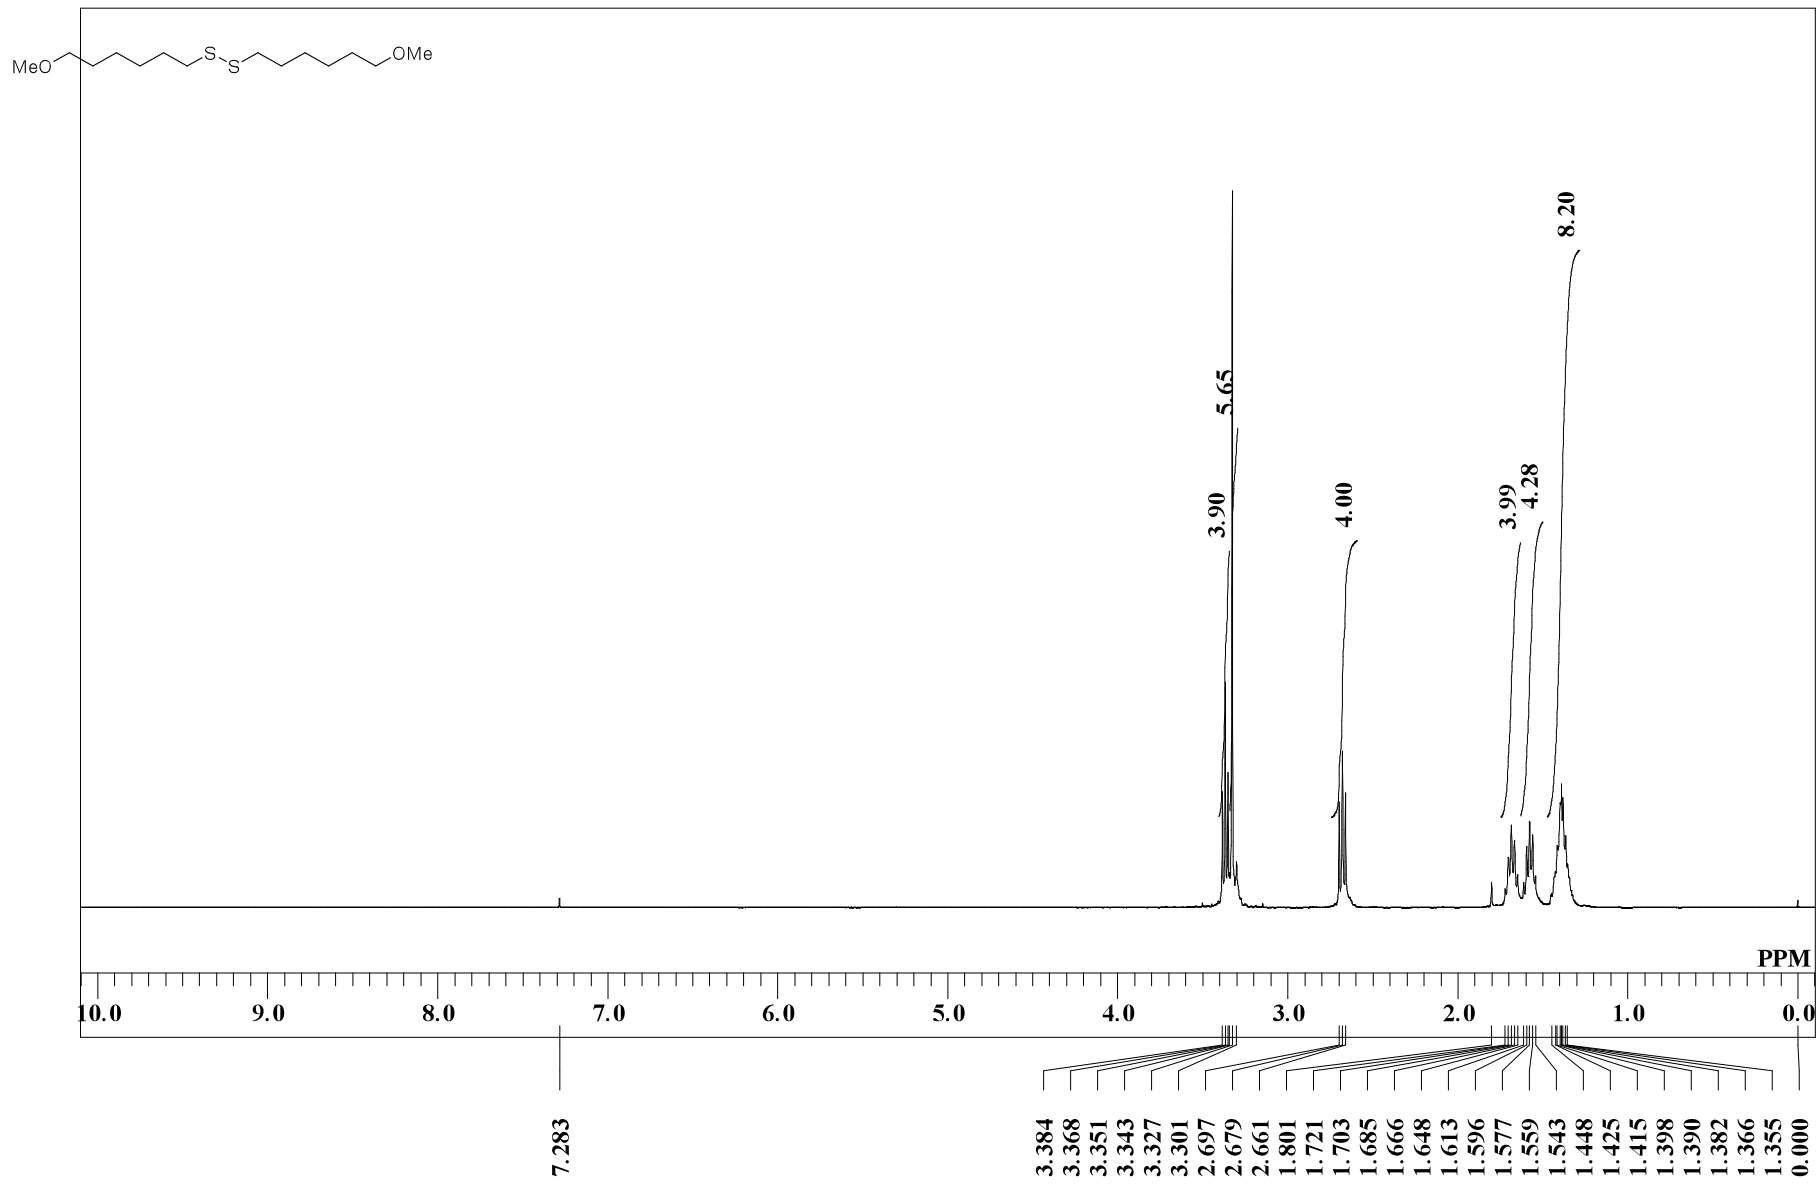

(MeOC6H12S)2-13C

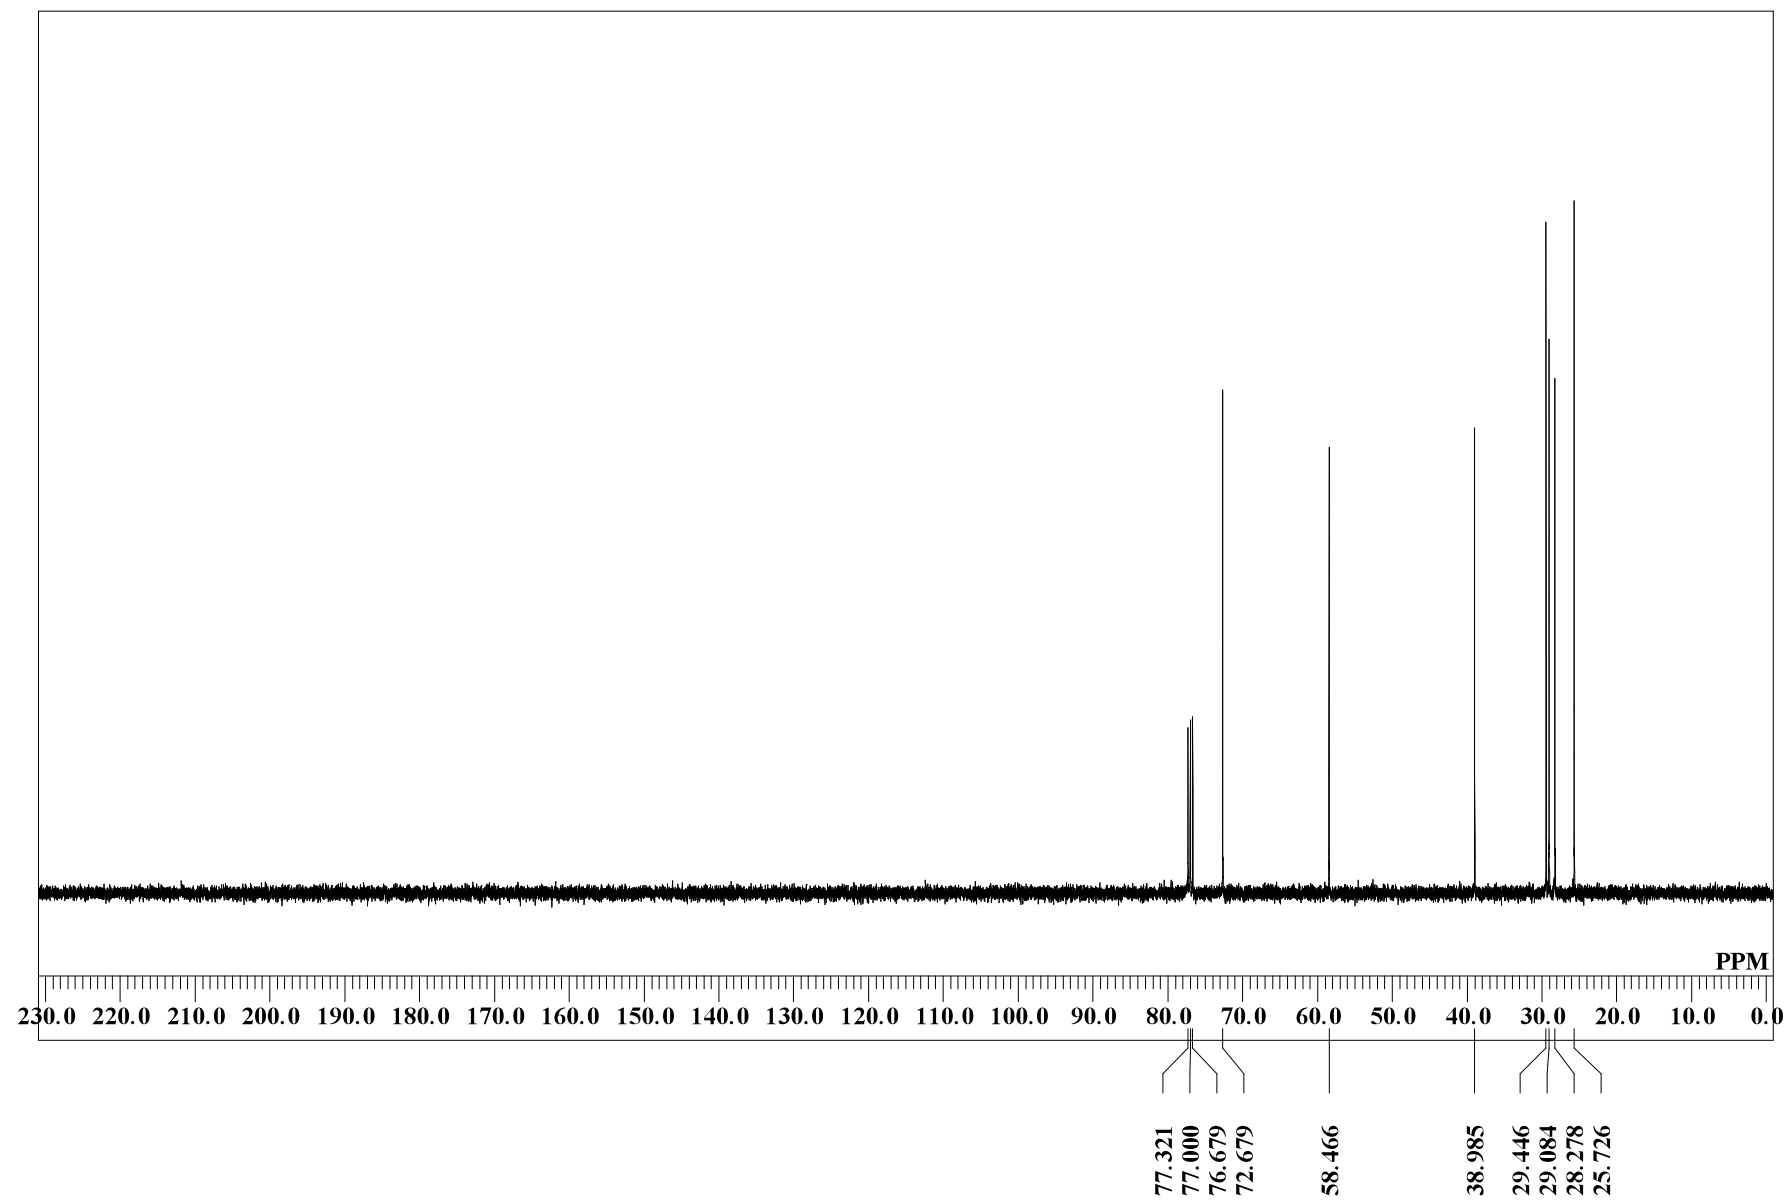

(MeOC9H18S)2-1H

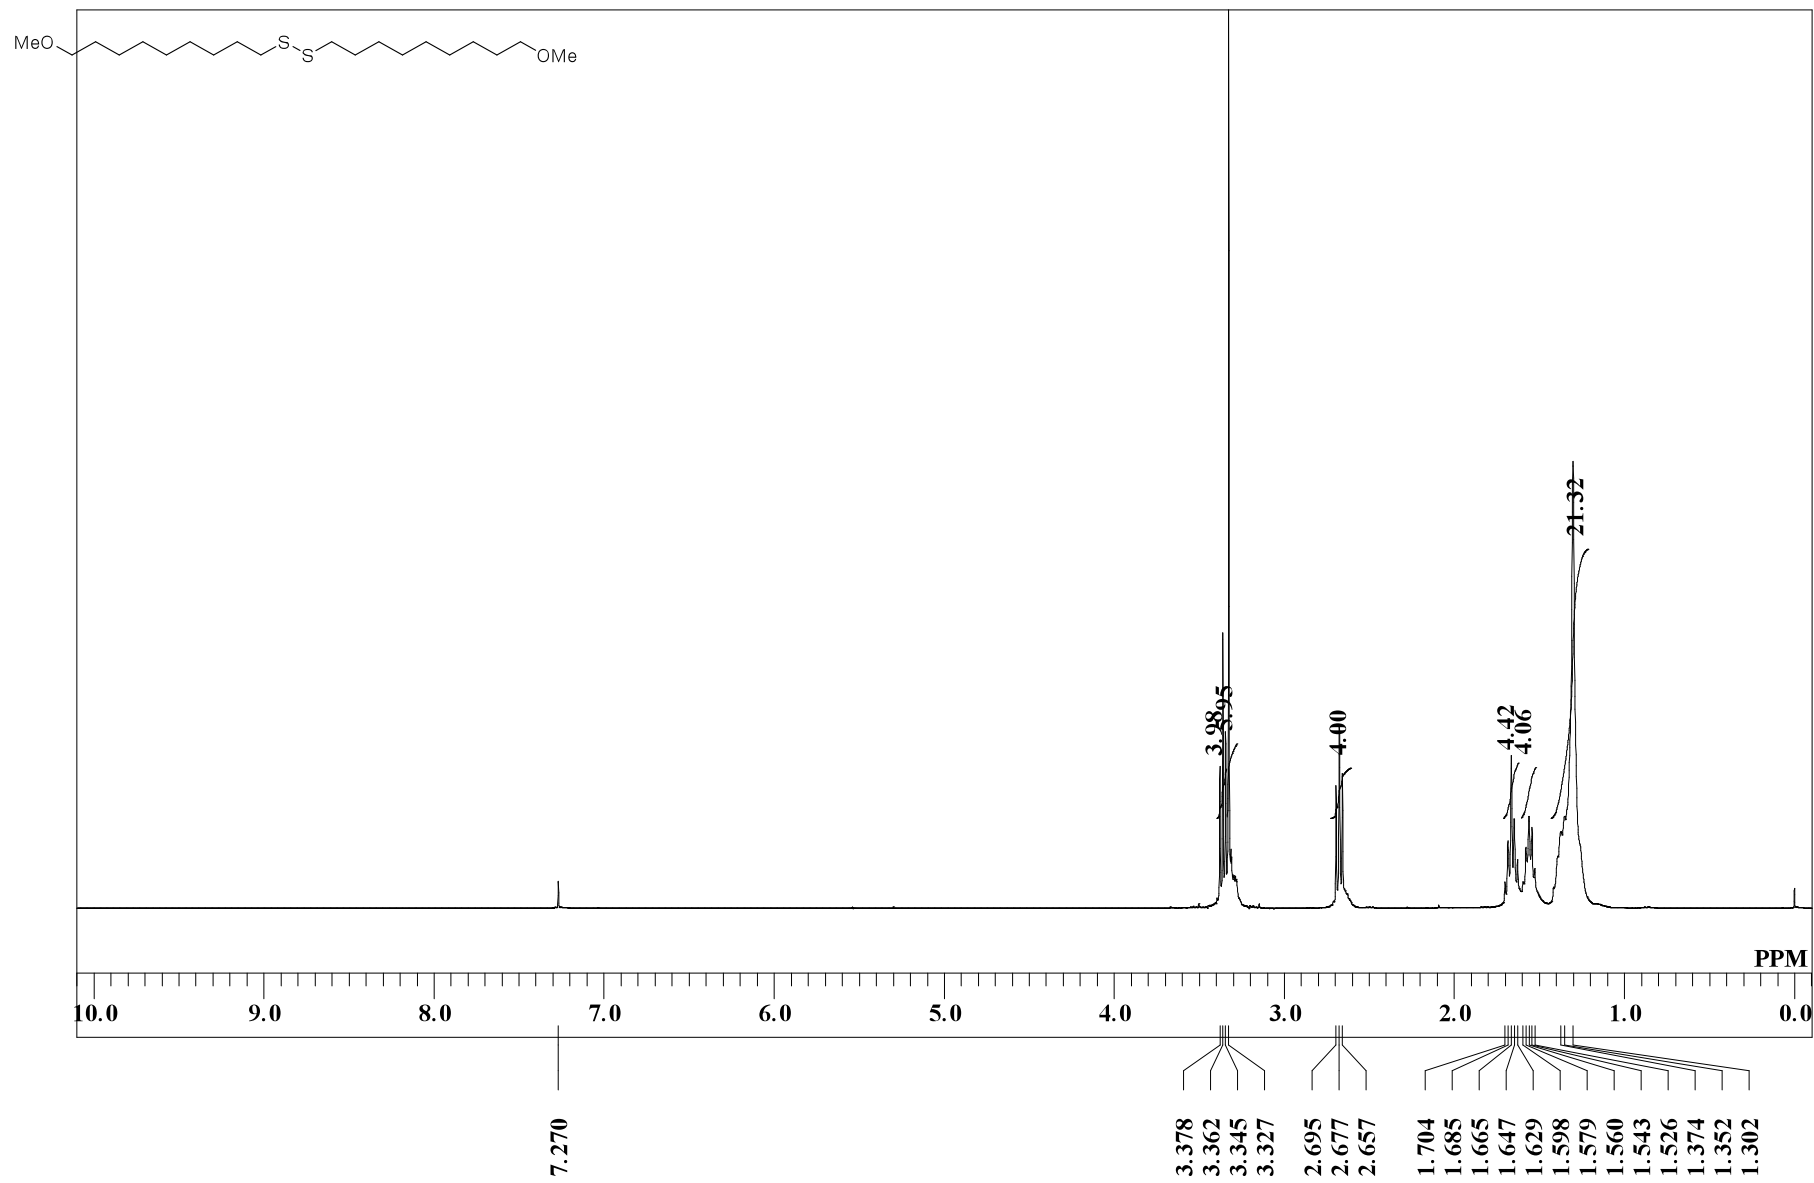

MeO(CH<sub>2</sub>)<sub>9</sub>SH- 13C

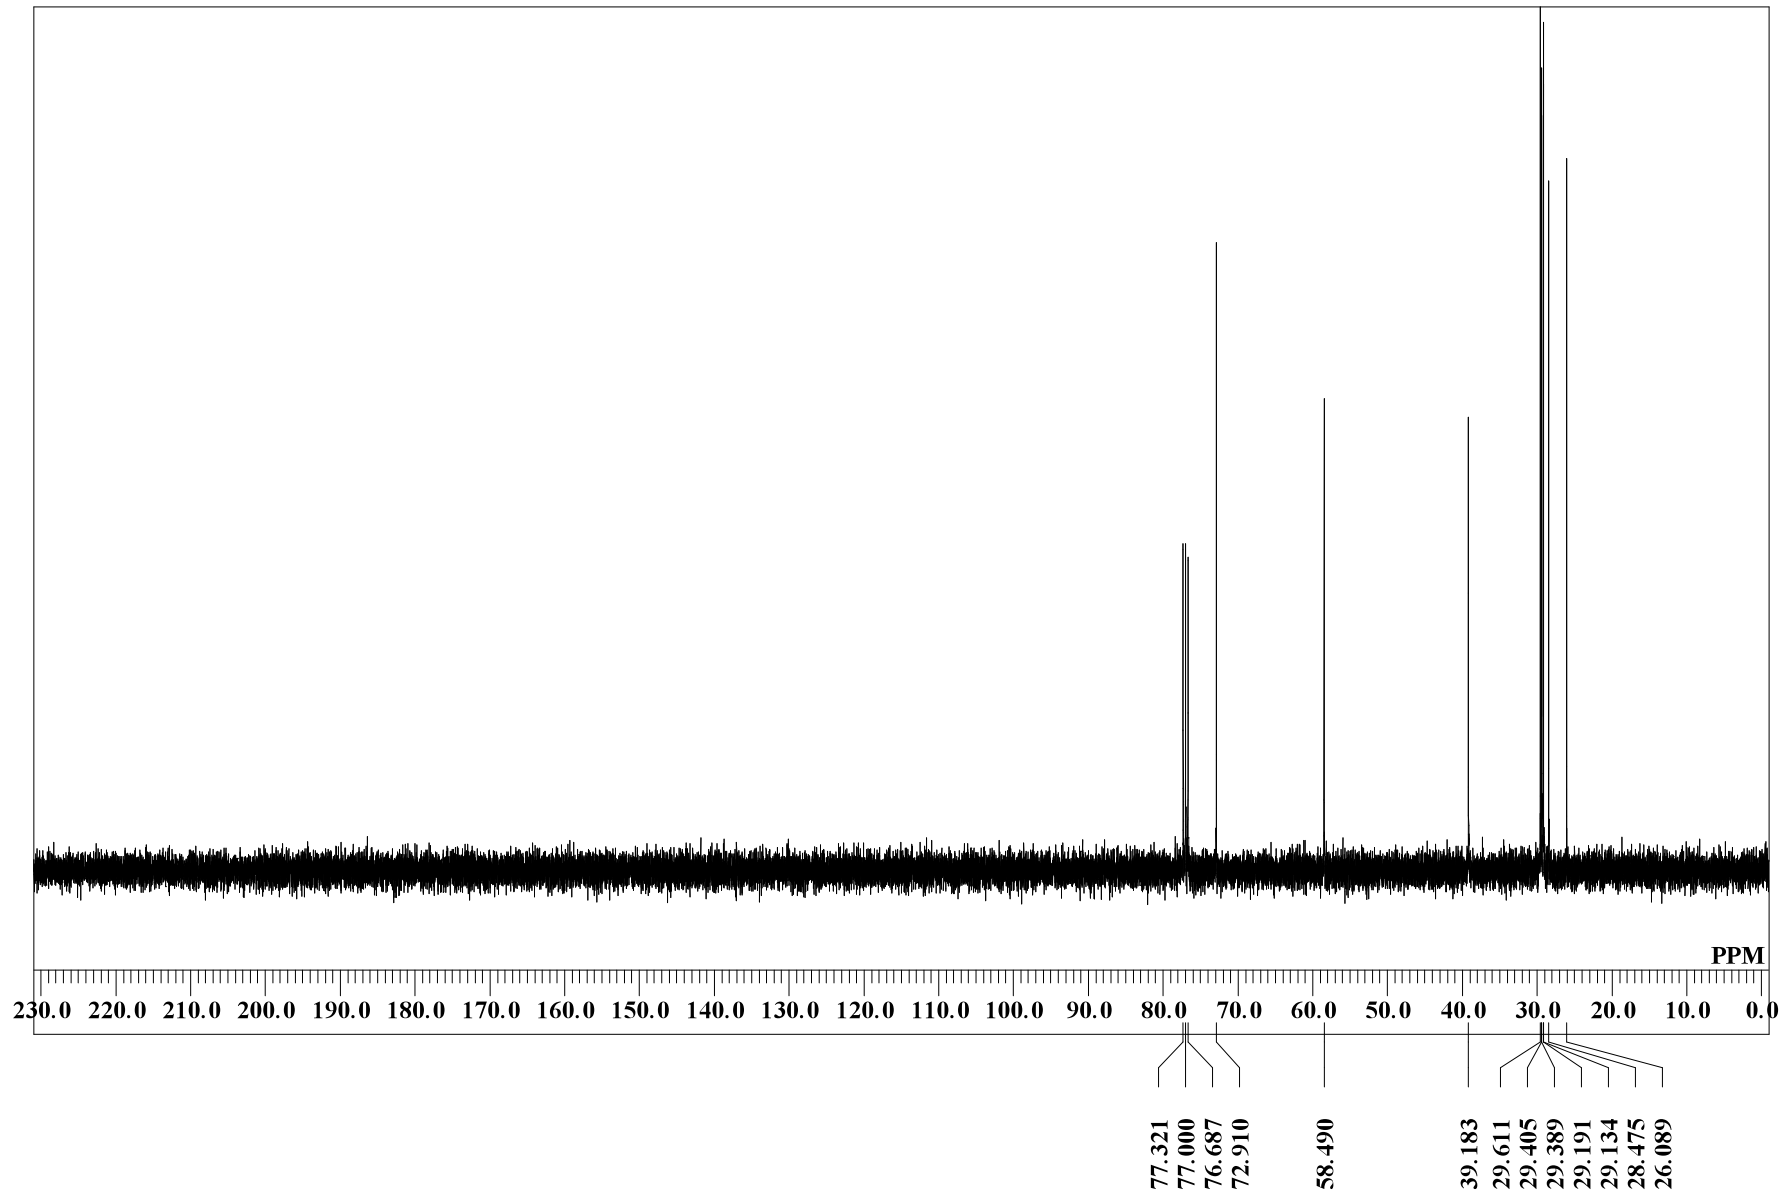

1) GO-Y030 in DMSO-*d*<sub>6</sub>: CDCl<sub>3</sub> (1 : 20)

GO-Y030 in DMSO-*d*<sub>6</sub>:CDCl<sub>3</sub>

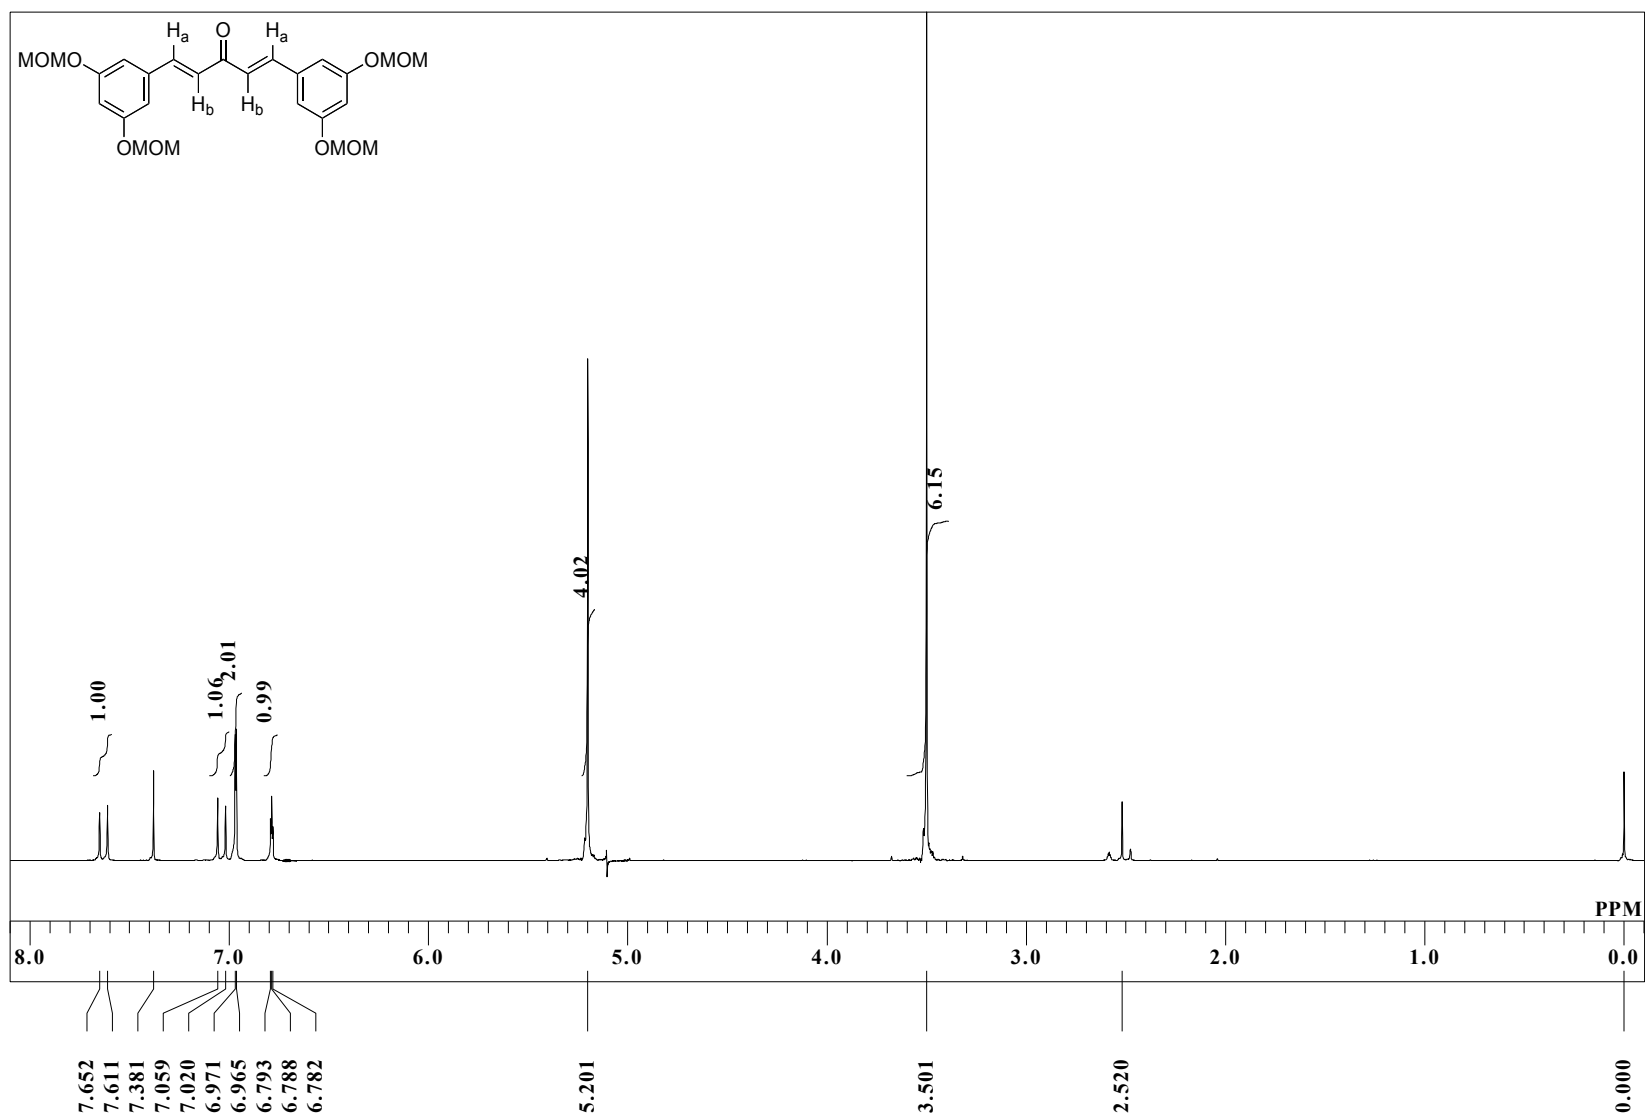



2) Reaction mixture A 5 min after dilution with  $\text{CDCl}_3$   
GO-Y030+cyst. diluted with  $\text{CDCl}_3$  (5 min)

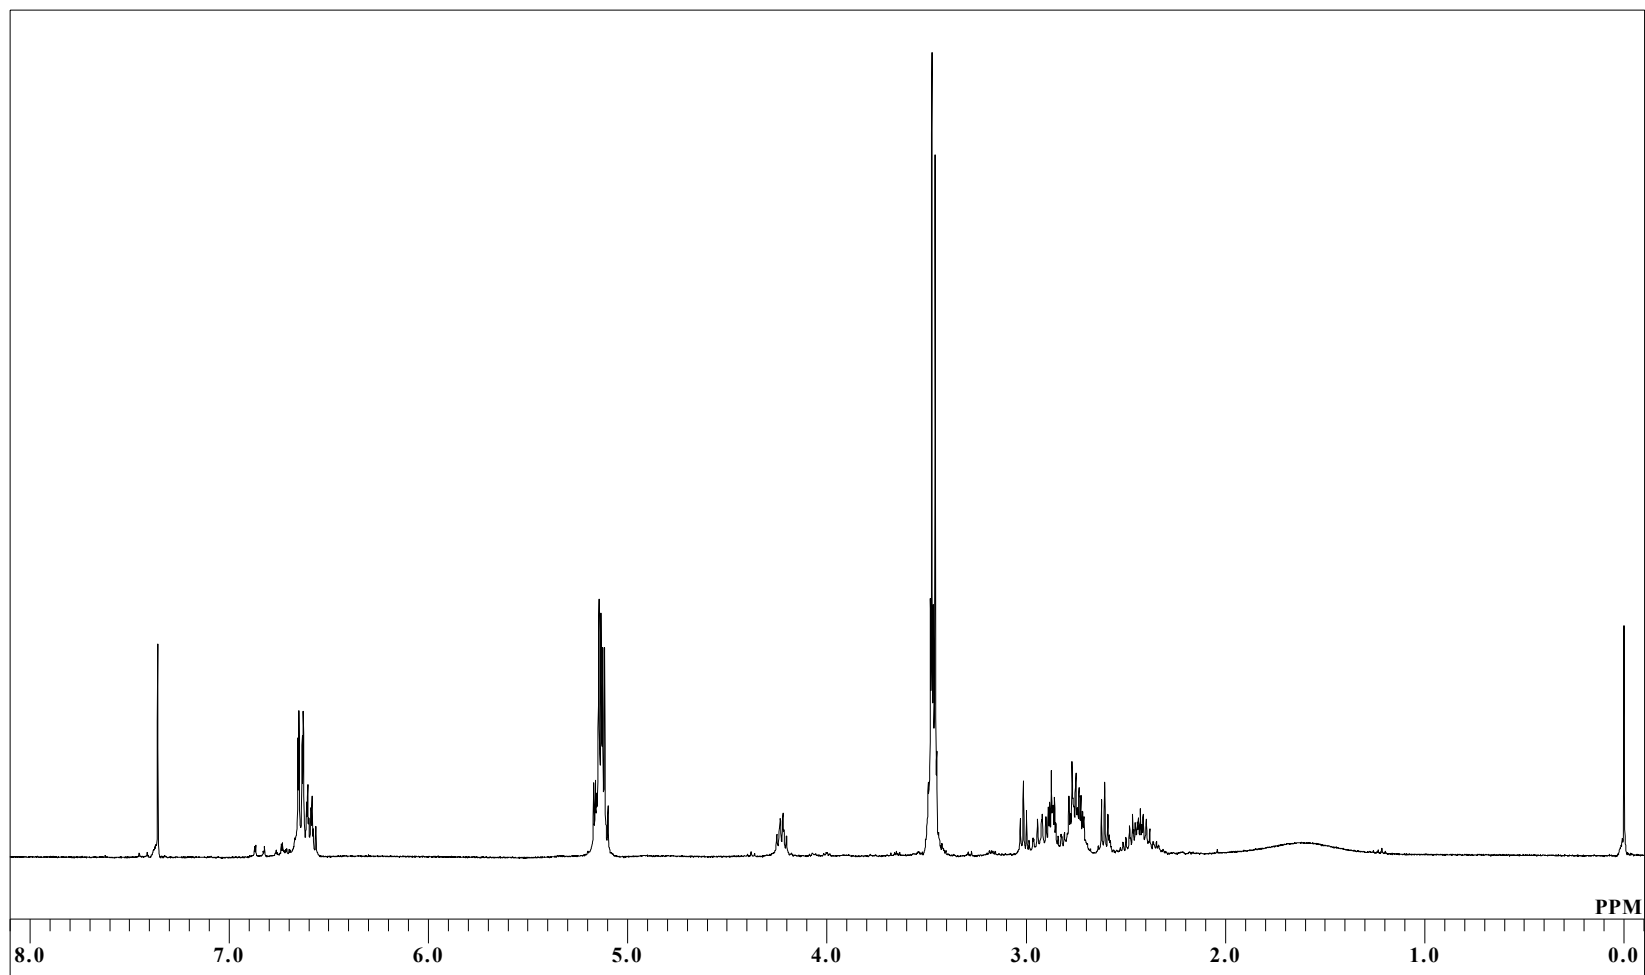

### 3) Reaction mixture A after dilution with CDCl<sub>3</sub> (24 h)

Note the re-appearance of the enone signals at  $\delta$  7.63 and 7.04 ( $J = 16.0$  Hz, H<sub>a</sub> and H<sub>b</sub>, respectively).

GO-Y030+cyst. diluted with CDCl<sub>3</sub> (24 h)

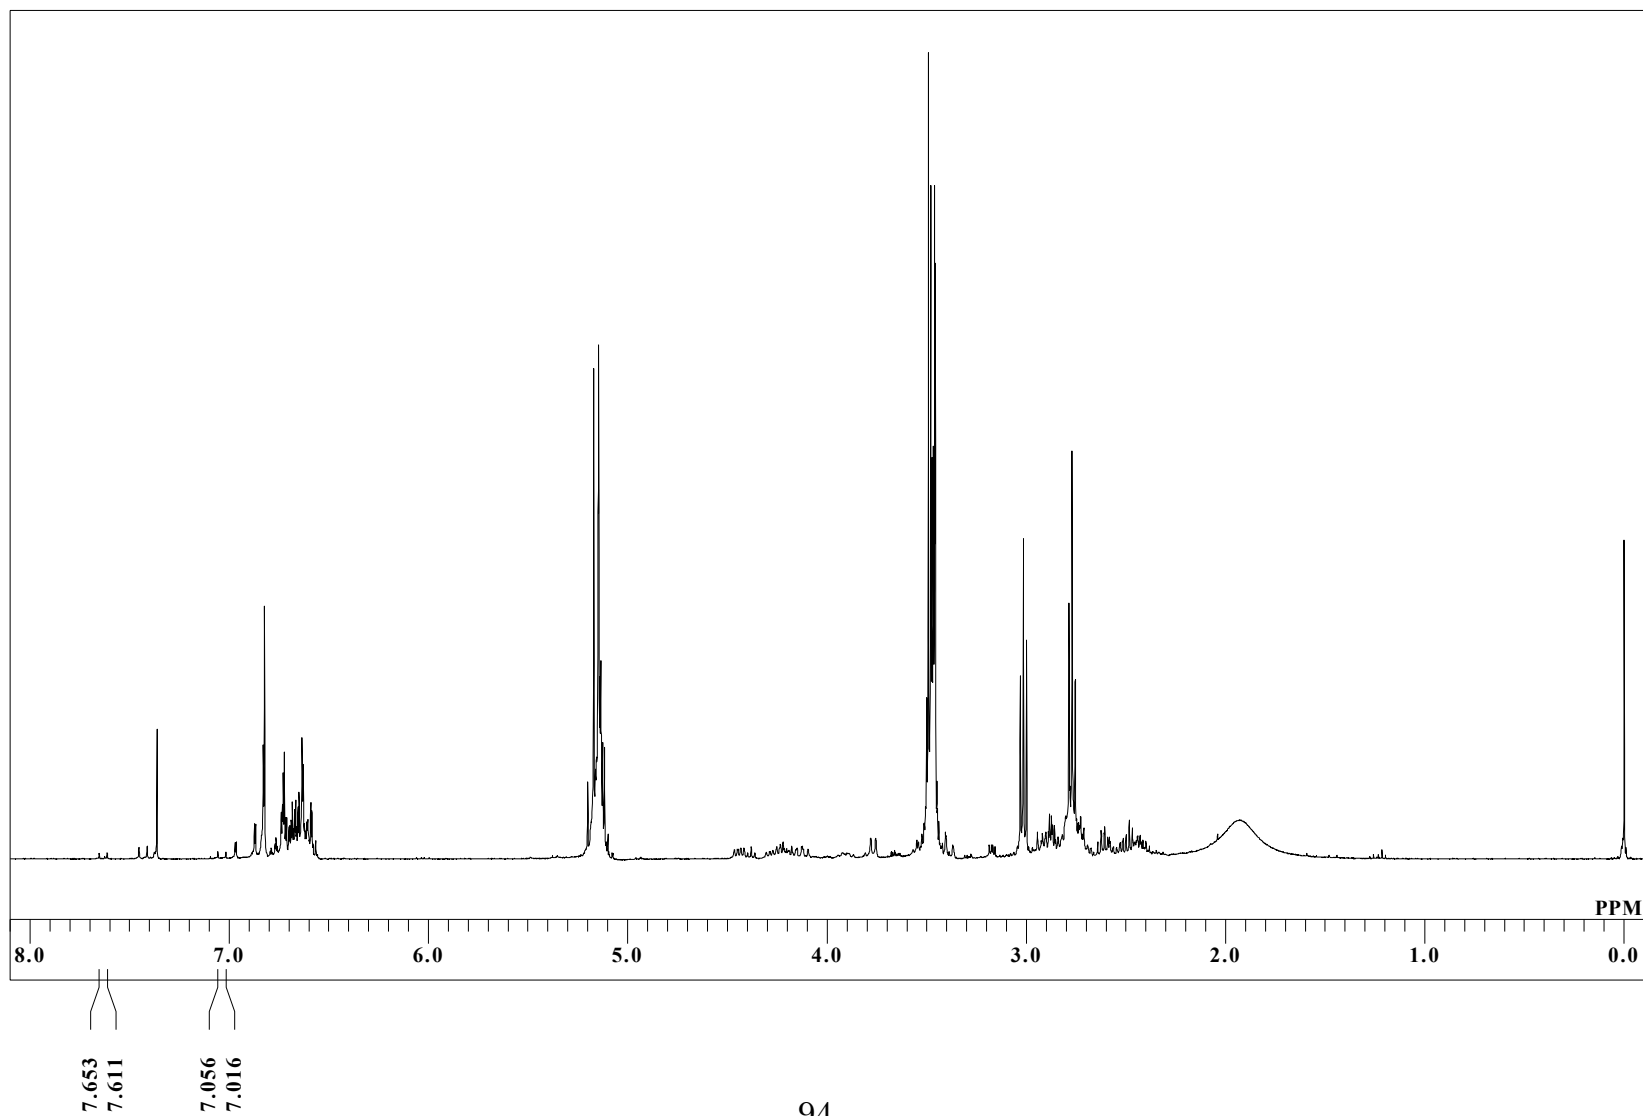

1) GO-Y030 in DMSO-d<sub>6</sub>

GO-Y030-DMSO-d<sub>6</sub>

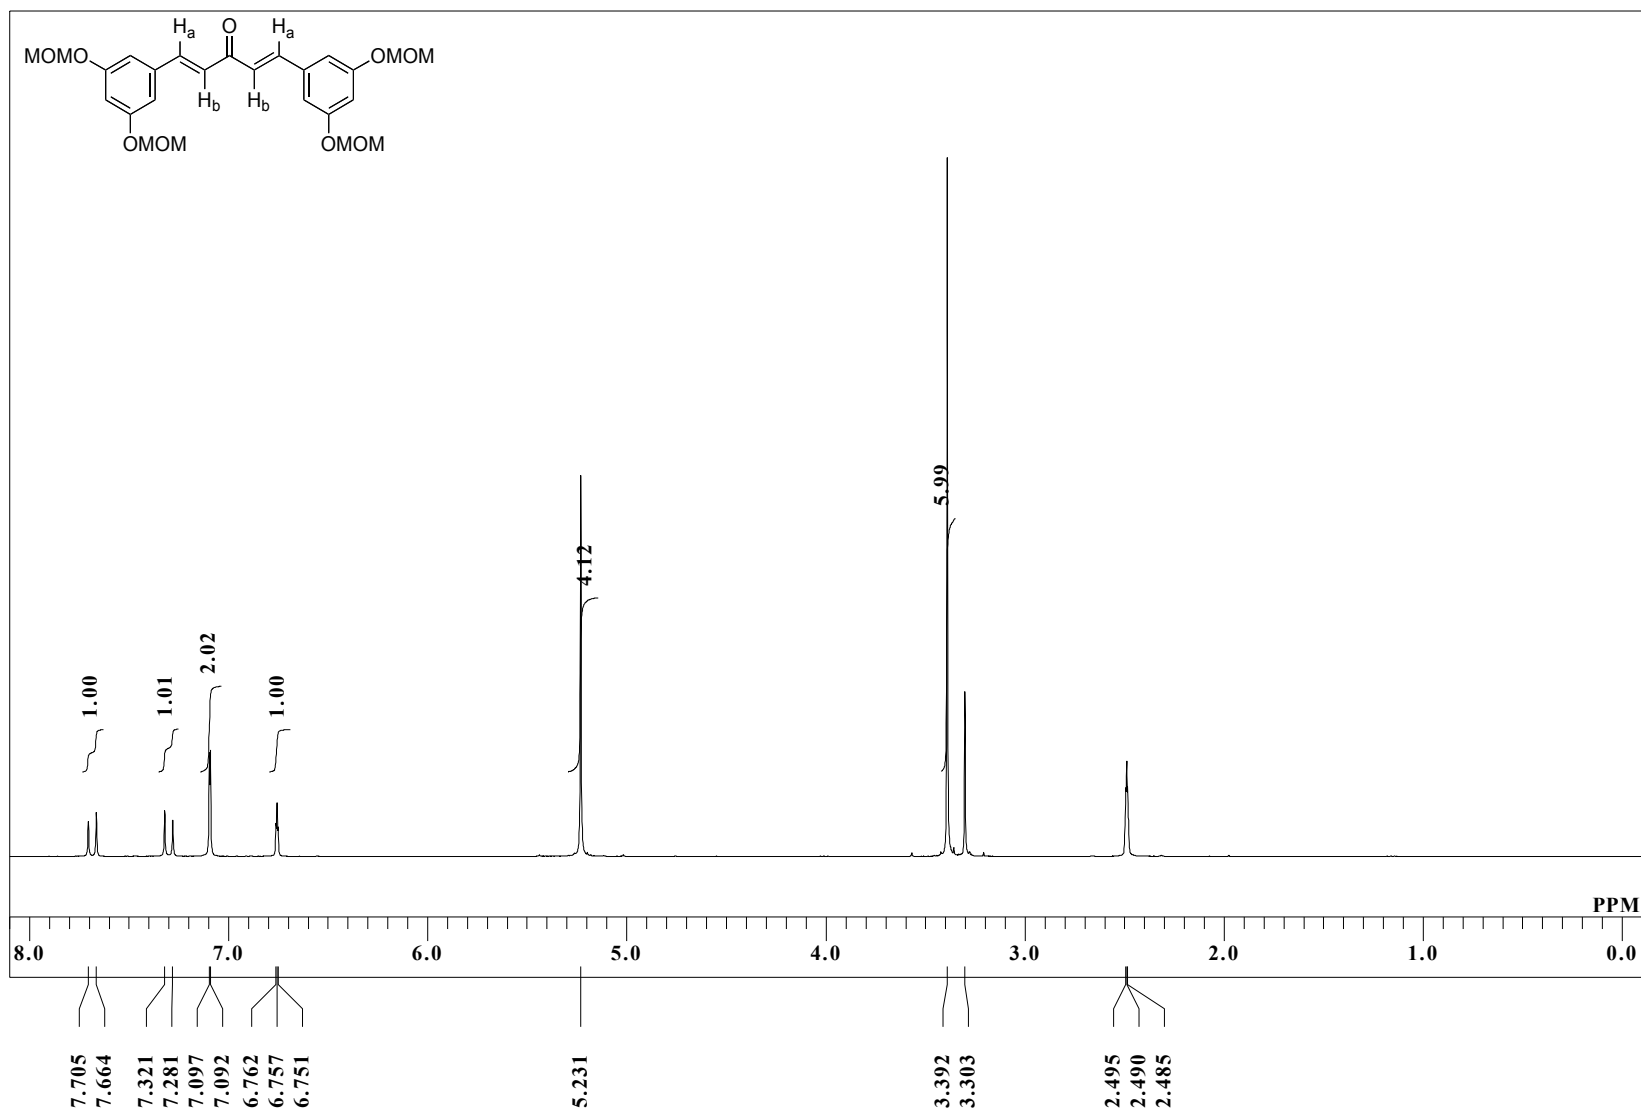

## 2) GO-Y030 in DMSO-d<sub>6</sub> 5 min after the addition of cysteamine (4 eq.)

Note the disappearance of the enone signals at  $\delta$  7.68 and 7.30 ( $J = 16.2$  Hz, H<sub>a</sub> and H<sub>b</sub>, respectively).

GO-Y030+cyst DMSO-d<sub>6</sub> (5 min)

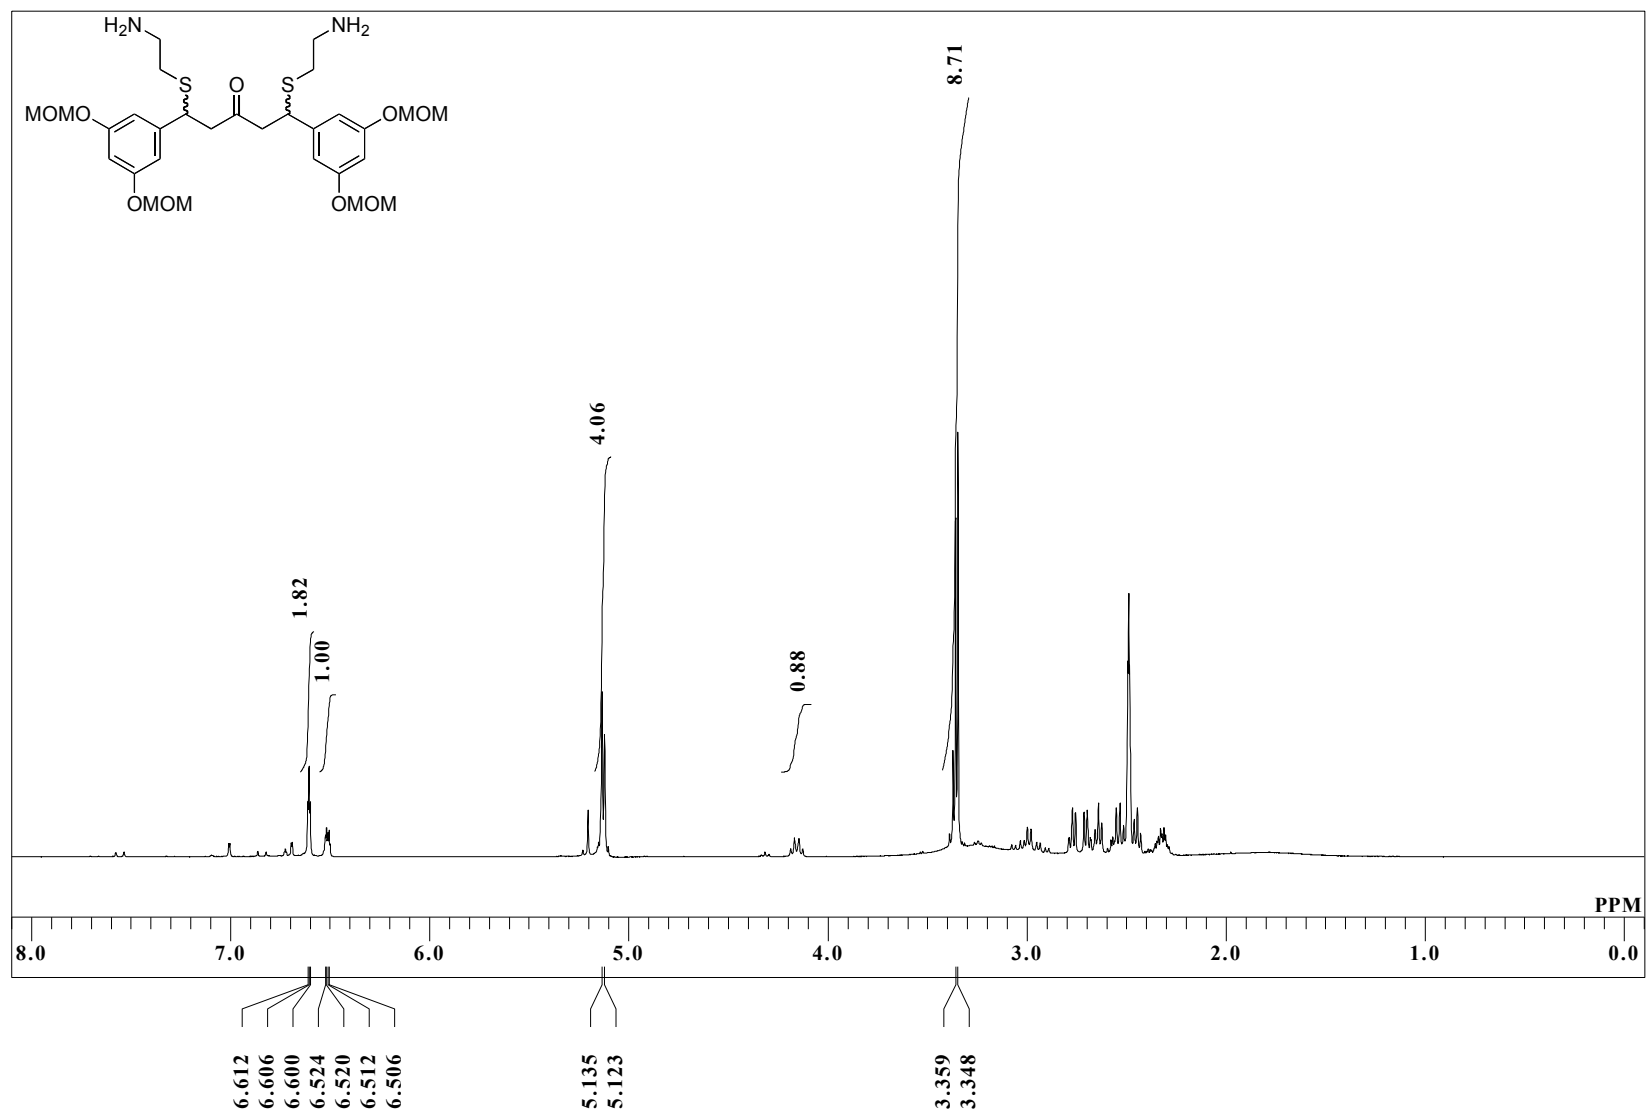

**3) GO-Y030 in DMSO-d<sub>6</sub> 1 h after the addition of cysteamine (4 eq.)**

Note the re-appearance of the enone signals at  $\delta$  7.68 and 7.30 ( $J = 16.0$  Hz, H<sub>a</sub> and H<sub>b</sub>, respectively).

**GO-Y030+cyst. diluted with CDCl<sub>3</sub> (1 h)**

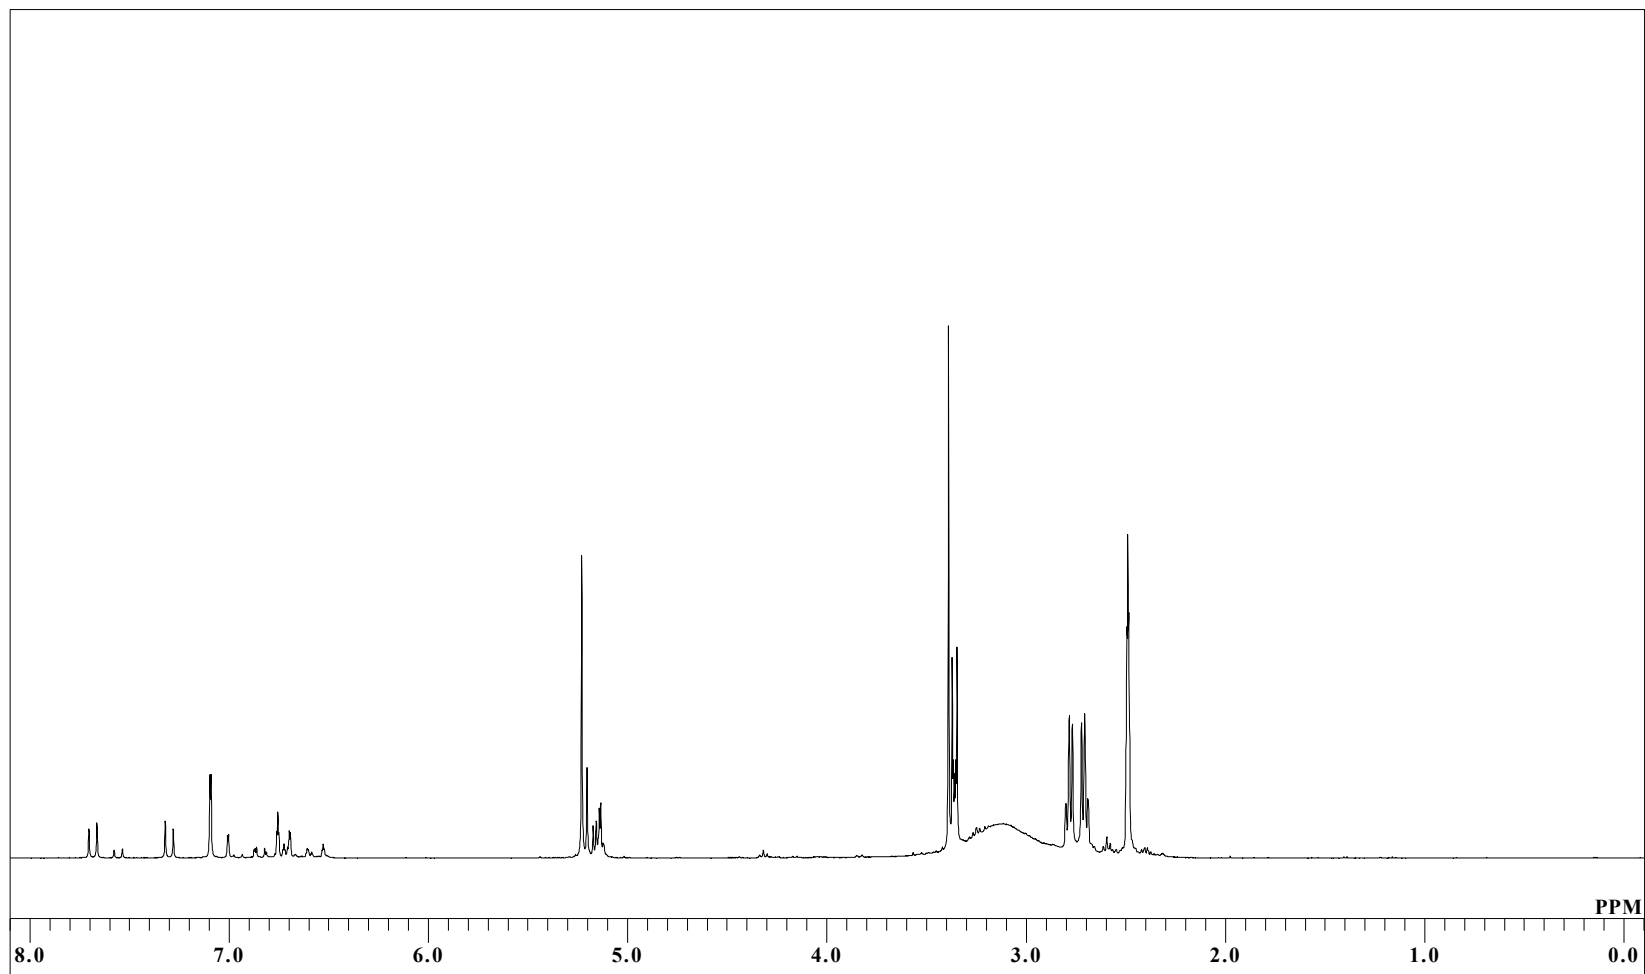

#### 4) GO-Y030 in DMSO-d<sub>6</sub> 6 h after the addition of cysteamine (4 eq.)

Note the re-appearance of the enone signals at  $\delta$  7.68 and 7.30 ( $J = 16.0$  Hz, H<sub>a</sub> and H<sub>b</sub>, respectively)

GO-Y030+cyst DMSO-d<sub>6</sub> (6 h)

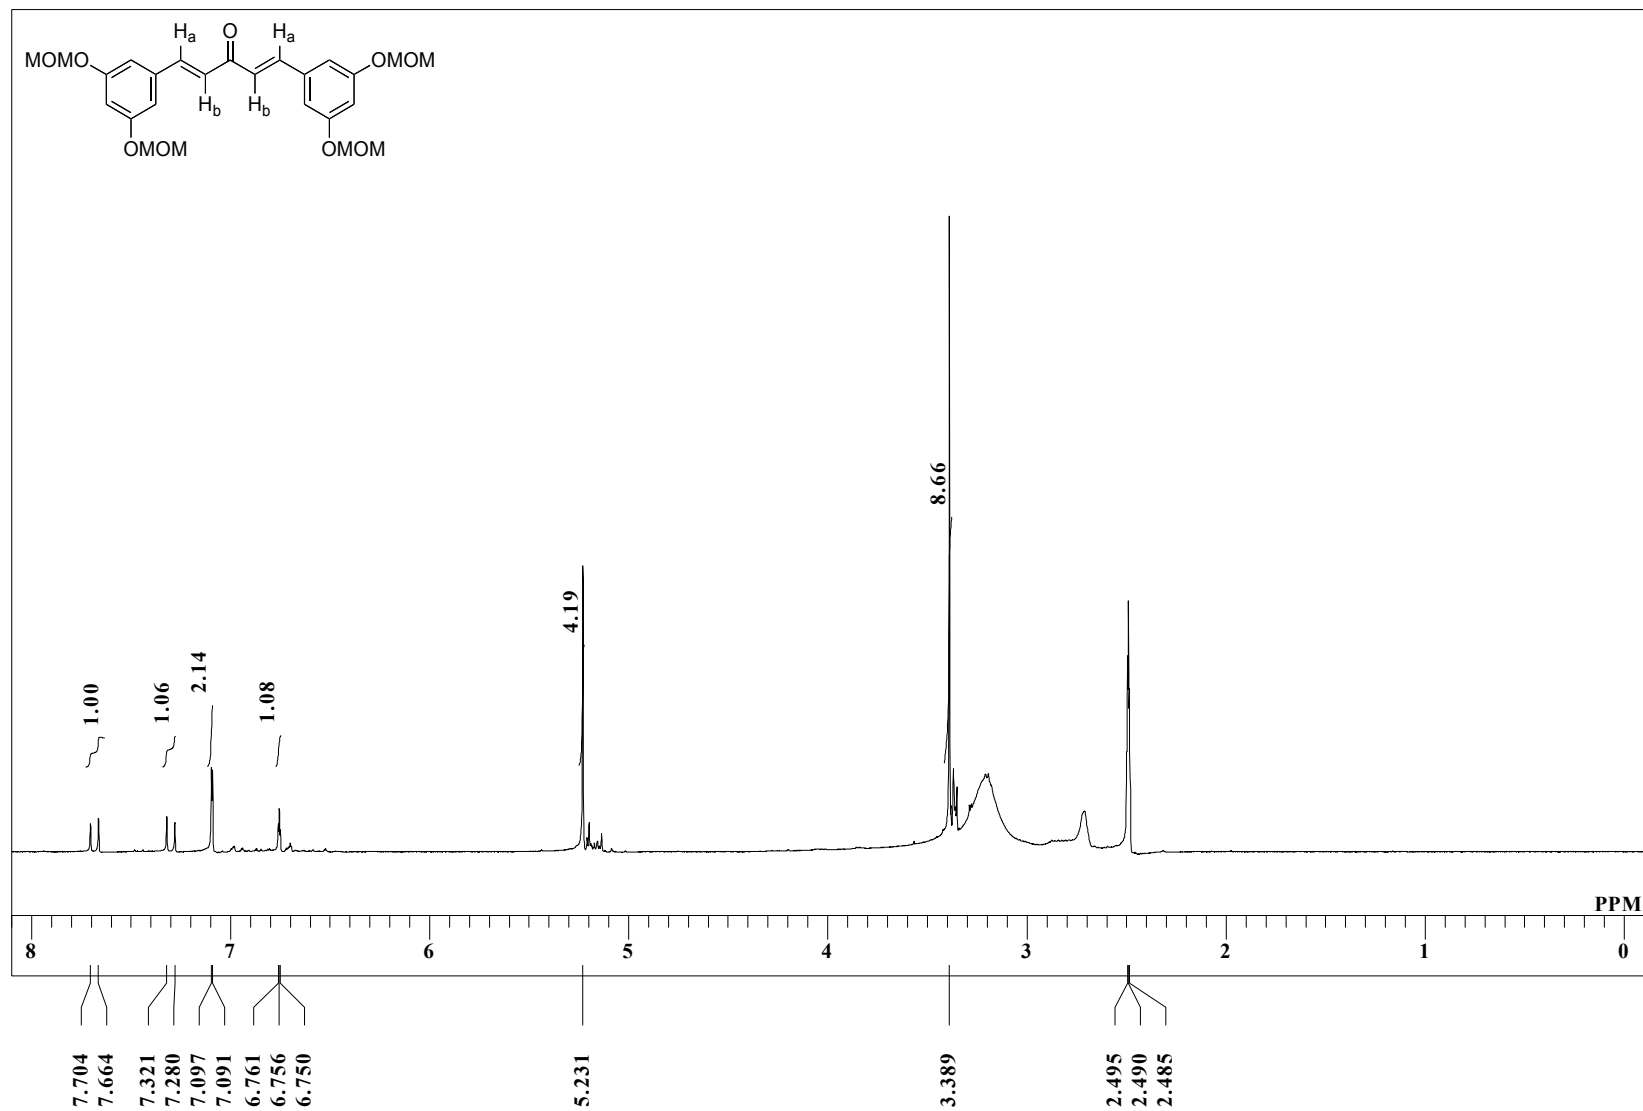

Supplement: c6ob01771a1.pdf [file c6ob01771a1.pdf]
